# Supplementary material
Source: PubMed Central journal article supplement (PMC5477004)
Supplement: ol7b01324_si_001.pdf [file ol7b01324_si_001.pdf]

## Supporting Information

### Sulfur-Switch Ugi-Reaction For Macrocyclic Disulfide-Bridged Peptidomimetics

Thimmalapura M. Vishwanatha, Enrico Bergamaschi and Alexander Dömling\*  
University of Groningen, Department of Drug Design, A. Deusinglaan 1, 9713 AV Groningen,  
The Netherlands.

#### Contents

|                                                                                                                    |           |
|--------------------------------------------------------------------------------------------------------------------|-----------|
| General Information                                                                                                | S2        |
| Procedure for the Synthesis of intermediates, 1-12                                                                 | S3-S14    |
| Optimization of Ugi reaction                                                                                       | S15       |
| General Procedure for Ugi reaction and characterization data for compounds                                         | S16-S31   |
| General Procedure for the synthesis of disulfide peptidomimetics and characterization data for disulfide compounds | S32-S43   |
| HPLC, fragmentation mechanism and ESI-MS/MS and regioisomers 5a, 5b and 5c                                         | S44-S49   |
| Copies of Spectra for <sup>1</sup> H NMR, <sup>13</sup> C NMR, SFC-HPLC, HRMS and ESI-MS of all compounds          | S50- S146 |

## General Information

All reactions involving air-sensitive reagents were carried out with magnetic stirring and oven-dried glassware with rubber septa under argon, unless otherwise stated. All commercially available chemicals and reagent grade solvents were used directly without further purification, unless otherwise specified. Reactions were monitored by thin-layer chromatography (TLC) on Merck Silica Plates using UV-light (254 nm) detection or visualizing agents (e.g. iodine,  $\text{KMnO}_4$  stain). Flash chromatography was conducted on a silica gel (230-400 mesh) using a Teledyne ISCO CombiFlash® Rf or Grace Reveleris X2. NMR spectra were recorded at room temperature using a on a Bruker Avance 500 spectrometer ( $^1\text{H}$  NMR at 500 and  $^{13}\text{C}$  NMR at 126 MHz) with tetramethylsilane (TMS) as an internal standard. Mass spectra were measured on a Waters Investigator Supercritical Fluid Chromatograph with a 3100 MS Detector (ESI) using a solvent system of methanol and  $\text{CO}_2$  on a Viridis silica gel column (4.6 × 250 mm, 5  $\mu\text{m}$  particle size) or Ethyl pyridine column and reported as (m/z). The regioisomers (5a, 5b and 5c) were separated using Agilent 1200 series RP-HPLC system. Separation was carried out on a Zobrax C18 column at a flow rate of 5mL/min with a isocratic 42% Acetonitrile in Water. The eluent was detected on 254 nm. MS/MS was carried out on a 4000QTRAP tandem mass spectrometer

## 1. Methyl S-trityl-L-cysteinate

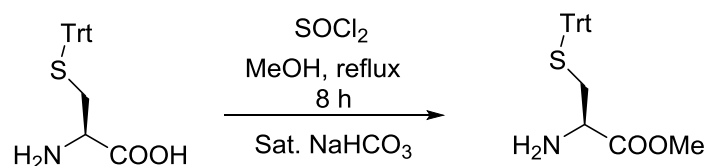

To a stirred solution of S-trityl-L-cysteine (1.0 g, 2.76 mmol) in 50 mL of methanol at 0 °C was added thionyl chloride (1.50 mL, 0.206 mmol) in a drop wise fashion. The solution was allowed to warm up to room temperature and then refluxed at 80 °C for 5 h. The solvent was removed under reduced pressure and the crude product was extracted with ethyl acetate and washed with saturated sodium bicarbonate for several times. The organic layer was dried over anhydrous magnesium sulfate, filtered and concentrated to give ester as pale yellow gum.

yield: 85% (0.865 g)

yellow gum

R<sub>f</sub> 0.41 (PE/EtOAc, 1:1)

[α]<sub>D</sub><sup>20</sup> = +30.4 (C1, CHCl<sub>3</sub>)

<sup>1</sup>H NMR (500 MHz, CDCl<sub>3</sub>) δ 7.47 – 7.14 (m, 15H), 3.62 (s, 3H), 3.16–3.21 (m, 1H), 2.58 (dd, J = 12.4, 4.9 Hz, 1H), 2.47 (dd, J = 12.5, 7.7 Hz, 1H).

<sup>13</sup>C NMR (126 MHz, CDCl<sub>3</sub>) δ 174.1, 144.4, 129.7, 129.5, 128.0, 127.9, 127.7, 126.8, 126.7, 66.8, 53.7, 52.1, 36.8.

MS (ESI) m/z calculated for C<sub>23</sub>H<sub>23</sub>NO<sub>2</sub>S [M+Na]<sup>+</sup> : 400.13; found [M+Na]<sup>+</sup>: 400.10.

## 2. Methyl N-formyl-S-trityl-L-cysteinate

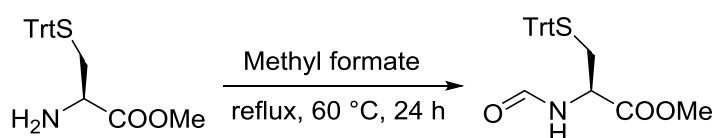

Amine **2** (1.0 g, 2.65 mmol) was dissolved in methyl formate (10 mL, solvent) and the solution was allowed to reflux at 60 °C until TLC showed complete consumption of the starting material (usually 24 h). The solvent was evaporated and the product was purified through flash column chromatography (0 to 80% EtOAc in PE for 20 min) to yield formyl ester **3** as white solid.

yield: 95% (1.03 g)

white solid, mp: 132–133 °C

R<sub>f</sub> 0.50 (PE/EtOAc, 1:1)

[α]<sub>D</sub><sup>20</sup> = +18.8 (C1, CHCl<sub>3</sub>).

<sup>1</sup>H NMR (500 MHz, CDCl<sub>3</sub>) δ 7.95 (d, *J* = 1.3 Hz, 1H), 7.50 – 7.11 (m, 16H), 6.14 (d, *J* = 8.1 Hz, 1H), 4.64 (dt, *J* = 8.2, 5.2 Hz, 1H), 3.68 (s, 3H), 2.77 (dd, *J* = 12.7, 5.8 Hz, 1H), 2.69 (dd, *J* = 12.9, 6.5 Hz, 1H).

<sup>13</sup>C NMR (126 MHz, CDCl<sub>3</sub>) δ 170.3, 160.4, 144.1, 129.4, 128.0, 128.0, 126.9, 126.8, 77.3, 77.1, 76.8, 67.0, 52.6, 49.7, 33.5.

MS (ESI) *m/z* calculated for C<sub>24</sub>H<sub>23</sub>NO<sub>3</sub>S [M+Na]<sup>+</sup> : 428.12; found [M+Na]<sup>+</sup>: 428.20.

### 3. Methyl (R)-2-isocyano-3-(tritylthio)propanoate

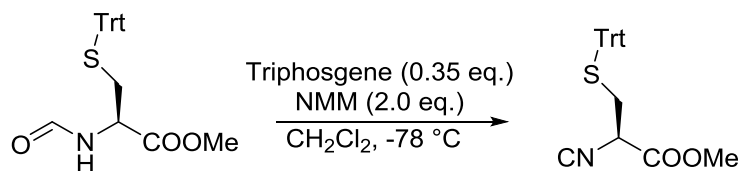

To a solution of *N*-formyl Cys(Trt)-methyl ester **3** (30.0 g, 74.0 mmol) in CH<sub>2</sub>Cl<sub>2</sub> (150.0 mL) at -78 °C, *N*-methylmorpholine (2.0 eq. 16.5 mL) was added. After 5 mins triphosgene (7.6 g, 0.35 eq.) in CH<sub>2</sub>Cl<sub>2</sub> (50.0 mL) was added drop wise and the reaction mixture was stirred for 3h at -78 °C (TLC analysis). Saturated NaHCO<sub>3</sub> solution (10 mL) was added at same temperature



and allowed to warm to room temperature. The reaction mixture was extracted with CH<sub>2</sub>Cl<sub>2</sub>, the organic extracts were separated, dried over anhydrous Na<sub>2</sub>SO<sub>4</sub>, filtered, and concentrated. The solution was diluted with diethyl ether (10 mL) and stored at -15 °C for 5 h which resulted in pure solid of isocyanide **4** which was collected by filtration.

yield = 85 % (24.3 g)

white solid, mp: 96 –97 °C

R<sub>f</sub> 0.42 (EtOAc/ PE, 10:90)

[α]<sub>D</sub><sup>20</sup> = +59.2 (C1, CHCl<sub>3</sub>)

<sup>1</sup>H NMR (500 MHz, CDCl<sub>3</sub>) δ 7.57 – 7.06 (m, 16H), 3.70 (s, 3H), 3.34 (ddd, *J* = 7.7, 5.8, 1.6 Hz, 1H), 2.89 – 2.63 (m, 2H).

<sup>13</sup>C NMR (126 MHz, CDCl<sub>3</sub>) δ 165.6, 160.9, 143.9, 129.4, 129.2, 128.2, 128.0, 128.0, 127.9, 127.1, 77.3, 77.1, 76.8, 67.5, 55.3, 53.4, 34.2.

MS (ESI) *m/z* calculated for C<sub>24</sub>H<sub>21</sub>NO<sub>2</sub>S [M+Na]<sup>+</sup> : 411.12; found [M+Na]<sup>+</sup>: 410.34.

#### 4. Methyl S-trityl-R-cysteinate

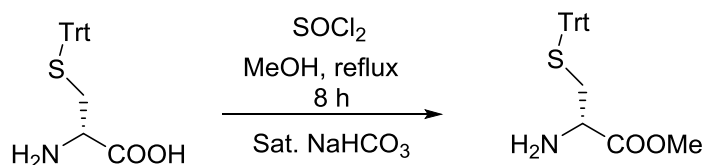

To a stirred solution of S-trityl-R-cysteine **1b** (1.0 g, 2.76 mmol) in 50 mL of methanol at 0 °C thionyl chloride (1.50 mL, 0.206 mmol) was added in a drop wise fashion. The solution was allowed to warm up to room temperature and then refluxed at 80 °C for 5 h. The solvent was removed under reduced pressure and the crude product was extracted with ethyl acetate and washed with saturated sodium bicarbonate for several times. The organic layer was dried over anhydrous magnesium sulfate, filtered and concentrated to give ester **2b** as pale yellow gum.

yield: 80% (0.830 g)

yellow gum

R<sub>f</sub> 0.40 (PE/EtOAc, 1:1)

[α]<sub>D</sub><sup>20</sup> = -102.4 (C1, CHCl<sub>3</sub>)

<sup>1</sup>H NMR (500 MHz, CDCl<sub>3</sub>) δ 7.50 – 7.39 (m, 6H), 7.32 (dd, *J* = 8.5, 6.9 Hz, 6H), 7.29 – 7.18 (m, 3H), 3.69 (s, 3H), 3.24 (dd, *J* = 7.9, 4.8 Hz, 1H), 2.63 (dd, *J* = 12.5, 4.7 Hz, 1H), 2.51 (dd, *J* = 12.5, 7.8 Hz, 1H).

<sup>13</sup>C NMR (126 MHz, CDCl<sub>3</sub>) δ 174.2, 144.5, 130.1, 130.1, 129.6, 129.5, 128.3, 128.2, 128.1, 128.0, 127.9, 127.1, 126.8, 77.4, 77.1, 76.8, 66.9, 53.8, 52.2, 36.9.

MS (ESI) *m/z* calculated for C<sub>23</sub>H<sub>23</sub>NO<sub>2</sub>S [M+Na]<sup>+</sup> : 400.13; found [M+Na]<sup>+</sup>: 400.04.

## 5. Methyl N-formyl-S-trityl-R-cysteinate

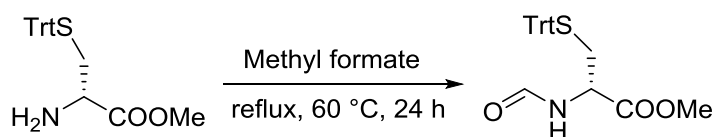

Amine **2b** (1.0 g, 2.65 mmol ) was dissolved in methyl formate (10 mL, solvent) and the assembly was allowed to reflux at 60 °C until TLC showed complete consumption of starting material (usually 24 h). The solvent was evaporated and the product was purified through column chromatography (0 to 80% EtOAc in PE) to yield formyl ester **3b** as white solid.

yield: 78 % (0.837 mg)

white solid, mp: 135–137 °C

R<sub>f</sub> 0.52 (PE/EtOAc, 1:1)

[α]<sub>D</sub><sup>20</sup> = -18.4 (C1, CHCl<sub>3</sub>)

$^1\text{H}$  NMR (500 MHz,  $\text{CDCl}_3$ )  $\delta$  8.01 (s, 1H), 7.52 – 7.43 (m, 6H), 7.29 (dt,  $J = 33.1, 7.5$  Hz, 10H), 6.24 (t,  $J = 12.6$  Hz, 1H), 4.69 (dt,  $J = 8.1, 5.2$  Hz, 1H), 3.79 – 3.65 (m, 3H), 2.82 (dd,  $J = 12.7, 5.8$  Hz, 1H), 2.69 (dd,  $J = 12.7, 4.7$  Hz, 1H).

$^{13}\text{C}$  NMR (126 MHz,  $\text{CDCl}_3$ )  $\delta$  170.5, 160.6, 144.3, 129.6, 129.5, 128.2, 128.1, 127.1, 127.0, 52.8, 49.8, 33.7.

MS (ESI)  $m/z$  calculated for  $\text{C}_{24}\text{H}_{23}\text{NO}_3\text{S}$   $[\text{M}+\text{Na}]^+$ : 428.12; found  $[\text{M}+\text{Na}]^+$ : 428.30.

## 6. Methyl (S)-2-isocyano-3-(tritylthio)propanoate

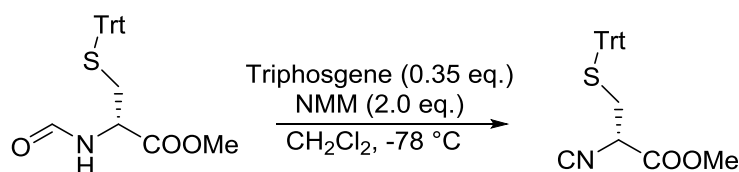

To a solution of *N*-formyl Cys(Trt)-methyl ester **3b** (2.0 g, 5.0 mmol) in  $\text{CH}_2\text{Cl}_2$  (15.0 mL) was cooled to  $-78^\circ\text{C}$ . *N*-methylmorpholine (2.0 eq. 1.1 mL) was added. After 5 mins triphosgene (0.518 mg, 0.35 eq.) in  $\text{CH}_2\text{Cl}_2$  (5.0 mL) was added drop wise and the reaction mixture was stirred for 3h at  $-78^\circ\text{C}$  (TLC analysis). Saturated  $\text{NaHCO}_3$  solution (5 mL) was added at same temperature and allowed to warm to room temperature. The reaction mixture was extracted with  $\text{CH}_2\text{Cl}_2$ , the organic extracts were separated, dried over anhydrous  $\text{Na}_2\text{SO}_4$ , filtered, and concentrated. The solution was diluted with diethyl ether (10 mL) and stored at  $-15^\circ\text{C}$  for 5 h resulted in pure solid of isocyanide **4b** which was collected by filtration.

yield = 85 % (24.3 g)

white solid, mp:  $101 - 103^\circ\text{C}$

$R_f$  0.42 (EtOAc/ PE, 10:90)

$[\alpha]_{\text{D}}^{20} = -29.4$  (C1,  $\text{CHCl}_3$ ).

$^1\text{H}$  NMR (500 MHz,  $\text{CDCl}_3$ )  $\delta$  7.56 – 7.49 (m, 6H), 7.37 (dd,  $J = 8.5, 6.9$  Hz, 6H), 7.35 – 7.26 (m, 3H), 3.76 (s, 3H), 3.43 (dd,  $J = 7.9, 5.8$  Hz, 1H), 2.91 – 2.80 (m, 2H).

$^{13}\text{C}$  NMR (126 MHz,  $\text{CDCl}_3$ )  $\delta$  165.7, 161.1, 144.0, 130.7, 129.5, 128.3, 128.0, 128.0, 127.7, 127.3, 127.2, 127.1, 67.6, 55.4, 53.5, 34.3.

MS (ESI)  $m/z$  calculated for  $\text{C}_{24}\text{H}_{21}\text{NO}_2\text{S}$   $[\text{M}+\text{Na}]^+$ : 411.12; found  $[\text{M}+\text{Na}]^+$ : 410.11.

## 7. 2-(Tritylsulfanyl)ethanamine

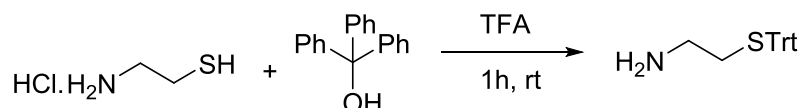

A solution of cysteamine hydrochloride (1.04 g, 9.17 mmol) and triphenylmethanol (2.18 g, 8.37 mmol) in TFA (5 mL) was stirred at room temperature for 1 h. After co-evaporation with acetonitrile the residue was dissolved in ethyl acetate and washed with NaOH (aq) 1 M, water and brine. The organic layer was dried over  $\text{Na}_2\text{SO}_4$ , filtered and the solvent was evaporated under reduced pressure to yield 2-(tritylsulfanyl)ethanamine which was used without further purification.

yield: 95% (5.9 g)

white solid, Mp: 144-146 °C

$R_f$  0.25 (MeOH/  $\text{CH}_2\text{Cl}_2$ , 5:95)

$^1\text{H}$  NMR (500 MHz, MeOH- $d_4$ )  $\delta$  7.54 – 7.36 (m, 7H), 7.36 – 7.23 (m, 8H), 2.56 – 2.46 (m, 4H);

$^{13}\text{C}$  NMR (126 MHz, MeOH- $d_4$ )  $\delta$  144.5, 129.3, 127.7, 126.6, 67.0, 38.9, 30.8.

MS (ESI)  $m/z$  calculated for  $\text{C}_{21}\text{H}_{21}\text{NS}$   $[\text{M}+\text{Na}]^+$ : 342,12; found: 342,15.

## 8. Trityl thioacetic acid

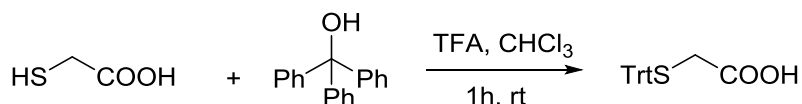

To a mixture of mercaptoacetic acid (3.48 mL, 50.0 mmol) and triphenylmethanol (13.0 g, 50.0 mmol) in 50 chloroform was added trifluoroacetic acid (10 mL) in 5 min. After stirring at

room temperature for 1 h, the volatiles were removed *in vacuo*. The crude product was purified by recrystallization (CH<sub>2</sub>Cl<sub>2</sub>/Hexane = 1/2) to give tritylsulfanylacetic acid.

yield: 98% (16.37 g)

white solid, Mp: 159-161 °C

R<sub>f</sub> 0.38 (EtOAc/ PE/ AcOH, 30:70:1.0)

<sup>1</sup>H NMR (500 MHz, CDCl<sub>3</sub>) δ 7.56 – 7.15 (m, 15H), 3.06 (s, 2H).

<sup>13</sup>C NMR (126 MHz, CDCl<sub>3</sub>) δ 175.5, 143.9, 129.5, 128.1, 127.9, 127.0, 67.3, 34.5.

MS (ESI) m/z calculated for C<sub>21</sub>H<sub>18</sub>O<sub>2</sub>S [M+Na]<sup>+</sup>: 357.09; found: 357.21.

### 9. N-methoxy-N-methyl-2-(tritylthio)acetamide

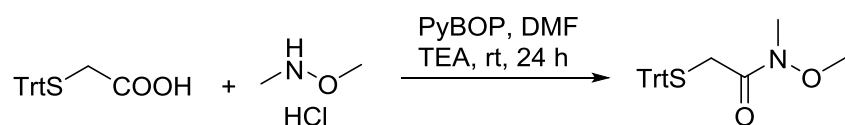

To a solution of acid (20.0 mmol), PyBOP (1.1 equiv.) and TEA (2.5 equiv.) in CH<sub>2</sub>Cl<sub>2</sub> (50 mL) was added *N,O*-dimethylhydroxylamine hydrochloride (1.2 equiv.) and the solution was allowed to stir at RT overnight. The solution was then diluted with excess CH<sub>2</sub>Cl<sub>2</sub> and washed consecutively with a 1 M HCl solution (3 x 10 mL), saturated aq. NaHCO<sub>3</sub> (3 x 10 mL), and water (1 x 10 mL). The organic phase was dried over MgSO<sub>4</sub>, filtered and concentrated *in vacuo*. The residue was purified by flash chromatography (0 to 100% EtOAc in PE) on silica gel to afford the desired Weinreb amide.

yield: 95% (7.16 g)

white solid, Mp: 125-127 °C

R<sub>f</sub> 0.32 (EtOAc/ PE, 30:70)

<sup>1</sup>H NMR (500 MHz, CDCl<sub>3</sub>) δ 7.52 – 7.44 (m, 7H), 7.32-7.31 (m, 8H), 3.49 (s, 3H), 3.14 (s, 3H), 3.11 (s, 2H).

$^{13}\text{C}$  NMR (126 MHz,  $\text{CDCl}_3$ )  $\delta$  172.0, 144.3, 129.6, 128.0, 127.8, 126.8, 77.3, 77.0, 76.8, 66.9, 61.4, 33.7.

MS (ESI)  $m/z$  calculated for  $\text{C}_{23}\text{H}_{23}\text{NO}_2\text{S}$   $[\text{M}+\text{Na}]^+$ : 400.13; found: 400.25.

### 10.3-(Tritylthio)propanoic acid

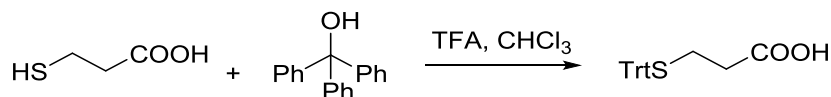

To a mixture of 2-mercaptoacetic acid (4.35 mL, 50.0 mmol) and triphenylmethanol (13.0 g, 50.0 mmol) in 50 chloroform was added trifluoroacetic acid (10 mL) in 5 min. After stirring at room temperature for 1 h, the volatiles were removed *in vacuo*. The crude product was purified by recrystallization ( $\text{CH}_2\text{Cl}_2/\text{Hexane} = 1/2$ ) to give 3-(tritylthio)propanoic acid.

yield: 98% (17.02 g)

white solid, Mp: 196-198 °C

$R_f$  0.52 (EtOAc/ PE/AcOH, 30:70:1.0)

$^1\text{H}$  NMR (500 MHz,  $\text{CDCl}_3$ )  $\delta$  7.50 – 7.42 (m, 6H), 7.39 – 7.29 (m, 6H), 7.29 – 7.21 (m, 4H), 2.49 (t,  $J = 7.3$  Hz, 2H), 2.27 (d,  $J = 14.6$  Hz, 2H).

$^{13}\text{C}$  NMR (126 MHz,  $\text{CDCl}_3$ )  $\delta$  174.5, 144.5, 129.6, 128.0, 126.7, 60.5, 33.1, 26.5.

MS (ESI)  $m/z$  calculated for  $\text{C}_{22}\text{H}_{20}\text{O}_2\text{S}$   $[\text{M}+\text{Na}]^+$ : 371.10; found: 371.26.

### 11. N-methoxy-N-methyl-3-(tritylthio)propanamide

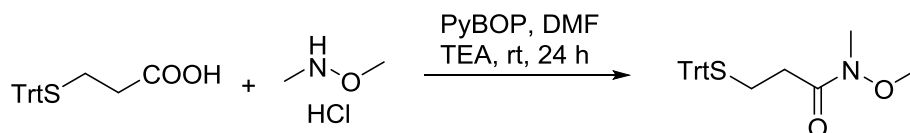

To a solution of tritylsulfanylacetic acid (10.44g, 30 mmol), PyBOP (17.17 g, 33.0 mmol) and TEA (10.42 mL, 75.0 mmol) in  $\text{CH}_2\text{Cl}_2$  (80 mL) was added *N,O*-dimethylhydroxylamine hydrochloride (3.51 g, 36.0 mmol) and the solution was allowed to stir at RT overnight. The

solution was then diluted with excess CH<sub>2</sub>Cl<sub>2</sub> (50 mL) and washed consecutively with a 1 M HCl solution (3 x 10 mL), saturated aq. NaHCO<sub>3</sub> (3 x 10 mL), and water (1 x 10 mL). The organic phase was dried over MgSO<sub>4</sub>, filtered and concentrated *in vacuo*. The residue was purified by flash chromatography (0 to 80% EtOAc in PE) on silica gel to afford the desired Weinreb amide.

yield: 95% (11.14 g)

white solid, Mp: 145-147 °C

R<sub>f</sub> 0.52 (EtOAc/ PE, 30:70)

<sup>1</sup>H NMR (500 MHz, CDCl<sub>3</sub>) δ 7.49 – 7.41 (m, 7H), 7.36 – 7.25 (m, 8H), 3.59 (s, 3H), 3.14 (s, 3H), 2.54 (t, *J* = 7.4 Hz, 2H), 2.41 (d, *J* = 8.5 Hz, 2H).

<sup>13</sup>C NMR (126 MHz, CDCl<sub>3</sub>) δ 177.6, 144.8, 129.6, 127.9, 126.6, 61.2, 60.6, 32.1, 31.4, 26.7.

MS (ESI) *m/z* calculated for C<sub>24</sub>H<sub>25</sub>NO<sub>2</sub>S [M+Na]<sup>+</sup>: 414.15; found: 414.23.

## 12. 2-(Tritylthio)acetaldehyde

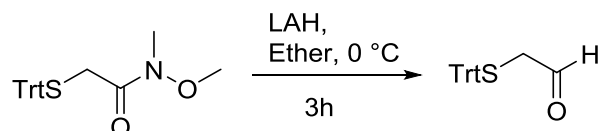

A stirred solution of Weinreb amide **7** (10.0 mmol) in dry THF (50 mL) was cooled to 0 °C. Lithium aluminium hydride (LAH, 11.0 mmol) was added in portions and after 30 minutes 0.2 M KHSO<sub>4</sub> (30 mL) was added. The organic compounds were extracted with diethyl ether (3x 30 mL). The combined organic phases were washed with 1 M HCl (3x 10 mL), brine (3x 10 mL) and dried (MgSO<sub>4</sub>). The solvent was evaporated under reduced pressure and the crude colorless oil was immediately used for Ugi reaction (analysis was done only with TLC analysis).

yield: 88% (2.8 g)

pale yellow gum

R<sub>f</sub> 0.25 (EtOAc/ PE, 10:90)

### 13.3-(Tritylthio)propanal

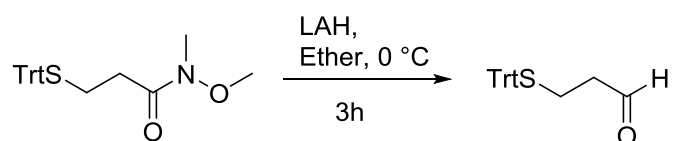

A stirred solution of Weinreb amide **9** (10.0 mmol) in dry THF (50 mL) was cooled to 0 °C. Lithium aluminium hydride (11.0 mmol) was added in portions and after 30 minutes 0.2 M KHSO<sub>4</sub> (30 mL) was added. The organic compounds were extracted with diethyl ether (3x 30 mL). The combined organic phases were washed with 1 M HCl (3x 10 mL), brine (3x 10 mL) and dried (MgSO<sub>4</sub>). The solvent was evaporated under reduced pressure and the crude colorless oil was immediately used for Ugi reaction (analysis was done only with TLC analysis).

yield: 95% (3.15 g)

pale yellow gum

R<sub>f</sub> 0.31 (EtOAc/ PE, 10:90)

### 14. N-(2-(tritylthio)ethyl)formamide

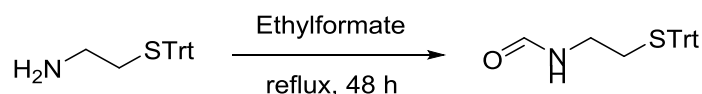

Amine (30.0 g, 93.92 mmol) was dissolved in methyl formate (150 mL) and CH<sub>2</sub>Cl<sub>2</sub> (50 mL) the assembly was allowed to reflux at 60 °C until TLC showed complete consumption of starting material (usually 48 h). The solvent was evaporated and the crude product was dissolved in CH<sub>2</sub>Cl<sub>2</sub> (200 mL) and passed through silica pad. The solvent was evaporated under reduced pressure followed by recrystallized in diethyl ether to yield formyl ester as white solid.



yield: 90% (29.34 g)

white solid, Mp: 131-133 °C

R<sub>f</sub> 0.44 (EtOAc/ PE, 50:50)

<sup>1</sup>H NMR (500 MHz, CDCl<sub>3</sub>) δ 8.02 (d, *J* = 1.5 Hz, 1H), 7.52 – 7.43 (m, 11H), 7.32-7.20(m, 6H), 5.51 (s, 1H), 3.13 (q, *J* = 6.2 Hz, 2H), 2.45 (dt, *J* = 30.0, 6.6 Hz, 2H).

<sup>13</sup>C NMR (126 MHz, CDCl<sub>3</sub>) δ 160.1, 143.8, 128.8, 127.3, 126.2, 66.3, 39.9, 36.0, 32.7, 31.1.

MS (ESI) *m/z* calculated for C<sub>22</sub>H<sub>21</sub>NOS [M+Na]<sup>+</sup>: 370.12; found: 370.26.

### 15. 2-Isocyanoethyl(trityl)sulfane

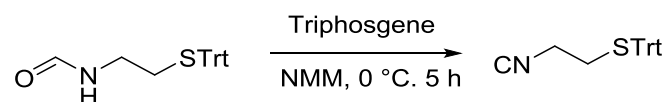

To a solution of N-(2-(tritylthio)ethyl)formamide (30.0 g, 80.1 mmol) in THF:CH<sub>2</sub>Cl<sub>2</sub> (50:150 mL) was cooled to -20 °C. N-methylmorpholine (17.62 mL, 160.2 mmol) was added. After 5 mins triphosgene (9.49 g, 32.08 mmol) was added portion wise over 10 min. The reaction mixture was stirred for 6h at -20 °C (TLC analysis). Saturated NaHCO<sub>3</sub> solution (500 mL) was added at 0 °C and allowed to cool to room temperature and stirred for 30 min . The reaction mixture was extracted with CH<sub>2</sub>Cl<sub>2</sub> (100 X 2), the organic extracts were separated, dried over anhydrous Mg<sub>2</sub>SO<sub>4</sub>, filtered, and concentrated. The crude isocyanide was purified through flash column chromatography 20% CH<sub>2</sub>Cl<sub>2</sub> in hexane.

yield: 75% (19.72 g)

pale yellow solid, Mp: 105-107 °C

R<sub>f</sub> 0.55 (EtOAc/ PE, 10:90)

<sup>1</sup>H NMR (500 MHz, CDCl<sub>3</sub>) δ 7.47 (dd, *J* = 7.7, 1.7 Hz, 7H), 7.35 (d, *J* = 7.3 Hz, 5H), 7.33 – 7.30 (m, 2H), 7.30 – 7.21 (m, 4H), 2.93 (t, *J* = 7.3 Hz, 2H), 2.60 (t, *J* = 7.2 Hz, 2H).

$^{13}\text{C}$  NMR (126 MHz,  $\text{CDCl}_3$ )  $\delta$  156.8, 144.2, 129.7, 129.5, 128.1, 127.9, 127.3, 127.0, 67.3, 40.6, 31.1.

MS (ESI)  $m/z$  calculated for  $\text{C}_{22}\text{H}_{19}\text{NS}$   $[\text{M}+\text{Na}]^+$ : 352.11; found: 352.24.

## Optimization of Ugi Reaction

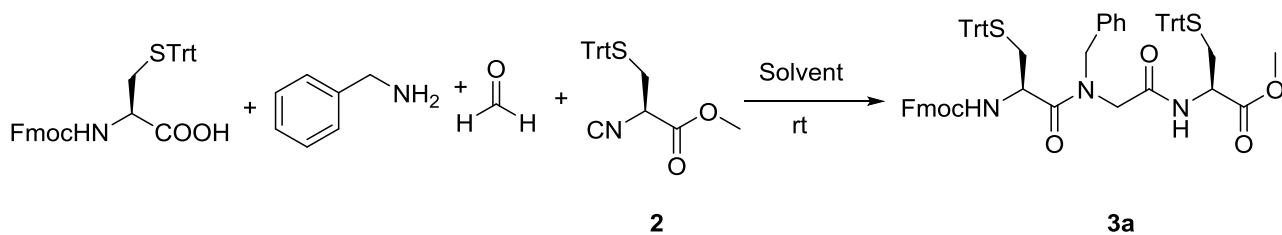

| Entry | Solvent (conc)                          | Time (h) | Temp (°C) | Yield (%) <sup>a,b</sup> |
|-------|-----------------------------------------|----------|-----------|--------------------------|
| a     | MeOH (1 M)                              | 48       | 25        | 5                        |
| b     | MeOH (0.2 M)                            | 24       | 40        | 20                       |
| b     | TFE (0.2 M)                             | 24       | 40        | 14                       |
| c     | HFIP (0.2 M)                            | 24       | 40        | 12                       |
| d     | THF (0.2 M)                             | 48       | 40        | 18                       |
| e     | DMF (0.2 M)                             | 48       | 40        | 20                       |
| f     | CH <sub>2</sub> Cl <sub>2</sub> (0.2 M) | 48       | 25        | 15                       |
| F     | MeOH:THF:DMF (0.2 M, 1:1:0.1)           | 24       | 25        | 52                       |
| G     | TFE:THF (0.2M, 5:1)                     | 24       | 25        | 50                       |

<sup>a</sup>All reactions were carried out in 1mmol scale; <sup>b</sup>Isolated yields after column purification.

### **Synthetic procedure for Ugi reaction**

**Procedure A:** The amine (1.0 eq.), aldehyde (1.0 eq.), acid (1.0 eq.) and isocyanide (387.0 mg, 1.0 mmol.) were dissolved in MeOH, THF and few drops of DMF (0.1 M, 10 mL, 7:2.5:0.5). The resulting mixture was stirred at room temperature for 24-48 hours. The solvent was removed under reduced pressure and the residue was purified using flash column chromatography (ethyl acetate: petroleum ether from 0 to 60).

**Procedure B:** The amine (1.0 equiv), acid (1.0 eq.) and isocyanide (387.0 mg, 1.0 mmol.) in a mixture of TFE and THF (0.1 M, 10 mL, 8:2 mL) was added aldehyde (1.0 eq.). The resulting mixture was stirred at room temperature for 24-48 hours. The solvent was removed under reduced pressure and the residue was purified using flash column chromatography (ethyl acetate: petroleum ether from 0 to 60 in 20 min).

*Note:* Diastereomeric ratios were measured according to methyl group singlet of the C-terminal ester



R<sub>f</sub> 0.35 (EtOAc/ PE, 20:80)

dr ratio: 3:2.8

<sup>1</sup>H NMR (500 MHz, CDCl<sub>3</sub>, mixture of diastereomers and rotamers) <sup>1</sup>H NMR (500 MHz, CDCl<sub>3</sub>)  
δ 7.81 (dt, *J* = 10.7, 7.7 Hz, 7H), 7.68 – 7.55 (m, 8H), 7.55 – 7.15 (m, 150H), 7.12 – 7.03 (m, 3H),  
7.03 – 6.98 (m, 2H), 5.31 (dt, *J* = 13.7, 5.8 Hz, 3H), 4.98 (tt, *J* = 9.5, 5.8 Hz, 2H), 4.91 – 4.77 (m,  
2H), 4.60 – 4.54 (m, 2H), 4.54 – 4.48 (m, 2H), 4.48 – 4.40 (m, 3H), 4.37 (ddd, *J* = 13.5, 8.5, 4.9  
Hz, 7H), 4.34 – 4.31 (m, 1H), 4.31 – 4.25 (m, 3H), 4.23 (td, *J* = 8.0, 2.8 Hz, 3H), 4.20 – 4.13 (m,  
2H), 4.08 (t, *J* = 15.6 Hz, 2H), 3.64 (s, 1H), 3.62 (s, 1H), 3.55 (s, 3H), 3.54 (s, 3H), 2.79 – 2.72 (m,  
1H), 2.70 (dd, *J* = 10.6, 4.4 Hz, 4H), 2.65 (dd, *J* = 12.3, 5.4 Hz, 2H), 2.62 – 2.59 (m, 2H), 2.58 –  
2.54 (m, 3H), 2.54 – 2.50 (m, 1H), 1.64 – 1.51 (m, 2H), 1.48 – 1.29 (m, 5H), 0.97 (d, *J* = 6.8 Hz,  
4H), 0.94 (d, *J* = 6.8 Hz, 7H), 0.92 (d, *J* = 6.6 Hz, 2H), 0.87 (d, *J* = 6.6 Hz, 4H), 0.85 (d, *J* = 6.6 Hz,  
2H), 0.81 (d, *J* = 6.3 Hz, 2H), 0.77 (d, *J* = 6.6 Hz, 4H).

<sup>13</sup>C NMR (126 MHz, CDCl<sub>3</sub>, mixture of diastereomers and rotamers) δ 172.9, 172.8, 171.5,  
170.7, 170.5, 170.4, 170.2, 170.1, 169.9, 169.7, 168.7, 168.1, 156.8, 156.7, 155.4, 155.3, 155.2,  
144.5, 144.3, 144.2, 143.9, 143.8, 143.6, 143.5, 141.3, 138.5, 138.3, 137.1, 132.9, 132.2, 132.1,  
131.6, 130.7, 130.6, 130.5, 130.2, 130.1, 129.9, 129.7, 129.6, 129.5, 129.3, 128.8, 128.5, 128.2,  
128.1, 128.0, 127.9, 127.8, 127.6, 127.5, 127.2, 127.1, 127.0, 126.9, 126.8, 126.3, 126.1, 126.0,  
125.3, 125.2, 120.1, 120.0, 68.0, 67.8, 67.6, 67.5, 67.4, 67.4, 67.2, 67.1, 67.0, 66.7, 59.1, 58.5,  
56.1, 55.5, 52.6, 52.5, 52.4, 52.1, 51.9, 51.5, 51.4, 51.3, 51.0, 49.5, 49.3, 47.4, 47.0, 46.8, 46.4,  
45.5, 43.0, 39.3, 39.2, 37.9, 36.7, 36.2, 34.6, 34.2, 34.0, 33.9, 33.5, 33.4, 25.1, 25.0, 24.9, 23.3,  
23.0, 22.7, 22.5, 22.3, 22.2.

HRMS (ESI) calculated for C<sub>73</sub>H<sub>67</sub>Cl<sub>2</sub>N<sub>3</sub>O<sub>6</sub>S<sub>2</sub> [M+H]<sup>+</sup>: 1216.3881; found: 1216.3882.

**(12R)-Methyl 8-((S)-2-(((9H-fluoren-9-yl)methoxy)carbonyl)amino)-3-(tritylthio)propanoyl)-9-isopropyl-2,2-dimethyl-4,10-dioxo-12-((tritylthio)methyl)-3-oxa-5,8,11-triazatridecan-13-oate, 3c**

Procedure A

yield: 63% (0.74 g)

yellow solid, Mp: 94-96 °C

R<sub>f</sub> 0.40 (EtOAc/ PE, 30:70)

dr ratio: 3:1.7

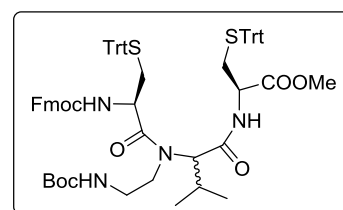

<sup>1</sup>H NMR (500 MHz, CDCl<sub>3</sub>, mixture of diastereomers and rotamers) δ 7.85 – 7.75 (m, 5H), 7.73 – 7.61 (m, 4H), 7.58 – 7.05 (m, 107H), 5.65 – 5.47 (m, 2H), 5.45 – 5.39 (m, 1H), 5.31 (br, s, 0.5H), 5.30 – 5.26 (m, 1H), 5.25 (br, s, 1H), 4.78 – 4.50 (m, 3H), 4.50 – 4.36 (m, 4H), 4.33 (dd, *J* = 23.2, 5.1 Hz, 1H), 4.30 – 4.11 (m, 5H), 4.14 – 4.00 (m, 1H), 3.65 (s, 1H), 3.64 (s, 3H), 3.60 (s, 1H), 3.58 (s, 3H), 3.55 (d, *J* = 5.9 Hz, 1H), 3.51 – 3.17 (m, 8H), 3.16 – 2.74 (m, 10H), 2.68 – 2.42 (m, 2H), 2.42 – 2.26 (m, 1H), 1.52 (s, 9H), 1.49 (s, 3H), 1.46 (s, 9H), 1.43 (s, 3H), 1.03 (d, *J* = 11.7, 3H), 1.00 (d, *J* = 6.4 Hz, 3H), 0.88 (d, *J* = 6.3 Hz, 2H), 0.84 (d, *J* = 6.4 Hz, 1H), 0.76 – 0.72 (m, 6H).

<sup>13</sup>C NMR (126 MHz, CDCl<sub>3</sub>) δ <sup>13</sup>C NMR (126 MHz, CDCl<sub>3</sub>, mixture of diastereomers and rotamers) δ 173.0, 172.6, 172.3, 172.1, 171.1, 170.8, 170.5, 170.1, 168.5, 168.4, 156.9, 156.8, 155.9, 155.8, 155.6, 155.5, 144.6, 144.5, 144.4, 144.3, 144.1, 144.0, 143.9, 143.9, 143.7, 143.5, 141.4, 141.3, 129.7, 129.6, 129.5, 128.1, 128.0, 127.9, 127.8, 127.7, 127.3, 127.2, 127.1, 127.0, 126.9, 126.7, 125.3, 125.2, 125.1, 120.1, 120.0, 79.3, 79.2, 78.9, 67.8, 67.4, 67.3, 67.1, 66.8, 66.4, 66.2, 52.5, 52.4, 52.1, 51.6, 51.3, 50.9, 49.4, 49.3, 47.2, 47.1, 47.0, 43.5, 40.3, 40.1, 39.8, 39.7, 39.5, 34.8, 34.5, 34.2, 34.1, 34.0, 33.7, 33.5, 33.2, 28.6, 28.5, 27.3, 27.2, 26.6, 26.4, 25.7, 20.0, 19.9, 19.7, 19.5, 19.2, 19.2, 19.1, 18.9, 18.8.

HRMS (ESI) calculated for C<sub>72</sub>H<sub>74</sub>N<sub>4</sub>O<sub>8</sub>S<sub>2</sub> [M+H]<sup>+</sup>: 1187.5099; found: 1187.5094.

**(5*R*,11*R*)-Methyl 1-(9*H*-fluoren-9-yl)-8-isobutyl-3,6,9-trioxo-7-phenethyl-5,11-bis((tritylthio) methyl) -2-oxa-4,7,10-triazadodecan-12-oate, 3d**

Procedure A

yield: 65% (0.75 g)

pale yellow solid, Mp: 94-96 °C

R<sub>f</sub> 0.40 (EtOAc/ PE, 30:70)

dr ratio: 3:2

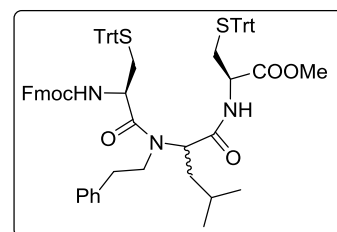

<sup>1</sup>H NMR (500 MHz, CDCl<sub>3</sub>, mixture of diastereomers and rotamers) δ 7.81– 7.53 (m, 9H) 7.51 – 7.13 (m, 106H), 6.72 (t, *J* = 15.3 Hz, 1H), 5.64 – 5.50 (m, 1H), 5.41 – 5.29 (m, 1H), 5.29 – 5.19 (m, 1H), 5.11 (d, *J* = 7.7 Hz, 1H), 4.80 – 4.62 (m, 4H), 4.49 – 4.39 (m, 1H), 4.34 (ddd, *J* = 9.8, 9.2, 3.7 Hz, 3H), 4.29 – 4.18 (m, 5H), 3.55 (s, 2H), 3.51 (s, 1H), 3.45 (s, 1H), 3.43 (s, 3H), 3.30 (d, *J* = 11.2 Hz, 1H), 3.24 – 3.10 (m, 3H), 2.84 – 2.76 (m, 2H), 2.69 – 2.47 (m, 3H), 2.13 – 2.02 (m, 9H), 1.93 (ddd, *J* = 18.1, 11.2, 4.7 Hz, 1H), 1.79 – 1.65 (m, 4H), 1.53 (td, *J* = 13.4, 6.8 Hz, 3H), 0.97 (dd, *J* = 5.8, 3.6 Hz, 4H), 0.97 – 0.95 (m, 6H), 0.94 (d, *J* = 8.7 Hz, 3H), 0.89 (d, *J* = 6.5 Hz, 3H).

<sup>13</sup>C NMR (126 MHz, CDCl<sub>3</sub>, mixture of diastereomers and rotamers) δ 172.8, 172.1, 170.7, 170.6, 170.5, 170.4, 170.3, 170.2, 168.9, 168.6, 156.8, 156.7, 155.7, 155.6, 155.3, 144.4, 144.2, 144.1, 143.9, 143.8, 143.7, 143.6, 143.5, 141.3, 141.2, 139.4, 139.3, 137.9, 137.7, 137.6, 130.6, 129.6, 129.5, 129.4, 129.0, 128.9, 128.7, 128.4, 128.2, 128.1, 128.0, 127.8, 127.6, 127.2, 127.1, 127.0, 126.9, 126.8, 126.7, 126.2, 125.3, 125.2, 125.1, 120.0, 119.9, 67.7, 67.5, 67.4, 67.2, 67.1, 67.0, 66.9, 66.8, 58.5, 58.3, 54.4, 52.4, 52.3, 52.2, 52.1, 51.9, 51.7, 51.3, 51.2, 51.1, 50.9, 50.6, 49.3, 49.2, 47.1, 46.2, 46.0, 45.8, 38.8, 38.7, 37.4, 36.9, 36.8, 36.7, 36.4, 36.0, 35.0, 34.9, 34.7, 34.3, 34.0, 33.9, 33.6, 33.6, 33.3, 29.7, 25.0, 24.9, 24.8, 24.5, 23.2, 23.1, 22.6, 22.6, 22.5, 22.0.

HRMS (ESI) calculated for C<sub>74</sub>H<sub>71</sub>N<sub>3</sub>O<sub>6</sub>S<sub>2</sub> [M+Na]<sup>+</sup>: 1184.4682; found: 1184.4687.



**(5R,11R)-methyl 1-(9H-fluoren-9-yl)-3,6,9-trioxo-7-propyl-5,11-bis((tritylthio)methyl)-2-oxa-4,7,10-triazadodecan-12-oate, 3e**

Procedure A

yield: 60% (0.62 g)

pale yellow solid, Mp: 115-117 °C

R<sub>f</sub> 0.25 (EtOAc/ PE, 30:70)

dr ratio: 3:0

<sup>1</sup>H NMR (500 MHz, CDCl<sub>3</sub>, mixture of rotamers) δ 7.88 – 7.73 (m, 3H), 7.66 – 7.56 (m, 3H), 7.49 – 7.15 (m, 53H), 6.94 (d, *J* = 8.1 Hz, 1H), 5.47 (d, *J* = 21.2, 8.2 Hz, 1H), 5.30 (d, *J* = 10.2 Hz, 0.26H), 4.53 (dd, *J* = 14.0, 7.4 Hz, 1H), 4.44 – 4.36 (m, 2H), 4.36 – 4.25 (m, 3H), 4.21 (dd, *J* = 14.5, 7.4 Hz, 1H), 4.18 – 4.10 (s, 0.28H), 4.03 (s, 2H), 3.62 (s, 1H), 3.54 (s, 3H), 3.27 – 3.13 (m, 1H), 3.13 – 3.02 (m, 1H), 2.77 – 2.56 (m, 6H), 1.58 (ddd, *J* = 25.8, 12.8, 6.2 Hz, 1H), 1.54 – 1.44 (m, 1H), 0.99 – 0.89 (d, *J* = 9.1 Hz, 1H), 0.85 (d, *J* = 10.8 Hz, 3H).

<sup>13</sup>C NMR (126 MHz, CDCl<sub>3</sub>, mixture of rotamers) δ 171.5, 170.8, 170.5, 170.4, 168.4, 167.6, 156.4, 155.8, 144.4, 144.3, 144.3, 144.0, 143.9, 143.7, 141.3, 129.6, 129.6, 129.5, 128.2, 128.1, 128.0, 127.8, 127.7, 127.2, 127.1, 127.0, 127.0, 126.9, 126.9, 125.3, 125.2, 120.0, 120.0, 77.0, 67.7, 67.5, 67.4, 67.2, 66.9, 52.5, 52.4, 51.9, 51.3, 50.8, 50.8, 50.5, 50.2, 49.2, 47.0, 34.4, 33.6, 33.2, 29.7, 23.9, 22.8, 22.0, 20.2, 14.2, 11.2, 11.1.

HRMS (ESI) calculated for C<sub>65</sub>H<sub>61</sub>N<sub>3</sub>O<sub>6</sub>S<sub>2</sub> [M+H]<sup>+</sup>: 1044.4001; found: 1044.4001.

**(5R,11R)-methyl 1-(9H-fluoren-9-yl)-8-isopropyl-7-methyl-3,6,9-trioxo-5,11-bis((tritylthio)methyl)-2-oxa-4,7,10-triazadodecan-12-oate, 3f**

Procedure A

yield: 40% (0.42 g)

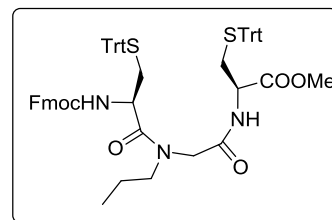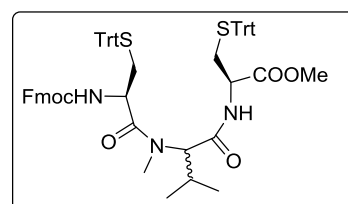

pale yellow solid, Mp: 91-93 °C

R<sub>f</sub> 0.42 (EtOAc/ PE, 30:70)

dr ratio: 3.8:2

<sup>1</sup>H NMR (500 MHz, CDCl<sub>3</sub>, mixture of diastereomers and rotamers) δ 7.85 – 7.76 (m, 6H), 7.68 – 7.59 (m, 6H), 7.53 – 7.39 (m, 46H), 7.38 – 7.15 (m, 68H), 6.64 – 6.51 (m, 1H), 6.47 (d, *J* = 8.0 Hz, 1H), 4.59 (d, *J* = 11.0 Hz, 1H), 4.54 – 4.48 (m, 5H), 4.45 (dd, *J* = 10.5, 7.1 Hz, 1H), 4.42 – 4.35 (m, 4H), 4.35 – 4.19 (dd, *J* = 10.0, 6.9 Hz, 2H), 3.66 (s, 2H), 3.64 (s, 3H), 3.51 (s, 2H), 3.48 (s, 4H), 3.45 (dd, *J* = 12.4, 5.1 Hz, 1H), 2.81 (d, *J* = 2.6 Hz, 2H), 2.73 (d, *J* = 6.9 Hz, 2H), 2.72 – 2.68 (m, 2H), 2.67 – 2.62 (m, 4H), 2.45 – 2.33 (m, 1H), 2.31 – 2.17 (m, 2H), 1.05 – 0.94 (m, 9H), 0.85 – 0.75 (m, 6H), 0.70 (dd, *J* = 10.7, 6.9 Hz, 3H).

<sup>13</sup>C NMR (126 MHz, CDCl<sub>3</sub>, mixture of diastereomers and rotamers) δ 172.2, 172.0, 171.3, 171.2, 170.6, 170.5, 170.3, 170.1, 169.5, 169.4, 169.2, 168.1, 156.9, 156.8, 155.7, 155.5, 144.6, 144.5, 144.4, 144.3, 144.0, 143.9, 143.7, 143.6, 143.4, 141.4, 141.3, 129.8, 129.7, 129.6, 129.5, 129.4, 128.2, 128.1, 128.0, 127.9, 127.8, 127.7, 127.2, 127.1, 127.0, 126.9, 126.8, 125.3, 125.2, 125.1, 120.0, 67.7, 67.4, 67.3, 67.1, 67.1, 67.0, 66.9, 66.2, 66.1, 62.3, 52.5, 52.4, 52.3, 52.0, 51.9, 51.8, 51.6, 51.0, 50.9, 50.7, 50.5, 49.1, 49.0, 47.2, 47.1, 47.0, 34.7, 34.5, 34.2, 34.1, 34.0, 33.7, 33.5, 33.4, 31.4, 30.9, 30.4, 30.1, 29.2, 29.1, 26.5, 26.4, 26.1, 25.9, 25.3, 25.1, 19.8, 19.7, 18.8, 18.7, 18.6, 18.3.

HRMS (ESI) calculated for C<sub>66</sub>H<sub>63</sub>N<sub>3</sub>O<sub>6</sub>S<sub>2</sub> [M+H]<sup>+</sup>: 1058.4158; found: 1058.4157.

**(5*R*,11*R*)-methyl 7-allyl-8-benzyl-1-(9*H*-fluoren-9-yl)-3,6,9-trioxo-5,11-bis((tritylthio)methyl)-2-oxa-4,7,10-triazadodecan-12-oate, 3g**

Procedure A

yield: 56% (0.63 g)

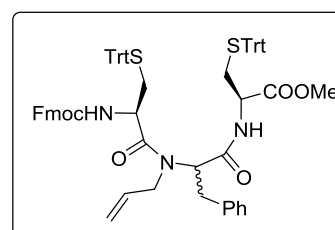

pale yellow solid, Mp: 80-82 °C

R<sub>f</sub> 0.60 (EtOAc/ PE, 30:70)

dr ratio: 3:3

<sup>1</sup>H NMR (500 MHz, CDCl<sub>3</sub>, mixture of diastereomers and rotamers) δ 7.59 – 7.55 (m, 15H), 7.54 – 7.39 (m, 15H), 7.38 – 7.11 (m, 94H), 6.15 (d, *J* = 5.4 Hz, 0.5H), 6.11(d, *J* = 4.4 Hz, 1.5H), 5.93 (d, *J* = 8.0 Hz, 1H), 5.81 – 5.76 (m, 1.5H), 5.71 – 5.63 (m, 2H), 5.15 – 5.10 (m, 1H), 5.09 – 4.97 (m, 3H), 4.92 (ddd, *J* = 39.0, 7.4, 1.5 Hz, 2H), 4.78 – 4.77 (ddt, *J* = 16.2, 10.1, 6.0 Hz, 2H), 4.76 – 4.66 (m, 5H), 4.65 – 4.58b (dt, *J* = 8.0, 5.2 Hz, 1H), 4.57 – 4.55 (m, 4H), 4.52 – 4.43 (m, 1H), 4.20 – 4.15 (m, 2H), 4.14 – 4.10 (m, 2H), 4.19 – 3.99 (m, 2H), 3.77 (s, 2H), 3.75 (s, 2H), 3.73 (s, 3H), 3.69 (s, 3H), 3.35 – 3.20 ((m, 8H), 3.18 – 3.11 (m, 5H), 3.09 – 2.96 (m, 6H).

<sup>13</sup>C NMR (126 MHz, CDCl<sub>3</sub>, mixture of diastereomers and rotamers) δ 172.4, 172.1, 171.6, 171.4, 170.5, 168.8, 168.5, 157.4, 157.3, 156.3, 156.0, 144.8, 144.3, 141.0, 135.4, 132.8, 130.8, 130.7, 130.1, 129.6, 129.5, 128.8, 128.4, 128.0, 127.9, 126.0, 125.1, 122.7, 119.9, 119.2, 116.7, 70.6, 67.6, 63.1, 61.2, 57.3, 56.2, 55.5, 52.2, 51.3, 47.0, 41.9, 41.5, 40.6, 36.3, 35.7, 35.6, 35.05, 34.7, 33.2, 33.0, 28.4, 27.8, 26.8.

HRMS (ESI) calculated for C<sub>72</sub>H<sub>65</sub>N<sub>3</sub>O<sub>6</sub>S<sub>2</sub> [M+H]<sup>+</sup>: 1132.4330; found: 1132.4330.

**(5*R*,11*R*)-methyl 1-(9*H*-fluoren-9-yl)-3,6,9-trioxo-7-trityl-5,11-bis((tritylthio)methyl)-2-oxa-4,7,10-triazadodecan-12-oate, 3h**

Procedure A

yield: 50% (0.62 g)

pale yellow solid, Mp: 110-112 °C

R<sub>f</sub> 0.35 (EtOAc/ PE, 20:80)

dr ratio: 3:0

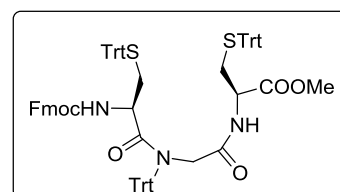

NMR (500 MHz, CDCl<sub>3</sub>, mixture of rotamers) δ 7.79 (dt, *J* = 7.6, 3.6 Hz, 4H), 7.57 (t, *J* = 7.5 Hz, 4H), 7.49 – 7.34 (m, 17H), 7.31 – 7.19 (m, 46H), 5.43 (d, *J* = 5.6 Hz, 0.35H), 5.31 (d, *J* = 6.5 Hz, 1H), 4.51– 4.46 (m, 1H), 4.32 – 4.20 (m, 4H), 4.18 – 4.10 (m, 4H), 3.81 (s, 0.8H), 3.79 (s, 2H), 3.55 (s, 1H), 3.52 (s, 3H), 2.61 (dt, *J* = 12.5, 6.4 Hz, 3H), 2.30 – 2.15 (m, 3H).

<sup>13</sup>C NMR (126 MHz, CDCl<sub>3</sub>, mixture of rotamers) δ 169.71, 169.32, 167.82, 167.37, 152.46, 151.35, 145.06, 144.43, 143.67, 142.53, 141.27, 141.08, 129.69, 129.60, 129.45, 128.47, 127.99, 127.92, 127.85, 127.10, 126.69, 126.60, 126.48, 125.16, 124.93, 120.01, 70.73, 67.85, 57.01, 55.24, 53.02, 46.58, 32.35, 31.95, 30.90, 29.73, 29.39, 23.85, 22.72.

HRMS (ESI) calculated for C<sub>81</sub>H<sub>69</sub>N<sub>3</sub>O<sub>6</sub>S<sub>2</sub> [M+H]<sup>+</sup>: 1244.5610; found: 1244.5617.

**(5*R*,14*R*)-methyl 10-benzyl-1-(9*H*-fluoren-9-yl)-11-isobutyl-3,6,9,12-tetraoxo-5,14-bis((tritylthio)methyl)-2-oxa-4,7,10,13-tetraazapentadecan-15-oate, 3i**

Procedure A

yield: 72% (0.86 g)

pale yellow solid, Mp: 70-72 °C

R<sub>f</sub> 0.22 (EtOAc/ PE, 30:70)

dr ratio: 3:2.7

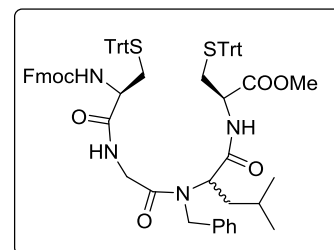

<sup>1</sup>H NMR (500 MHz, CDCl<sub>3</sub>, mixture of diastereomers and rotamers) δ 7.78 – 7.12 (m, 135H) 6.81 – 6.66 (m, 6H), 6.60 (d, *J* = 8.5 Hz, 1H), 4.60 – 4.48 (m, 4H), 4.48 (d, *J* = 7.1 Hz, 2H), 4.43 – 4.40 (m, 4H), 4.28 (ddd, *J* = 18.1, 12.8, 9.2 Hz, 4H), 4.19 (dt, *J* = 18.4, 12.1 Hz, 2H), 4.18 – 4.15 (m, 2H), 3.91 – 3.78 (m, 8H), 3.67 (s, 2H), 3.66 (s, 3H), 3.64 (s, 3H), 3.61 (s, 2H), 2.70 – 2.51 (m, 7H), 1.91 – 1.79 (m, 4H), 1.35 – 1.20 (m, 4H), 1.01 – 0.96 (m, 5H), 0.95 – 0.90 (m, 4H), 0.89 – 0.85 (m, 4H), 0.84 – 0.77 (m, 7H).

<sup>13</sup>C NMR (126 MHz, CDCl<sub>3</sub>) (major diastereomer) δ 172.2, 170.1, 170.0, 169.8, 168.6, 164.5, 163.7, 157.0, 144.3, 141.3, 133.9, 133.3, 131.9, 129.9, 129.6, 128.9, 128.1, 128.0, 127.7, 127.1,

127.0, 126.9, 126.5, 125.8, 125.1, 120.0, 119.6, 70.2, 70.1, 67.2, 66.8, 62.3, 61.7, 56.7, 53.8, 51.6, 50.5, 48.9, 47.1, 46.3, 42.0, 41.0, 40.6, 37.2, 35.4, 34.4, 33.9, 33.2, 29.7, 27.8, 27.4, 25.6, 25.2, 22.7, 22.2, 22.0.

HRMS (ESI) calculated for  $C_{75}H_{72}N_4O_7S_2$   $[M+H]^+$ : 1205.5267; found: 1205.5269.

**(R)-Methyl 1-(9H-fluoren-9-yl)-3,6,9-trioxo-7-(2-(tritylthio)ethyl)-11-((tritylthio)methyl)-2-oxa-4,7,10-triazadodecan-12-oate, 3j**

Procedure B

yield: 65% (0.65 g)

white solid, Mp: 96-98 °C

$R_f$  0.30 (EtOAc/ PE, 30:70)

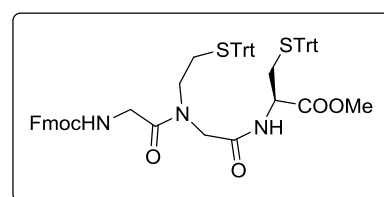

$^1H$  NMR (500 MHz,  $CDCl_3$ , mixture of rotamers)  $\delta$  7.80 (d,  $J = 7.6$  Hz, 3H), 7.64 (dd,  $J = 7.8, 2.8$  Hz, 2H), 7.52 – 7.37 (m, 20H), 7.37 – 7.21 (m, 45H), 6.54 (d,  $J = 7.8$  Hz, 1H), 6.25 (d,  $J = 12.2$  Hz, 0.3H), 5.75 (d,  $J = 5.5$  Hz, 0.4H), 5.74 (d,  $J = 4.5$  Hz, 1H), 4.51 – 4.46 (m, 2H), 4.45 – 4.32 (m, 3H), 4.25 (t,  $J = 7.2$  Hz, 1H), 3.87 (s, 1H), 3.86 (s, 2H), 3.77 (d,  $J = 4.5$  Hz, 0.6H), 3.75 (d,  $J = 6.4$  Hz, 2H), 3.75 (s, 2H), 3.69 (s, 3H), 3.55 – 3.49 (m, 2H), 3.15 (t,  $J = 7.3$  Hz, 1H), 3.11 (t,  $J = 11.4$  Hz, 2H), 2.73 – 2.70 (m, 2.6H), 2.57 – 2.51 (m, 1.6H).

$^{13}C$  NMR (126 MHz,  $CDCl_3$ )  $\delta$  170.4, 170.1, 169.0, 167.4, 166.9, 156.0, 144.5, 144.3, 144.1, 143.2, 141.2, 129.5, 129.4, 129.3, 128.0, 127.9, 127.8, 127.6, 127.0, 126.0, 126.6, 125.1, 119.8, 67.8, 67.3, 57.7, 55.8, 51.4, 51.2, 50.4, 49.6, 47.5, 47.3, 42.4, 33.5, 33.4, 33.1, 29.7, 29.4.

HRMS (ESI) calculated for  $C_{63}H_{57}N_3O_6S_2$   $[M+Na]^+$ : 1038.3586; found: 1038.3587.

**(11R)-Methyl 7-benzyl-1-(9H-fluoren-9-yl)-3,6,9-trioxo-8,11-bis((tritylthio)methyl)-2-oxa-4,7,10-triazadodecan-12-oate, 3k**

Procedure B

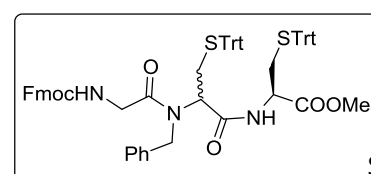

yield: 45% (0.49 g)

white solid, Mp: 115-117 °C

R<sub>f</sub> 0.40 (EtOAc/ PE, 30:70)

dr ratio: 3:2.5

<sup>1</sup>H NMR (500 MHz, CDCl<sub>3</sub>, mixture of diastereomers and rotamers) δ 7.80 (d, *J* = 7.5 Hz, 4H), 7.62 (dd, *J* = 18.2, 7.6 Hz, 5H), 7.49 – 7.18 (m, 119H), 7.06 – 6.97 (m, 5H), 6.52 (d, *J* = 8.0 Hz, 1H), 6.50 (d, *J* = 8.0 Hz, 1H), 5.70 (dd, *J* = 9.9, 6.2 Hz, 2H), 4.44 – 4.37 (m, 5H), 4.34 – 4.26 (m, 5H), 4.25 – 4.19 (m, 5H), 4.03 (d, *J* = 4.5 Hz, 2H), 3.97 (d, *J* = 8.8 Hz, 2H), 3.69 (s, 3H), 3.67 (s, 3H), 2.87 (dt, *J* = 13.7, 6.9 Hz, 2.5H), 2.77 (dt, *J* = 12.1, 6.0 Hz, 2H), 2.61 – 2.49 (m, 5H).

<sup>13</sup>C NMR (126 MHz, CDCl<sub>3</sub>, mixture of diastereomers and rotamers) δ 170.7, 170.5, 169.6, 168.5, 156.6, 156.1, 155.8, 144.3, 144.2, 143.9, 143.6, 141.3, 135.5, 135.2, 129.5, 129.4, 129.3, 129.2, 129.0, 128.8, 128.1, 128.0, 127.9, 127.7, 127.6, 127.4, 127.1, 126.9, 126.5, 126.3, 125.2, 124.2, 120.0, 119.1, 67.3, 66.8, 66.5, 65.9, 58.2, 57.9, 57.3, 52.6, 52.2, 51.2, 50.0, 48.6, 46.8, 46.7, 43.0, 33.4, 33.3, 29.6, 29.5.

HRMS (ESI) calculated for C<sub>69</sub>H<sub>61</sub>N<sub>3</sub>O<sub>6</sub>S<sub>2</sub> [M+Na]<sup>+</sup>: 1114.3899; found: 1114.3900.

**(R)-Methyl 1-(9H-fluoren-9-yl)-3,6,9-trioxo-7-(2-(tritylthio)ethyl)-5-((tritylthio)methyl)-2-oxa-4,7,10-triazadodecan-12-oate, 3l**

Procedure B

yield: 70% (0.71 g)

white solid, Mp: 89-91 °C

R<sub>f</sub> 0.35 (EtOAc/ PE, 30:70)

<sup>1</sup>H NMR (500 MHz, CDCl<sub>3</sub>, mixture of rotamers) δ 7.81 (td, *J* = 10.4, 9.0, 5.7 Hz, 2H), 7.79 (dd, *J* = 12.2, 8.0 Hz, 2H), 7.71 – 7.54 (m, 26H), 7.56 – 7.30 (m, 30H), 7.02 (d, *J* = 7.0 Hz, 0.5H), 5.54 (d, *J* = 7.3 Hz, 1H), 5.54 (d, *J* = 9.3 Hz, 0.5H), 4.45 – 4.40 (m, 1.5H), 4.38 – 4.35 (m, 2.5H), 4.28 (t,

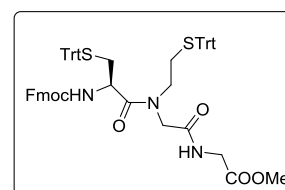

$J=8.5$  Hz, 0.5H), 4.25 (t,  $J = 12.5$ Hz, 1H), 3.81 (d,  $J = 5.4$  Hz, 0.8H), 3.78 (d,  $J = 4.0$  Hz, 2H), 3.77 (s, 0.7H), 3.76 (s, 2H), 3.66 (s, 1.5H), 3.65 (s, 3H), 3.18 (t,  $J = 6.7$  Hz, 0.7H), 3.16 (t,  $J = 8.0$  Hz, 2H), 2.81 (dd,  $J = 11.0, 3.5$  Hz, 0.5H), 2.77 (dd,  $J = 12.0, 6.5$  Hz, 0.7H), 2.49 (dd,  $J = 18.0, 8.5$  Hz, 1H), 2.38 (dd,  $J = 12.5, 6.9$  Hz, 1H).

$^{13}\text{C}$  NMR (126 MHz,  $\text{CDCl}_3$ , mixture of rotamers)  $\delta$  171.5, 171.1, 169.8, 169.5, 161.3, 155.7, 155.2, 144.7, 144.5, 144.3, 143.8, 143.7, 143.5, 141.3, 141.0, 129.9, 129.8, 129.6, 129.5, 129.3, 128.2, 128.0, 127.8, 127.5, 127.2, 127.1, 126.9, 126.8, 125.3, 125.2, 125.1, 120.1, 120.0, 119.8, 67.5, 67.4, 67.2, 67.1, 64.4, 60.5, 53.6, 53.4, 52.3, 52.1, 50.1, 50.0, 49.5, 48.6, 47.2, 47.0, 40.6, 37.0, 34.6, 34.4, 30.2, 29.8, 29.1, 21.1.

HRMS (ESI) calculated for  $\text{C}_{63}\text{H}_{57}\text{N}_3\text{O}_6\text{S}_2$   $[\text{M}+\text{H}]^+$ : 1016.2731; found: 1016.2732.

**Methyl 1-(9H-fluoren-9-yl)-3,6,9-trioxo-7,8-bis(2-(tritylthio)ethyl)-2-oxa-4,7,10-triazadodecan-12-oate, 3m**

Procedure B

yield: 52% (0.53 g)

white solid, Mp: 79-81 °C

$R_f$  0.40 (EtOAc/ PE, 30:70)

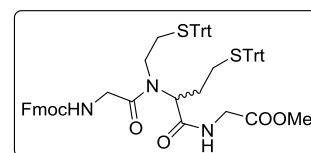

$^1\text{H}$  NMR (500 MHz,  $\text{CDCl}_3$ , mixture of rotamers)  $\delta$  7.80 (d,  $J = 7.5$  Hz, 2H), 7.78 (d,  $J = 12.5$  Hz, 2H) 7.65 – 7.38 (m, 17H), 7.36 – 7.13 (m, 52H), 6.70 (d,  $J = 5.6$  Hz, 1H), 5.60 (d,  $J = 4.6$  Hz, 1H), 4.45 (d,  $J = 6.7$  Hz, 2H), 4.43 (d,  $J = 8.1$  Hz, 2H), 4.25 (t,  $J = 12.6$  Hz, 1H), 4.23 (t,  $J = 9.4$  Hz, 1H), 4.15 – 3.98 (m, 2H), 3.97 (d,  $J = 12.4$  Hz, 1.5H), 3.95 (d,  $J = 8.4$  Hz, 2H), 3.91 (d,  $J = 16.4$  Hz, 2H), 3.88 (d,  $J = 6.5$  Hz, 1H), 3.75 (s, 3H), 3.69 (s, 3H), 3.24 (t,  $J = 18.2$  Hz, 2H), 3.22 (t,  $J = 16.4$  Hz, 2H), 2.81 – 2.69 (m, 4H), 2.46 (d,  $J = 12.1$  Hz, 2H), 2.43 (d,  $J = 6.7$  Hz, 2H), 2.05 (dt,  $J = 12.3, 7.3$  Hz, 2H), 1.97 (dt,  $J = 12.5, 6.8$  Hz, 2H).

<sup>13</sup>C NMR (126 MHz, CDCl<sub>3</sub>, mixture of rotamers) δ 170.2, 169.8, 169.5, 169.1, 164.3, 156.0, 144.8, 144.6, 143.9, 141.3, 129.6, 129.5, 129.3, 128.5, 128.0, 127.9, 127.7, 127.0, 126.8, 126.7, 126.6, 125.1, 120.0, 67.5, 67.1, 66.8, 62.1, 61.6, 52.3, 51.8, 47.1, 45.2, 42.9, 41.9, 41.0, 40.3, 30.4, 29.1, 28.1, 27.5, 26.5, 26.0.

HRMS (ESI) calculated for C<sub>64</sub>H<sub>59</sub>N<sub>3</sub>O<sub>6</sub>S<sub>2</sub> [M+Na]<sup>+</sup>: 1052.3743; found: 1052.3741.

**(5R)-Methyl 7-benzyl-1-(9H-fluoren-9-yl)-3,6,9-trioxo-5,8-bis((tritylthio)methyl)-2-oxa-4,7,10-triazadodecan-12-oate, 3n**

Procedure B

yield: 40% (0.43 g)

white foam, Mp: 69-71 °C

R<sub>f</sub> 0.35 (EtOAc/ PE, 30:70)

dr ratio: 3:2.7

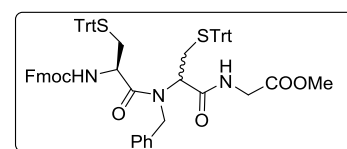

<sup>1</sup>H NMR (500 MHz, CDCl<sub>3</sub>, mixture of diastereomers and rotamers) δ 7.81 – 7.79 (m, 5H), 7.74 – 7.63 (m, 7H), 7.73 – 7.11 (m, 130H), 5.48 (d, *J* = 8.2 Hz, 2H), 4.63 (t, *J* = 12.2 Hz, 1H), 4.52 (dt, *J* = 18.2, 8.6 Hz, 1.6H), 4.51 – 4.34 (m, 7H), 4.30 – 4.23 (m, 4H), 4.22 (d, *J* = 6.2 Hz, 2H), 4.20 (d, *J* = 8.4 Hz, 1.3 Hz), 3.97 – 3.83 (m, 3H) 3.67 (s, 1.5H), 3.65 (s, 1.5H), 3.63 (s, 3H), 3.60 (s, 2.8H), 2.80 – 2.77 (m, 2H), 2.76 – 2.73 (m, 0.8H), 2.70 – 2.66 (m, 1.5H), 2.65 – 2.58 (m, 2H).

<sup>13</sup>C NMR (126 MHz, CDCl<sub>3</sub>, mixture of diastereomers and rotamers) δ 172.5, 172.3, 171.7, 169.9, 169.6, 169.4, 169.0, 168.8, 168.0, 156.7, 155.6, 155.5, 144.5, 144.4, 144.3, 144.1, 143.8, 143.7, 143.6, 141.3, 141.2, 137.2, 135.8, 135.4, 129.7, 129.6, 129.5, 129.3, 128.9, 128.6, 128.2, 128.1, 127.9, 127.8, 127.7, 127.4, 127.1, 127.1, 127.0, 126.9, 126.7, 125.3, 125.1, 120.1, 119.9, 119.8, 67.4, 67.3, 67.2, 59.3, 57.4, 52.1, 51.9, 51.2, 51.0, 49.0, 48.8, 47.1, 47.0, 40.9, 40.8, 34.7, 34.2, 33.6, 30.5, 30.3, 29.6.

HRMS (ESI) calculated for C<sub>69</sub>H<sub>61</sub>N<sub>3</sub>O<sub>6</sub>S<sub>2</sub> [M+H]<sup>+</sup>: 1092.3691; found: 1092.3694.



**N<sub>1</sub>-Methyl-N<sub>1</sub>-(4-methyl-1-oxo-1-((2-(tritylthio)ethyl)amino)pentan-2-yl)-N<sub>4</sub>-(2-(tritylthio) ethyl) succinamide, 3o**

Procedure A

yield: 80% (0.67 g)

white solid, Mp: 89 – 91 °C

R<sub>f</sub> 0.35 (EtOAc/ PE, 30:70)

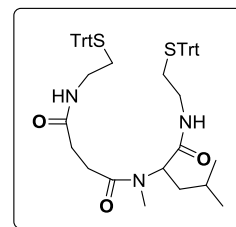

<sup>1</sup>H NMR (500 MHz, CDCl<sub>3</sub>, mixture of rotamers) δ 7.52 – 7.37 (m, 11H), 7.37 – 7.14 (m, 26H), 6.52 (t, *J* = 5.9 Hz, 1H), 5.72 (d, *J* = 6.3 Hz, 1H), 5.13 (dd, *J* = 9.9, 5.7 Hz, 1H), 3.17 – 3.08 (m, 2H), 3.06 – 3.02 (m, 1H), 3.00 – 2.90 (m, 2H), 2.87 (s, 3H), 2.69 – 2.58 (m, 1H), 2.54 – 2.50 (m, 1H), 2.50 – 2.45 (m, 2H), 2.45 – 2.40 (m, 2H), 2.33 (dt, *J* = 12.8, 6.7 Hz, 2H), 1.63 – 1.55 (m, 2H), 1.48 – 1.36 (m, 2H), 0.94 (d, *J* = 6.6 Hz, 3H), 0.88 (d, *J* = 6.5 Hz, 3H).

<sup>13</sup>C NMR (126 MHz, CDCl<sub>3</sub>, mixture of rotamers) δ 173.3, 171.9, 170.6, 144.8, 144.6, 129.5, 128.1, 127.9, 126.9, 126.8, 126.7, 66.9, 58.8, 38.8, 38.2, 37.0, 36.0, 31.8, 31.3, 28.9, 28.5, 24.9, 23.3, 23.2, 21.9.

HRMS (ESI) calculated for C<sub>53</sub>H<sub>57</sub>N<sub>3</sub>O<sub>3</sub>S<sub>2</sub> [M+H]<sup>+</sup>: 848.1679; found: 848.1679.

**(5*S*,13*R*)-Methyl 1-(9*H*-fluoren-9-yl)-5-(methoxycarbonyl)-3,8,11-trioxo-10,13-bis((tritylthio)methyl)-2-oxa-4,9,12-triazatetradecan-14-oate, 3p**

Procedure B

yield: 21% (0.22 g)

white solid, Mp: 105 – 107 °C

R<sub>f</sub> 0.60 (EtOAc/ PE, 50:50)

Single diastreomer isolated from column purification

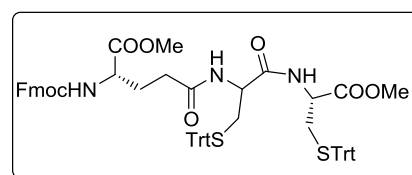

<sup>1</sup>H NMR (500 MHz, CDCl<sub>3</sub>) δ 7.85 – 7.69 (m, 2H), 7.67 – 7.01 (m, 38H), 6.46 (dd, *J* = 19.6, 11.5 Hz, 1H), 6.10 (t, *J* = 13.6 Hz, 1H), 5.66 (dd, *J* = 16.8, 8.0 Hz, 1H), 4.41 – 4.38 (m, 3H) 4.25 (t, *J* =

8.6 Hz, 1H), 4.07 (d,  $J = 11.9$  Hz, 2H), 3.69 (s, 3H), 3.65 (s, 3H), 2.89 – 2.73 (m, 2H), 2.68 – 2.53 (m, 2H), 2.04 (t,  $J = 16.2$  Hz, 2H), 1.93 (t,  $J = 22.2$  Hz, 2H).

$^{13}\text{C}$  NMR (126 MHz,  $\text{CDCl}_3$ )  $\delta$  172.42, 171.76, 170.25, 169.65, 156.24, 144.41, 144.34, 144.32, 144.26, 143.88, 143.70, 141.34, 129.56, 129.52, 129.49, 128.17, 128.12, 128.03, 127.96, 127.93, 127.76, 127.25, 127.14, 126.90, 125.13, 120.02, 67.21, 67.06, 60.43, 53.30, 52.58, 52.56, 52.22, 52.06, 51.46, 47.21, 33.51, 33.35, 32.10, 28.46.

HRMS (ESI) calculated for  $\text{C}_{66}\text{H}_{61}\text{N}_3\text{O}_8\text{S}_2$   $[\text{M}+\text{H}]^+$ : 1088.3358; found: 1088.3558.

**(5*R*,11*R*)-Methyl 1-(9*H*-fluoren-9-yl)-3,6,9-trioxo-7,8-bis(2-(tritylthio)ethyl)-5,11-bis((tritylthio)methyl)-2-oxa-4,7,10-triazadodecan-12-oate, 3q**

Procedure B

yield: 30% (0.48g)

white foam, Mp: 110 – 112 °C

$R_f$  0.42 (EtOAc/ PE, 30:70)

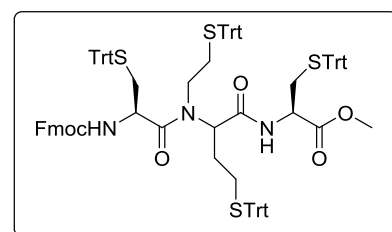

Single diastereomer isolated from column purification

$^1\text{H}$  NMR (500 MHz,  $\text{CDCl}_3$ , mixture of rotamers)  $\delta$  7.91 – 7.11 (m, 148H), 7.05 (d,  $J = 12.5$  Hz, 0.8H), 4.81 (d,  $J = 6.4$  Hz, 0.7H), 4.75 (d,  $J = 8.4$  Hz, 0.2H), 4.45 – 4.42 (m, 1.6H), 4.41 – 4.35 (m, 3H), 4.34 – 4.24 (m, 2H), 4.22 – 4.16 (m, 2H), 3.49 (s, 3H), 3.47 (s, 0.7H), 3.15 – 2.98 (m, 2.5H), 2.71 – 2.65 (m, 2.6H), 2.61 – 2.52 (m, 2.5H), 2.49 – 2.37 (m, 2.6H), 2.31 – 2.18 (m, 2.8H), 1.77 – 1.59 (m, 2.8H).

$^{13}\text{C}$  NMR (126 MHz,  $\text{CDCl}_3$ , mixture of rotamers)  $\delta$  171.98, 170.46, 169.26, 155.71, 144.95, 144.84, 144.78, 144.70, 144.59, 144.54, 144.44, 144.37, 144.30, 144.26, 144.07, 143.53, 141.33, 141.23, 129.74, 129.67, 129.63, 129.58, 129.53, 128.19, 128.13, 128.09, 128.02, 127.96, 127.89, 127.77, 127.13, 127.09, 127.01, 126.96, 126.92, 126.86, 126.83, 126.77,

126.63, 126.58, 125.26, 125.09, 125.02, 120.03, 119.99, 77.35, 77.30, 77.10, 76.85, 67.35,  
67.11, 66.81, 52.25, 51.72, 49.78, 47.12, 46.97, 33.74, 33.49, 33.34, 28.67, 27.73.

HRMS (ESI) calculated for  $C_{104}H_{91}N_3O_6S_4$   $[M+H]^+$ : 1607.1118; found: 1607.1113.

## Disulfide Synthesis

To a solution of I<sub>2</sub> (10.0 equiv.) in 10:1 mixture of CH<sub>2</sub>Cl<sub>2</sub>: MeOH (150 mL) was added the Ugi product (1.0 equiv.) previously dissolved in CH<sub>2</sub>Cl<sub>2</sub> (50 mL) dropwise over 10 min. The resulting mixture was stirred for 1 h and cooled then quenched the reaction mixture with saturated aqueous sodium bisulfite. The reaction mixture was concentrated and then partitioned between H<sub>2</sub>O and EtOAc. The organic layer was washed with brine, dried over anhydrous Na<sub>2</sub>SO<sub>4</sub>, filtered and concentrated. The residue was purified by column chromatography on silica gel (MeOH/CH<sub>2</sub>Cl<sub>2</sub>, 5:95).

Note: Diastereomeric ratios are given according to methyl group singlet of the C-terminal ester.

### **(4*R*,10*R*)-Methyl 10-(((9*H*-fluoren-9-yl)methoxy)carbonyl)amino)-8-benzyl-6,9-dioxo-1,2-dithia-5,8-diazacycloundecane-4-carboxylate, 4a**

yield: 82% (0.49 g)

white solid, Mp: 112-114 °C

R<sub>f</sub> 0.41 (MeOH/ CH<sub>2</sub>Cl<sub>2</sub>, 3:97)

dr ratio: 3:0

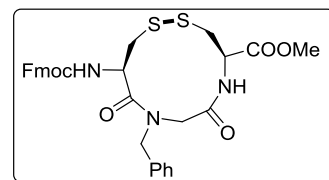

<sup>1</sup>H NMR (500 MHz, CDCl<sub>3</sub>) δ 7.75 – 7.7.11 (m, 13H), 5.31 (br, d, *J* = 6.8 Hz, 1H), 5.15 – 4.86 (m, 1H), 4.81 – 4.68 (m, 1H), 4.42 (t, *J* = 8.2 Hz, 1H), 4.21 (d, *J* = 6.4 Hz, 2H), 4.16 (s, 2H), 3.86 (d, *J* = 12.2 Hz, 2H), 3.61 (s, 3H), 2.81 (dd, *J* = 6.8, 1.1 Hz, 1H), 2.79 (dd, *J* = 11.2, 6.2 Hz, 1H), 2.71 (dd, *J* = 8.5, 2.4 Hz, 1H), 2.65 (dd, *J* = 6.5, 2.5 Hz, 1H).

<sup>13</sup>C NMR (126 MHz, CDCl<sub>3</sub>) δ 169.3, 168.2, 168.0, 156.4, 143.4, 141.0, 135.6, 135.4, 128.7, 128.5, 127.9, 127.9, 127.7, 127.5, 126.9, 126.8, 124.8, 119.7, 77.3, 77.1, 76.8, 67.2, 53.0, 52.6, 52.5, 49.7, 48.8, 48.5, 48.2, 46.8, 40.1, 39.6.

HRMS (ESI) calculated for C<sub>31</sub>H<sub>31</sub>N<sub>3</sub>O<sub>6</sub>S<sub>2</sub> [M+H]<sup>+</sup>: 606.1727; found: 606.1727.

**(4*R*,10*R*)-Methyl 10-((((9*H*-fluoren-9-yl)methoxy)carbonyl)amino)-8-(3,4-dichlorobenzyl)-7-isobutyl-6,9-dioxo-1,2-dithia-5,8-diazacycloundecane-4-carboxylate, 4b**

yield: 75% (0.54 g)

white solid, Mp: 125-127 °C

R<sub>f</sub> 0.60 (MeOH/ CH<sub>2</sub>Cl<sub>2</sub>, 5:95)

dr ratio: 3:2.3

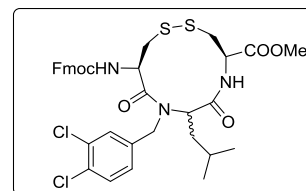

<sup>1</sup>H NMR (500 MHz, CDCl<sub>3</sub>, mixture of diastereomers) δ 7.79 – 7.18 (m, 20H), 7.15 (d, *J* = 7.6 Hz, 1H), 7.11 (d, *J* = 6.6 Hz, 1H), 5.65 (d, *J* = 9.8 Hz, 1H), 5.31 (d, *J* = 11.8 Hz, 1H), 4.93 – 4.91 (m, 1H), 4.89 – 4.86 (m, 2H), 4.82 – 4.66 (m, 4H), 4.65 – 4.29 (m, 7H), 4.22 (d, *J* = 8.6 Hz, 2H), 4.11 (s, 1H), 4.08 (s, 2H), 3.77 (s, 2H), 3.75 (s, 3H), 3.49 – 3.38 (m, 2H), 3.30 – 3.21 (m, 3H), 3.18 – 2.93 (m, 2H), 1.74 – 1.63 (m, 3H), 1.56 – 1.32 (m, 2H), 1.01 – 1.32 (m, 2H), 1.01 – 0.86 (m, 5H), 0.83 (d, *J* = 4.6 Hz, 3H), 0.77 (d, *J* = 6.6 Hz, 3H).

<sup>13</sup>C NMR (126 MHz, CDCl<sub>3</sub>, mixture of diastereomers) δ 172.4, 172.1, 171.0, 170.1, 169.8, 169.6, 169.0, 168.8, 156.5, 155.6, 143.4, 141.3, 139.3, 137.8, 133.2, 132.7, 132.4, 132.0, 131.8, 130.9, 130.7, 130.3, 130.3, 129.0, 127.8, 127.5, 127.1, 126.5, 125.1, 120.2, 120.0, 67.3, 66.2, 60.9, 58.9, 55.8, 54.7, 53.0, 52.3, 51.2, 47.1, 46.9, 41.6, 41.2, 38.2, 36.7, 25.3, 22.9, 22.4, 22.3, 22.1, 21.9, 21.7, 21.5.

HRMS (ESI) calculated for C<sub>35</sub>H<sub>37</sub>Cl<sub>2</sub>N<sub>3</sub>O<sub>6</sub>S<sub>2</sub> [M+H]<sup>+</sup>: 730.1573; found: 730.1575.

**(4*R*,10*R*)-methyl 10-((((9*H*-fluoren-9-yl)methoxy)carbonyl)amino)-8-(2-((tert-butoxycarbonyl)amino)ethyl)-7-isopropyl-6,9-dioxo-1,2-dithia-5,8-diazacycloundecane-4-carboxylate, 4c**

yield: 70% (0.49 g)

white solid, Mp: 110 – 112 °C

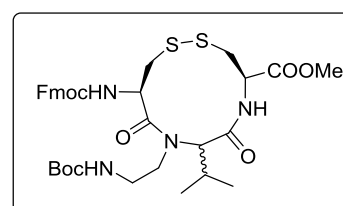

R<sub>f</sub> 0.55 (MeOH/ CH<sub>2</sub>Cl<sub>2</sub>, 5:95)

dr ratio: 3:2.1

<sup>1</sup>H NMR (500 MHz, CDCl<sub>3</sub>, mixture of diastereomers) δ 7.80 (d, *J* = 5.4 Hz, 2H), 7.61 (d, *J* = 7.4 Hz, 2H), 7.51 – 7.12 (m, 13H), 5.69 (br, s, 1.3H), 5.30 – 5.10 (m, 1.5H), 4.94 – 4.82 (m, 1.6H), 4.80 – 4.74 (m, 1.3H), 4.61 – 4.43 (m, 1.6H), 4.40 – 4.25 (m, 3H), 3.77 (s, 3H), 3.75 (s, 2H), 3.71 – 3.70 (m, 2H), 3.65 – 3.32 (m, 3H), 3.24 – 3.12 (m, 2H), 2.91 – 2.81 (m, 1.5H), 1.49 (s, 9H), 1.38 (s, 6H), 1.21 – 1.12 (m, 5H), 1.11 – 0.98 (m, 6H).

<sup>13</sup>C NMR (126 MHz, CDCl<sub>3</sub>, mixture of diastereomers) δ 174.7, 173.1, 172.0, 170.9, 170.7, 170.2, 170.0, 167.8, 156.9, 156.3, 155.4, 154.3, 153.0, 143.8, 142.7, 141.3, 129.0, 128.8, 127.9, 127.1, 126.1, 125.1, 123.9, 120.2, 120.0, 77.5, 77.3, 77.0, 76.8, 74.2, 73.5, 73.3, 72.6, 68.4, 68.1, 67.7, 66.8, 65.9, 58.3, 58.1, 54.0, 52.9, 52.7, 52.0, 51.4, 48.2, 47.5, 47.1, 47.0, 46.2, 45.0, 39.7, 38.6, 37.7, 35.9, 35.0, 33.9, 30.1, 29.4, 29.2, 28.5, 27.4, 27.1, 18.8, 18.4, 17.6.

HRMS (ESI) calculated for C<sub>34</sub>H<sub>44</sub>N<sub>4</sub>O<sub>8</sub>S [M+H]<sup>+</sup>: 701.2673; found: 701.2677.

**(4*R*,10*R*)-Methyl 10-((((9*H*-fluoren-9-yl)methoxy)carbonyl)amino)-7-isobutyl-6,9-dioxo-8-phenethyl-1,2-dithia-5,8-diazacycloundecane-4-carboxylate, 4d**

yield: 85% (0.57 g)

white solid, Mp: 137-139 °C

R<sub>f</sub> 0.55 (MeOH/ CH<sub>2</sub>Cl<sub>2</sub>, 5:95)

dr ratio: 3:2.8

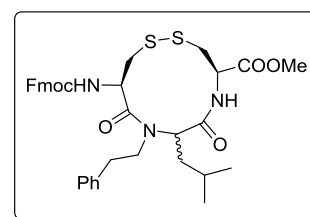

<sup>1</sup>H NMR (500 MHz, CDCl<sub>3</sub>, mixture of diastereomers) δ 7.81 (d, *J* = 2.4 Hz, 0.6H), 7.79 (d, *J* = 4.4 Hz, 0.6H), 7.50 – 7.14 (m, 28H), 5.66 (d, *J* = 6.4 Hz, 0.9H), 5.33 (d, *J* = 7.2 Hz, 1H), 4.48 – 4.45 (m, 1.5H), 4.44 – 4.40 (m, 1.5H), 4.39 – 4.20 (m, 4H), 4.29 – 4.24 (m, 5.7H), 3.77 (s, 3H), 3.75 (s, 2.7H), 3.74 – 3.66 (m, 3.7H), 2.81 – 2.78 (m, 2.5H), 2.77 – 2.74 (m, 5H), 2.73 – 2.67 (m,

3.7H), 1.61 – 1.50 (m, 3.8H), 1.43 – 1.32 (m, 1.8H), 0.98 (d,  $J = 7.3$  Hz, 2.7H), 0.90 (d,  $J = 8.8$  Hz, 2.6H), 0.87 (d,  $J = 8.1$ Hz, 3H), 0.85 (d,  $J = 2.1$ Hz, 3H).

$^{13}\text{C}$  NMR (126 MHz,  $\text{CDCl}_3$ , mixture of diastereomers)  $\delta$  173.4, 172.5, 171.6, 170.4, 170.0, 157.6, 156.5, 146.4, 146.0, 145.3, 141.3, 139.9, 133.7, 132.8, 132.1, 131.0, 130.3, 128.7, 128.4, 128.3, 127.8, 127.2, 126.7, 125.0, 124.3, 122.0, 68.0, 68.1, 63.6, 62.9, 59.4, 52.7, 51.8, 51.3, 48.9, 48.7, 47.9, 43.9, 40.8, 36.8, 36.2, 35.3, 34.1, 30.3, 34.1, 30.4, 29.7, 25.1, 24.8, 22.7, 22.4.

HRMS (ESI) calculated for  $\text{C}_{36}\text{H}_{41}\text{N}_3\text{O}_6\text{S}_2$   $[\text{M}+\text{H}]^+$ : 676.2509; found: 676.2509.

**(4*R*,10*R*)-Methyl 10-(((9*H*-fluoren-9-yl)methoxy)carbonyl)amino)-6,9-dioxo-8-propyl-1,2-dithia-5,8-diazacycloundecane-4-carboxylate, 4e**

yield: 70% (0.38 g)

white solid, Mp: 137-139 °C

$R_f$  0.55 (MeOH/  $\text{CH}_2\text{Cl}_2$ , 5:95)

dr ratio: 3:0

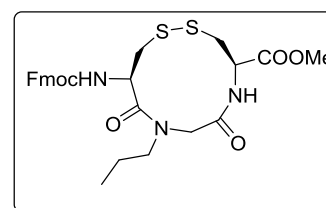

$^1\text{H}$  NMR (500 MHz,  $\text{CDCl}_3$ )  $\delta$  7.84 (d,  $J = 7.4$  Hz, 1H), 7.74 – 7.21 (m, 8H), 5.75 (d,  $J = 9.0$  Hz, 1H), 5.10 – 5.02 (m, 1H), 4.78 – 4.72 (m, 1H), 4.38 – 4.25 (m, 3H), 4.24 (t,  $J = 8.5$  Hz, 2H), 3.77 (s, 3H), 3.53 (td,  $J = 12.1, 2.2$  Hz, 2H), 3.18 – 2.81 (m, 4H), 1.71 (dd,  $J = 18.1, 7.6$  Hz, 2H), 0.86 (t,  $J = 7.5$  Hz, 3H).

$^{13}\text{C}$  NMR (126 MHz,  $\text{CDCl}_3$ )  $\delta$   $^{13}\text{C}$  NMR (126 MHz,  $\text{CDCl}_3$ )  $\delta$  171.59, 170.21, 169.50, 156.52, 143.61, 143.55, 141.29, 141.23, 127.97, 127.76, 127.09, 125.23, 125.12, 124.94, 120.18, 120.14, 120.10, 119.91, 77.34, 77.08, 76.83, 67.33, 54.39, 52.91, 52.44, 51.52, 50.75, 47.13, 46.97, 34.11, 29.71, 20.93, 11.31.

HRMS (ESI) calculated for  $\text{C}_{27}\text{H}_{31}\text{N}_3\text{O}_6\text{S}_2$   $[\text{M}+\text{H}]^+$ : 558.1727; found: 558.1723.

**(4*R*,10*R*)-Methyl 10-((((9*H*-fluoren-9-yl)methoxy)carbonyl)amino)-7-isopropyl-8-methyl-6,9-dioxo-1,2-dithia-5,8-diazacycloundecane-4-carboxylate, 4f**

yield: 82% (0.46 g)

white solid, Mp: 120-123 °C.

$R_f$  0.38 (MeOH/ CH<sub>2</sub>Cl<sub>2</sub>, 5:95)

dr ratio: 3:2

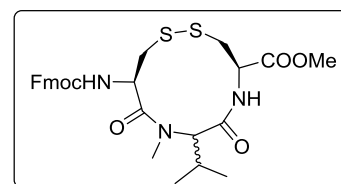

<sup>1</sup>H NMR (500 MHz, CDCl<sub>3</sub>, mixture of diastereomers)  $\delta$  7.79 (d,  $J$  = 7.8 Hz, 2H), 7.59 – 7.27 (m, 16H), 5.94 (d,  $J$  = 8.6 Hz, 1H), 5.76 (d,  $J$  = 9.4 Hz, 0.9H), 4.74 – 4.66 (m, 1.7H), 4.65 – 4.60 (m, 2H), 4.59 – 4.54 (m, 2H), 4.38 – 4.29 (m, 1.7H), 4.26 – 4.15 (m, 3.8H), 3.77 (s, 2.8H), 3.75 (s, 3H), 3.73 – 3.58 (m, 2.5H), 3.53 – 3.49 (m, 2H), 3.43 – 3.35 (m, 1.7H), 3.27 – 3.20 (m, 2H), 3.16 (s, 3H), 3.14 (s, 2H), 3.18 – 2.88 (m, 1H), 2.50 – 2.31 (m, 1.7H), 1.16 (d,  $J$  = 5.4 Hz, 3H), 1.10 (d,  $J$  = 6.5 Hz, 2H), 0.98 (d,  $J$  = 5.5 Hz, 3H), 0.96 (d,  $J$  = 6.2 Hz, 2H).

<sup>13</sup>C NMR (126 MHz, CDCl<sub>3</sub>, mixture of diastereomers)  $\delta$  171.1, 170.5, 169.6, 169.0, 168.8, 156.6, 155.9, 155.8, 144.1, 143.5, 143.4, 129.9, 129.0, 127.8, 127.1, 125.9, 125.1, 124.9, 123.6, 122.5, 120.7, 120.1, 119.9, 77.1, 68.5, 67.4, 66.7, 65.4, 56.4, 55.8, 51.1, 50.6, 49.5, 47.5, 46.6, 38.5, 37.8, 36.9, 33.0, 32.7, 32.3, 31.6, 28.4, 28.0, 27.8, 27.3, 20.2, 19.6, 19.4.

HRMS (ESI) calculated for C<sub>28</sub>H<sub>33</sub>N<sub>3</sub>O<sub>6</sub>S<sub>2</sub> [M+H]<sup>+</sup>: 572.1883; found: 572.1882.

**(4*R*,10*R*)-Methyl 10-((((9*H*-fluoren-9-yl)methoxy)carbonyl)amino)-8-allyl-7-benzyl-6,9-dioxo-1,2-dithia-5,8-diazacycloundecane-4-carboxylate, 4g**

yield: 74% (0.47 g)

white foamy solid, Mp: 103-105 °C

$R_f$  0.45 (MeOH/ CH<sub>2</sub>Cl<sub>2</sub>, 3:97)

dr ratio: 3:2

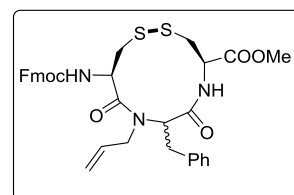



<sup>1</sup>H NMR (500 MHz, CDCl<sub>3</sub>, mixture of diastereomers) δ 7.63 – 7.10 (m, 23H), 5.91 (d, *J* = 6.4 Hz, 0.7H), 5.82 (d, *J* = 5.5 Hz, 0.9H), 5.65 (d, *J* = 18.4 Hz, 0.45H), 5.49 – 5.35 (m, 2H), 4.88 – 4.85 (m, 0.8H), 4.82 – 4.76 (m, 2H), 4.75 – 4.55 (m, 2.5H), 4.49 – 4.30 (m, 3H), 4.29 – 4.18 (m, 1.5H), 4.05 – 3.89 (m, 4H), 3.77 (s, 2H), 3.75 (s, 3H), 3.26 – 3.15 (m, 3H), 2.98 – 2.55 (m, 6H).

<sup>13</sup>C NMR (126 MHz, CDCl<sub>3</sub>, mixture of diastereomers) δ 170.95, 170.65, 170.41, 170.09, 169.90, 169.57, 156.01, 155.64, 143.74, 143.62, 141.32, 138.03, 137.53, 137.05, 136.97, 129.30, 129.23, 129.12, 129.01, 128.69, 128.50, 128.19, 127.84, 127.78, 127.50, 127.15, 126.85, 125.82, 125.41, 125.21, 125.02, 120.18, 119.97, 77.42, 77.16, 76.91, 73.03, 69.48, 68.65, 67.30, 66.76, 54.87, 52.91, 52.61, 51.73, 47.60, 47.17, 47.09, 46.60, 40.78, 39.04, 33.50, 31.54, 29.72.

HRMS (ESI) calculated for C<sub>34</sub>H<sub>35</sub>N<sub>3</sub>O<sub>6</sub>S<sub>2</sub> [M+H]<sup>+</sup>: 646.2040; found: 646.2040.

**(4*R*,10*R*)-Methyl 10-(((9*H*-fluoren-9-yl)methoxy)carbonyl)amino)-6,9-dioxo-8-trityl-1,2-dithia-5,8-diazacycloundecane-4-carboxylate, 4h**

yield: 68% (0.51 g)

white solid, Mp: 137-139 °C

R<sub>f</sub> 0.44 (MeOH/ CH<sub>2</sub>Cl<sub>2</sub>, 3:97)

dr ratio: 3:0

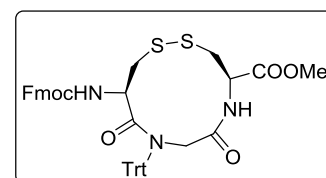

<sup>1</sup>H NMR (500 MHz, CDCl<sub>3</sub>) δ 7.80 (d, *J* = 8.2 Hz, 1H), 7.61 – 7.15 (m, 25H), 5.48 (d, *J* = 7.5 Hz, 1H), 4.88 – 4.63 (m, 2H), 4.24 (d, *J* = 6.2 Hz, 2H), 4.16 (t, *J* = 12.2 Hz, 1H), 4.13 – 4.01 (m, 2H), 2.98 – 2.88 (m, 2H).

<sup>13</sup>C NMR (126 MHz, CDCl<sub>3</sub>) δ 172.2, 171.1, 170.2, 156.3, 144.0, 143.5, 142.6, 141.3, 130.8, 129.7, 129.4, 128.8, 128.7, 127.9, 127.8, 127.2, 126.9, 126.3, 125.5, 124.8, 120.3, 120.1, 79.3, 77.3, 77.0, 76.8, 64.5, 60.1, 59.2, 54.4, 47.1, 45.7, 39.5, 36.8.

HRMS (ESI) calculated for C<sub>115</sub>H<sub>113</sub>N<sub>7</sub>O<sub>14</sub>S<sub>4</sub> [M+H]<sup>+</sup>: 758.2353; found: 758.2356.

**(4*R*,13*R*)-Methyl 13-((((9*H*-fluoren-9-yl)methoxy)carbonyl)amino)-8-benzyl-7-isobutyl-6,9,12-trioxo-1,2-dithia-5,8,11-triazacyclotetradecane-4-carboxylate, 4i**

yield: 77% (0.55 g)

white solid, Mp: 109 – 111 °C.

R<sub>f</sub> 0.61 (MeOH/ CH<sub>2</sub>Cl<sub>2</sub>, 5:95)

dr ratio: 3:2.7

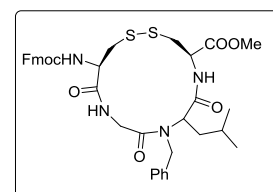

<sup>1</sup>H NMR (500 MHz, CDCl<sub>3</sub>, mixture of diastereomers) δ 7.79 (d, *J* = 9.2 Hz, 2.8H), 7.60 (t, *J* = 10.3 Hz, 2.8H), 7.46 – 7.06 (m, 10H), 7.01 (br, s, 1H), 6.08 (br, s, 1H), 5.23 – 5.10 (m, 0.6H), 4.98 – 4.90 (m, 0.9H), 4.74 – 4.68 (m, 2.3H), 4.65 – 4.32 (m, 7H), 4.28 – 4.22 (m, 2.7H), 3.77 (s, 3H), 3.75 (s, 0.7H), 3.68 – 3.44 (m, 4.5H), 3.63 – 2.96 (m, 3.5H), 2.18 – 1.86 (m, 2.8H), 1.65 – 1.28 (m, 1.5H), 0.98 – 0.78 (m, 9H).

<sup>13</sup>C NMR (126 MHz, CDCl<sub>3</sub>) δ 172.0, 171.3, 170.7, 169.9, 159.0, 158.1, 157.2, 154.1, 143.6, 142.2, 141.3, 137.7, 130.9, 130.4, 129.7, 129.1, 127.8, 127.1, 126.7, 126.5, 125.9, 125.1, 124.1, 123.9, 120.2, 120.0, 77.3, 77.0, 76.8, 67.5, 67.0, 65.4, 64.7, 64.3, 63.6, 58.5, 57.4, 53.2, 52.4, 51.4, 50.9, 47.2, 46.8, 39.0, 38.2, 37.9, 37.2, 36.8, 35.9, 35.3, 35.0, 29.7, 25.6, 25.2, 23.1, 22.4, 22.0.

HRMS (ESI) calculated for C<sub>37</sub>H<sub>42</sub>N<sub>4</sub>O<sub>7</sub>S<sub>2</sub> [M+H]<sup>+</sup>: 719.2567; found: 719.2568.

**(*R*)-Methyl 8-(2-((((9*H*-fluoren-9-yl)methoxy)carbonyl)amino)acetyl)-6-oxo-1,2,5,8-dithiadiazecane-4-carboxylate, 4j**

yield: 79% (0.41 g)

white solid, Mp: 115 – 117 °C

R<sub>f</sub> 0.48 (MeOH/ CH<sub>2</sub>Cl<sub>2</sub>, 5:95)

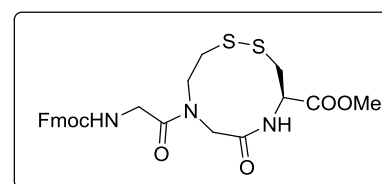

<sup>1</sup>H NMR (500 MHz, CDCl<sub>3</sub>) δ 7.79 (t, *J* = 7.6 Hz, 2H), 7.65 (d, *J* = 7.6 Hz, 2H), 7.42 (q, *J* = 7.7 Hz, 2H), 7.35 (t, *J* = 7.5 Hz, 2H), 7.04 (d, *J* = 9.1 Hz, 1H), 5.89 – 5.80 (br, s, 1H), 4.51– 4.45 (m, 1H)

4.43 (t,  $J = 8.9$  Hz, 1H), 4.21 (d,  $J = 8.2$  Hz, 2H), 4.17 – 4.11 (m, 2H), 3.90 – 3.80 (m, 2H), 3.75 (s, 3H), 3.70 – 3.55 (m, 2H), 3.38 (d,  $J = 12.8$  Hz, 1H, 1H), 3.31 (d,  $J = 15.3$  Hz, 1H), 3.12 – 2.95 (m, 2H).

$^{13}\text{C}$  NMR (126 MHz,  $\text{CDCl}_3$ )  $\delta$  170.3, 169.7, 169.5, 156.3, 143.8, 141.3, 127.8, 127.1, 125.1, 125.0, 120.0, 67.3, 60.4, 55.6, 52.6, 48.3, 47.1, 43.3, 42.9, 41.6, 39.3, 30.2.

HRMS (ESI) calculated for  $\text{C}_{25}\text{H}_{27}\text{N}_3\text{O}_6\text{S}_2$   $[\text{M}+\text{H}]^+$ : 530.1414; found: 530.1412.

**(9H-Fluoren-9-yl)methyl (2-(benzyl((4R)-4-((methylperoxy)methyl)-6-oxo-1,2,5-dithiazocan-7-yl)amino)-2-oxoethyl)carbamate, 4k**

yield: 72% (0.43 g)

white solid, Mp: 101 – 103 °C

$R_f$  0.38 (MeOH/  $\text{CH}_2\text{Cl}_2$ , 5:95)

dr ratio: 3:2.3

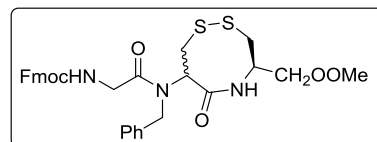

$^1\text{H}$  NMR (500 MHz,  $\text{CDCl}_3$ , mixture of diastereomers)  $\delta$  7.77 – 7.24 (m, 20H), 6.77 (d,  $J = 9.5$  Hz, 1H), 5.82 (d,  $J = 21.3$  Hz, 1H), 5.10 – 4.96 (m, 2H), 4.88 – 4.79 (m, 4H), 4.26 – 4.05 (m, 9H), 3.80 (s, 1.8H), 3.78 (s, 3H), 3.66 – 3.55 (m, 4H), 3.50 – 3.46 (m, 1H), 3.21 – 2.88 (m, 6H).

$^{13}\text{C}$  NMR (126 MHz,  $\text{CDCl}_3$ , mixture of diastereomers)  $\delta$  172.8, 171.7, 170.6, 170.1, 169.8, 168.3, 164.4, 156.8, 156.3, 148.8, 143.8, 143.5, 141.2, 135.7, 135.2, 131.0, 130.1, 129.2, 126.5, 125.4, 125.3, 125.1, 119.6, 67.9, 67.1, 66.5, 66.3, 59.8, 59.4, 53.7, 55.2, 52.8, 51.8, 50.1, 49.3, 48.8, 48.4, 47.9, 47.1, 46.1, 45.7, 43.7, 43.1, 41.9, 40.3.

HRMS (ESI) calculated for  $\text{C}_{31}\text{H}_{31}\text{N}_3\text{O}_6\text{S}_2$   $[\text{M}+\text{H}]^+$ : 606.1727; found: 606.1724.

**(R)-Methyl 2-(2-(7-(((9H-fluoren-9-yl)methoxy)carbonyl)amino)-6-oxo-1,2,5-dithiazocan-5-yl)acetamido)acetate, 4l**

yield: 71% (0.37 g)

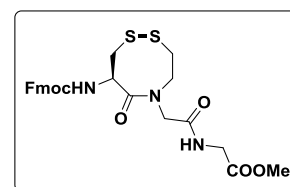

white solid, Mp: 118-120 °C

R<sub>f</sub> 0.31 (MeOH/ CH<sub>2</sub>Cl<sub>2</sub>, 3:97)

<sup>1</sup>H NMR (500 MHz, CDCl<sub>3</sub>) δ 7.78 (d, *J* = 7.6 Hz, 2H), 7.60 (d, *J* = 7.5 Hz, 2H), 7.42 – 7.02 (m, 4H), 6.01 (br, s, 0.3 H), 4.51 – 4.41 (m, 1H), 4.40 (d, *J* = 2.2 Hz, 2H), 4.25 (t, *J* = 8.2 Hz, 1H), 4.08 (d, *J* = 16.1 Hz, 1.5H), 4.01 (t, *J* = 10.6 Hz, 2H), 3.81 – 3.77 (m, 2H), 3.74 (s, 3H), 3.02 – 2.09 (m, 3H), 2.75 – 2.55 (m, 1H).

<sup>13</sup>C NMR (126 MHz, CDCl<sub>3</sub>) δ 172.8, 169.9, 168.4, 155.3, 143.8, 143.6, 141.3, 127.8, 127.1, 125.1, 125.0, 124.5, 120.1, 77.3, 77.1, 76.8, 67.2, 54.1, 52.4, 50.8, 47.1, 45.9, 43.0, 41.2, 37.2.

HRMS (ESI) calculated for C<sub>25</sub>H<sub>27</sub>N<sub>3</sub>O<sub>6</sub>S<sub>2</sub> [M+H]<sup>+</sup>: 530.1414; found: 530.1414.

**Methyl 2-(5-(2-(((9*H*-fluoren-9-yl)methoxy)carbonyl)amino)acetyl)-1,2,5-dithiazocane-6-carboxamido)acetate, 4m**

yield: 75% (0.40 g)

white solid, Mp: 141-143 °C

R<sub>f</sub> 0.42 (MeOH/ CH<sub>2</sub>Cl<sub>2</sub>, 5:95)

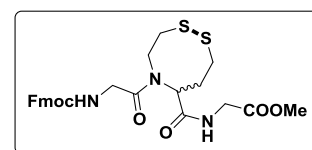

<sup>1</sup>H NMR (500 MHz, CDCl<sub>3</sub>) δ 7.78 (d, *J* = 7.6 Hz, 2H), 7.62 (d, *J* = 7.6 Hz, 2H), 7.42 – 7.22 (m, 4H), 7.01 (br, d, *J* = 3.5 Hz, 1H), 5.93 (br, s, 1H), 4.39 (t, *J* = 10.9, 2H), 4.30 – 4.18 (m, 1H), 4.04 (dd, *J* = 7.5, 5.0 Hz, 2H), 3.91 (dd, *J* = 28.0, 11.3 Hz, 2H), 3.72 (s, 3H), 3.41 (t, *J* = 13.2 Hz, 2H), 3.11 – 3.04 (m, 2H), 2.80 – 3.02 (m, 2H), 2.49 – 2.29 (m, 2H).

<sup>13</sup>C NMR (126 MHz, CDCl<sub>3</sub>) δ 171.1, 170.8, 170.1, 156.6, 143.8, 143.7, 141.3, 127.8, 127.8, 127.1, 125.1, 124.8, 120.0, 67.3, 60.1, 52.5, 47.9, 46.7, 43.3, 41.2, 41.1, 31.9, 30.8, 29.7.

HRMS (ESI) calculated for C<sub>26</sub>H<sub>29</sub>N<sub>3</sub>O<sub>6</sub>S<sub>2</sub> [M+H]<sup>+</sup>: 544.1570; found: 544.1569.

**Methyl 2-(((7*R*)-7-(((9*H*-fluoren-9-yl)methoxy)carbonyl)amino)-5-benzyl-6-oxo-1,2,5-dithiazocane-4-carboxamido)acetate, 4n**

yield: 88% (0.53 g)

white solid, Mp: 121-123 °C

R<sub>f</sub> 0.55 (MeOH/ CH<sub>2</sub>Cl<sub>2</sub>, 5:95)

dr ratio: 3:2.5

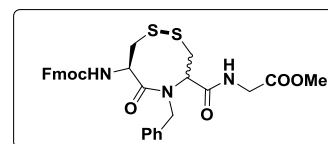

<sup>1</sup>H NMR (500 MHz, CDCl<sub>3</sub>, mixture of diastereomers) δ 7.78 (dt, *J* = 9.6, 5.2 Hz, 2H), 7.66 – 7.16 (m, 19H), 6.38 (d, *J* = 6.4 Hz, 1H), 5.86 (d, *J* = 11.1 Hz, 0.8H), 5.23 – 5.15 (m, 1.5H), 5.0 – 4.80 (m, 1.2H), 4.78 – 4.73 (m, 1H), 4.61 – 4.50 (m, 0.9H), 4.48 – 4.40 (m, 2.2H), 4.38 – 4.26 (m, 3H), 4.24 – 4.16 (m, 4H), 3.82 (d, *J* = 6.2 Hz, 1.2H), 3.80 – 3.66 (m, 2.7H), 3.65 (s, 3H), 3.48 (s, 1.2H), 3.35 – 3.26 (m, 3H), 3.24 – 3.18 (m, 3H), 3.16 – 2.75 (m, 3H).

<sup>13</sup>C NMR (126 MHz, CDCl<sub>3</sub>, mixture of diastereomers) δ 173.3, 173.1, 169.6, 169.5, 167.8, 155.8, 154.6, 143.4, 143.7, 143.6, 143.3, 141.0, 136.9, 136.7, 129.8, 129.7, 128.8, 128.7, 128.5, 128.3, 128.2, 128.1, 127.9, 127.8, 127.7, 127.5, 127.2, 125.0, 124.8, 120.3, 120.1, 120.0, 119.1, 67.4, 67.2, 67.1, 60.9, 60.4, 58.7, 58.0, 57.6, 54.6, 52.8, 52.5, 52.2, 52.1, 52.0, 47.0, 46.9, 46.7, 46.6, 43.7, 43.6, 42.9, 41.7, 41.0, 40.5, 39.4, 39.1, 39.0.

HRMS (ESI) calculated for C<sub>31</sub>H<sub>31</sub>N<sub>3</sub>O<sub>6</sub>S<sub>2</sub> [M+H]<sup>+</sup>: 606.1727; found: 606.1723.

### 7-Isobutyl-8-methyl-1,2-dithia-5,8,14-triazacyclohexadecane-6,9,13-trione, 4o

yield: 82% (0.37 g)

white solid, Mp: 91-93 °C

R<sub>f</sub> 0.30 (MeOH/ CH<sub>2</sub>Cl<sub>2</sub>, 5:95)

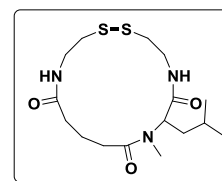

<sup>1</sup>H NMR (500 MHz, CDCl<sub>3</sub>) δ 6.97 (t, *J* = 5.3 Hz, 1H), 5.21 (dd, *J* = 10.0, 5.5 Hz, 1H), 4.03 – 3.93 (m, 1H), 3.77 – 3.68 (m, 1H), 3.68 – 3.61 (m, 1H), 3.63 – 3.53 (m, 2H), 3.21 (s, 3H), 3.18 – 3.08 (m, 2H), 3.08 – 2.94 (m, 2H), 2.48 – 2.24 (m, 4H), 2.03 – 1.78 (m, 2H), 1.75 – 1.57 (m, 2H), 1.47 (dddd, *J* = 13.2, 8.5, 6.7, 3.4 Hz, 1H), 0.99 (d, *J* = 8.5, 2H), 0.99 (d, *J* = 8.5, 3H), 0.91 (d, *J* = 12.8, 3H).

$^{13}\text{C}$  NMR (126 MHz,  $\text{CDCl}_3$ )  $\delta$  173.9, 173.3, 169.8, 55.2, 42.8, 40.9, 39.3, 38.9, 37.4, 37.3, 35.8, 32.8, 31.2, 29.5, 24.9, 23.3, 22.0, 21.8.

HRMS (ESI) calculated for  $\text{C}_{16}\text{H}_{29}\text{N}_3\text{O}_3\text{S}_2$   $[\text{M}+\text{H}]^+$ : 376.1723; found: 376.1723.

**(4*R*)-Methyl 7-((*S*)-4-(((9*H*-fluoren-9-yl)methoxy)carbonyl)amino)-5-methoxy-5-oxopentanamido)-6-oxo-1,2,5-dithiazocane-4-carboxylate, 4p**

yield: 71% (0.42 g)

white solid, Mp: 105-107 °C

$R_f$  0.28 (MeOH/  $\text{CH}_2\text{Cl}_2$ , 5:95)

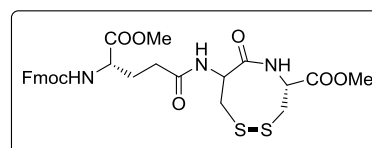

Single diastereomer isolated from Ugi product is used for disulfide formation

$^1\text{H}$  NMR (500 MHz,  $\text{CDCl}_3$ )  $\delta$  7.78 (d,  $J$  = 7.5 Hz, 2H), 7.68 (d,  $J$  = 12.5 Hz, 2H), 7.45 – 7.26 (m, 6H), 7.19 (d,  $J$  = 6.0 Hz, 1H), 6.67 (d,  $J$  = 11.6 Hz, 1H), 5.76 (d,  $J$  = 7.4 Hz, 1H), 5.05 – 4.91 (m, 1H), 4.85 – 4.71 (m, 1H), 4.54 – 4.48 (m, 1H), 4.42 (d,  $J$  = 8.6 Hz, 2H), 4.23 (t,  $J$  = 7.1 Hz, 10H), 3.79 (s, 3H), 3.76 (s, 3H), 3.46 (dd,  $J$  = 11.1 Hz, 1H), 3.35 (dd,  $J$  = 10.5 Hz, 1H), 3.16 (d,  $J$  = 18.6 Hz, 1H), 3.06 (dd,  $J$  = 21.9 Hz, 1H), 2.86 (dt,  $J$  = 15.8, 6.5 Hz, 2H), 1.98 (td,  $J$  = 14.2, 7.8 Hz, 2H).

$^{13}\text{C}$  NMR (126 MHz,  $\text{CDCl}_3$ )  $\delta$  172.48, 171.15, 169.70, 168.95, 155.93, 143.86, 143.72, 141.31, 127.74, 127.10, 125.12, 120.00, 77.30, 77.05, 76.79, 67.06, 54.49, 53.36, 53.14, 52.60, 52.23, 47.17, 42.40, 42.28, 31.92, 28.15.

HRMS (ESI) calculated for  $\text{C}_{28}\text{H}_{31}\text{N}_3\text{O}_8\text{S}_2$   $[\text{M}+\text{H}]^+$ : 602.1625; found: 602.1620.

**Disulfide 5a, 5b and 5c (Mixture of regioisomers)**

0.1 mmol scale

Yield: 75% (0.75 mg)

White solid, Mp: 125-128 °C

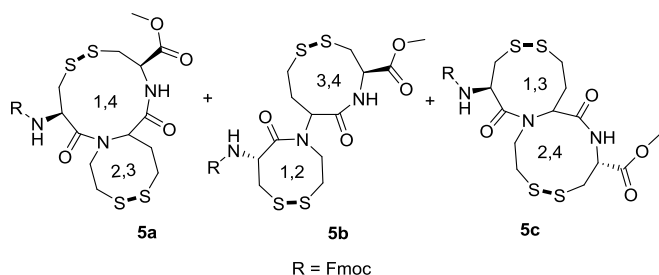

R<sub>f</sub> 0.55 (MeOH/ CH<sub>2</sub>Cl<sub>2</sub>, 5:95)

<sup>1</sup>H NMR (500 MHz, CDCl<sub>3</sub>) δ 7.80 (d, *J* = 7.4 Hz, 4H), 7.61 (dd, *J* = 7.5, 2.4 Hz, 4H), 7.44 (t, *J* = 7.5 Hz, 4H), 7.41 – 7.30 (m, 4H), 7.30 (s, 2H), 7.11 (d, *J* = 8.1 Hz, 1H), 5.91 (s, 1H), 5.01 (d, *J* = 8.5 Hz, 1H), 4.93 (s, 1H), 4.77 – 4.71 (m, 1H), 4.53 – 4.40 (m, 4H), 4.25 (t, *J* = 7.2 Hz, 2H), 4.03 (d, *J* = 1.3 Hz, 1H), 3.82 (d, *J* = 2.6 Hz, 7H), 3.74 – 3.65 (m, 2H), 3.52 (t, *J* = 7.6 Hz, 2H), 3.39 (d, *J* = 15.0 Hz, 2H), 3.18 – 3.06 (m, 3H), 3.06 – 3.00 (m, 2H), 2.98 (s, 1H), 2.88 (d, *J* = 14.3 Hz, 2H), 2.69 – 2.59 (m, 2H).

<sup>13</sup>C NMR (126 MHz, CDCl<sub>3</sub>) δ 172.48, 171.15, 169.70, 156.31, 143.86, 143.72, 141.31, 127.74, 127.10, 125.12, 120.00, 77.30, 77.05, 76.79, 67.06, 53.36, 53.14, 52.60, 52.23, 47.17, 42.40, 42.28, 31.92, 28.15.

HRMS (ESI) calculated for C<sub>27</sub>H<sub>32</sub>N<sub>3</sub>O<sub>6</sub>S<sub>4</sub> [M+H]<sup>+</sup>: 634.1168; found: 634.1168.

## Ms/Ms analysis of Disulfide Regioisomers **5a**, **5a** and **5c**

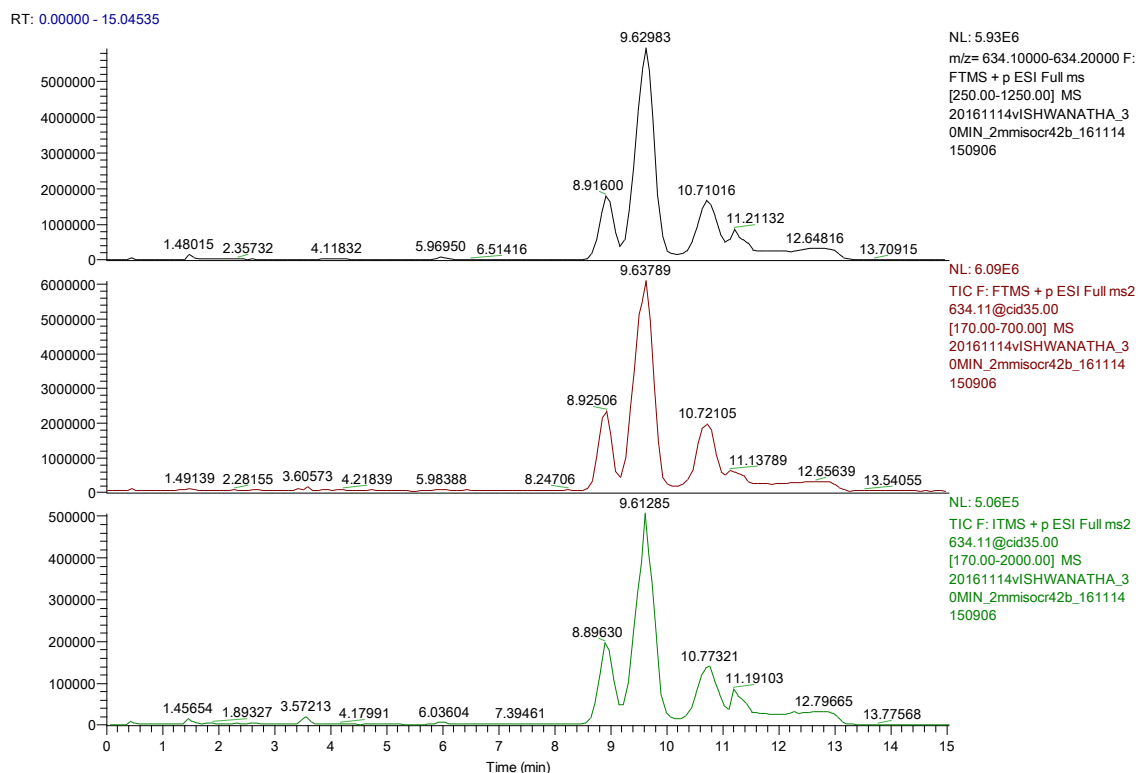

### Structural assignment based on MS/MS analysis:

All the regioisomers showed common m/z value at 412 (M+H-Fmoc+H)<sup>+</sup> which can be rationalized by McLafferty-type rearrangement involving a  $\gamma$ -hydrogen migration from the fluorenyl moiety. Peak at 8.9 clearly shows the disulfide connectivity **5b** due to distinct m/z values at 341.01 which can be attributed by the formation of dehydroalanine of the cysteine residues followed by N-terminal amide cleavage (see supporting information) which is not observed in other two. Also, the distinct m/z value at 367.02 corresponds to cleavage of C-N bond from the tertiary amide followed by H<sub>2</sub>S liberation (see supporting information. Which also supports the peak at 8.9 was found to be regioisomer **5b**. The detailed mechanistic investigation and MS/MS analysis of all the regioisomers are under investigation.



**Proposed disulfide connectivity 5b from Ms/Ms fragmentation: HPLC Rt = 8.9 min**

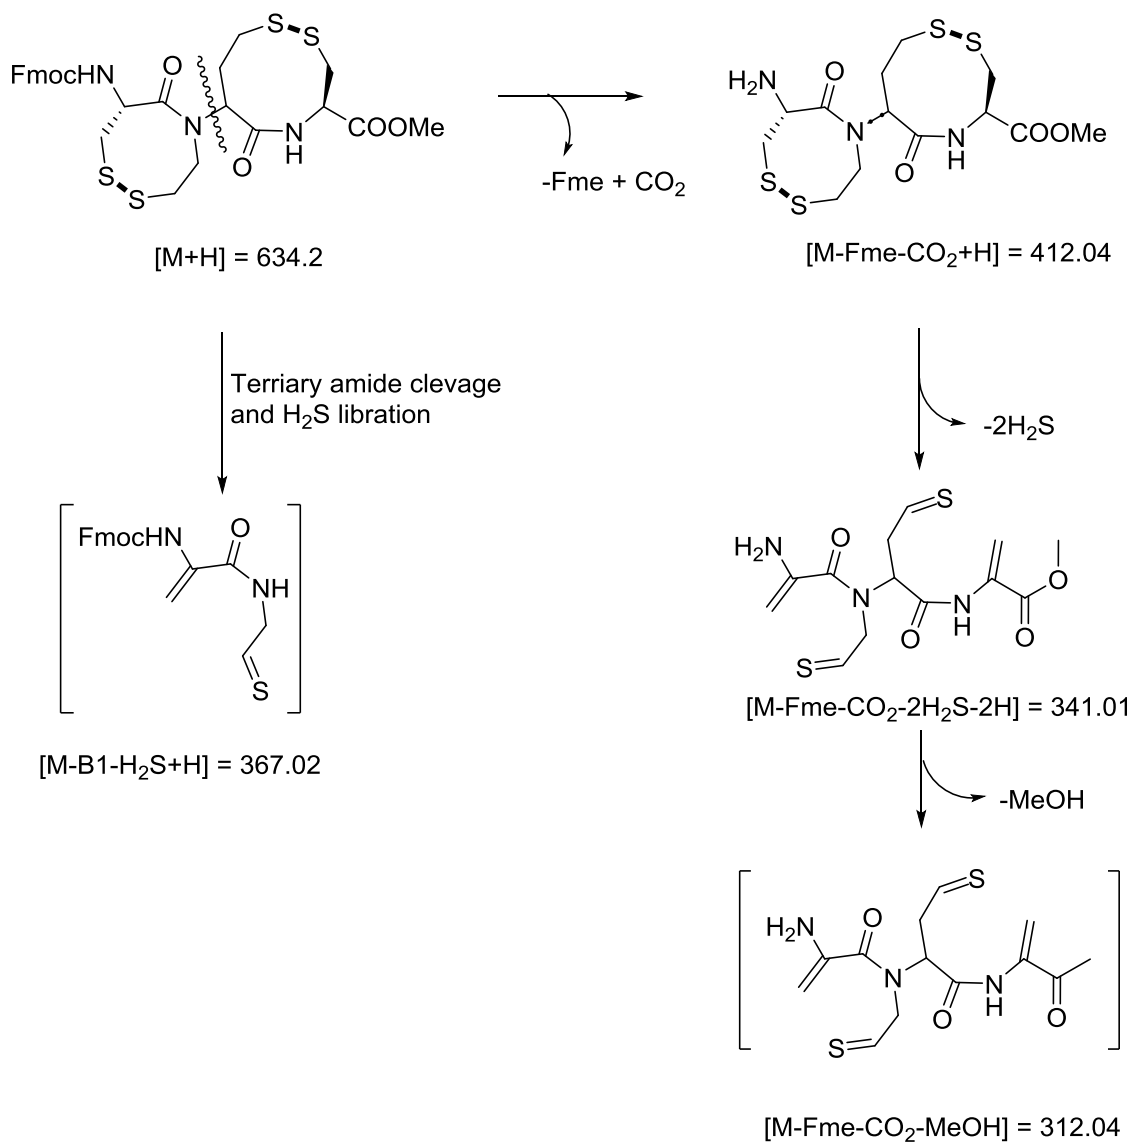

Proposed disulfide 5c connectivity from Ms/Ms fragmentation: HPLC Rt: 9.6 min

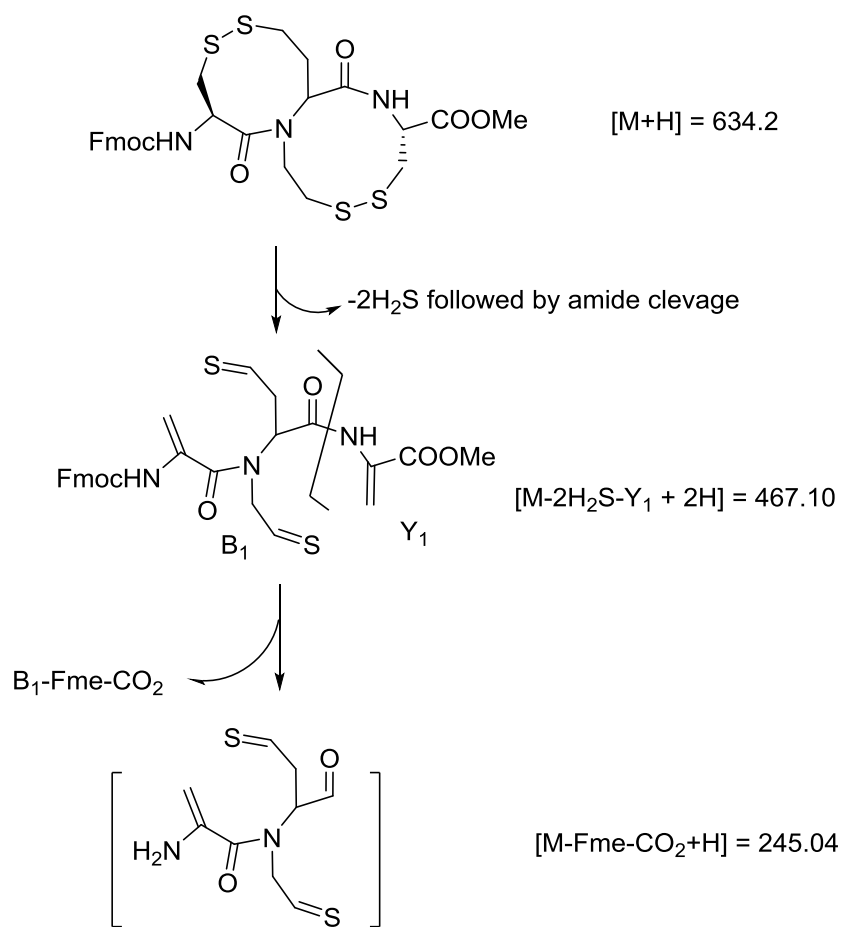

# MS/MS 634 @ RT8.9

20161114v1SHWANATHA\_30MIN\_2mmisocr42b\_16111415090  
F: FTMS + p ESI Full ms2 634.11@cid35.00 [170.00-700.00]

8.92506 AV: 1 NL: 7.67E5

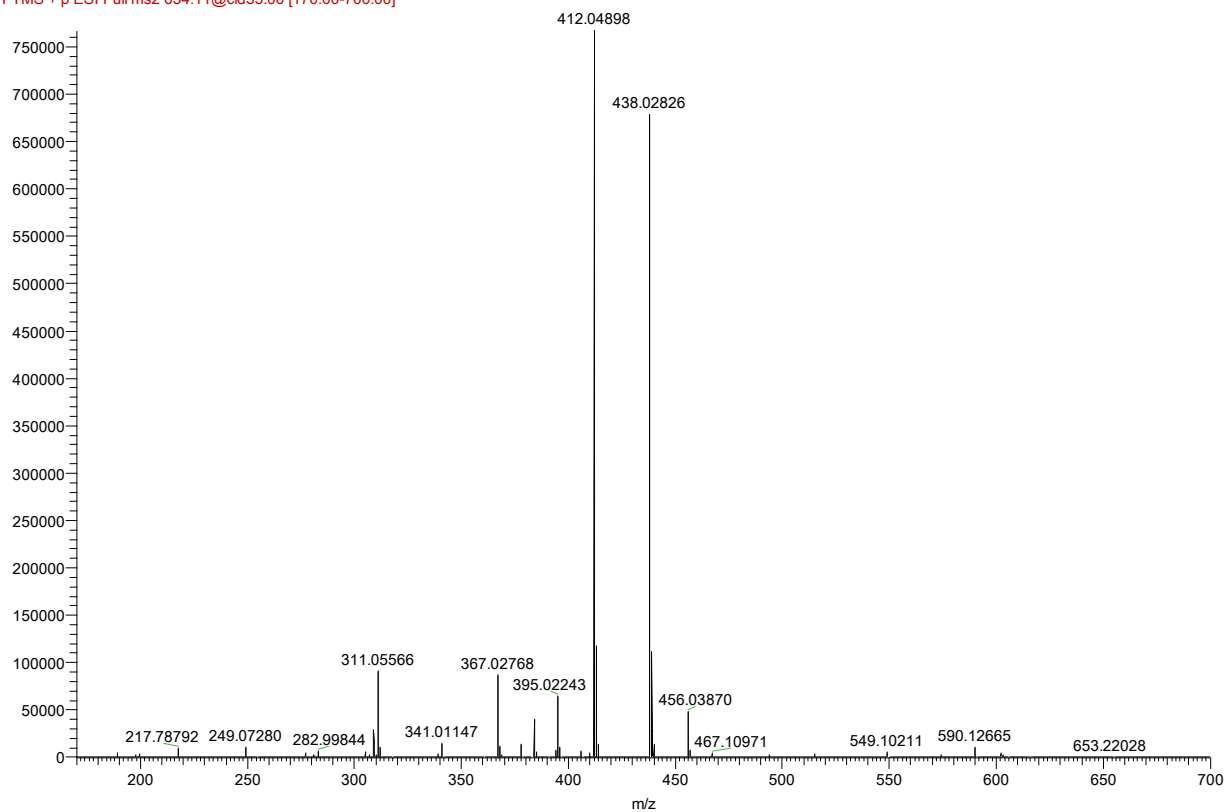

# MS/MS m/z 634 @ RT9.6

20161114vISHWANATHA\_30MIN\_2mmisocr42b\_16111415090  
F: FTMS + p ESI Full ms2 634.11@cid35.00 [170.00-700.00]

9.63789 AV: 1 NL: 2.35E6

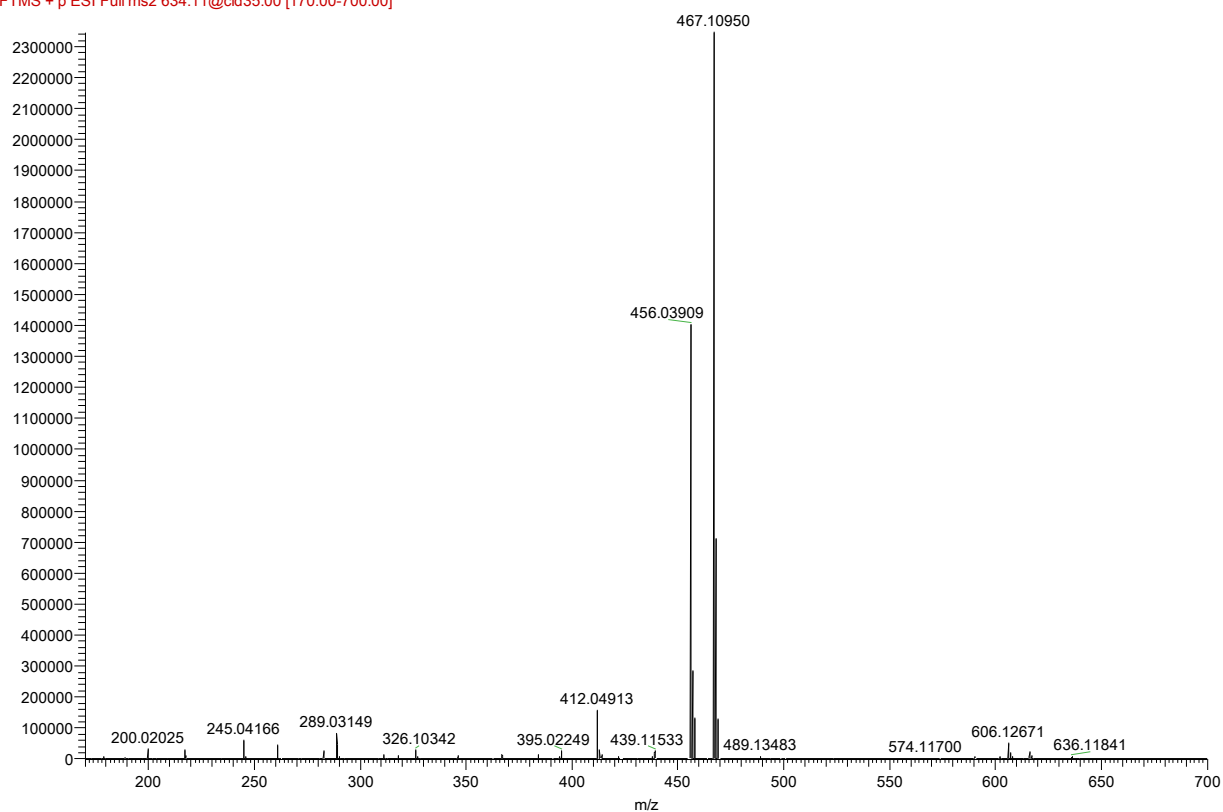

# Msms m/z 634 @ RT10.7

20161114vISHWANATHA\_30MIN\_2mmisocr42b\_16111415090  
F: FTMS + p ESI Full ms2 634.11@cid35.00 [170.00-700.00]

10.72105 AV: 1 NL: 7.48E5

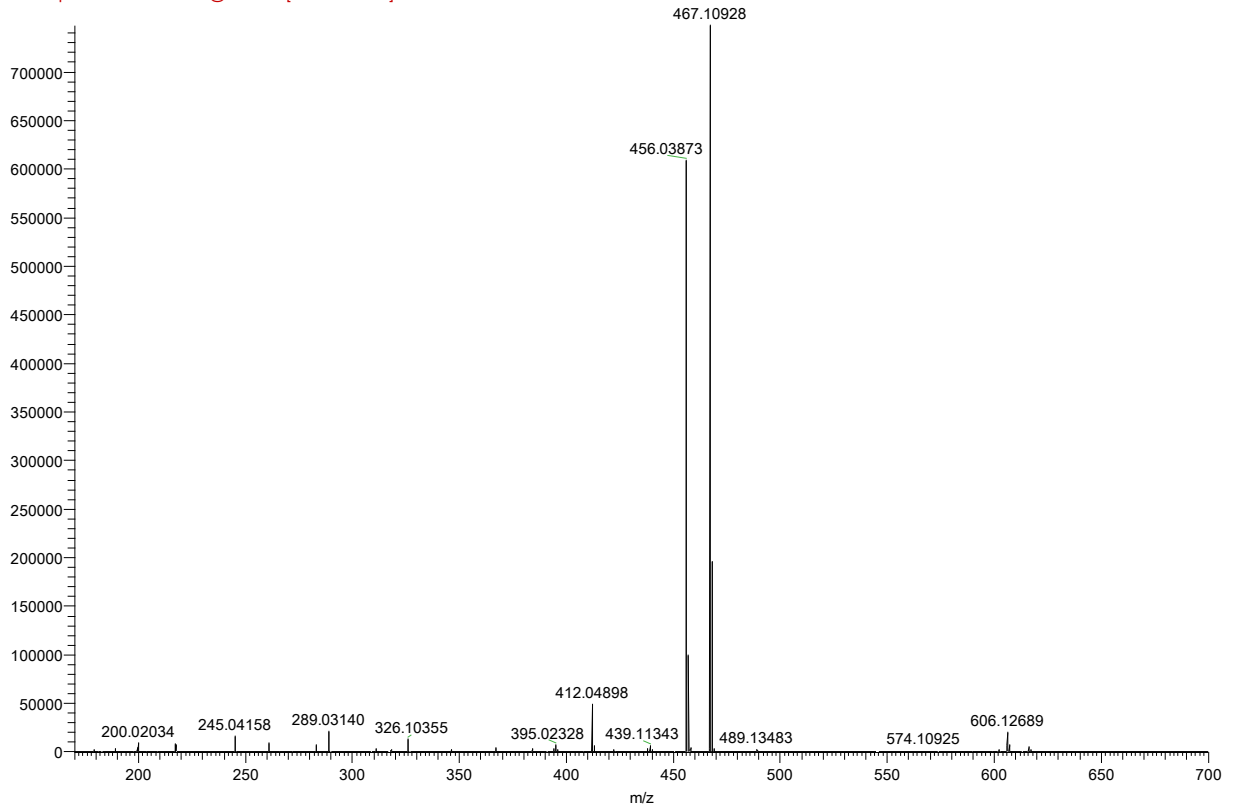

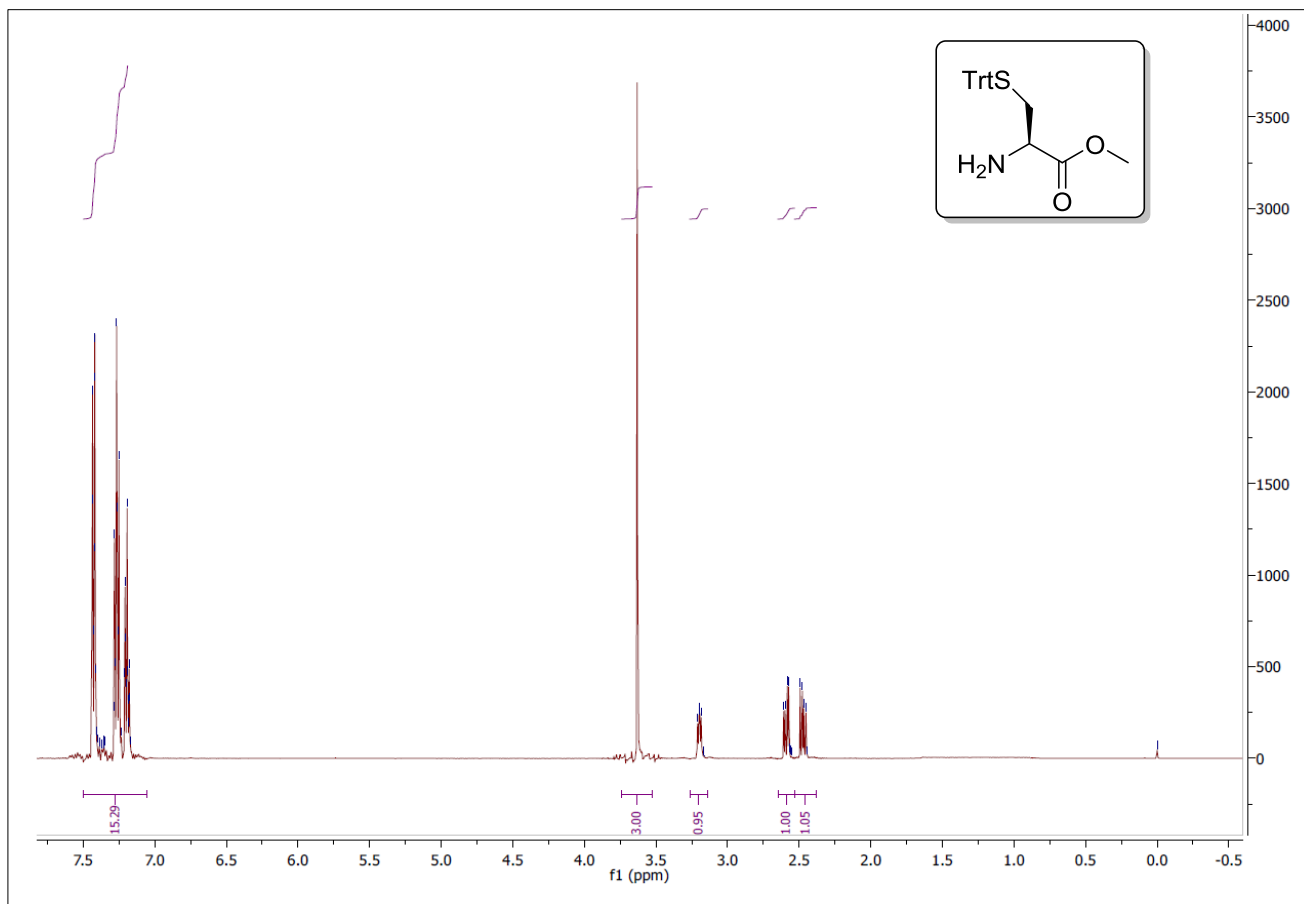

<sup>1</sup>H NMR of methyl S-trityl-L-cysteinate

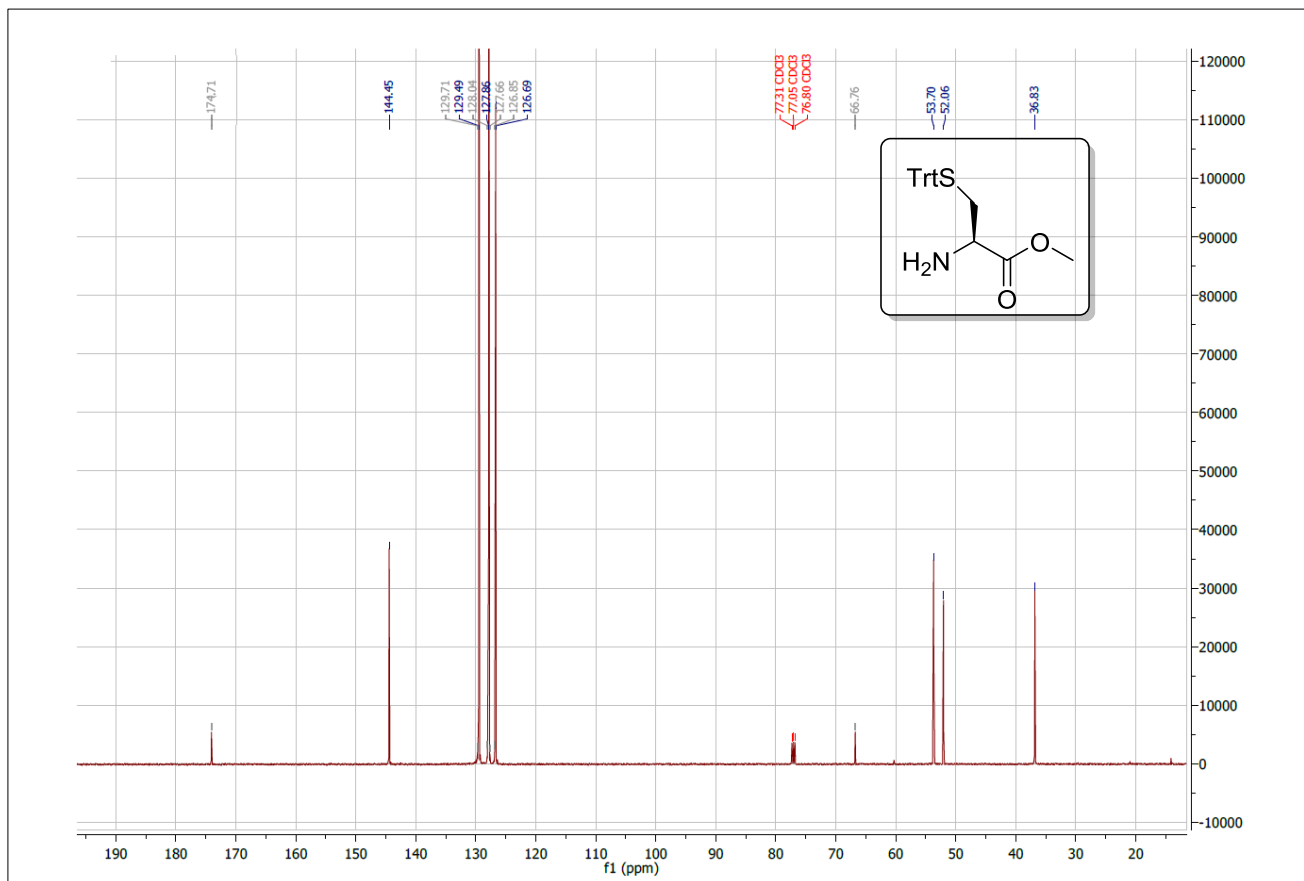

<sup>13</sup>C NMR of methyl S-trityl-L-cysteinate

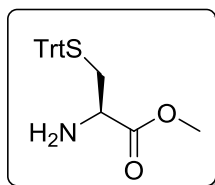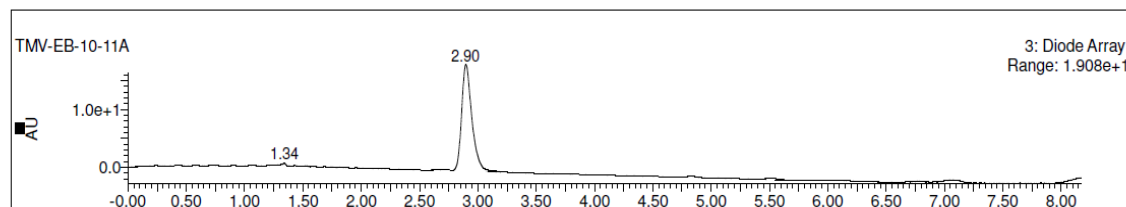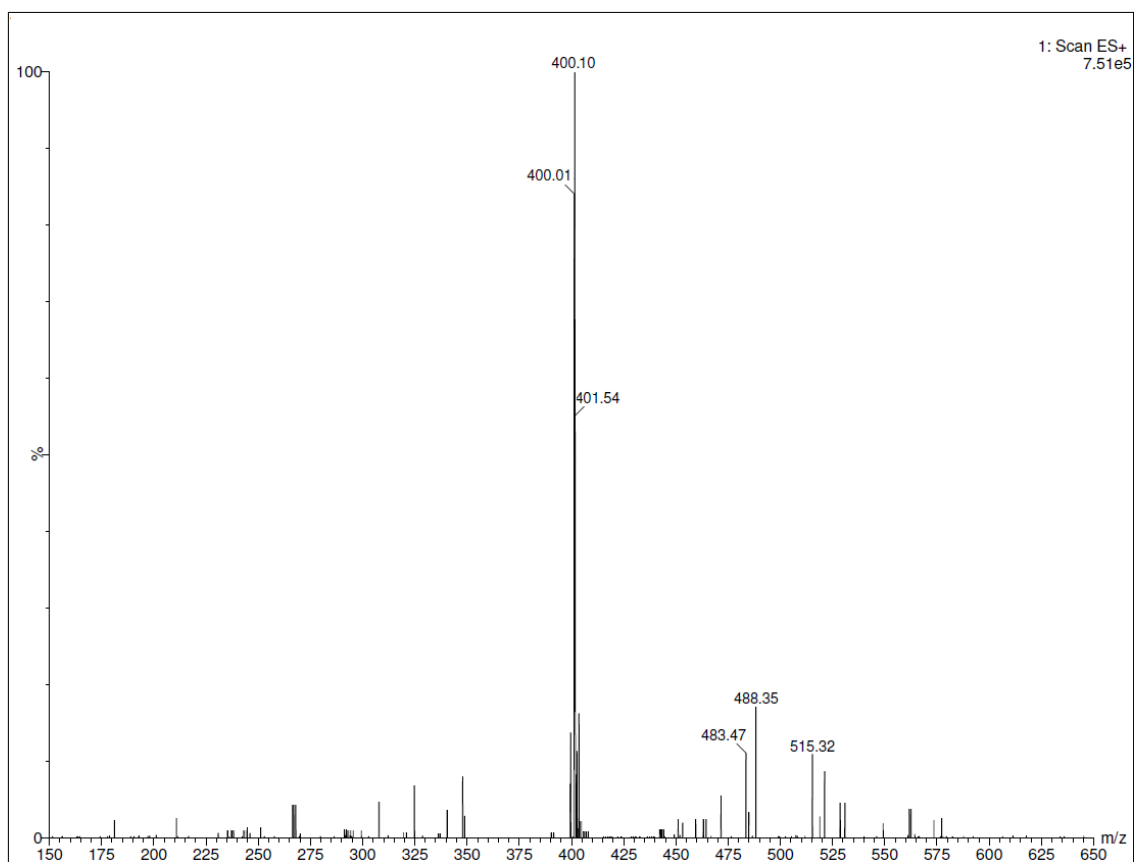

SFC-HPLC and ESI-MS of methyl S-trityl-L-cysteinate

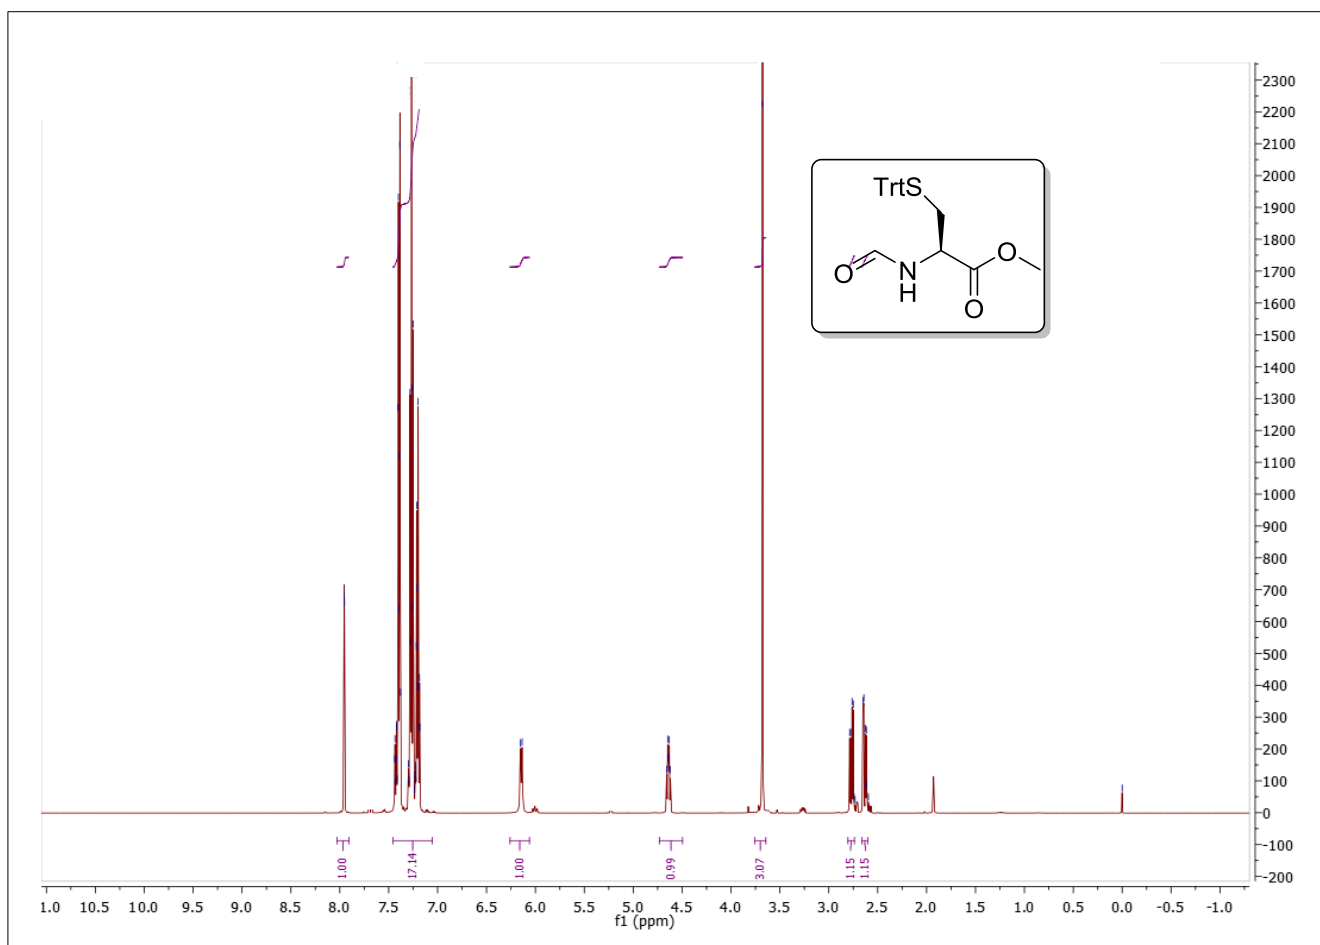

<sup>1</sup>H NMR of methyl N-formyl-S-trityl-L-cysteinate

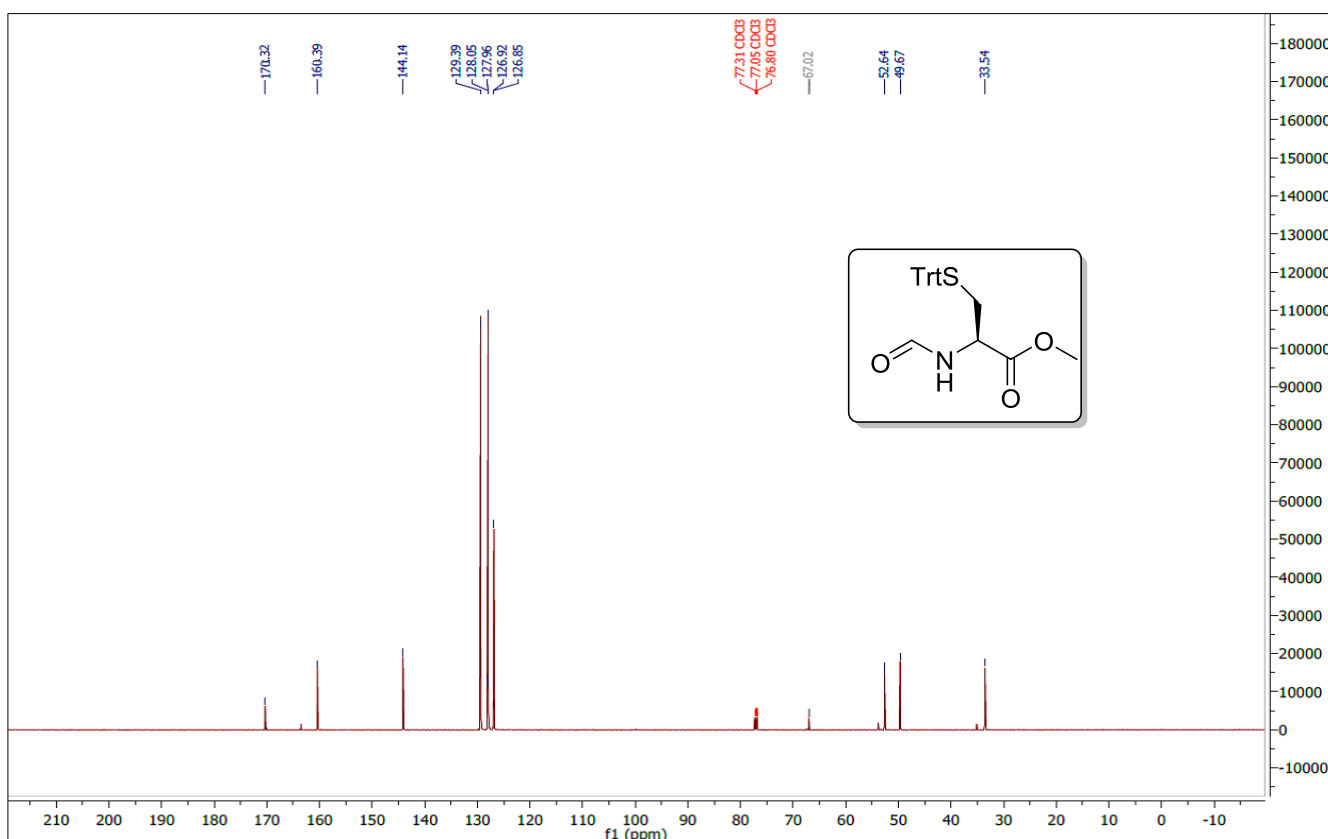

<sup>13</sup>C NMR of methyl N-formyl-S-trityl-L-cysteinate



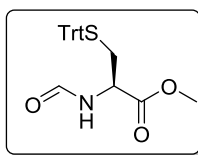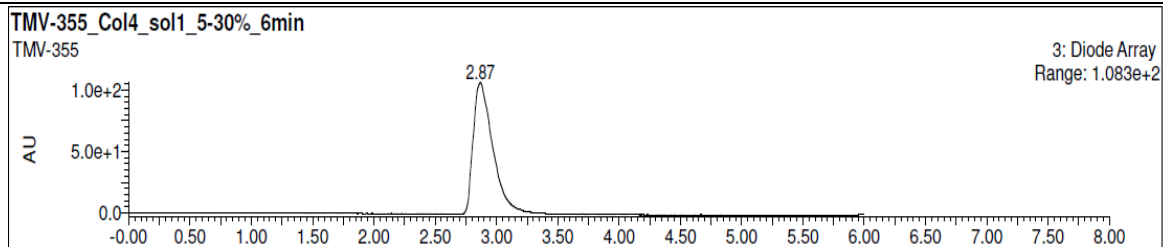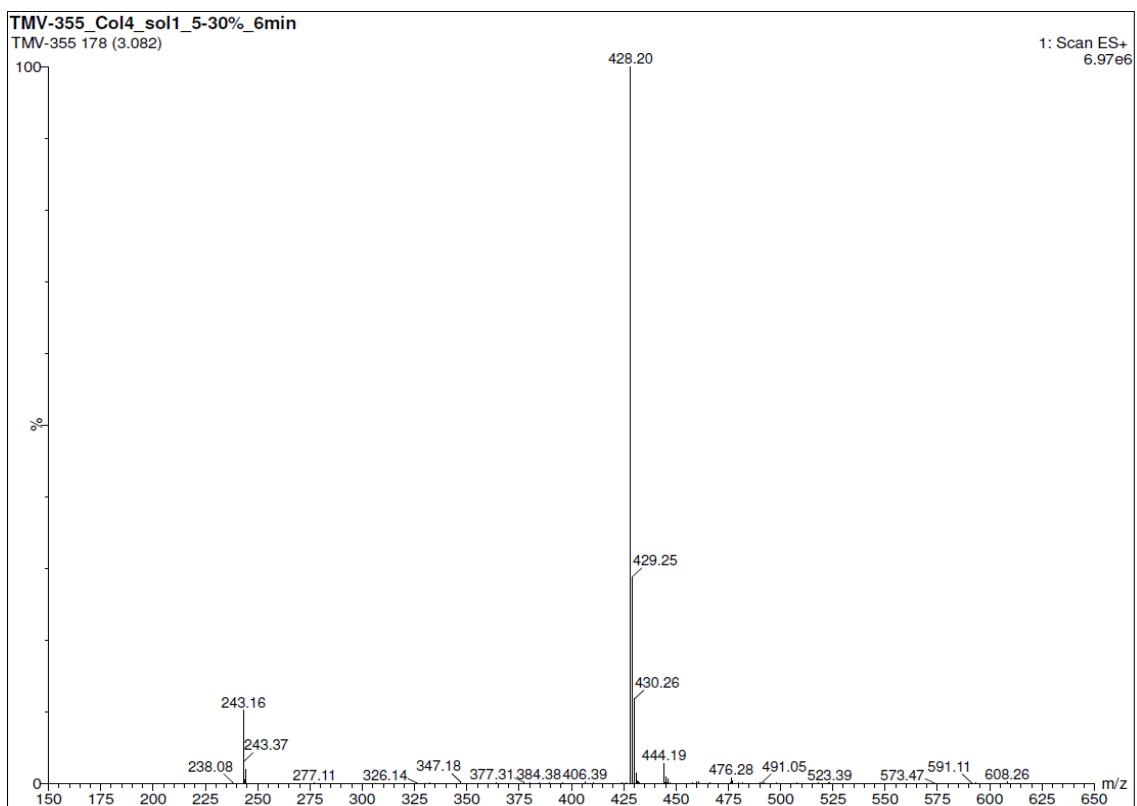

SFC-HPLC and ESI-MS of methyl N-formyl-S-trityl-L-cysteinate

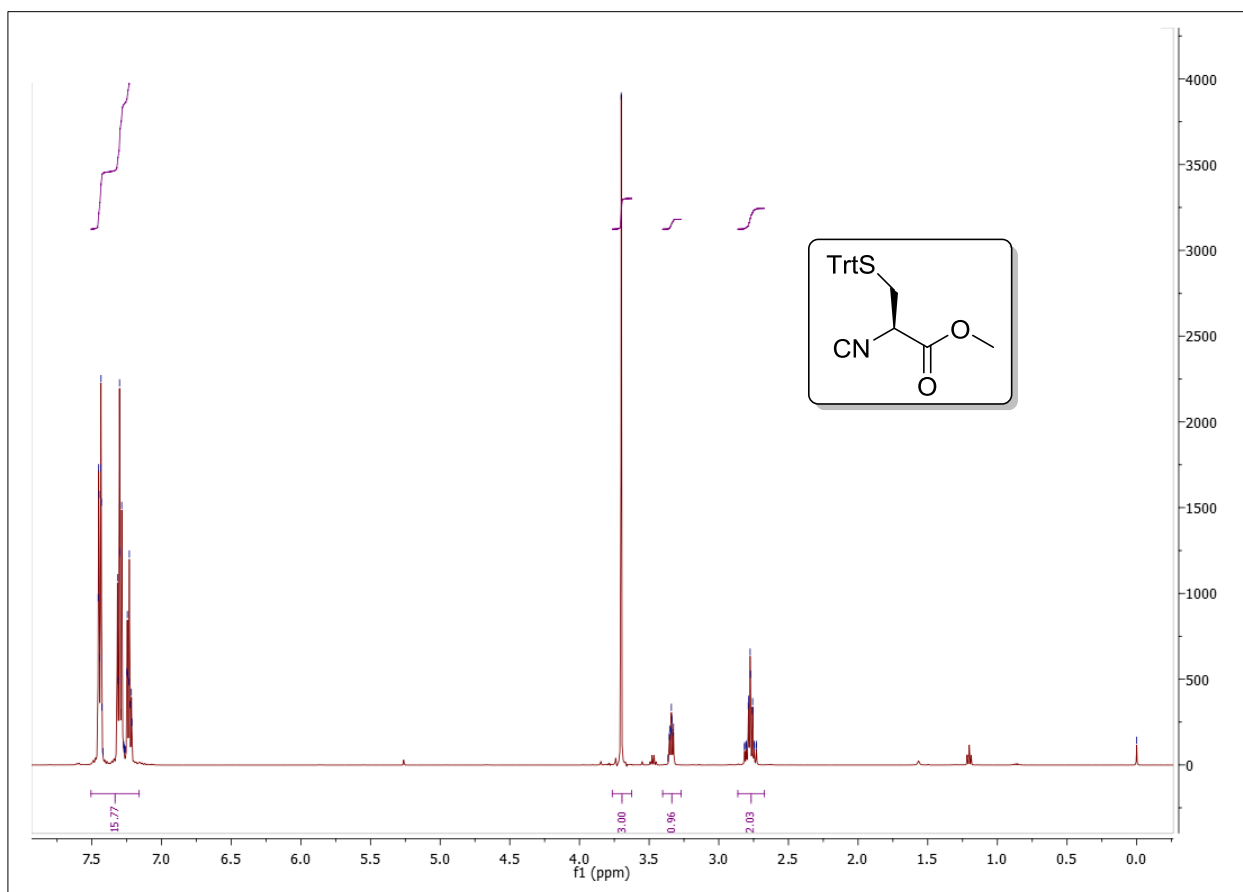

<sup>1</sup>H NMR of methyl (R)-2-isocyano-3-(tritylthio)propanoate

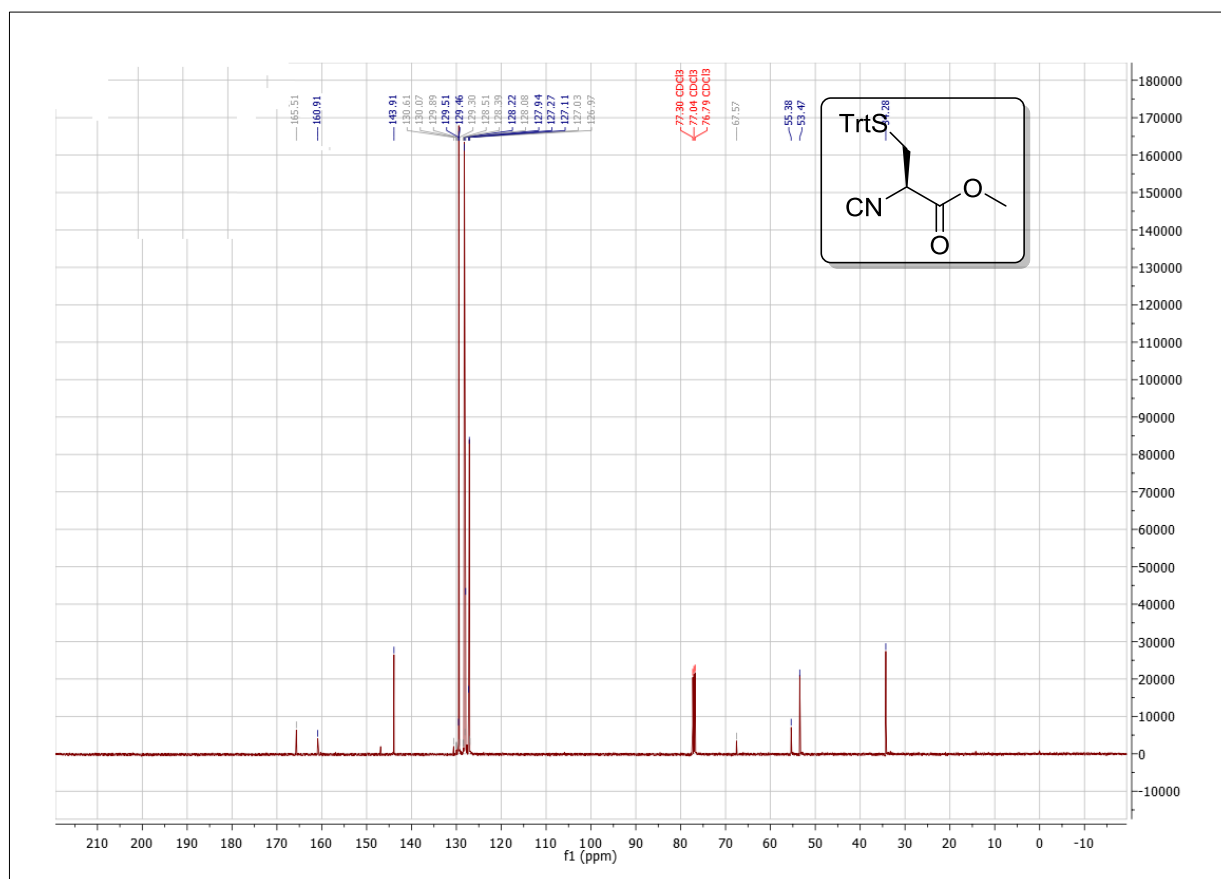

<sup>13</sup>C NMR of methyl (R)-2-isocyano-3-(tritylthio)propanoate

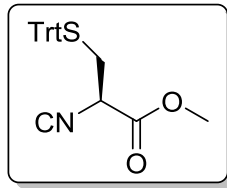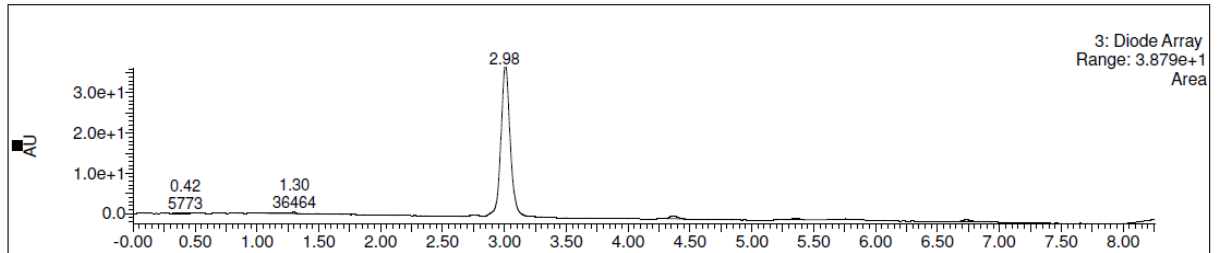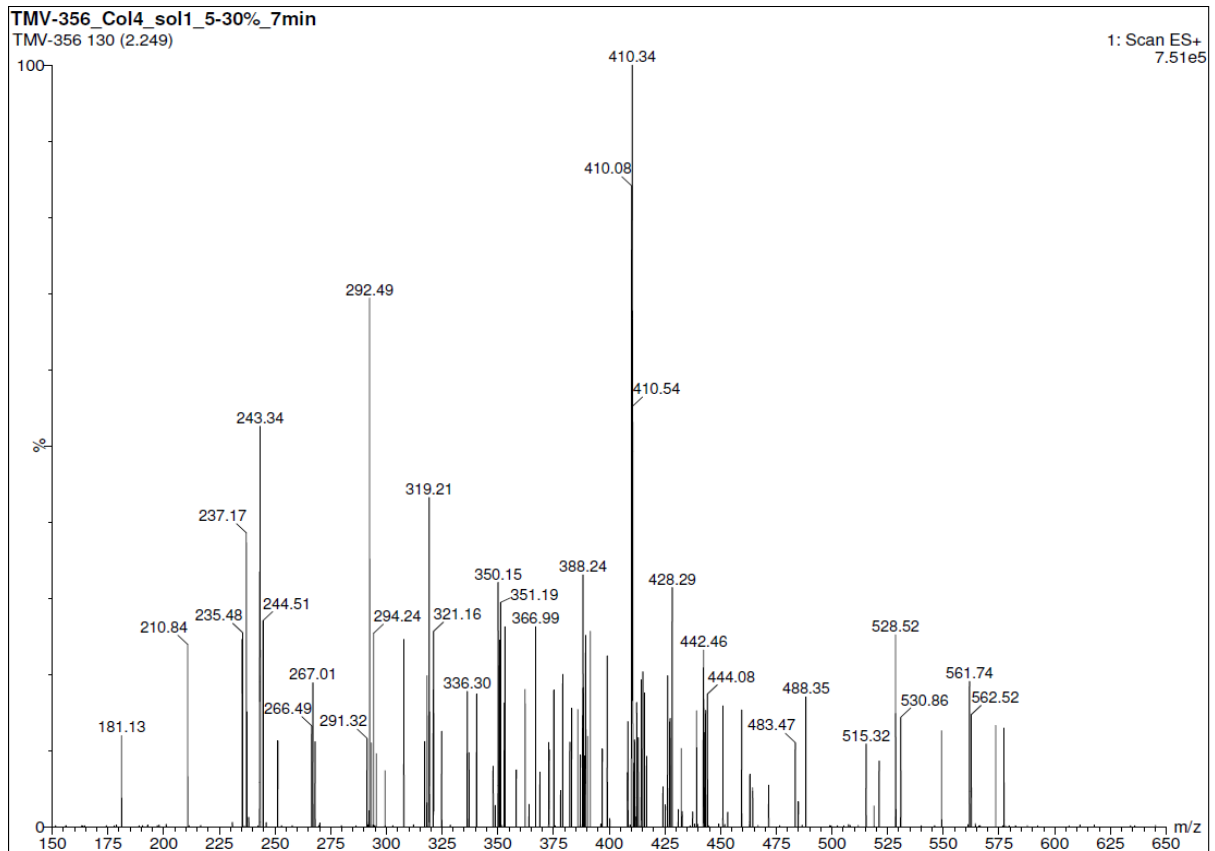

SFC-HPLC and ESI-MS of methyl (*R*)-2-isocyano-3-(tritylthio)propanoate

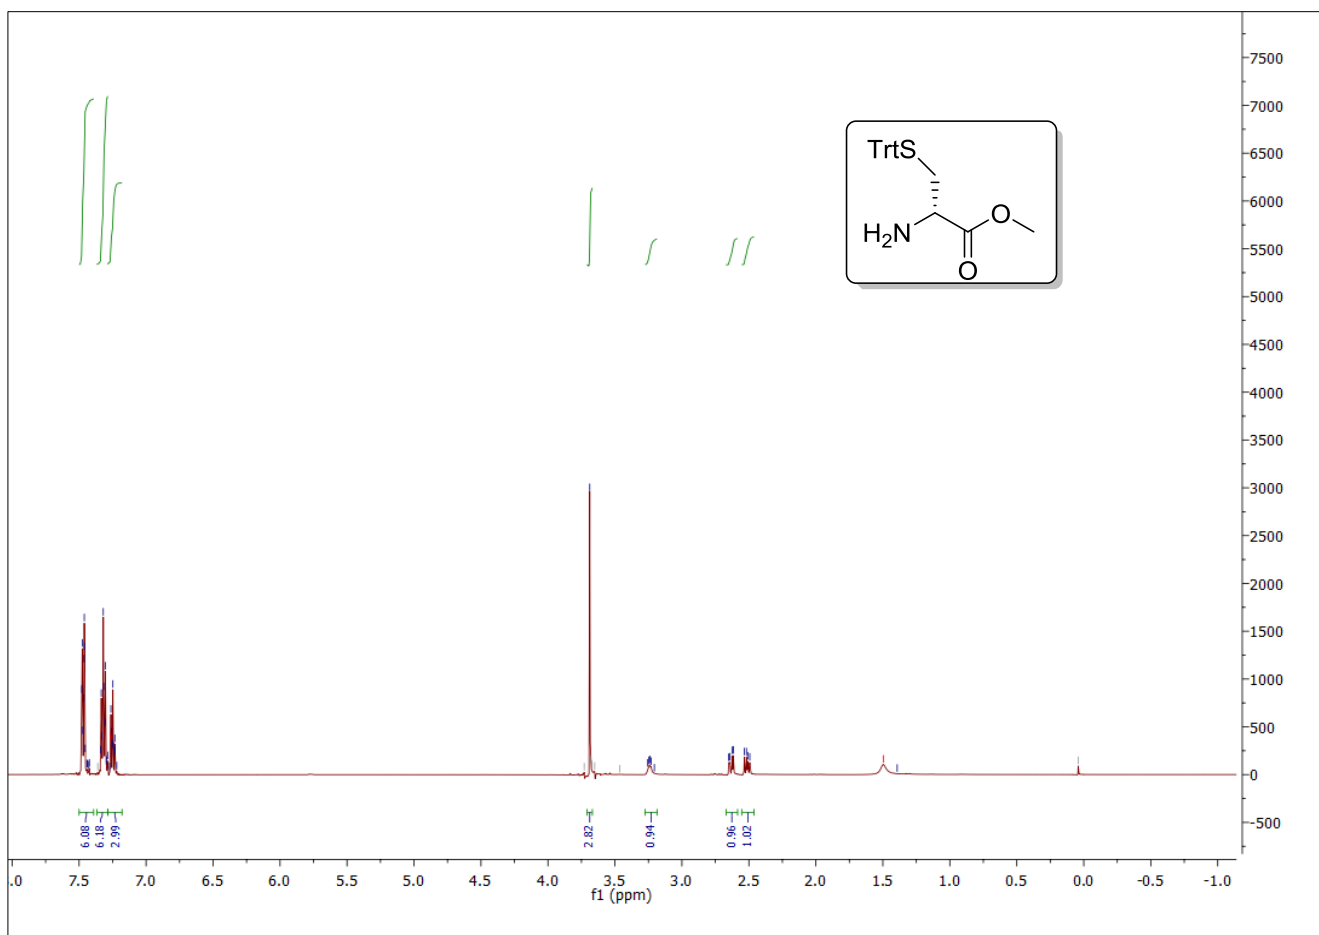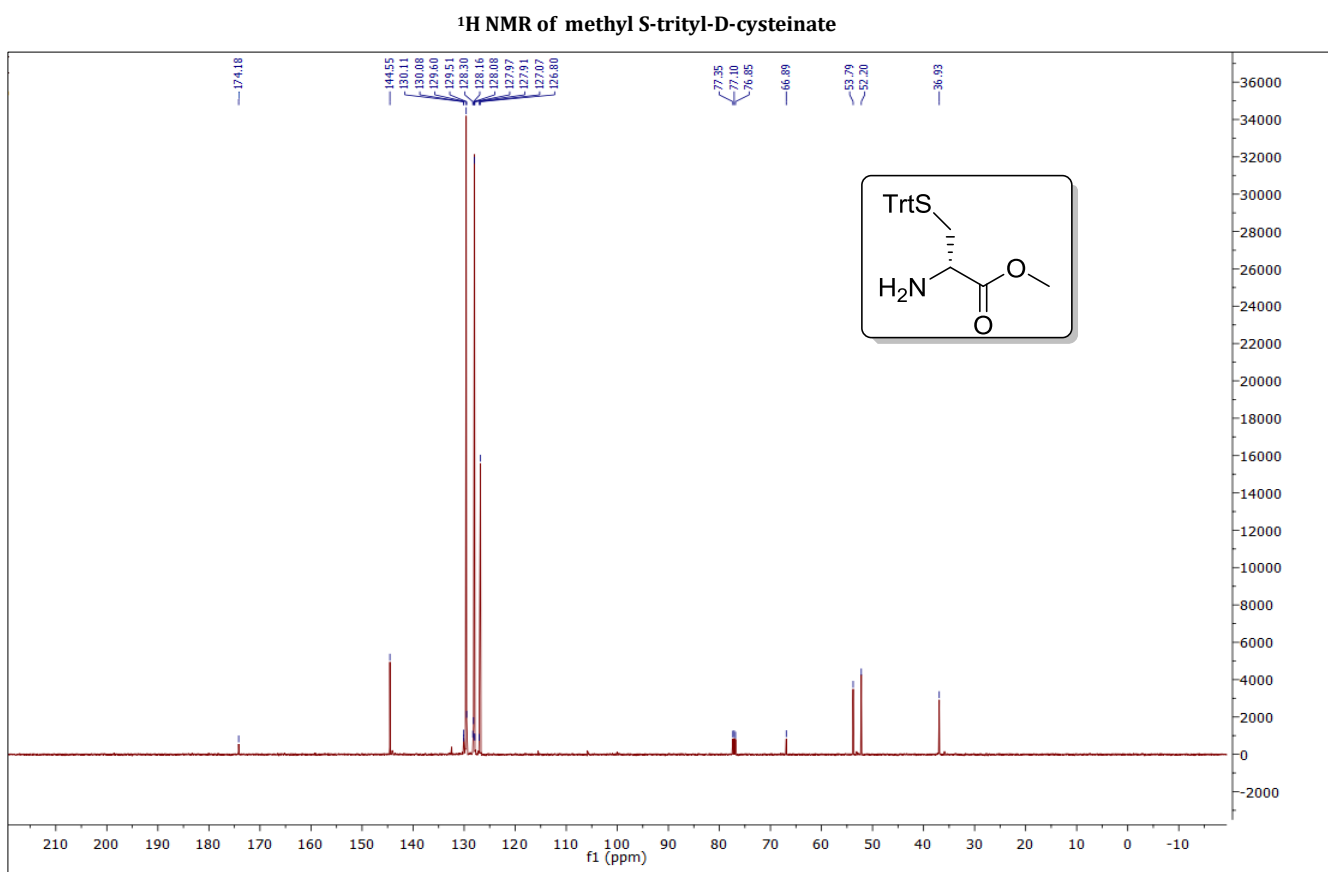

**<sup>13</sup>C NMR of methyl S-trityl-D-cysteinate**

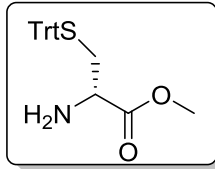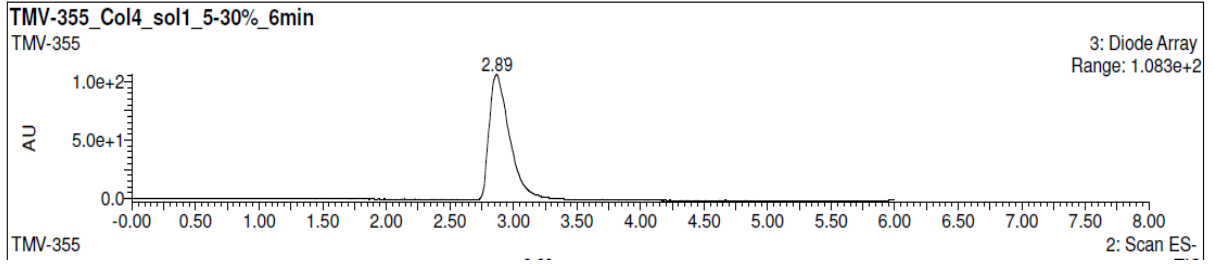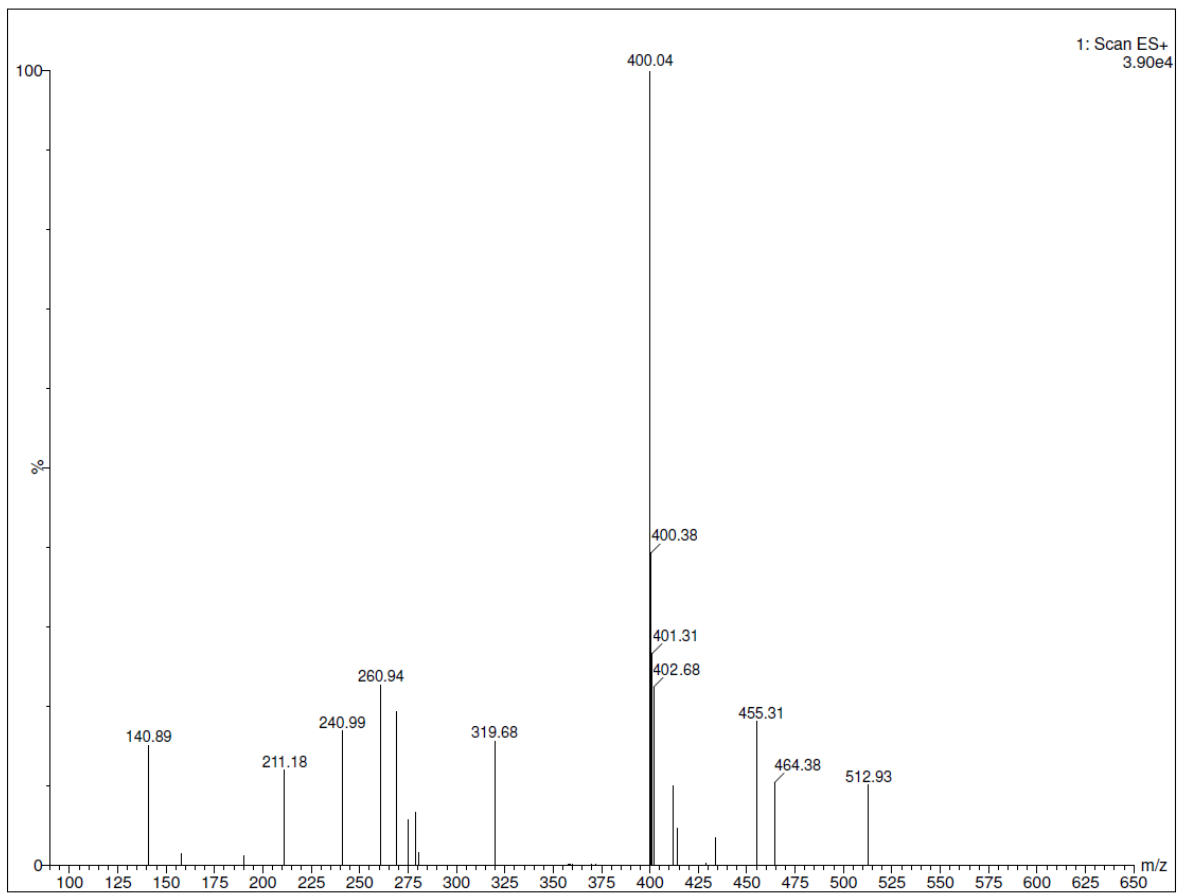

SFC-HPLC and ESI-MS of methyl S-trityl-D-cysteinate

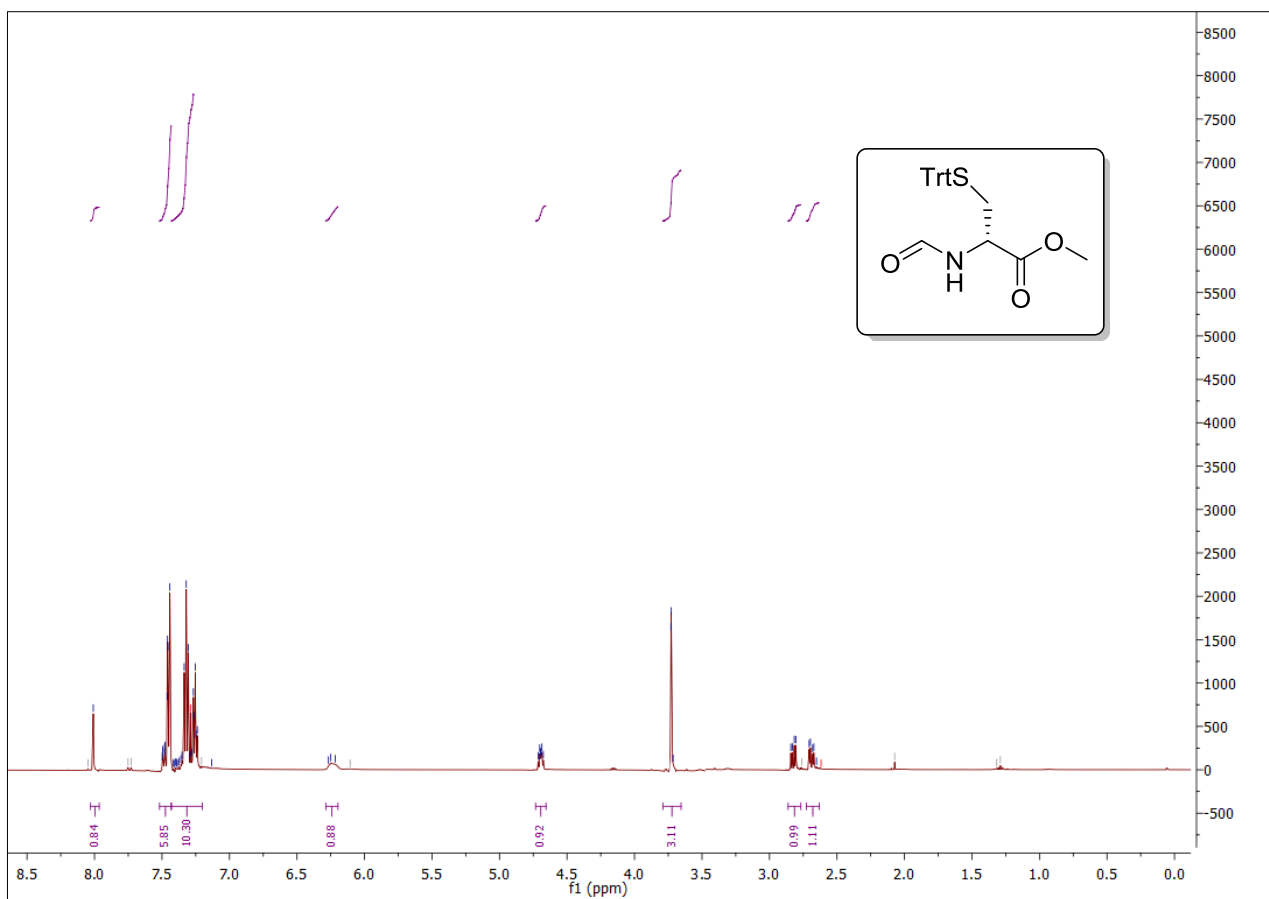

<sup>1</sup>H NMR of methyl N-formyl-S-trityl-D-cysteinate

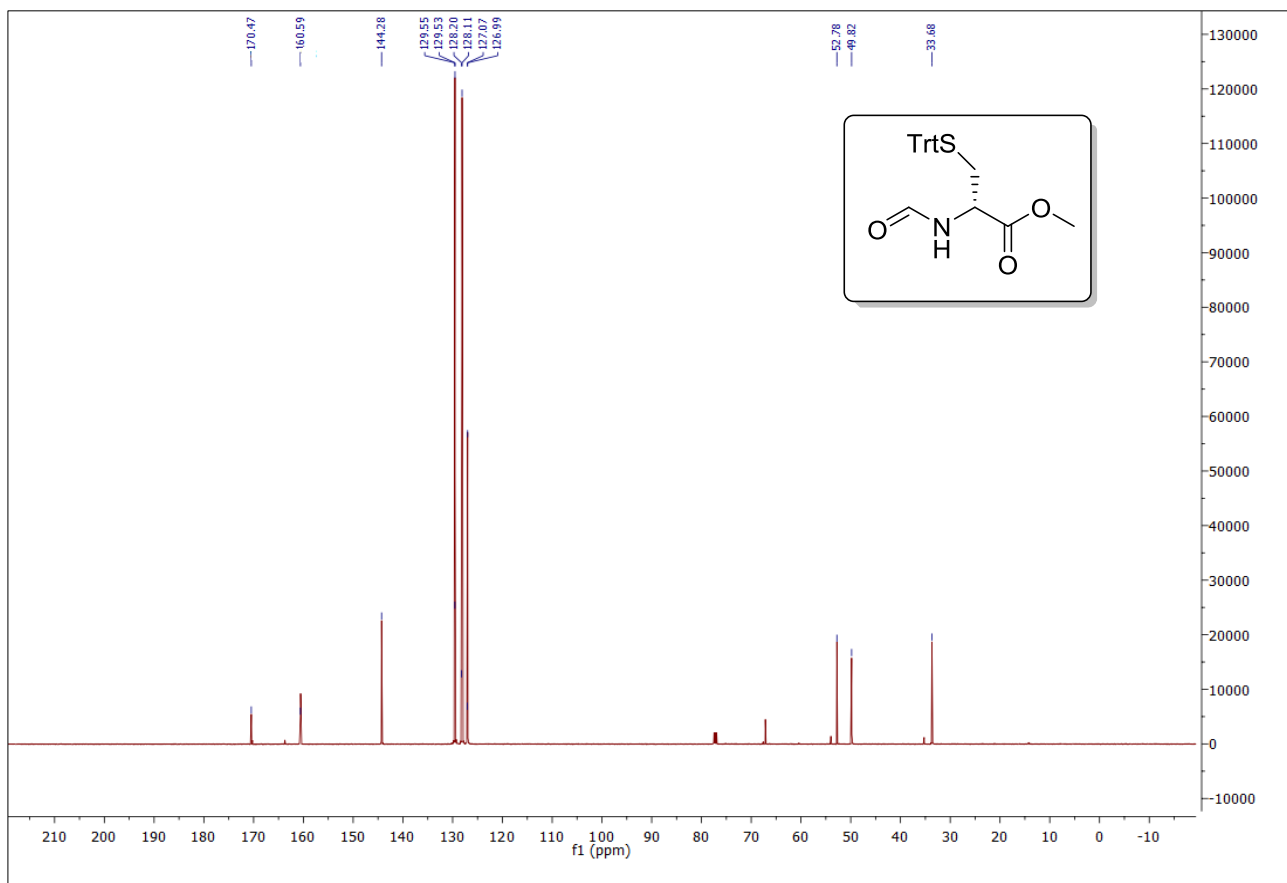

<sup>13</sup>C NMR of methyl N-formyl-S-trityl-D-cysteinate

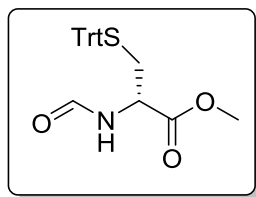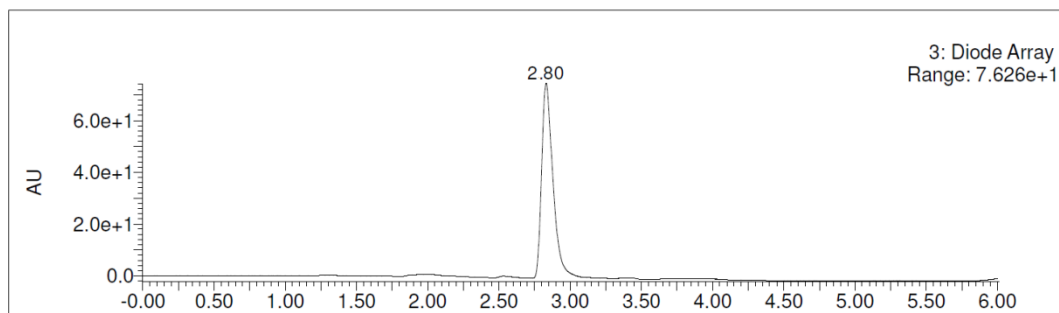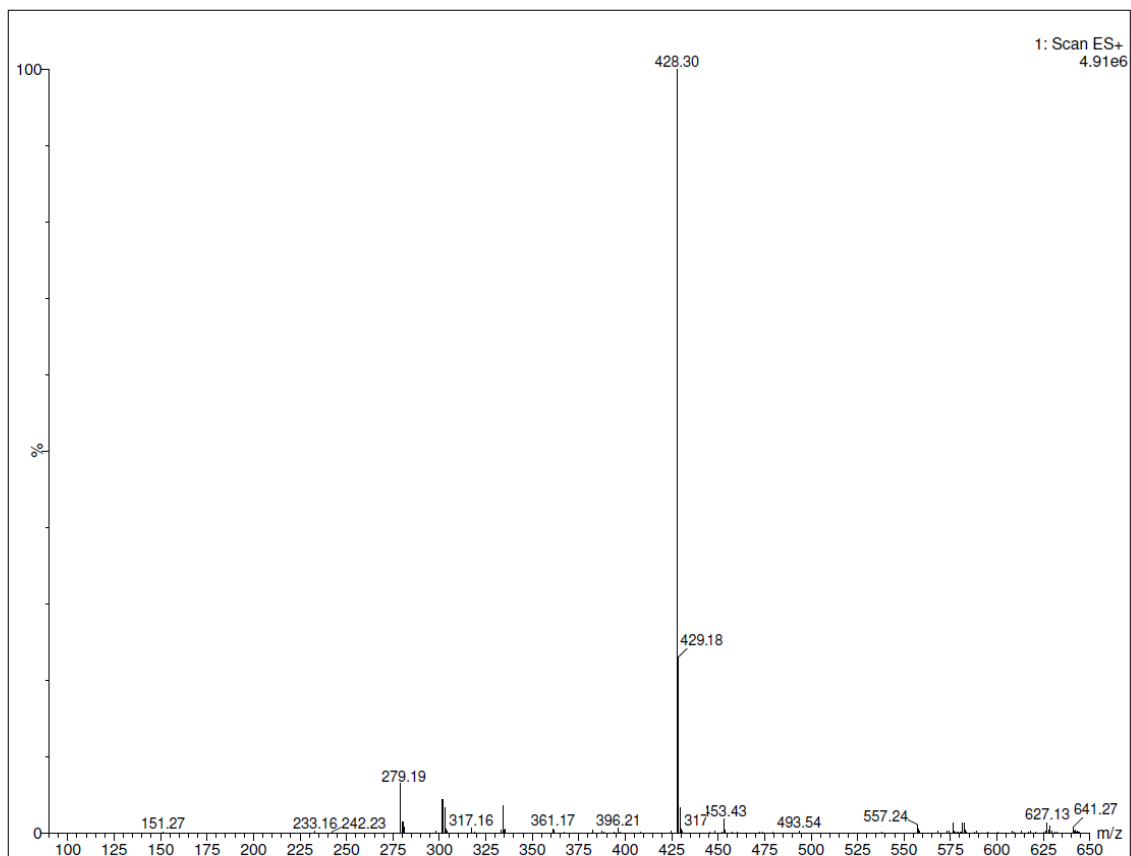

SFC-HPLC and ESI-MS of methyl N-formyl-S-trityl-D-cysteinate

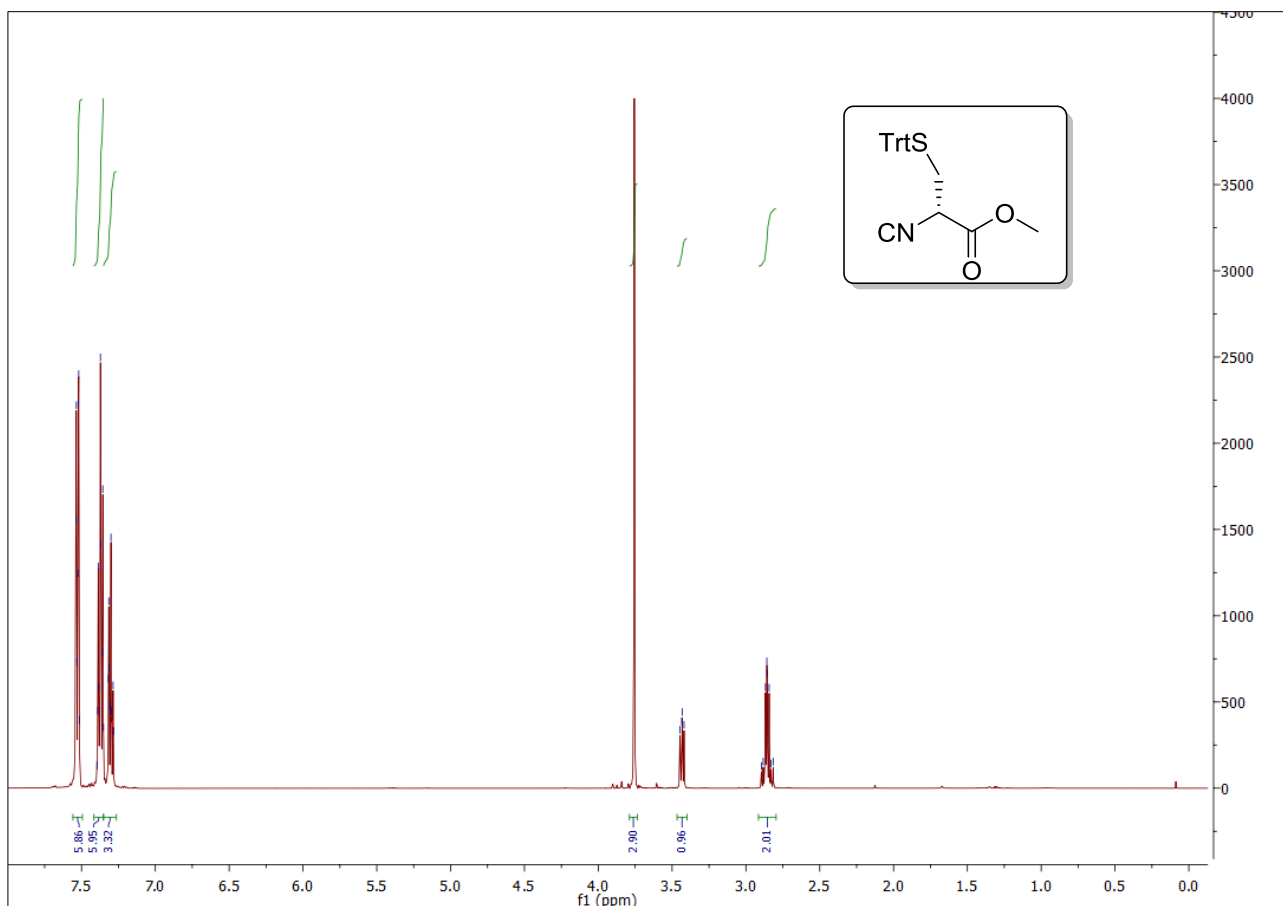

<sup>1</sup>H NMR of methyl (S)-2-isocyano-3-(tritylthio)propanoate

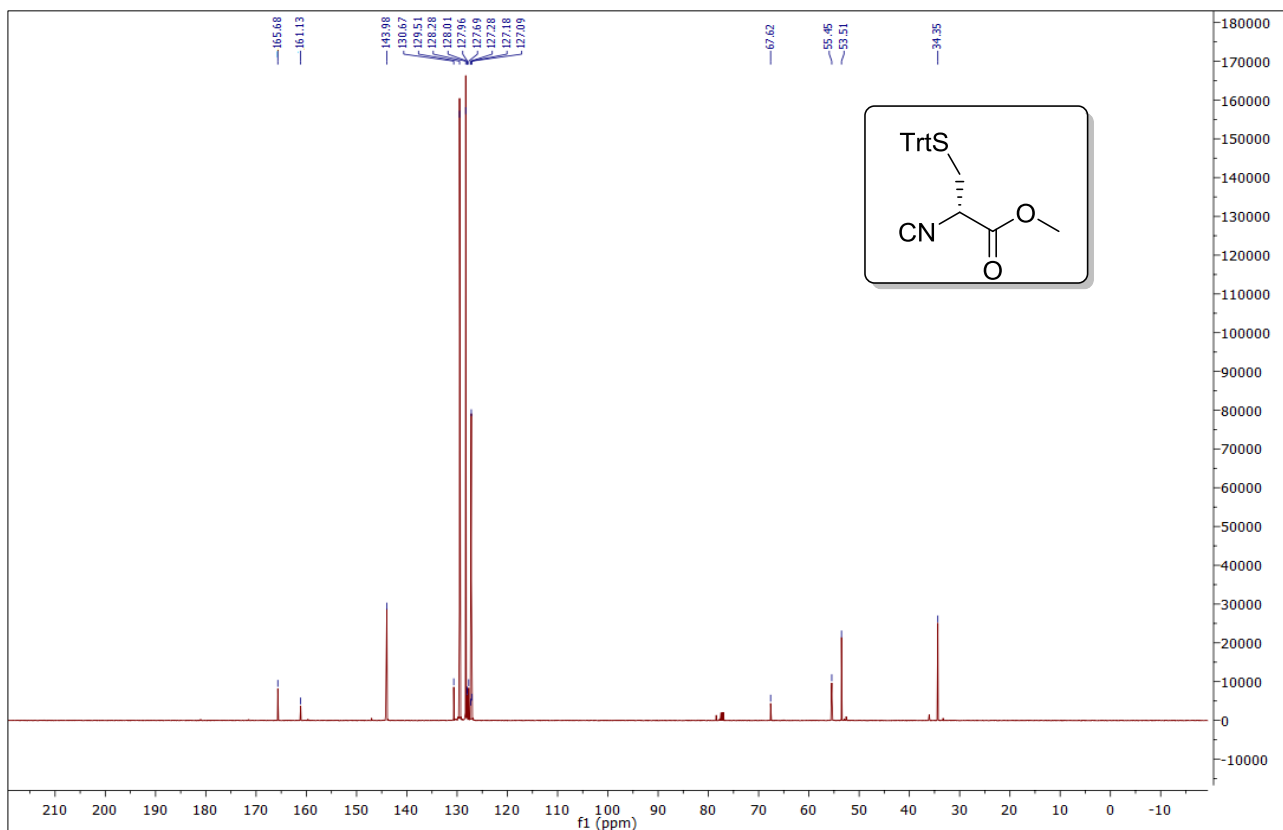

<sup>13</sup>C NMR of methyl (S)-2-isocyano-3-(tritylthio)propanoate



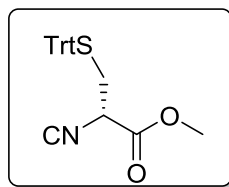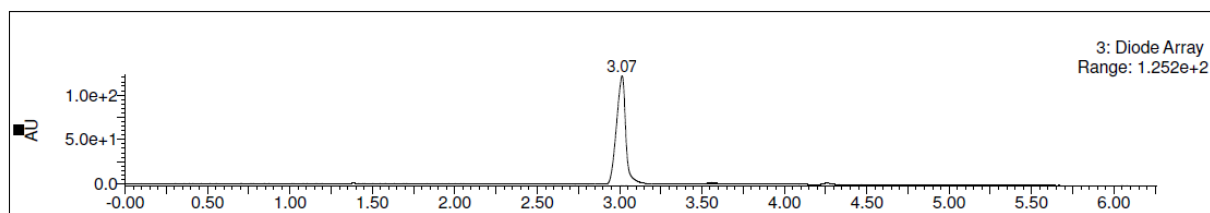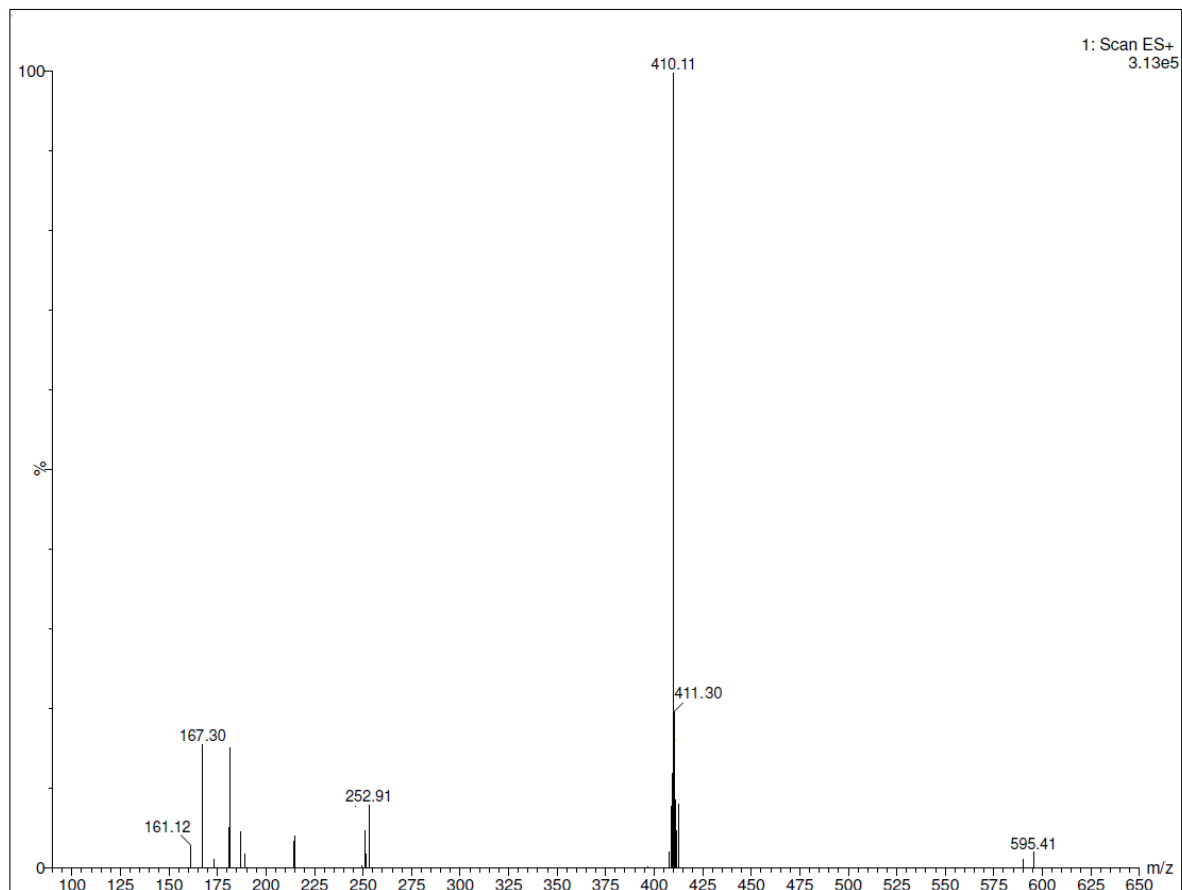

SFC-HPLC and ESI-MS of methyl (S)-2-isocyano-3-(tritylthio)propanoate

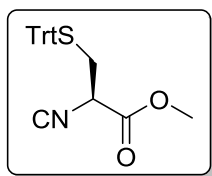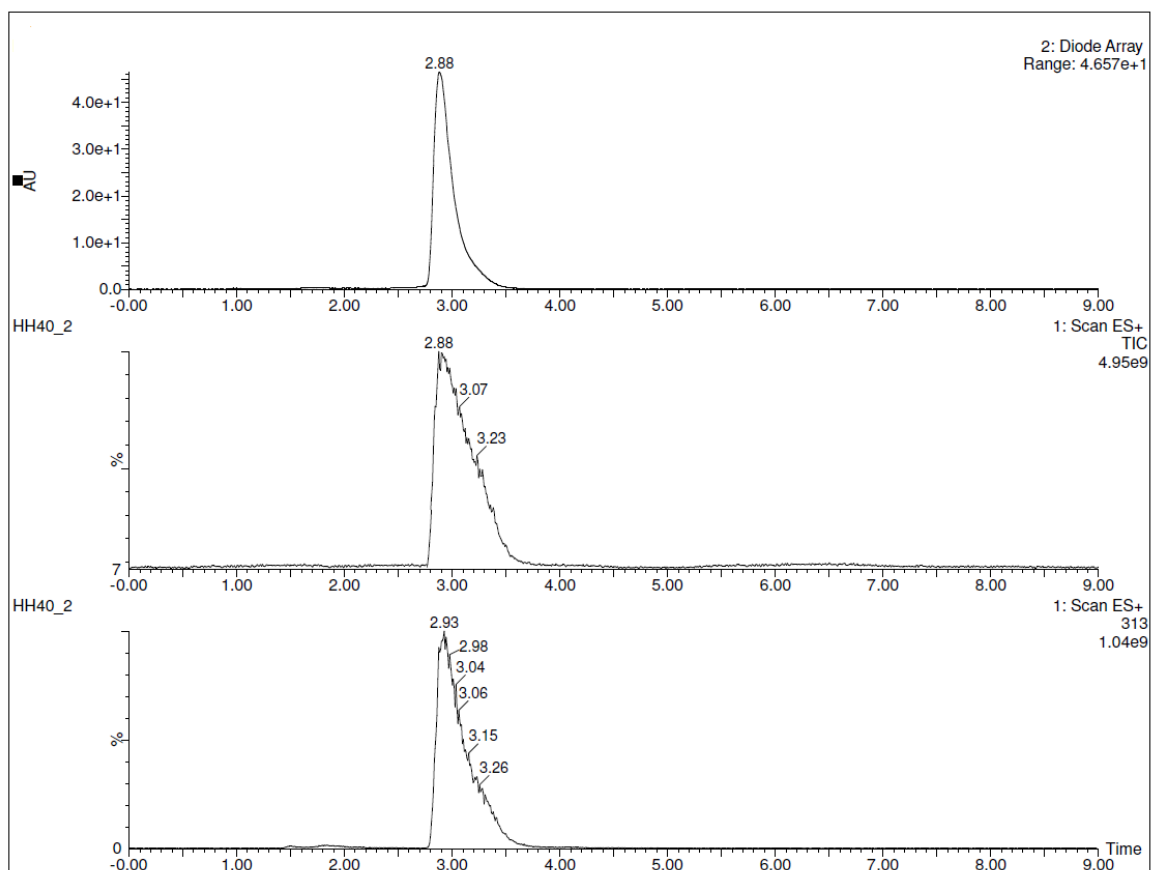

**Chiral SFC-HPLC chromatogram of enantiopure methyl (*R*)-2-isocyano-3-(tritylthio)propanoate.**  
**Method:** Reprosil Chiral-AM column (4.6 × 250 mm, 5 $\mu$ m) with 5 - 30% MeOH in CO<sub>2</sub> for 9 min;  
 $\gamma$  = 254 nm.

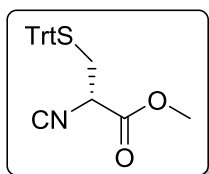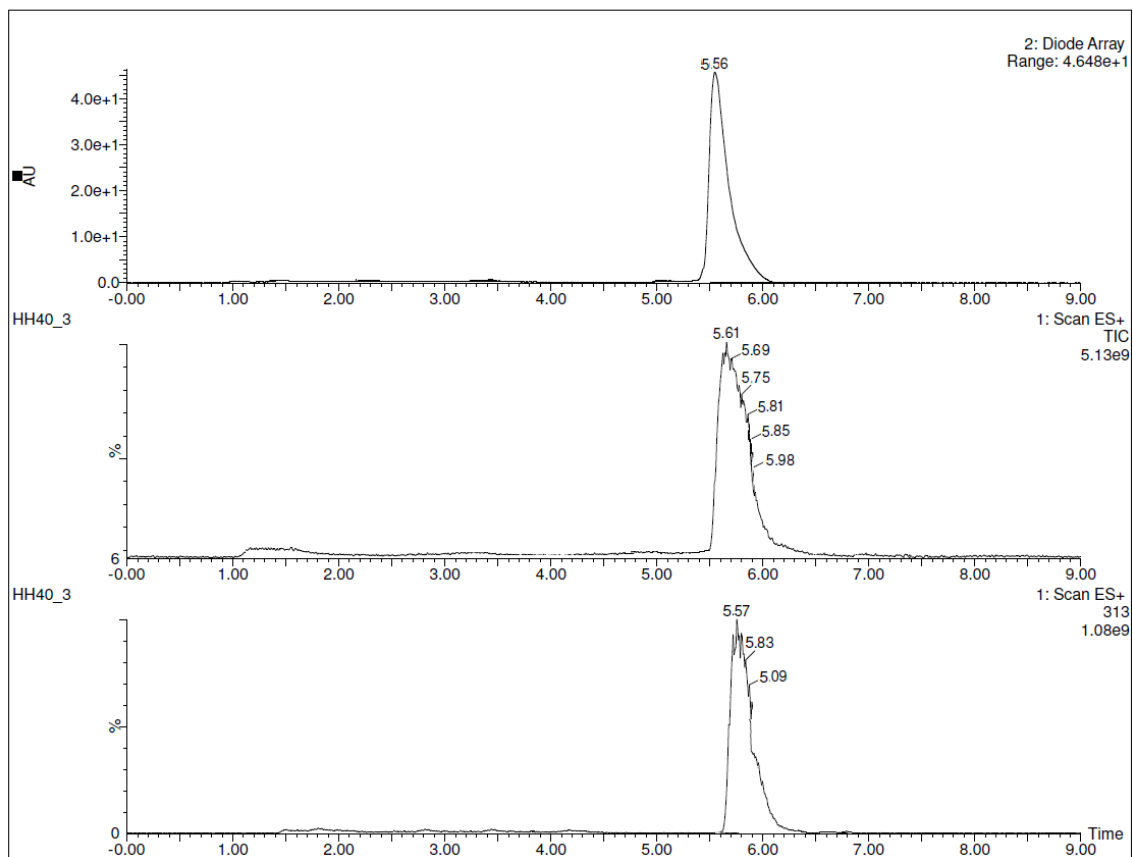

**Chiral SFC-HPLC chromatogram of enantiopure methyl (S)-2-isocyano-3-(tritylthio)propanoate**  
**Method:** Reprosil Chiral-AM column (4.6 × 250 mm, 5 $\mu$ m) with 5 - 30% MeOH in CO<sub>2</sub> for 9 min;  
 $\gamma$  = 254 nm.



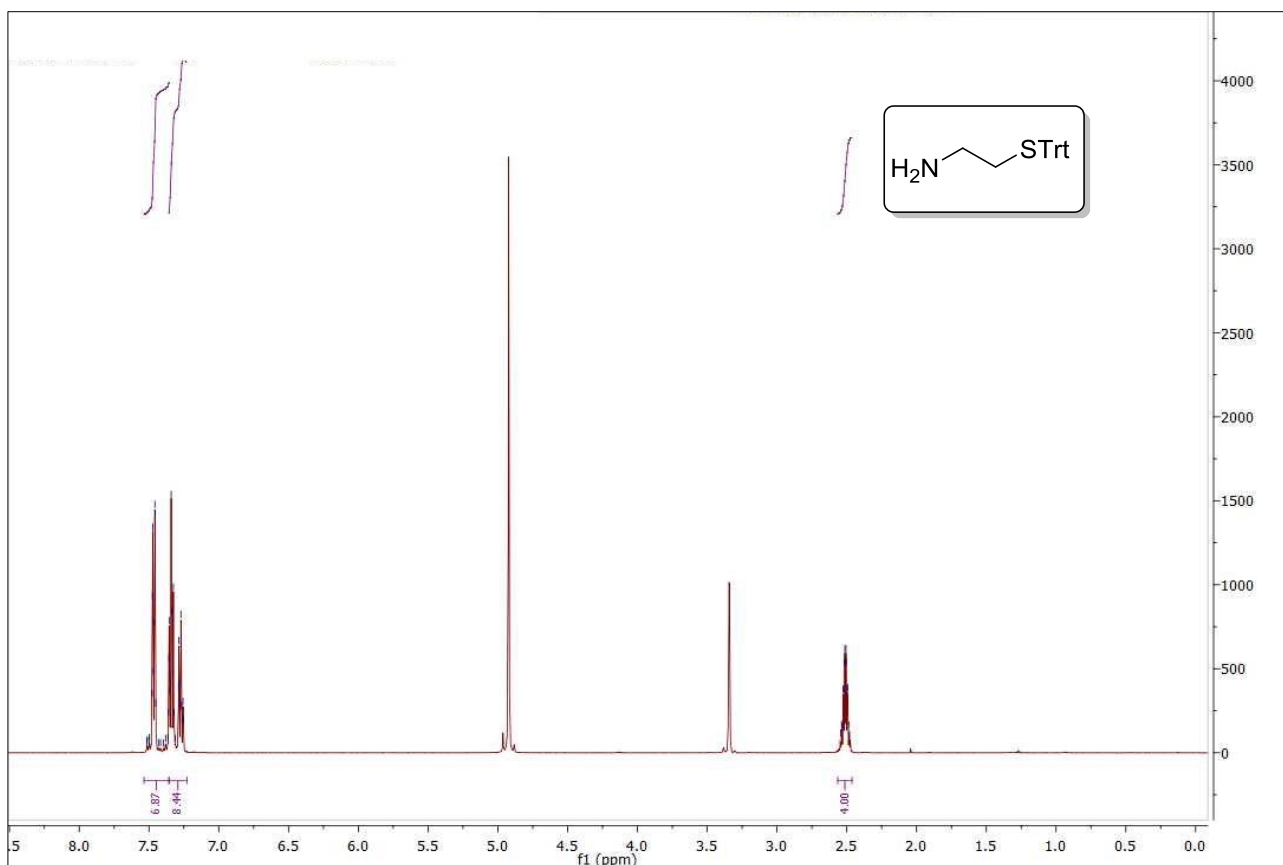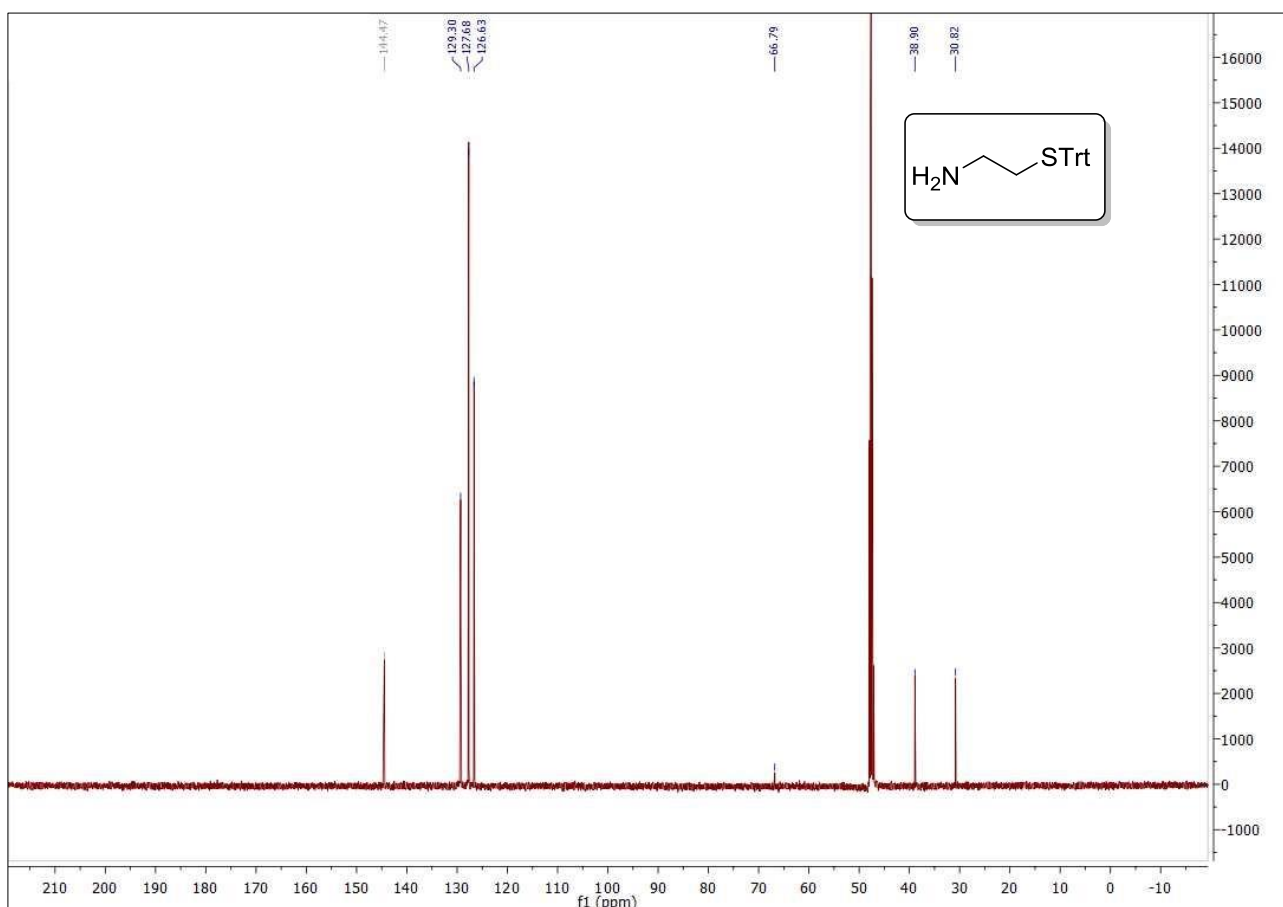

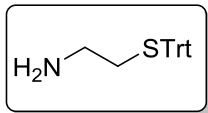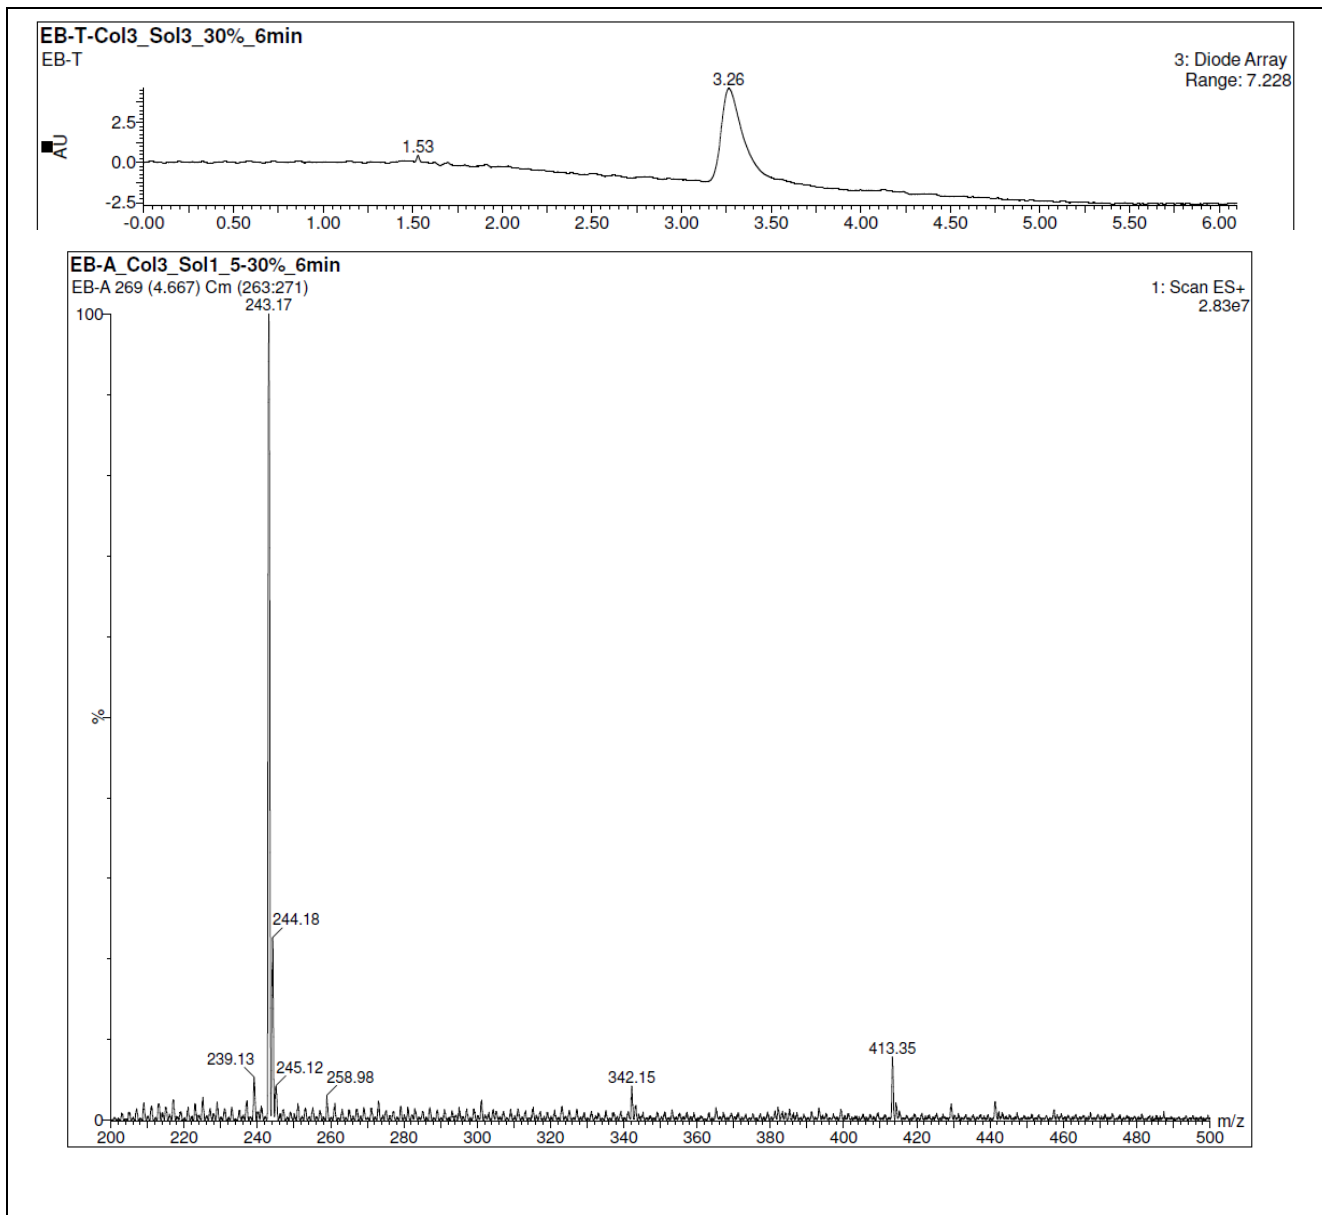

SFC-HPLC and ESI-MS of 2-(tritylsulfanyl)ethanamine

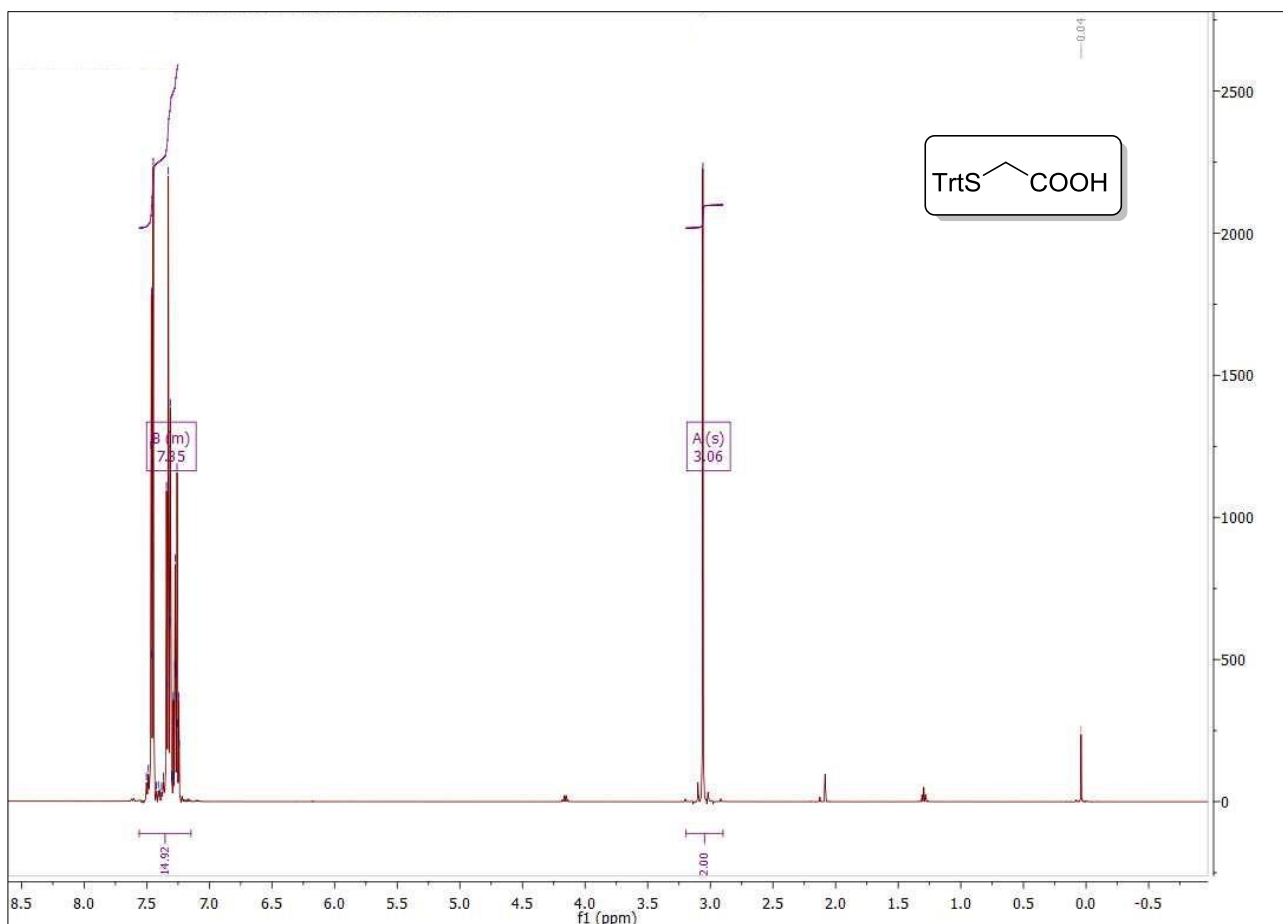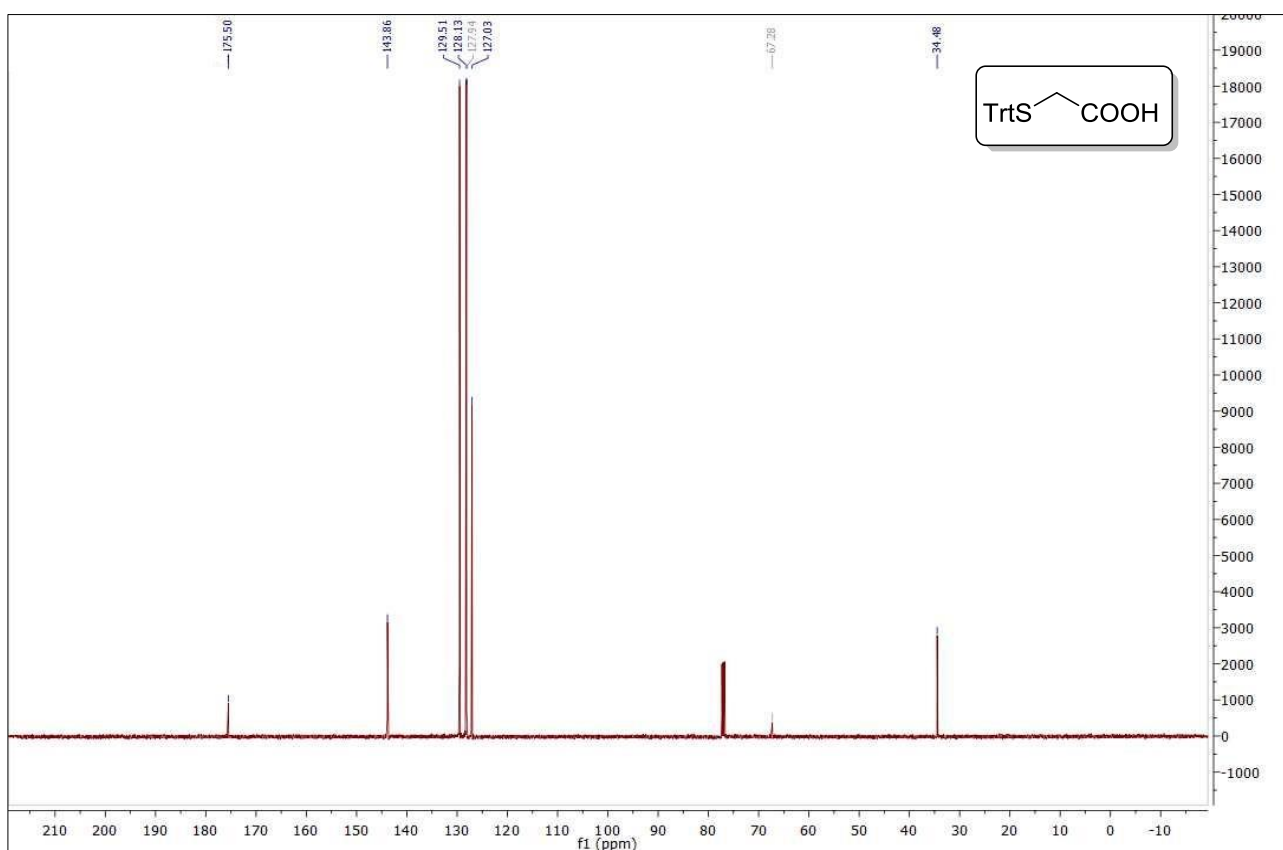

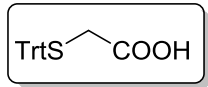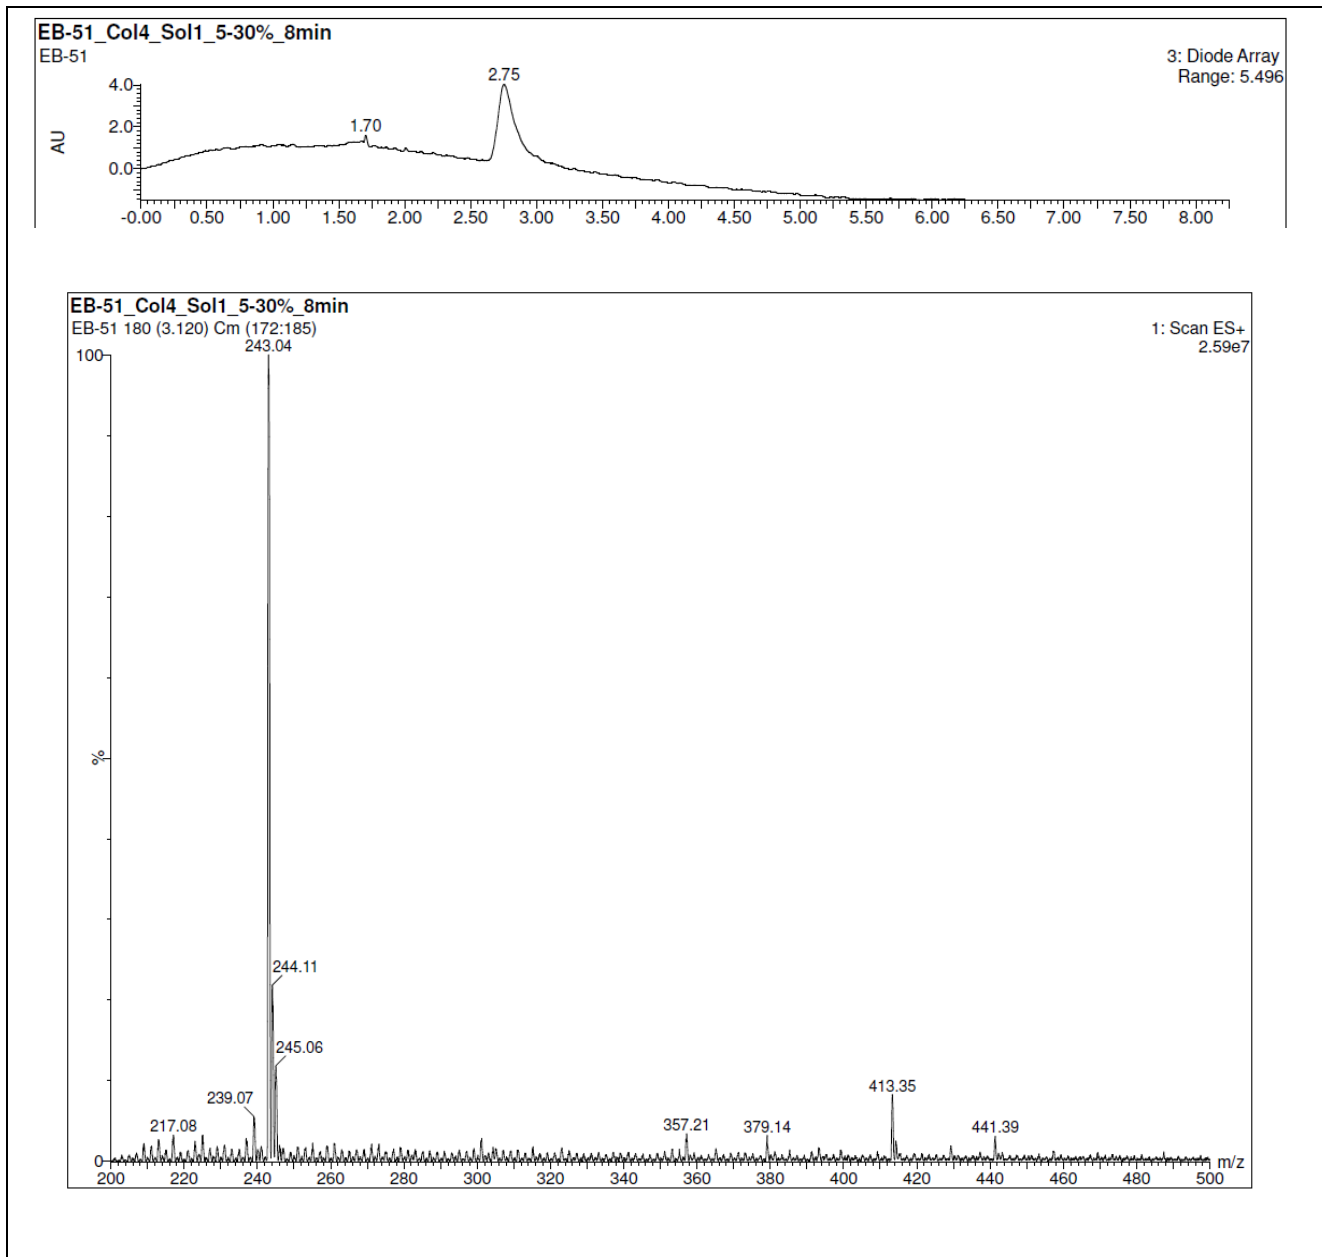

SFC-HPLC and ESI-MS of 2-(tritylsulfanyl)ethanamine 2-(tritylthio)acetic acid



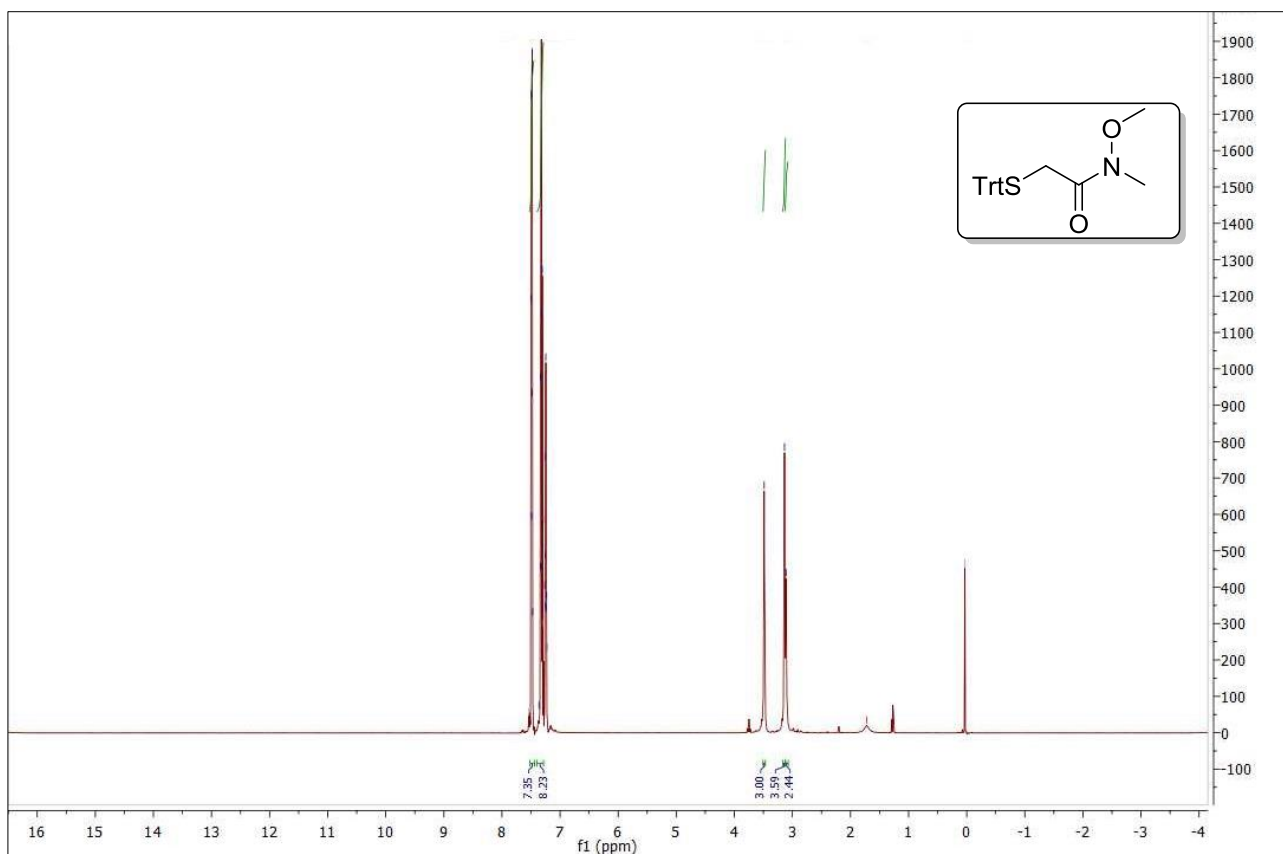

<sup>1</sup>H NMR of N-methoxy-N-methyl-2-(tritylthio)acetamide

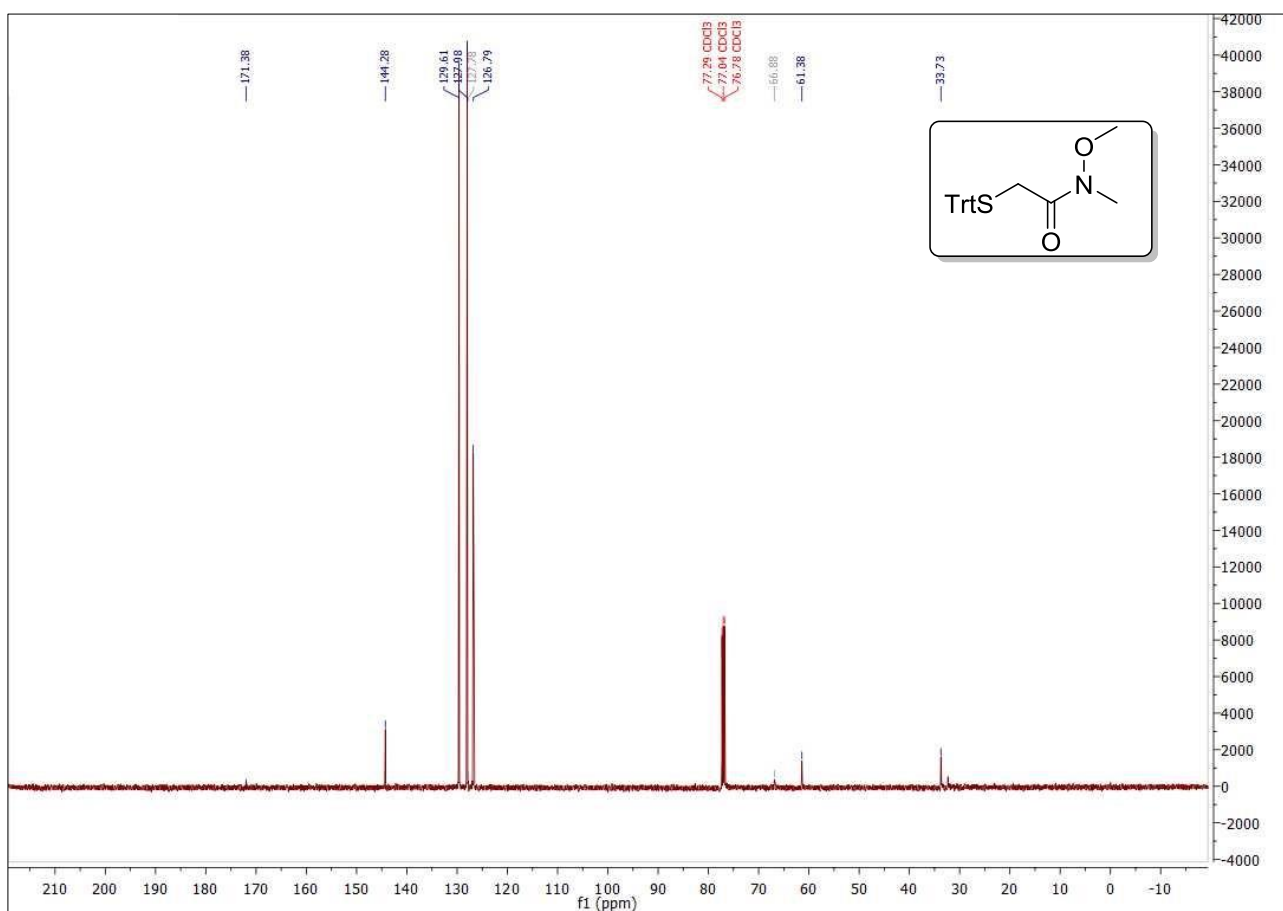

<sup>13</sup>C NMR of N-methoxy-N-methyl-2-(tritylthio)acetamide

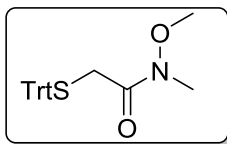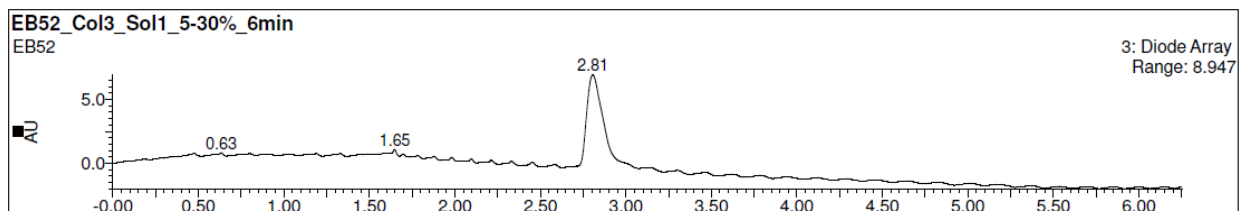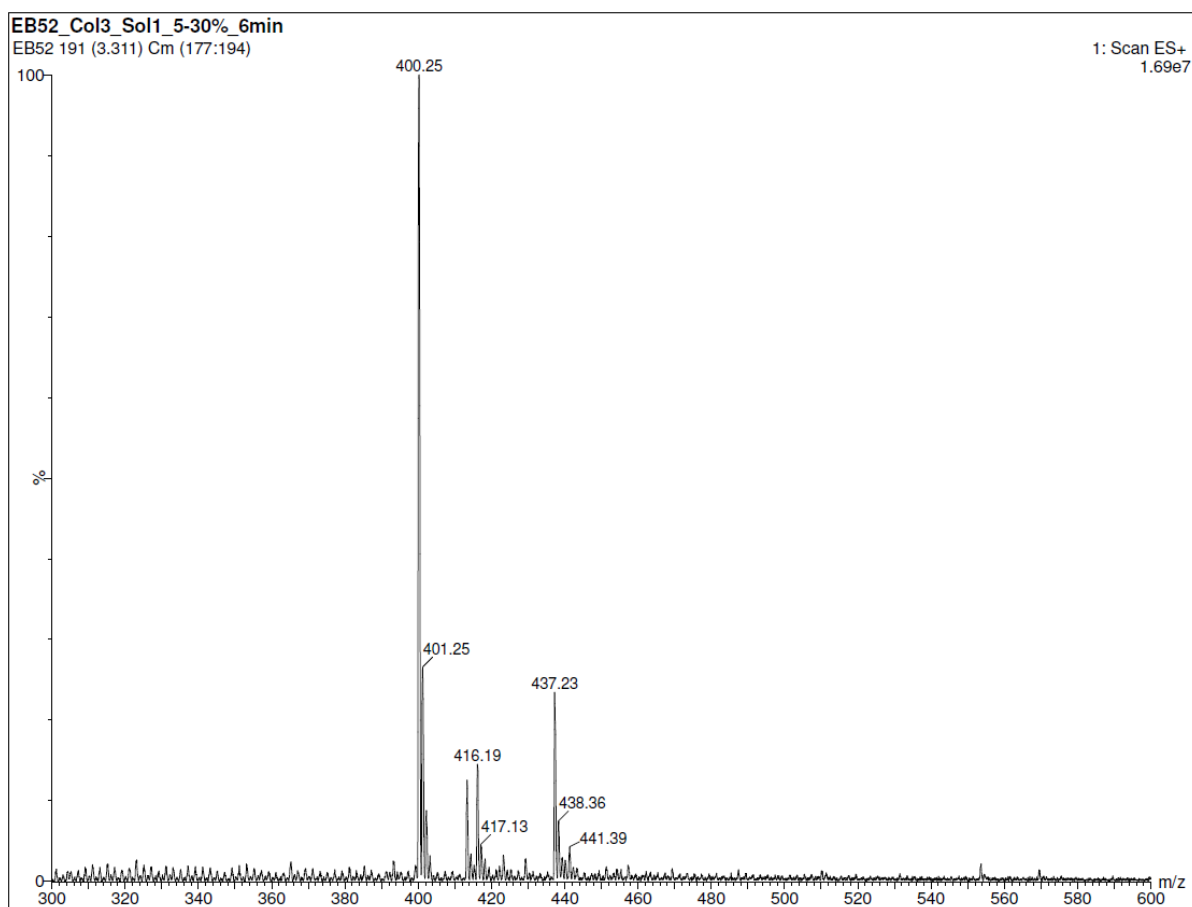

SFC-HPLC and ESI-MS of N-methoxy-N-methyl-2-(tritylthio)acetamide

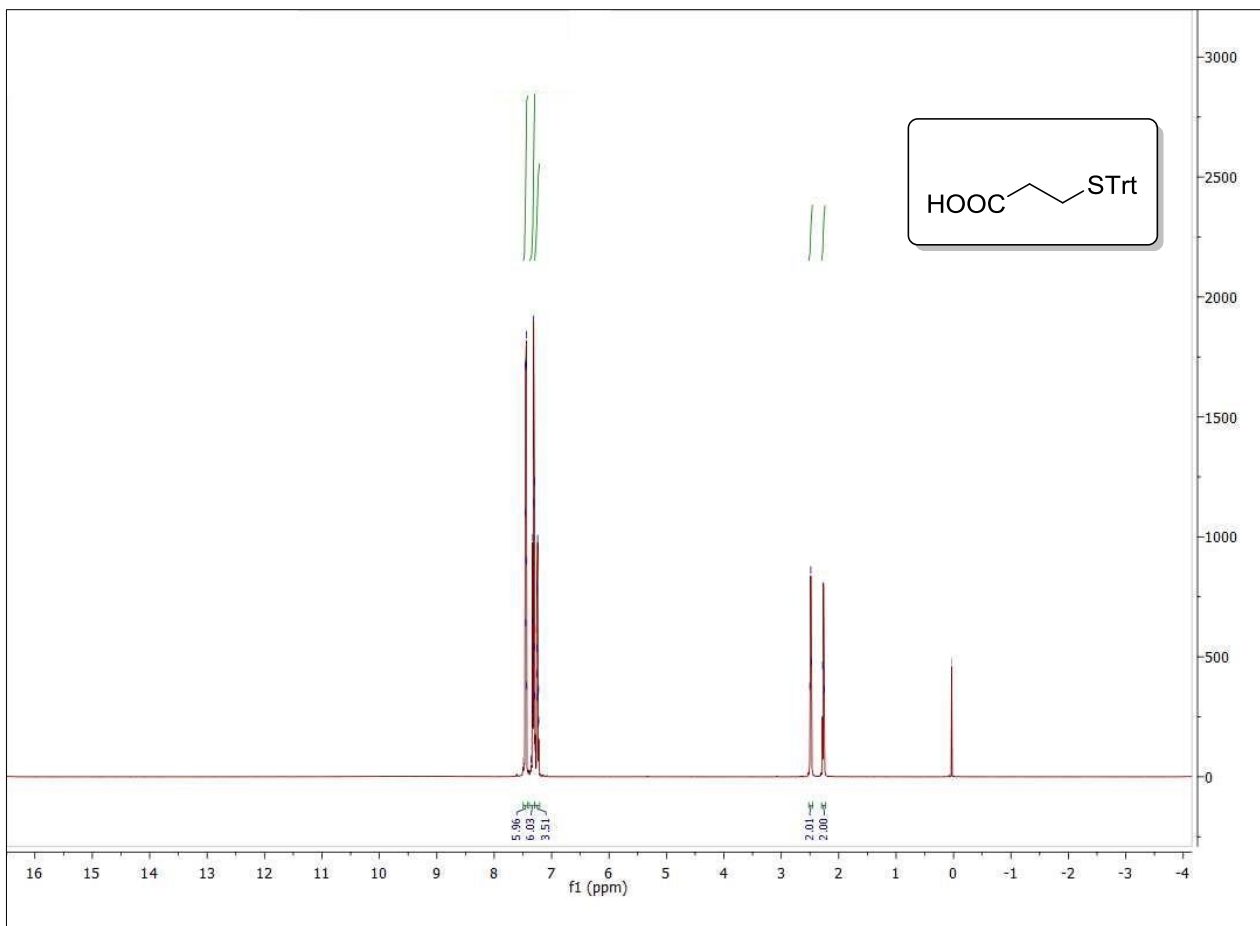

<sup>1</sup>H NMR of 3-(tritylthio)propanoic acid

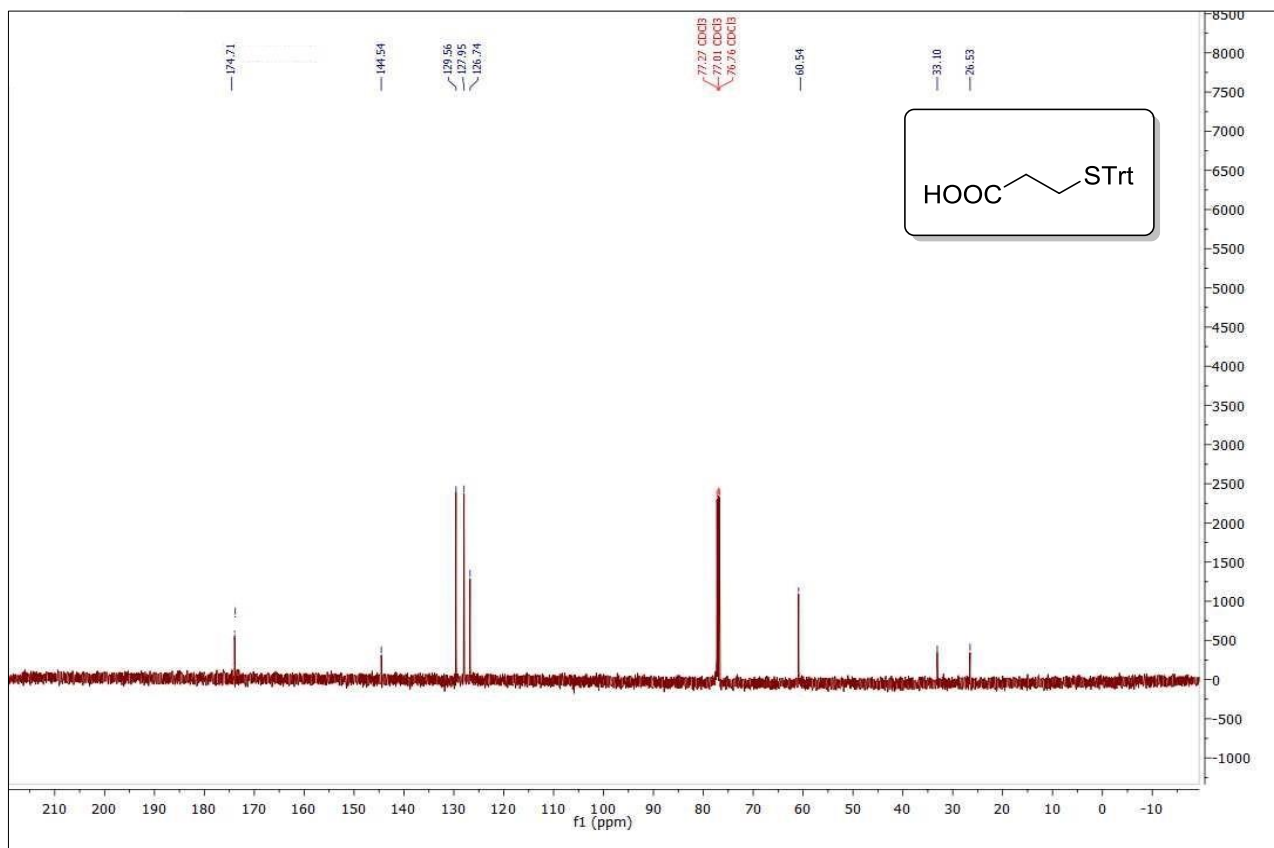

<sup>13</sup>C NMR of 3-(tritylthio)propanoic acid

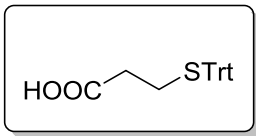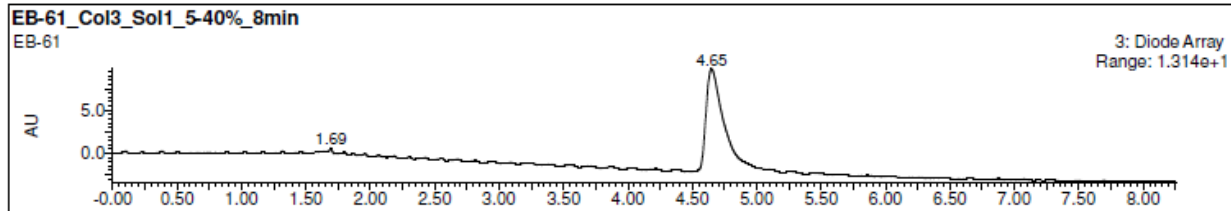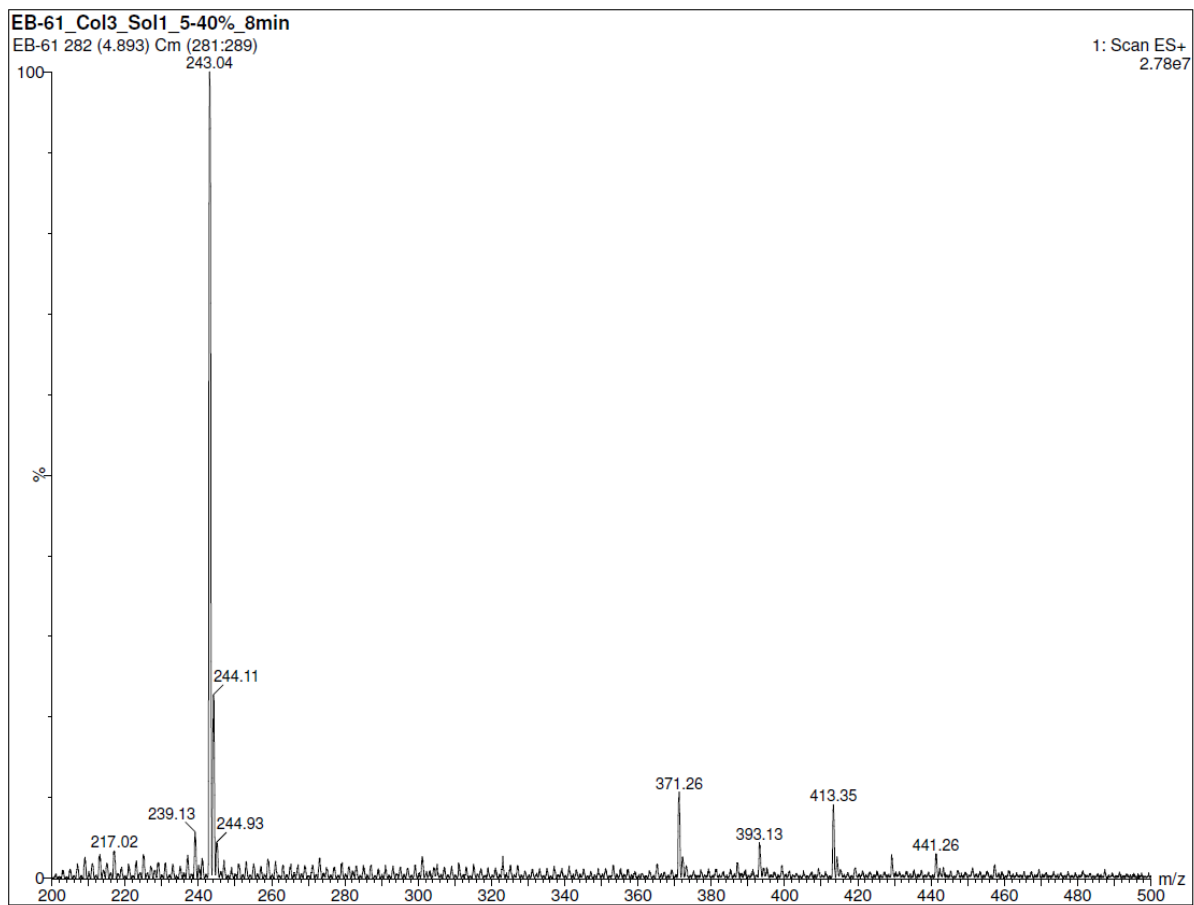

SFC-HPLC and ESI-MS of 3-(tritylthio)propanoic acid

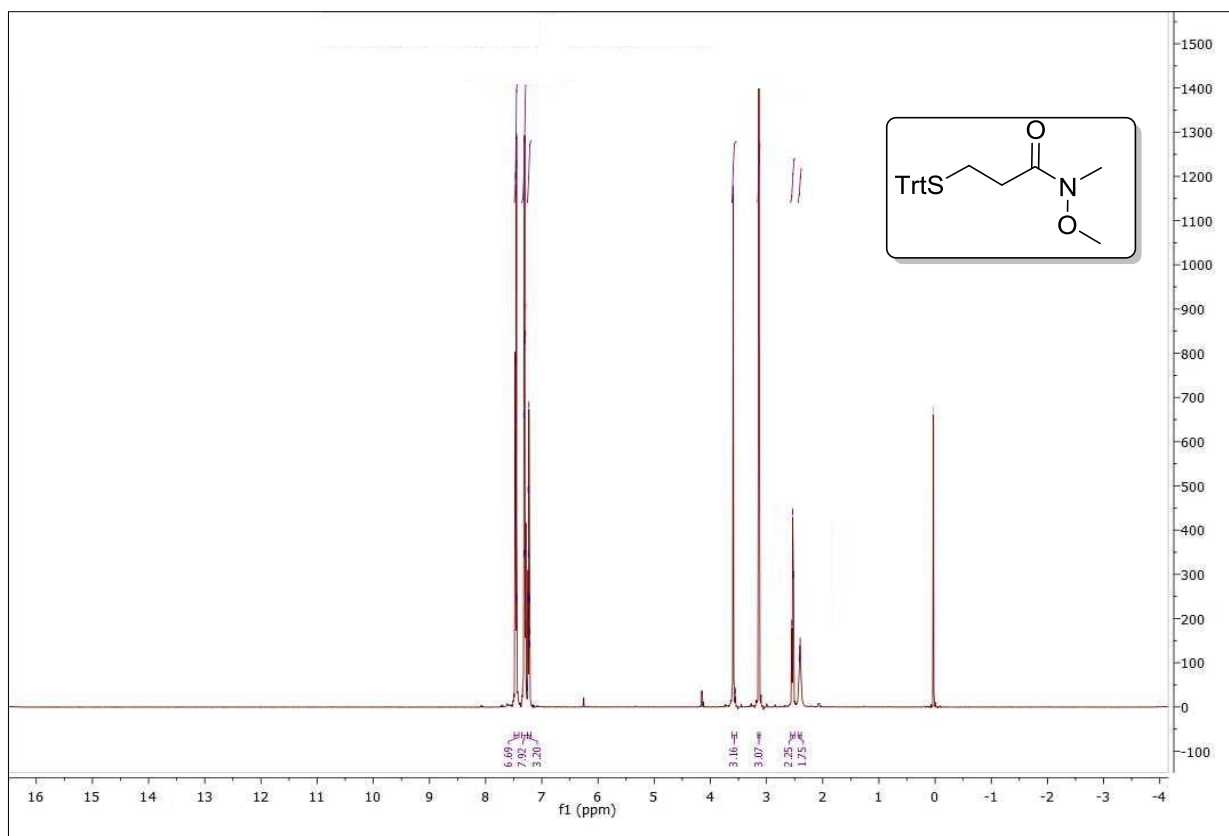

<sup>1</sup>H NMR of N-methoxy-N-methyl-3-(tritylthio)propanamide

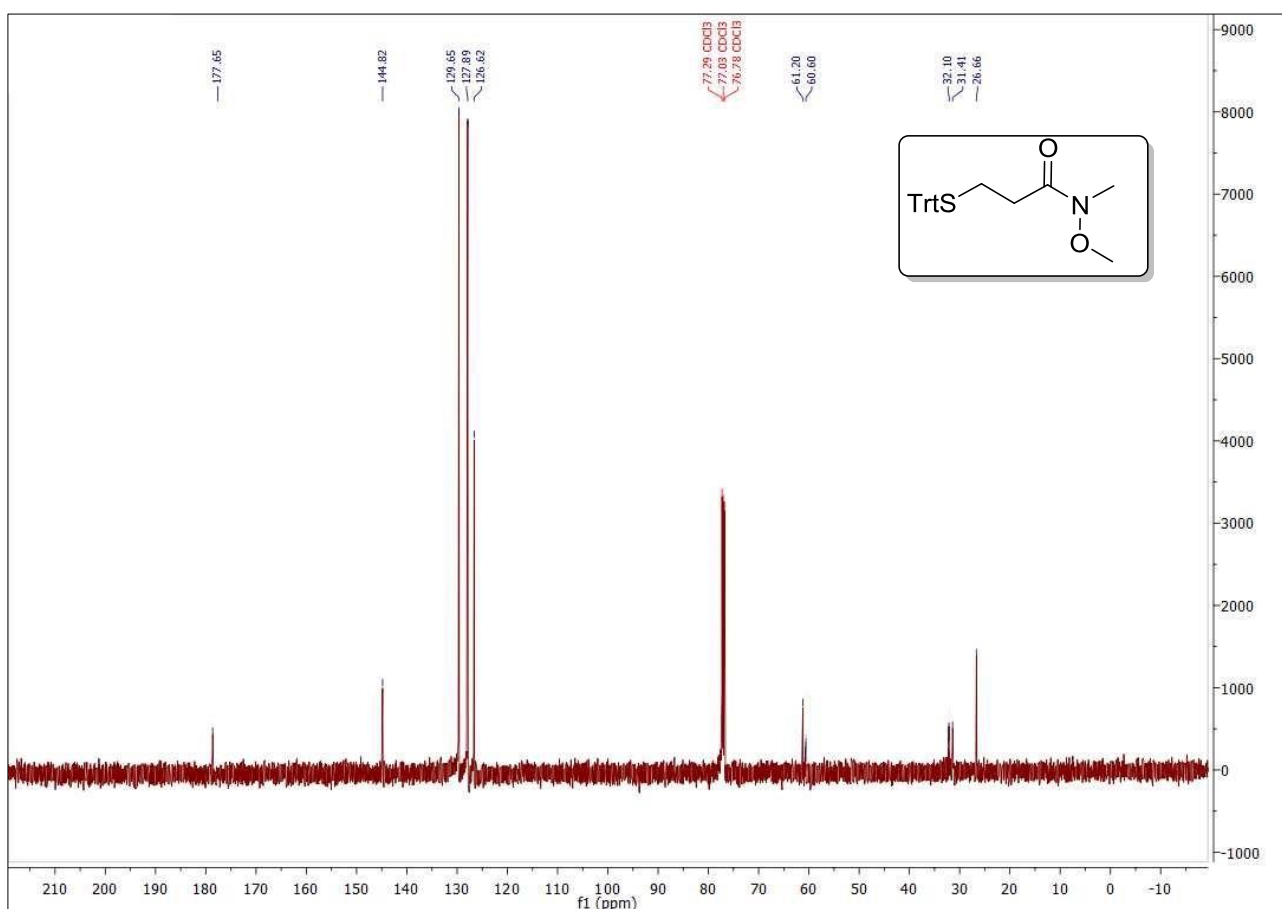

<sup>13</sup>C NMR of N-methoxy-N-methyl-3-(tritylthio)propanamide

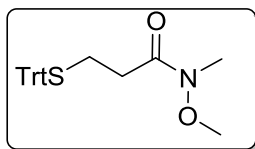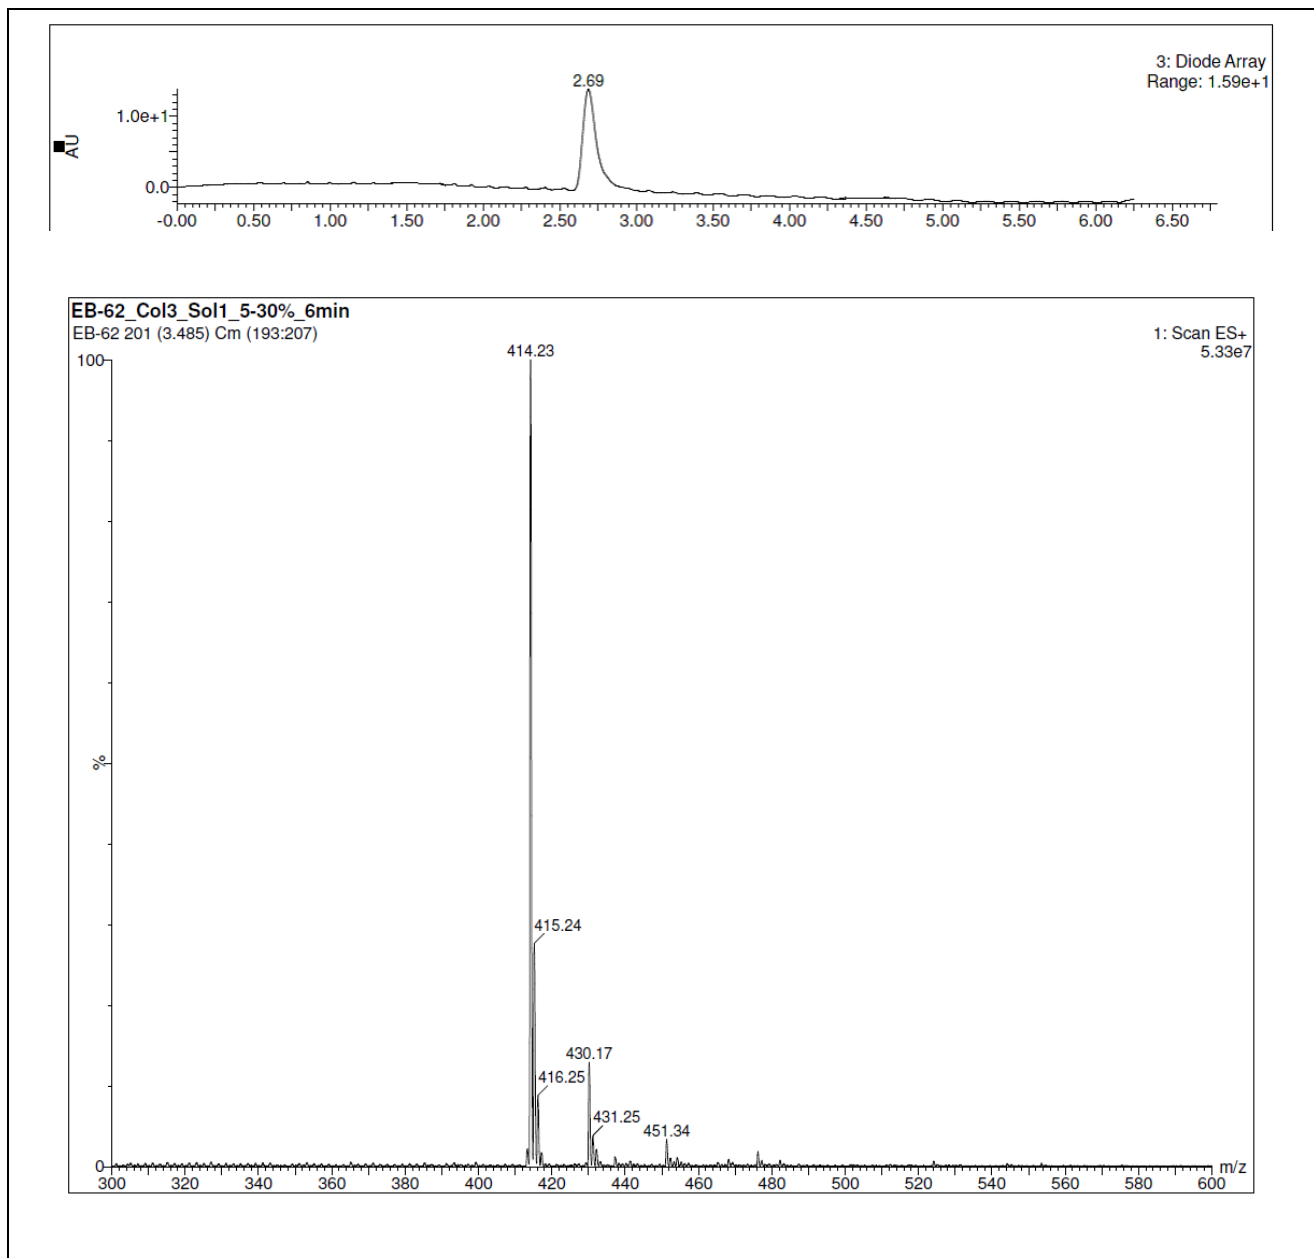

SFC-HPLC and ESI-MS of N-methoxy-N-methyl-3-(tritylthio)propanamide

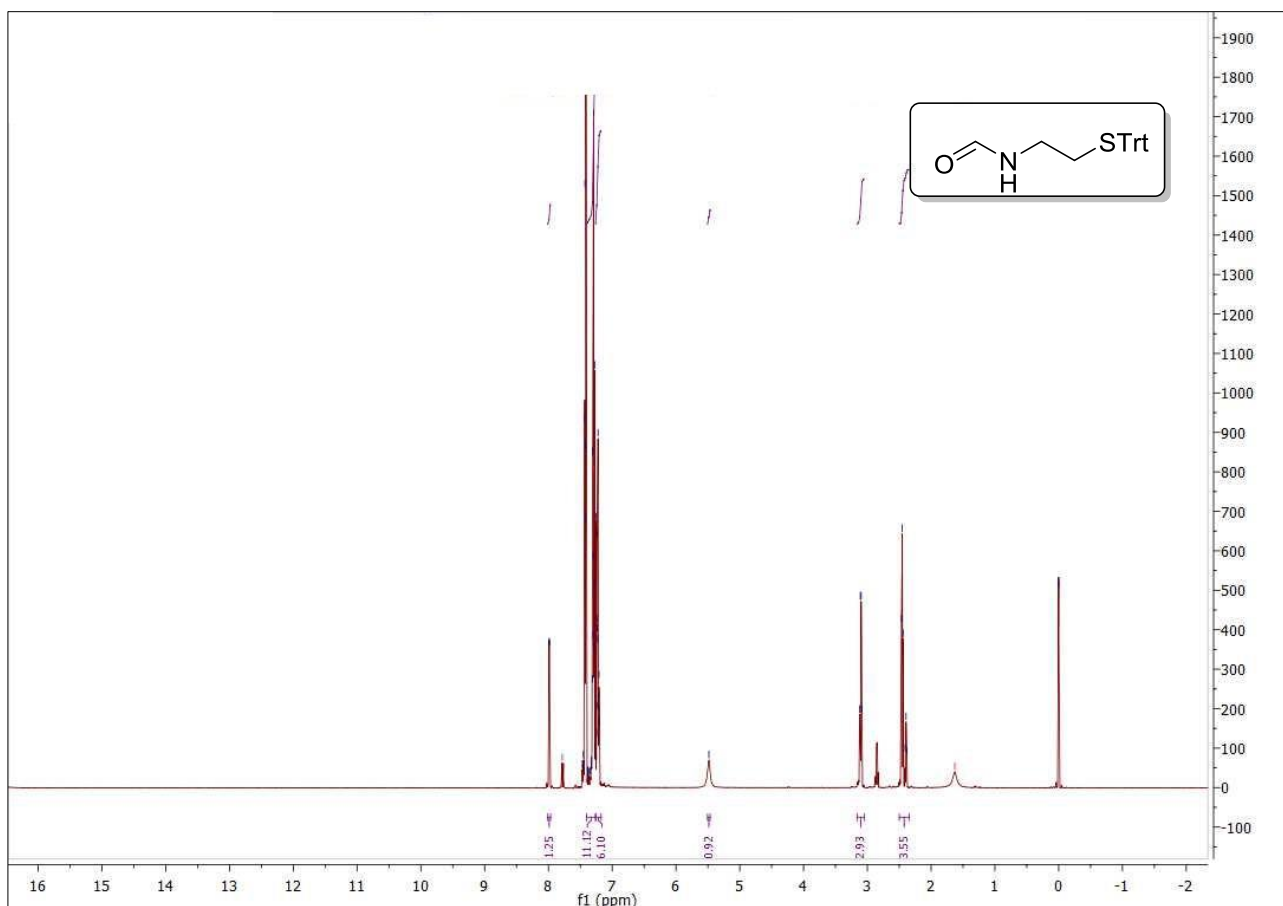

<sup>1</sup>H NMR of N-(2-(tritylthio)ethyl)formamide

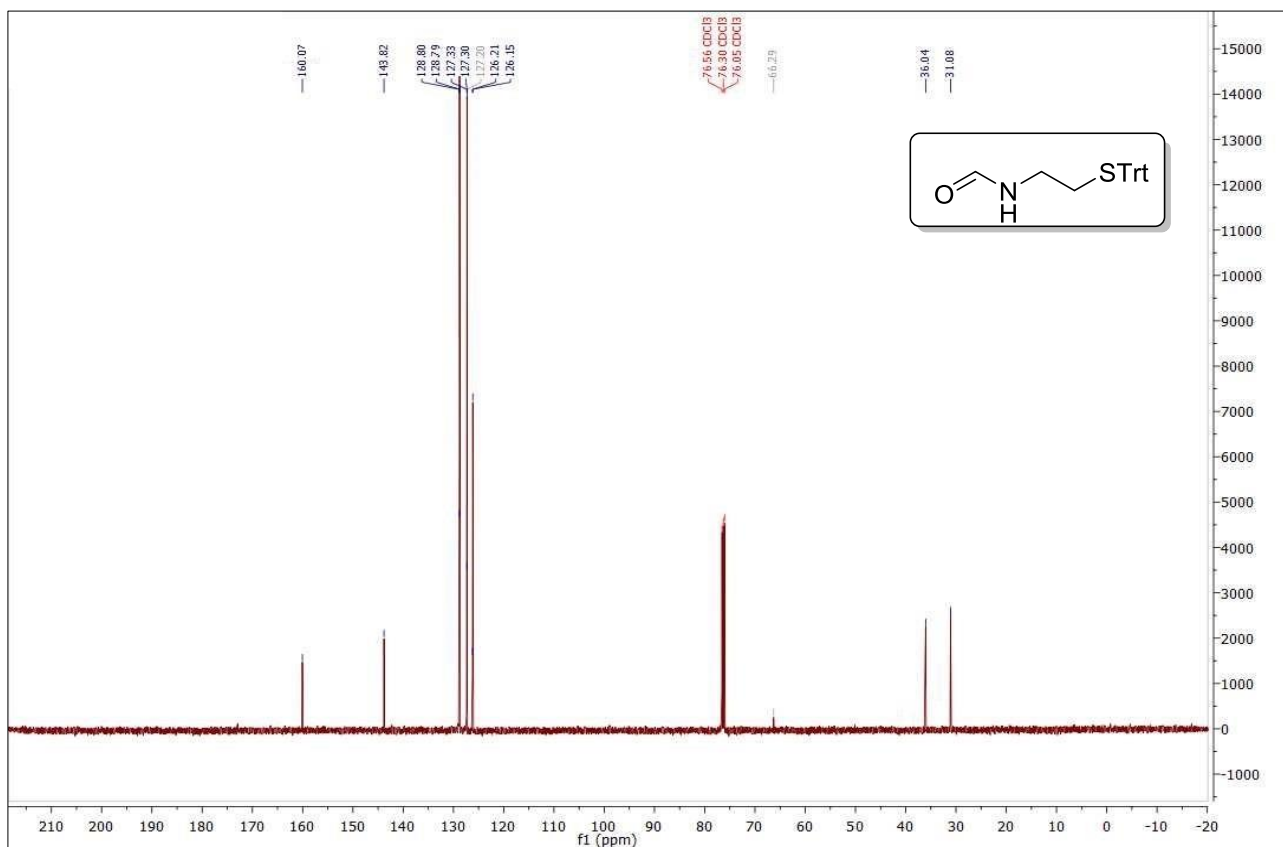

<sup>13</sup>C NMR of N-(2-(tritylthio)ethyl)formamide

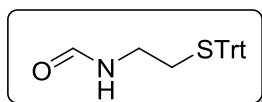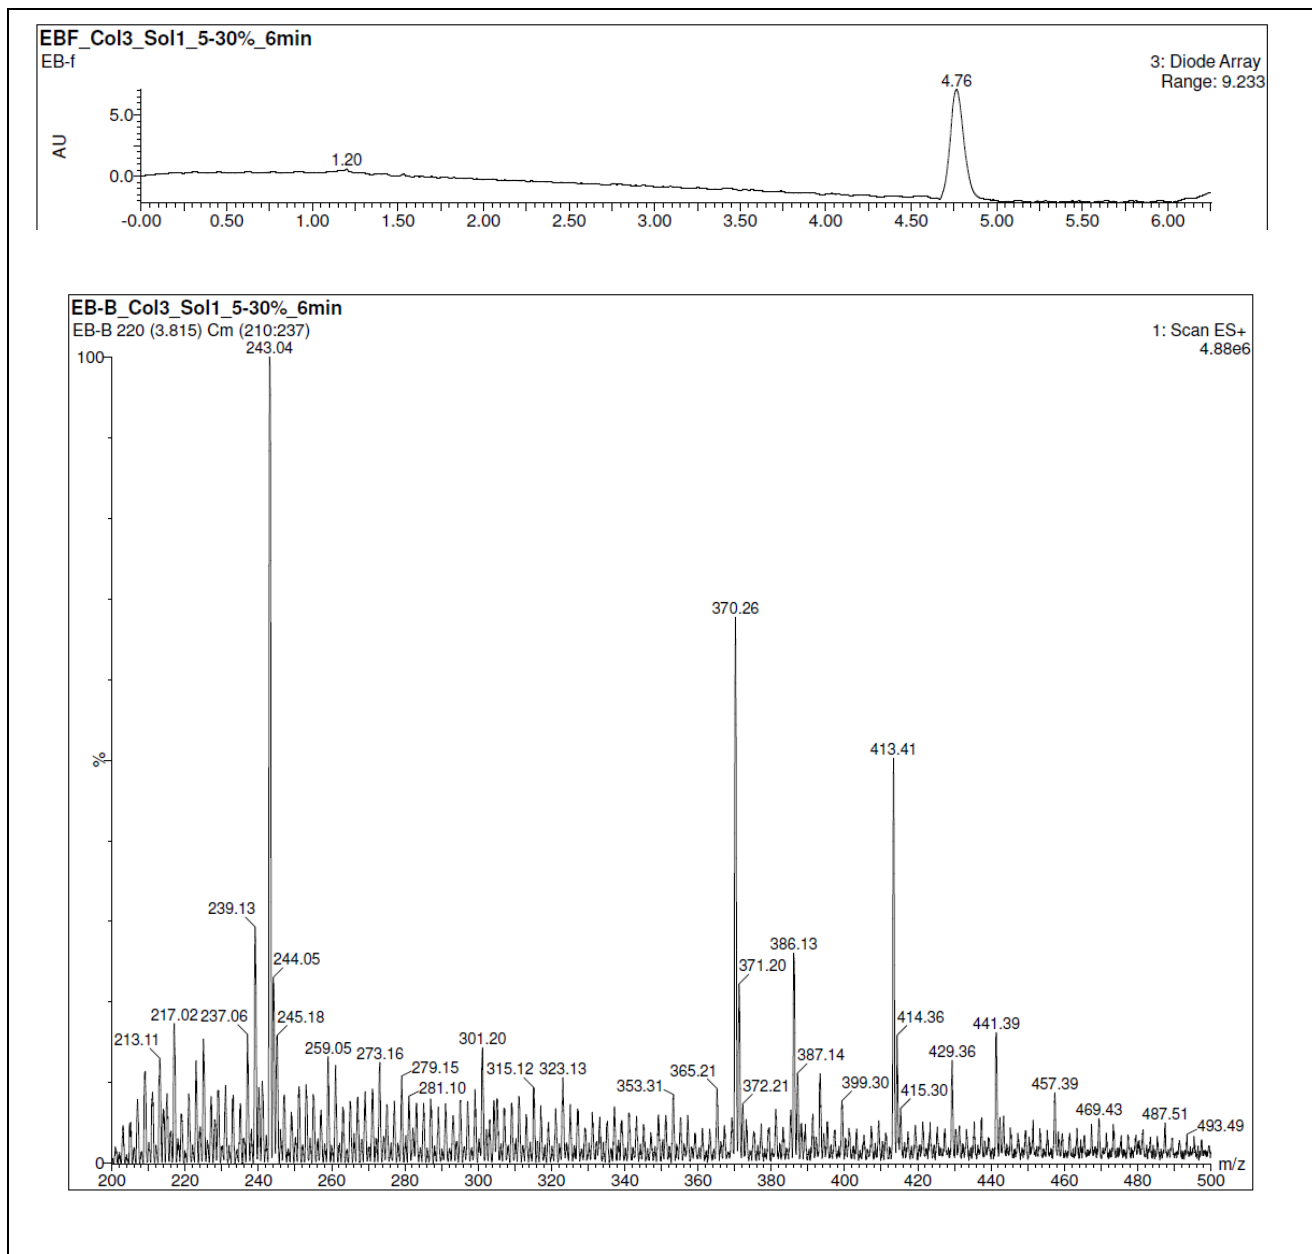

SFC-HPLC and ESI-MS of N-(2-(tritylthio)ethyl)formamide



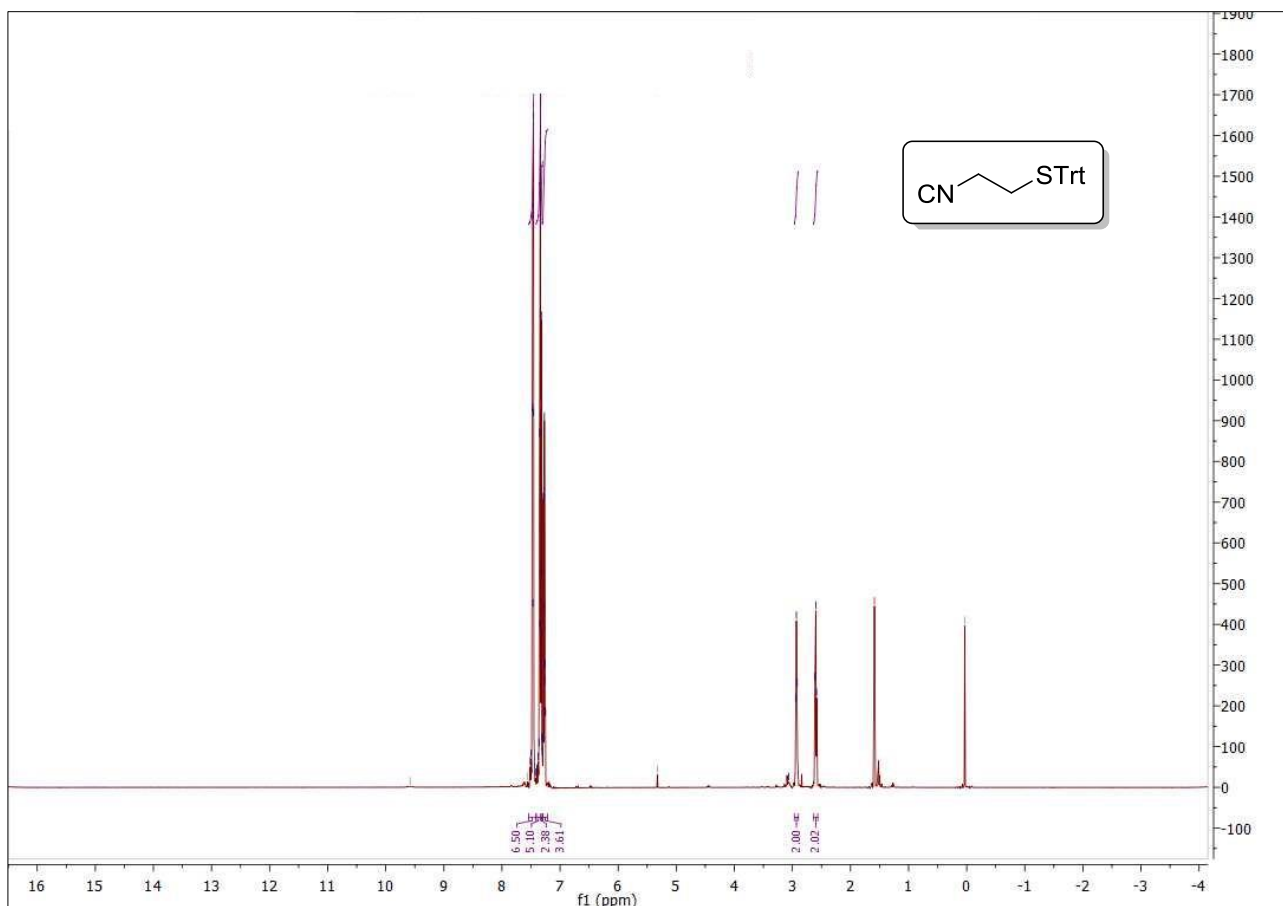

**<sup>1</sup>H NMR of (2-isocyanoethyl)(trityl)sulfane**

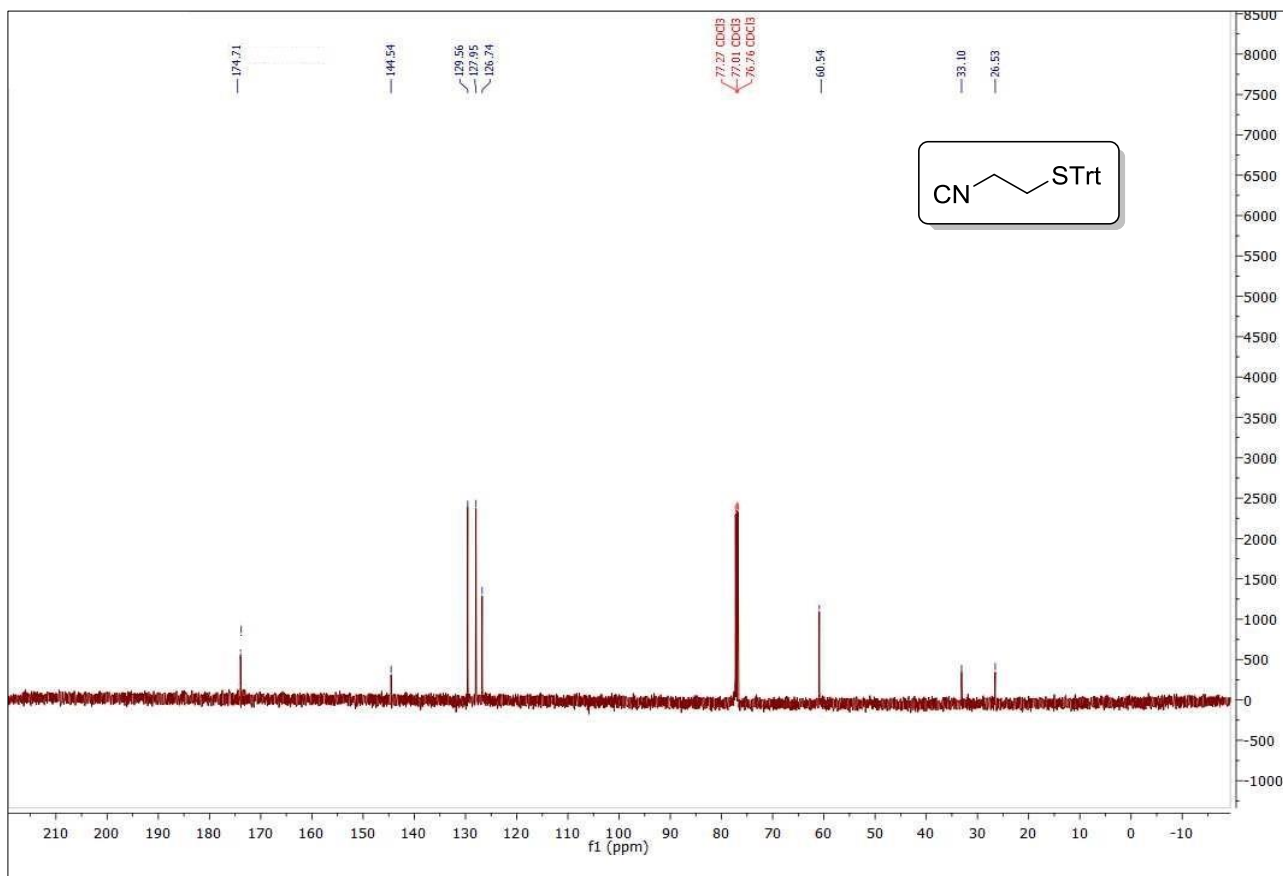

**<sup>13</sup>C NMR of (2-isocyanoethyl)(trityl)sulfane**

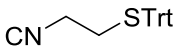

EB-C\_Col3\_Sol1\_5-30%\_6min  
EB-C

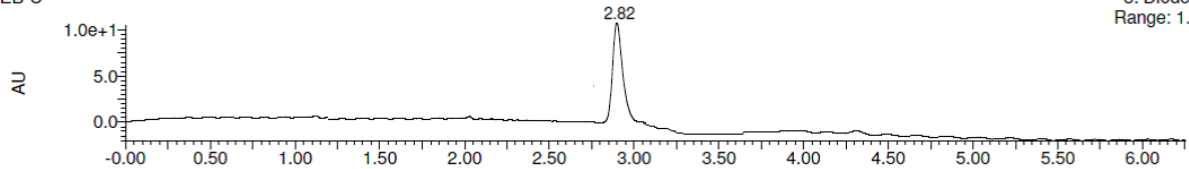

EB-C\_Col3\_Sol1\_5-30%\_6min  
EB-C 193 (3.346) Cm (186:200)

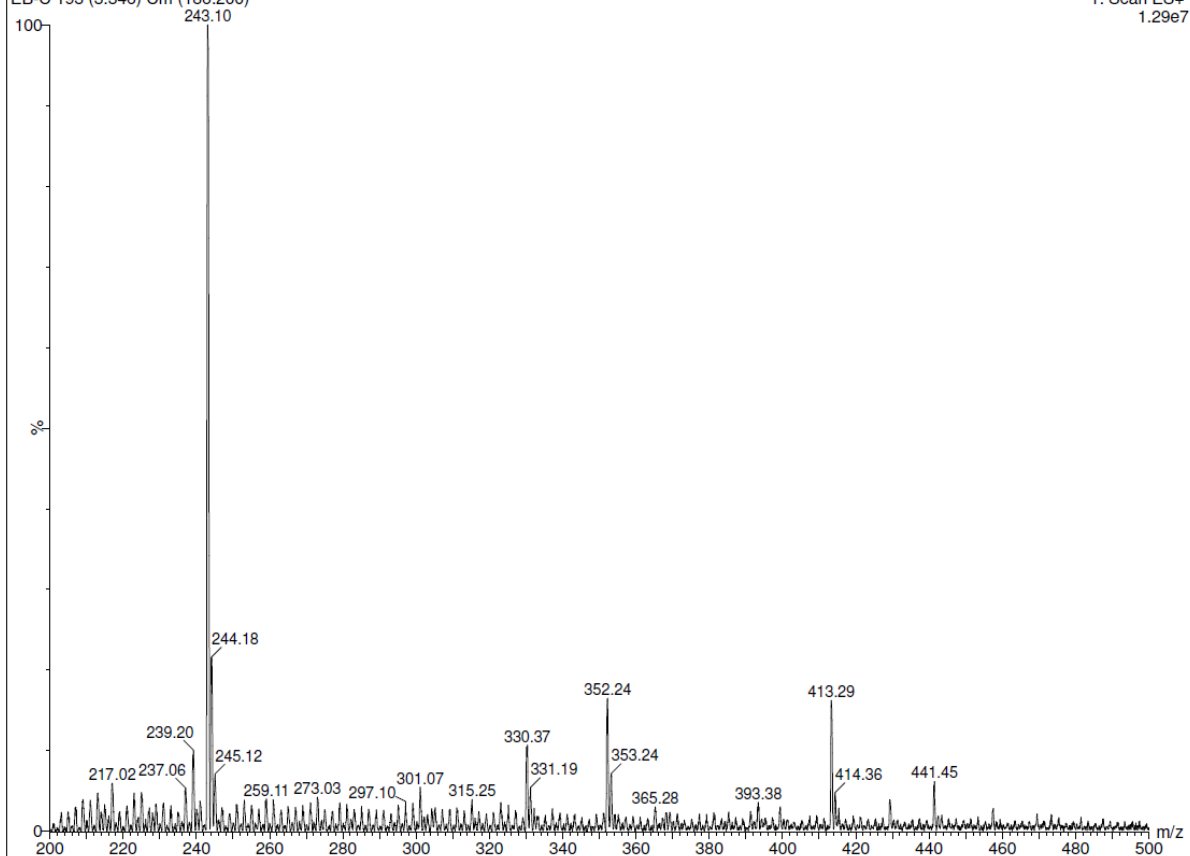

SFC-HPLC and ESI-MS of (2-isocyanoethyl)(trityl)sulfane



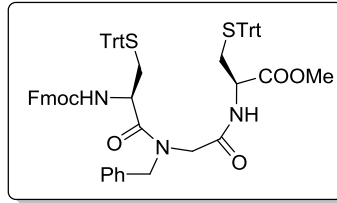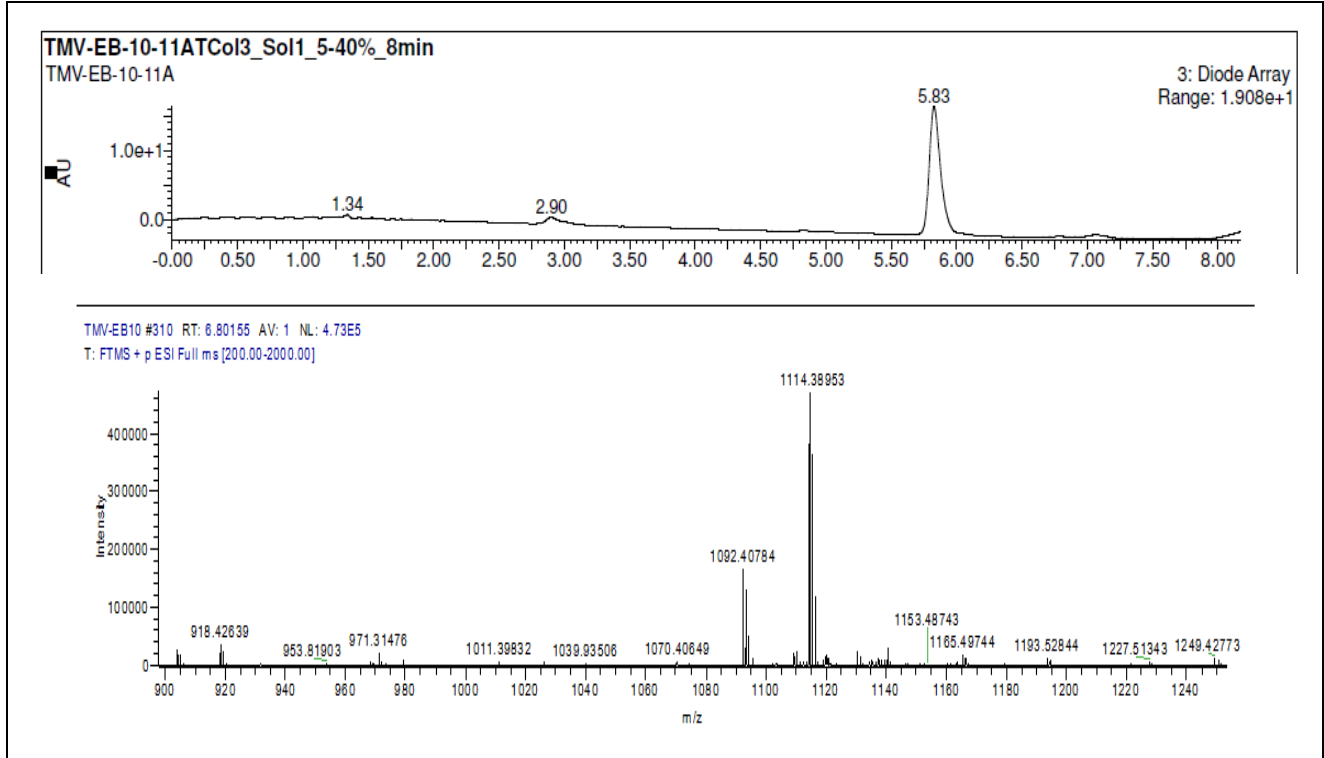

SFC-HPLC and HRMS of (5*R*,11*R*)-methyl 7-benzyl-1-(9*H*-fluoren-9-yl)-3,6,9-trioxo-5,11-bis((tritylthio)methyl)-2-oxa-4,7,10-triazadodecan-12-oate, 3a

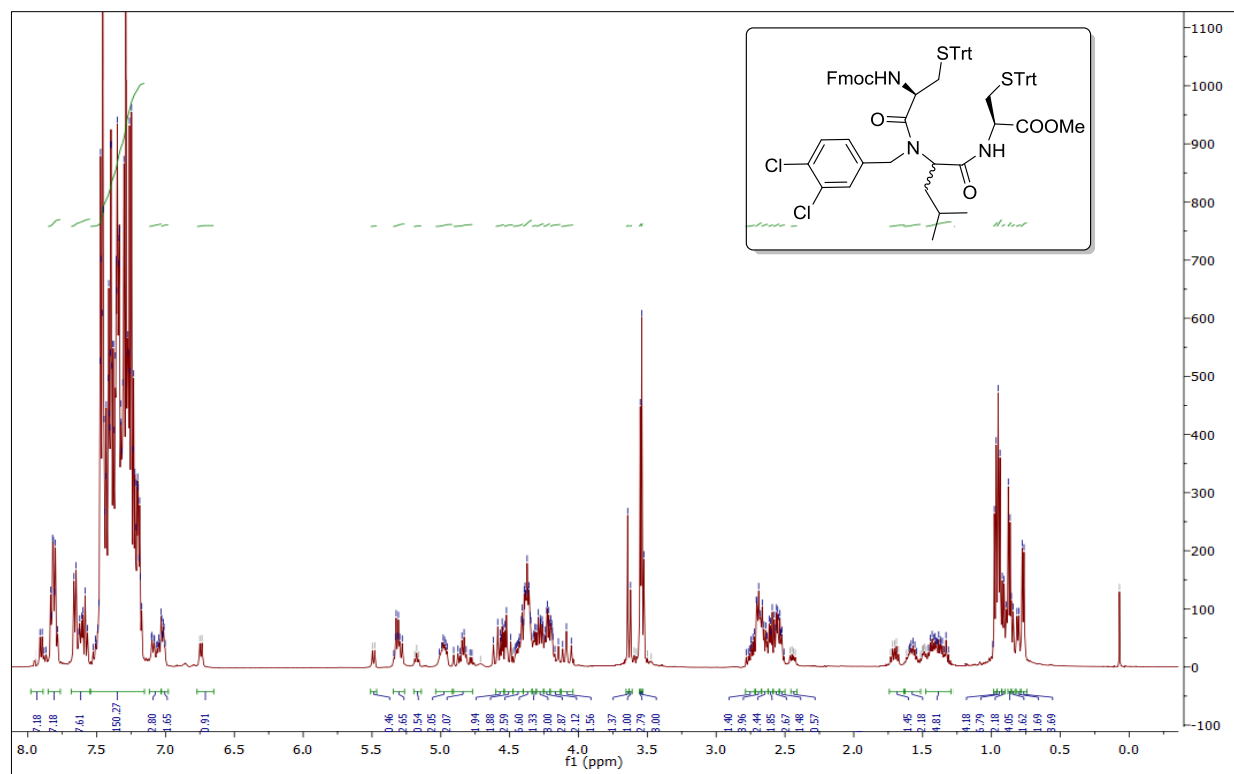

**<sup>1</sup>H NMR of (5R,11R)-methyl 7-(3,4-dichlorobenzyl)-1-(9H-fluoren-9-yl)-8-isobutyl-3,6,9-trioxo-5,11-bis((tritylthio)methyl)-2-oxa-4,7,10-triazadodecan-12-oate, 3b**

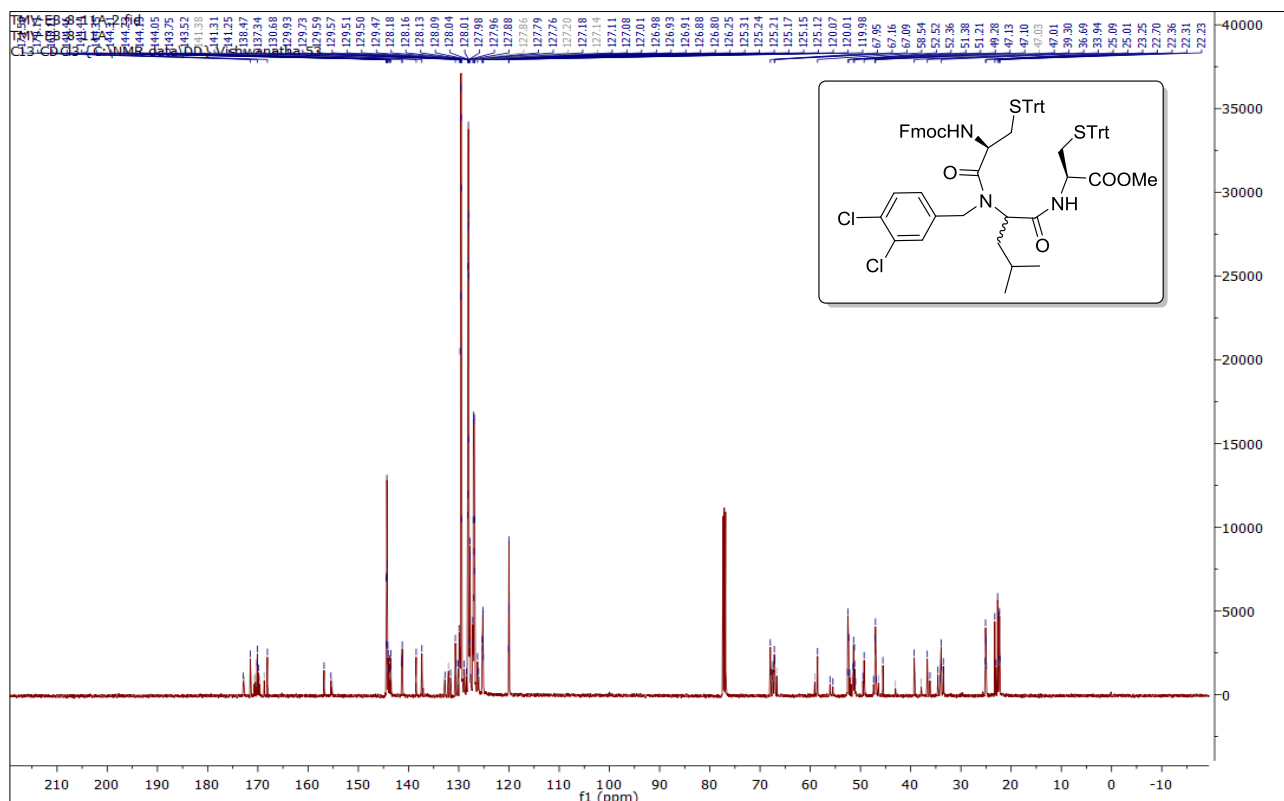

**<sup>13</sup>C NMR of (5R,11R)-methyl 7-(3,4-dichlorobenzyl)-1-(9H-fluoren-9-yl)-8-isobutyl-3,6,9-trioxo-5,11-bis((tritylthio)methyl)-2-oxa-4,7,10-triazadodecan-12-oate, 3b**

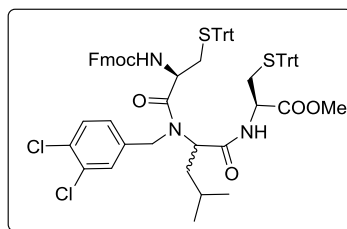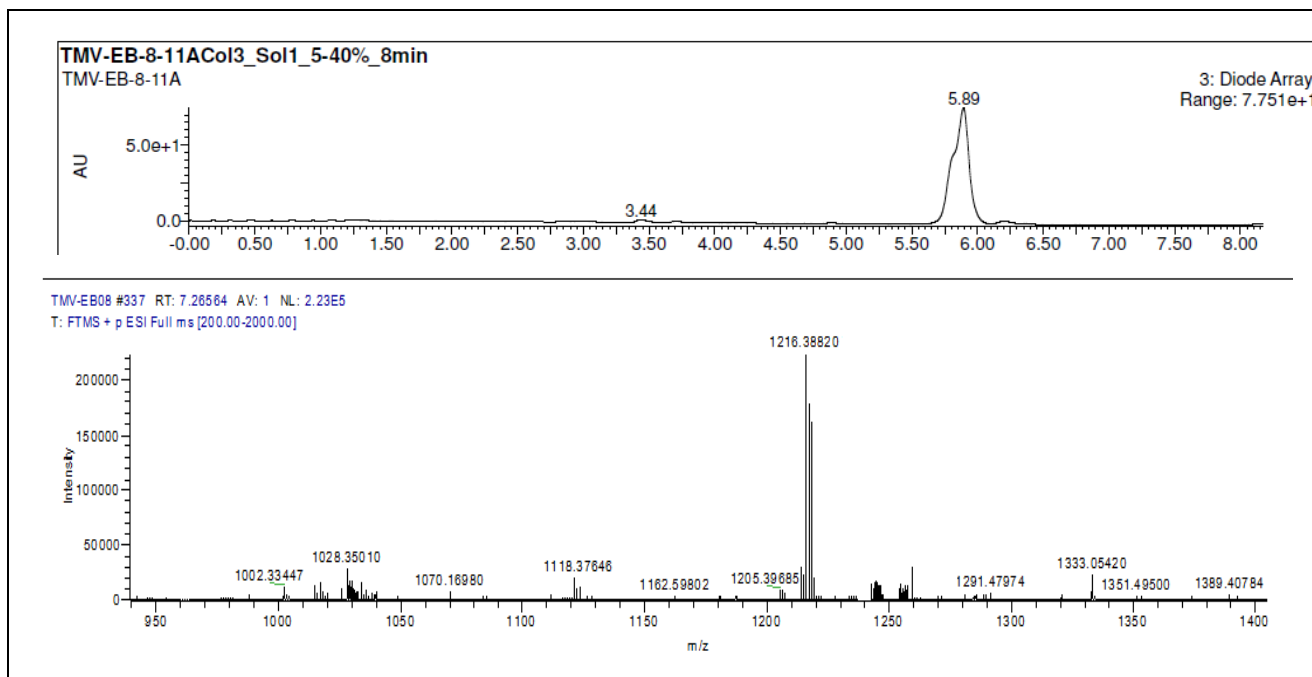

**SFC-HPLC and HRMS of (5R,11R)-methyl 7-(3,4-dichlorobenzyl)-1-(9H-fluoren-9-yl)-8-isobutyl-3,6,9-trioxo-5,11-bis((tritylthio)methyl)-2-oxa-4,7,10-triazadodecan-12-oate, 3b**



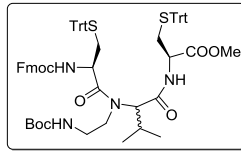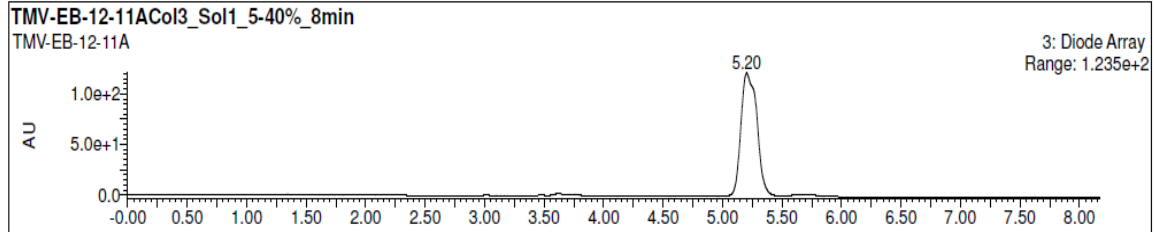

TMV-EB12 #334 RT: 6.96553 AV: 1 NL: 8.60E8  
T: FTMS + p ESI Full ms [200.00-2000.00]

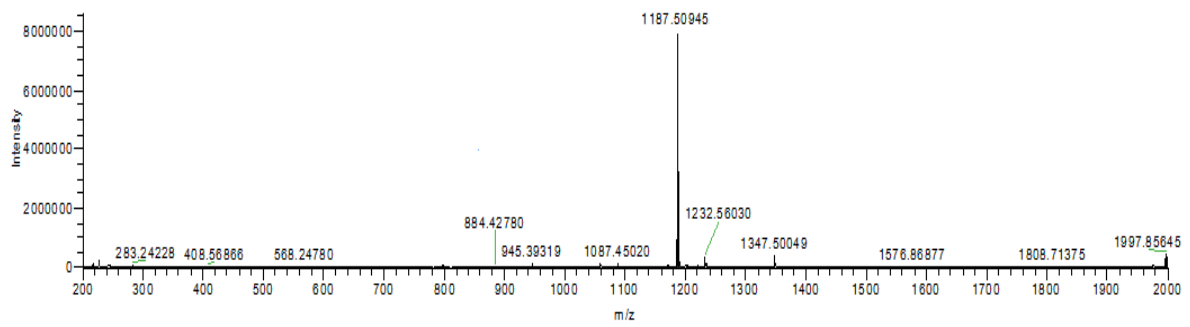

**SFC-HPLC and HRMS of of (12R)-methyl 8-((R)-2-(((9H-fluoren-9-yl)methoxy)carbonyl)amino)-3-(tritylthio)propanoyl)-9-isopropyl-2,2-dimethyl-4,10-dioxo-12-((tritylthio)methyl)-3-oxa-5,8,11-triazatridecan-13-oate, 3c**





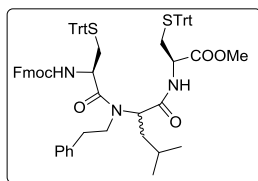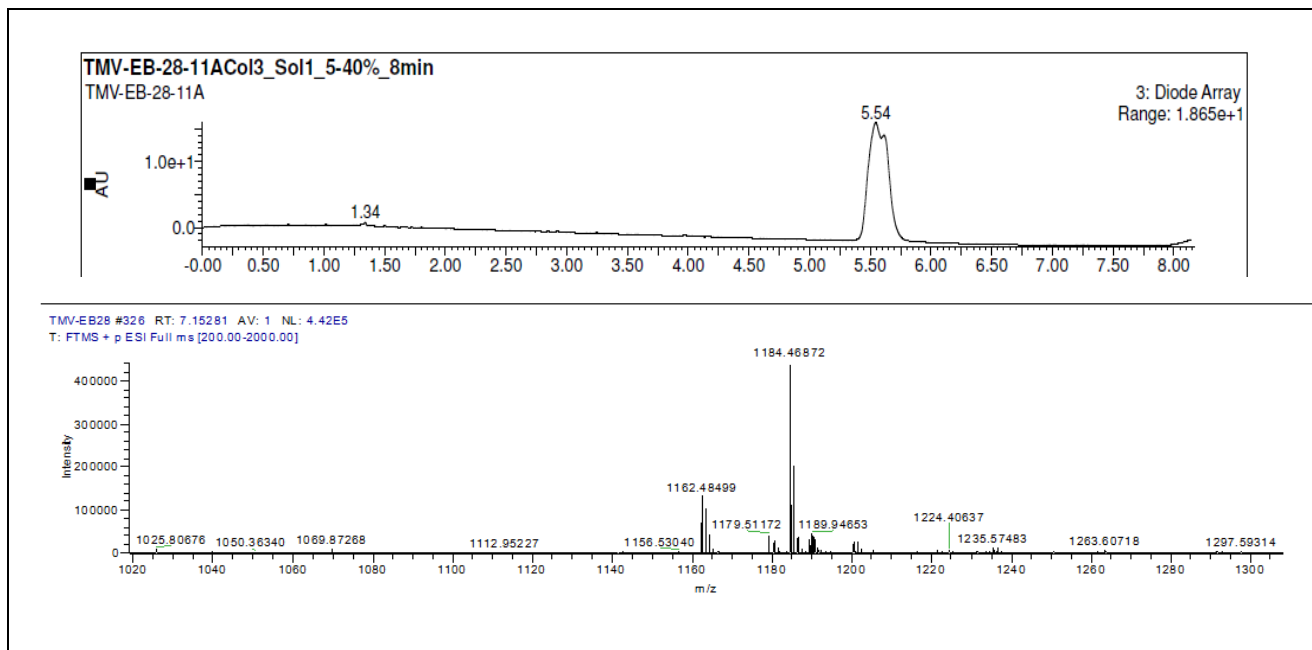

**SFC-HPLC and HRMS of (5R,11R)-methyl 1-(9H-fluoren-9-yl)-8-isobutyl-3,6,9-trioxo-7-phenethyl-5,11-bis((tritylthio)methyl)-2-oxa-4,7,10-triazadodecan-12-olate, 3d**



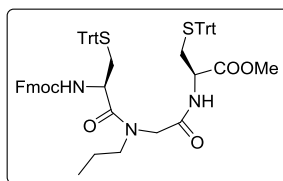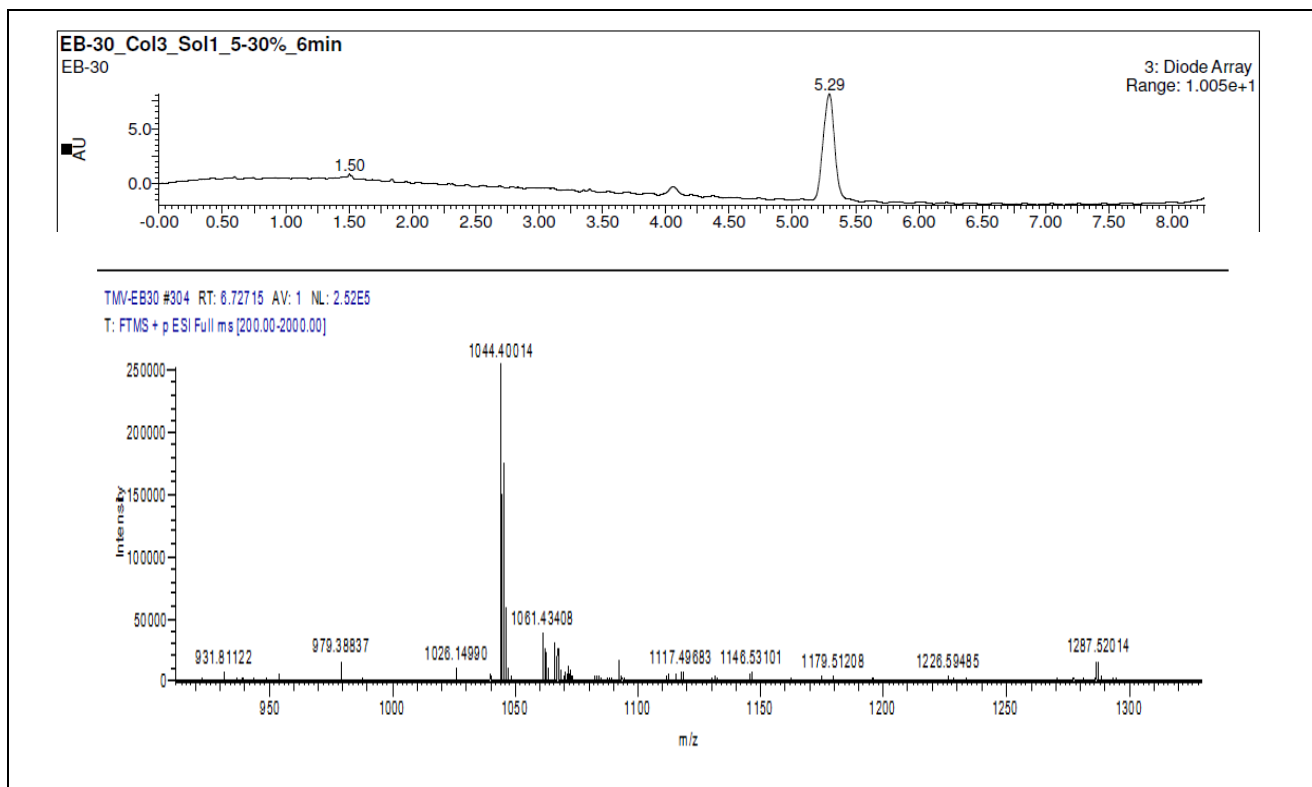

**SFC-HPLC and HRMS of (5R,11R)-methyl 1-(9H-fluoren-9-yl)-3,6,9-trioxo-7-propyl-5,11-bis((tritylthio)methyl)-2-oxa-4,7,10-triazadodecan-12-oate, 3e**

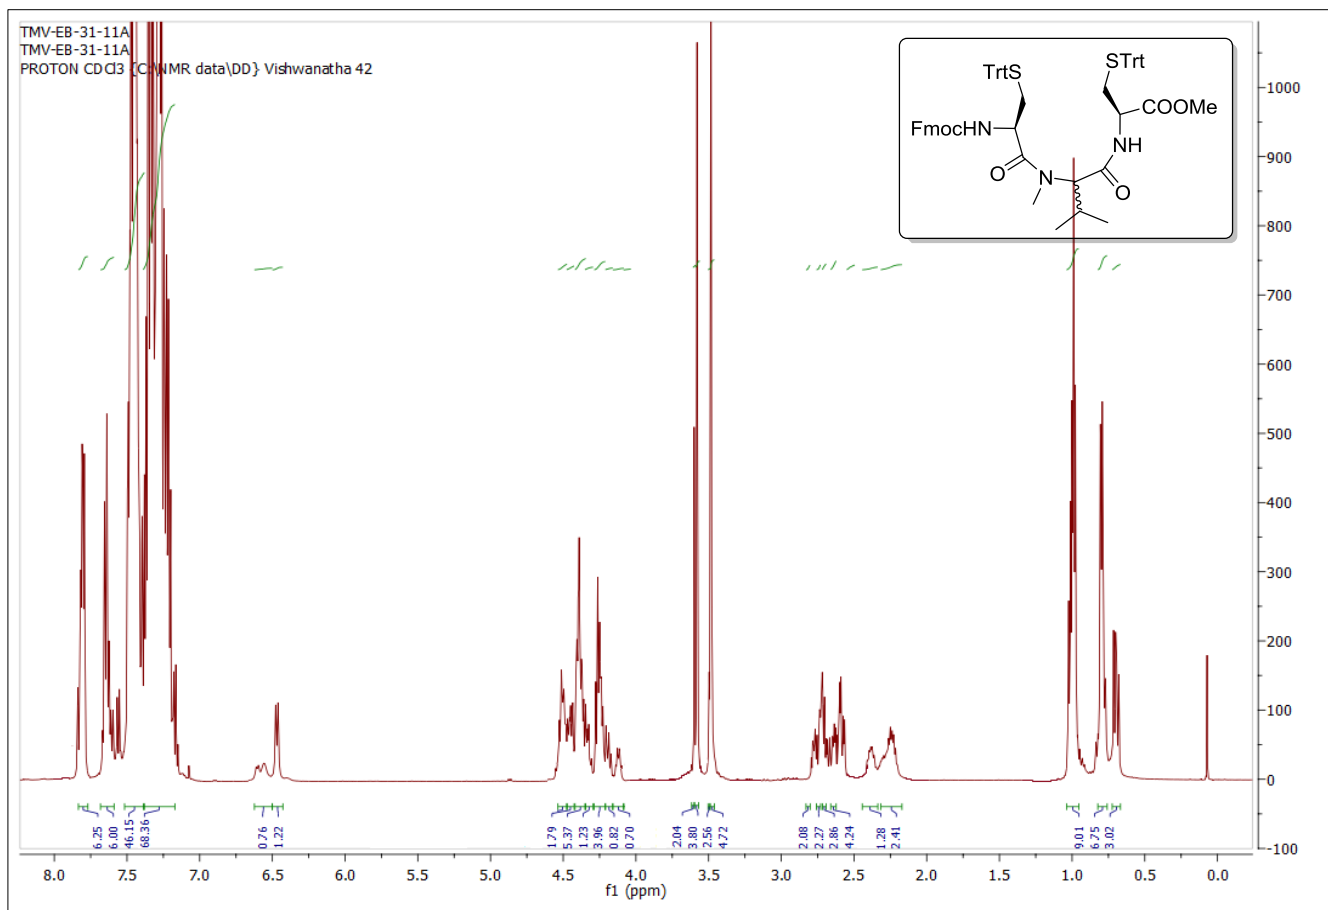

**<sup>1</sup>H NMR of (5R,11R)-methyl 1-(9H-fluoren-9-yl)-8-isopropyl-7-methyl-3,6,9-trioxo-5,11-bis((tritylthio)methyl)-2-oxa-4,7,10-triazadodecan-12-oate, 3f**

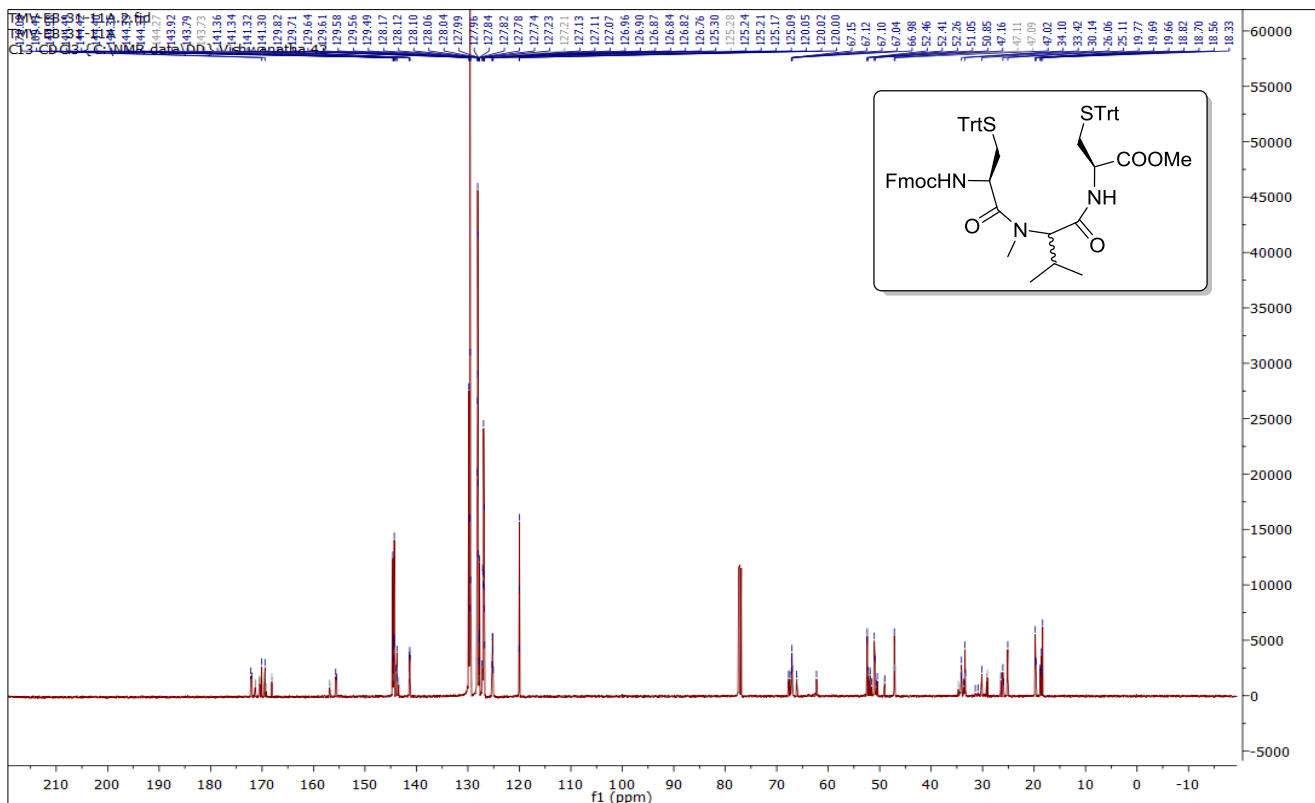

**<sup>13</sup>C NMR of (5R,11R)-methyl 1-(9H-fluoren-9-yl)-8-isopropyl-7-methyl-3,6,9-trioxo-5,11-bis((tritylthio)methyl)-2-oxa-4,7,10-triazadodecan-12-oate, 3f**

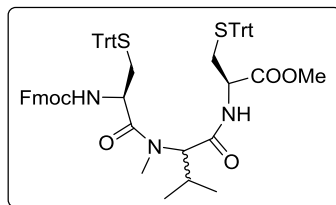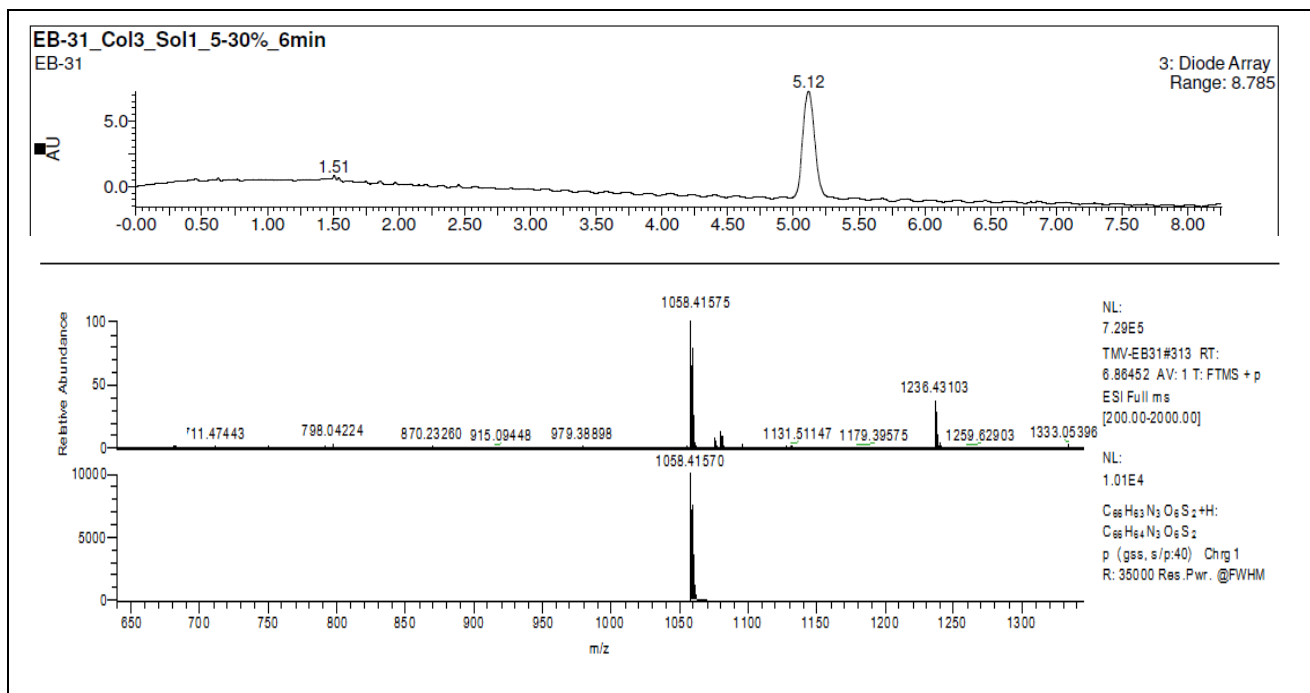

SFC-HPLC and HRMS of (5R,11R)-methyl 1-(9H-fluoren-9-yl)-8-isopropyl-7-methyl-3,6,9-trioxo-5,11-bis((tritylthio)methyl)-2-oxa-4,7,10-triazadodecan-12-oate, 3f

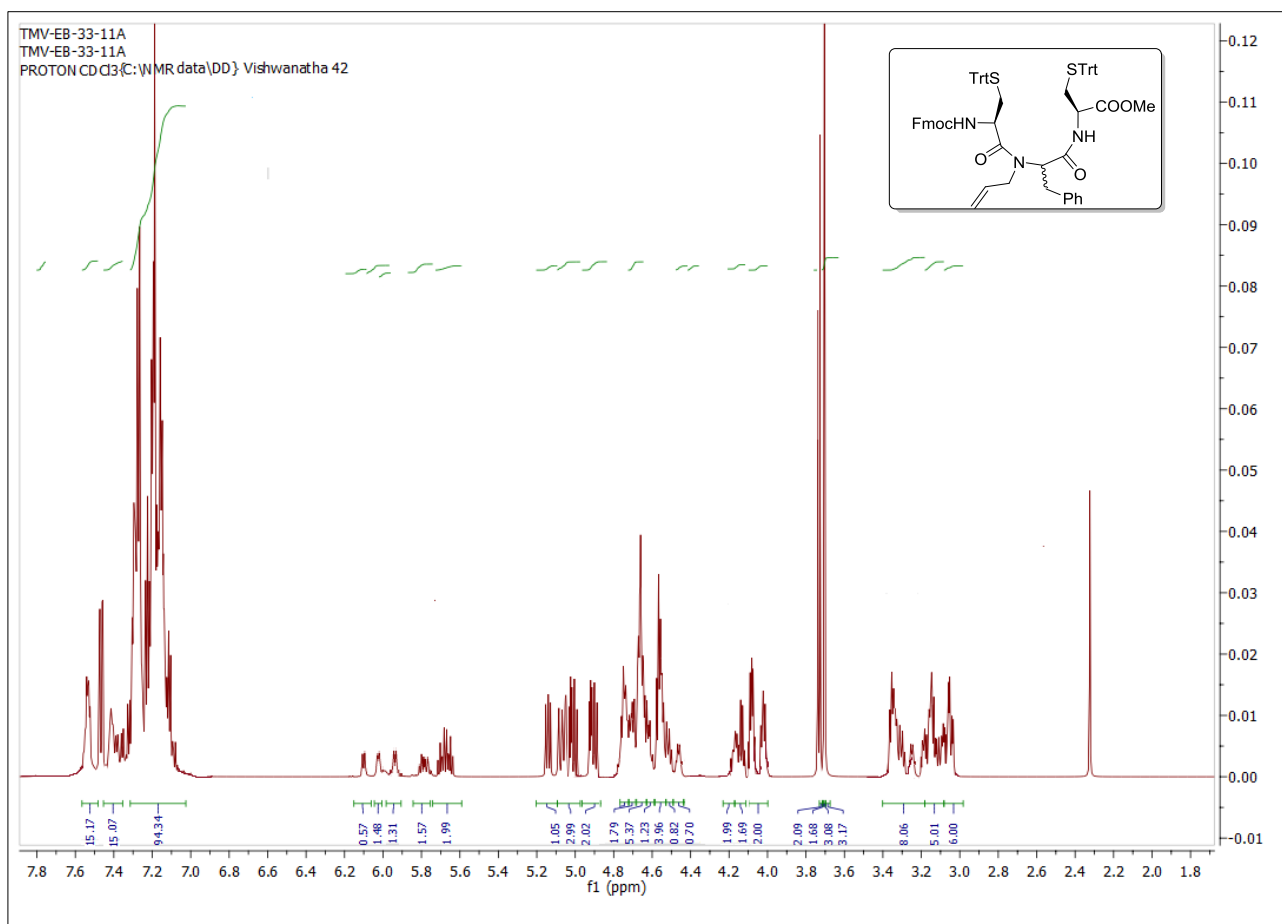

<sup>1</sup>H NMR of (5R,11R)-methyl 7-allyl-8-benzyl-1-(9H-fluoren-9-yl)-3,6,9-trioxo-5,11-bis((tritylthio)methyl)-2-oxa-4,7,10-triazadodecan-12-oate, 3g

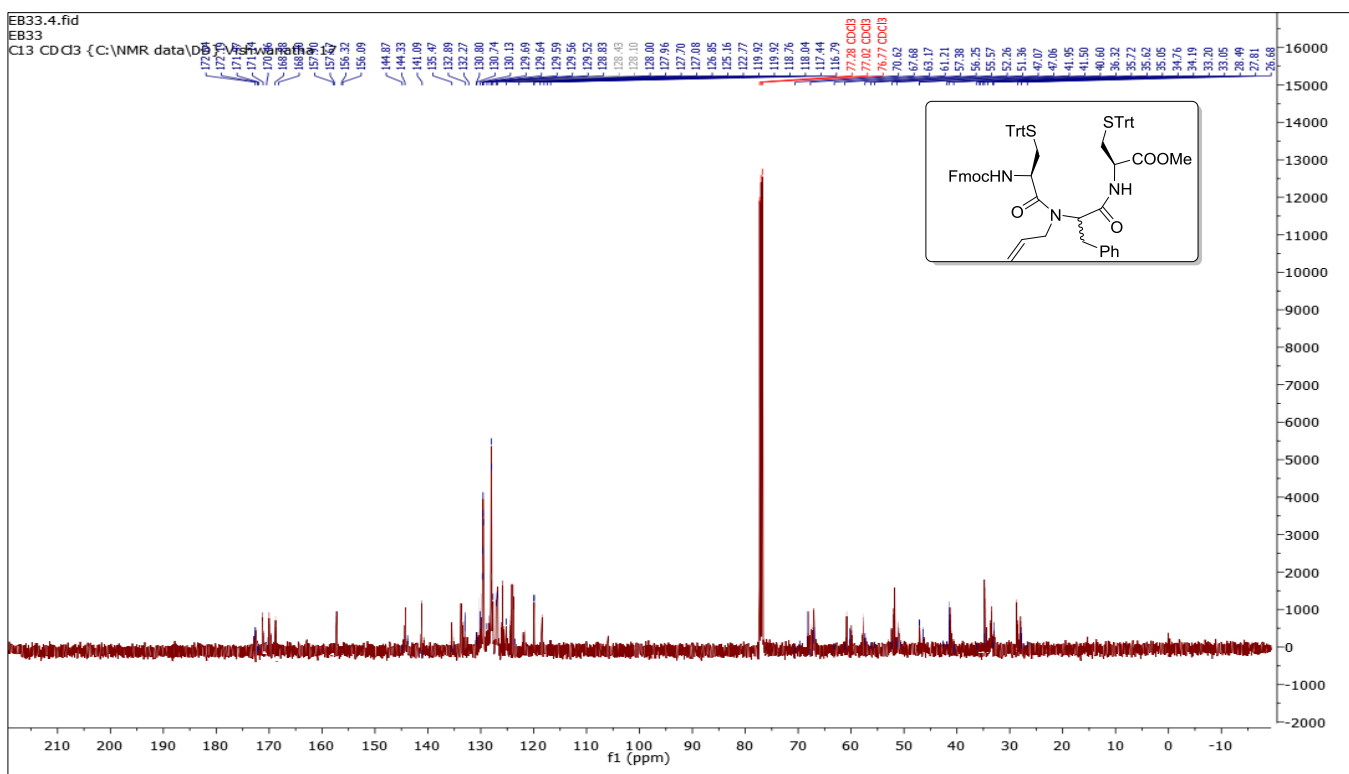

<sup>13</sup>C NMR of (5R,11R)-methyl 7-allyl-8-benzyl-1-(9H-fluoren-9-yl)-3,6,9-trioxo-5,11-bis((tritylthio)methyl)-2-oxa-4,7,10-triazadodecan-12-oate, 3g

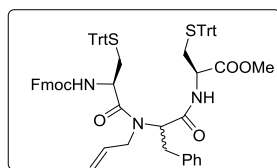

Col3\_Sol1\_5-30%\_6min

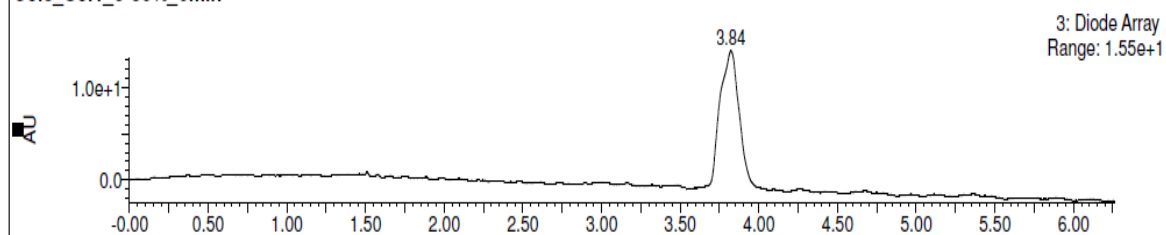

TMV-EB33 #304 RT: 6.72715 AV: 1 NL: 2.52E5  
T: FTMS + p ESI Full ms [200.00-2000.00]

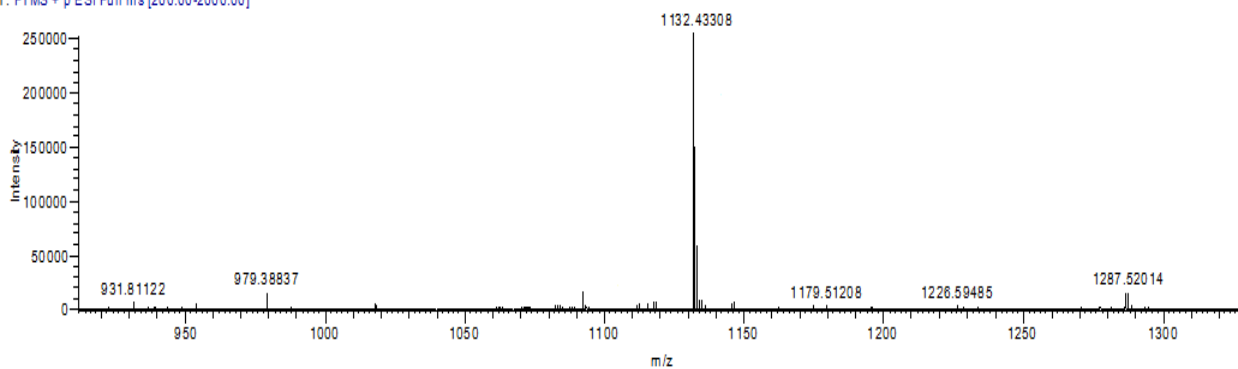

**SFC-HPLC and HRMS of (5R,11R)-methyl 7-allyl-8-benzyl-1-(9H-fluoren-9-yl)-3,6,9-trioxo-5,11-bis((tritylthio)methyl)-2-oxa-4,7,10-triazadodecan-12-oate, 3g**



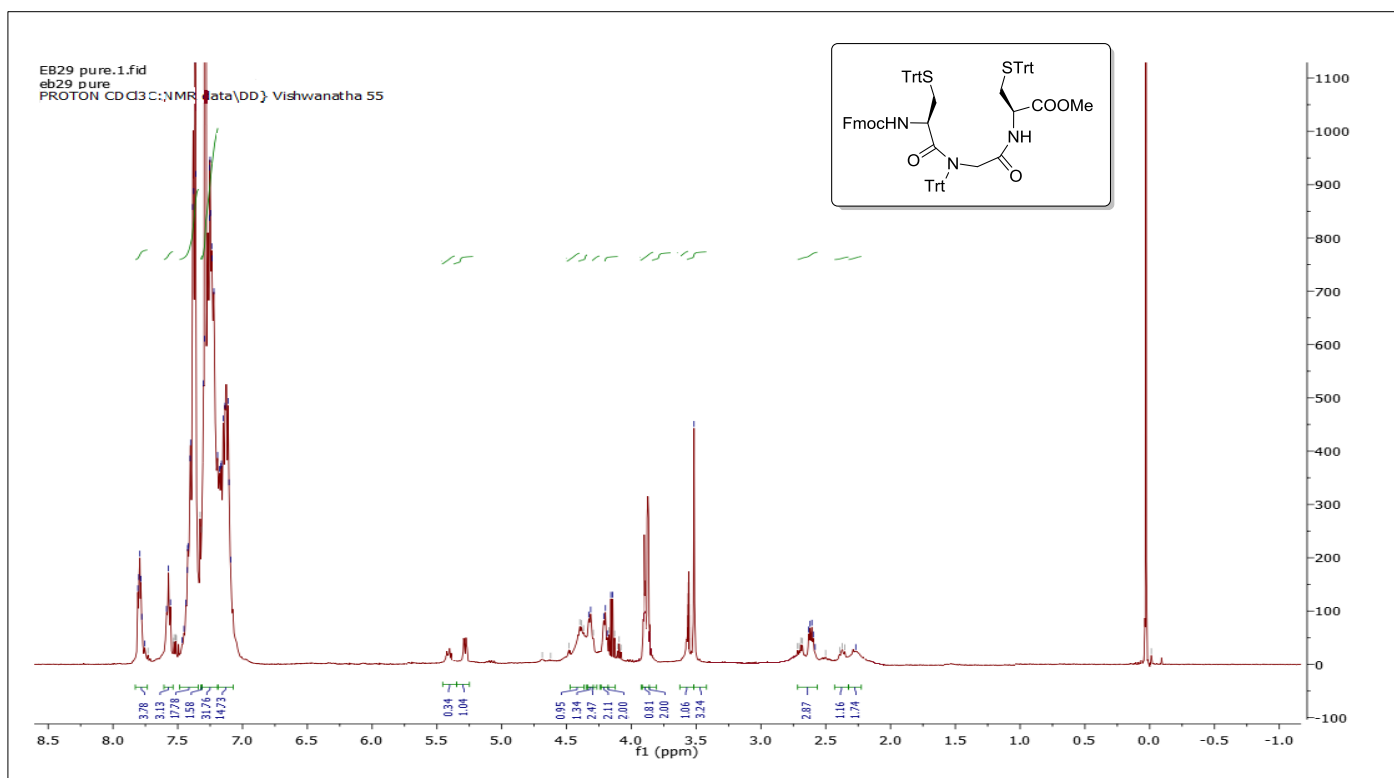

<sup>1</sup>H NMR of (5R,11R)-methyl 1-(9H-fluoren-9-yl)-3,6,9-trioxo-7-trityl-5,11-bis((tritylthio)methyl)-2-oxa-4,7,10-triazadodecan-12-oate, 3h

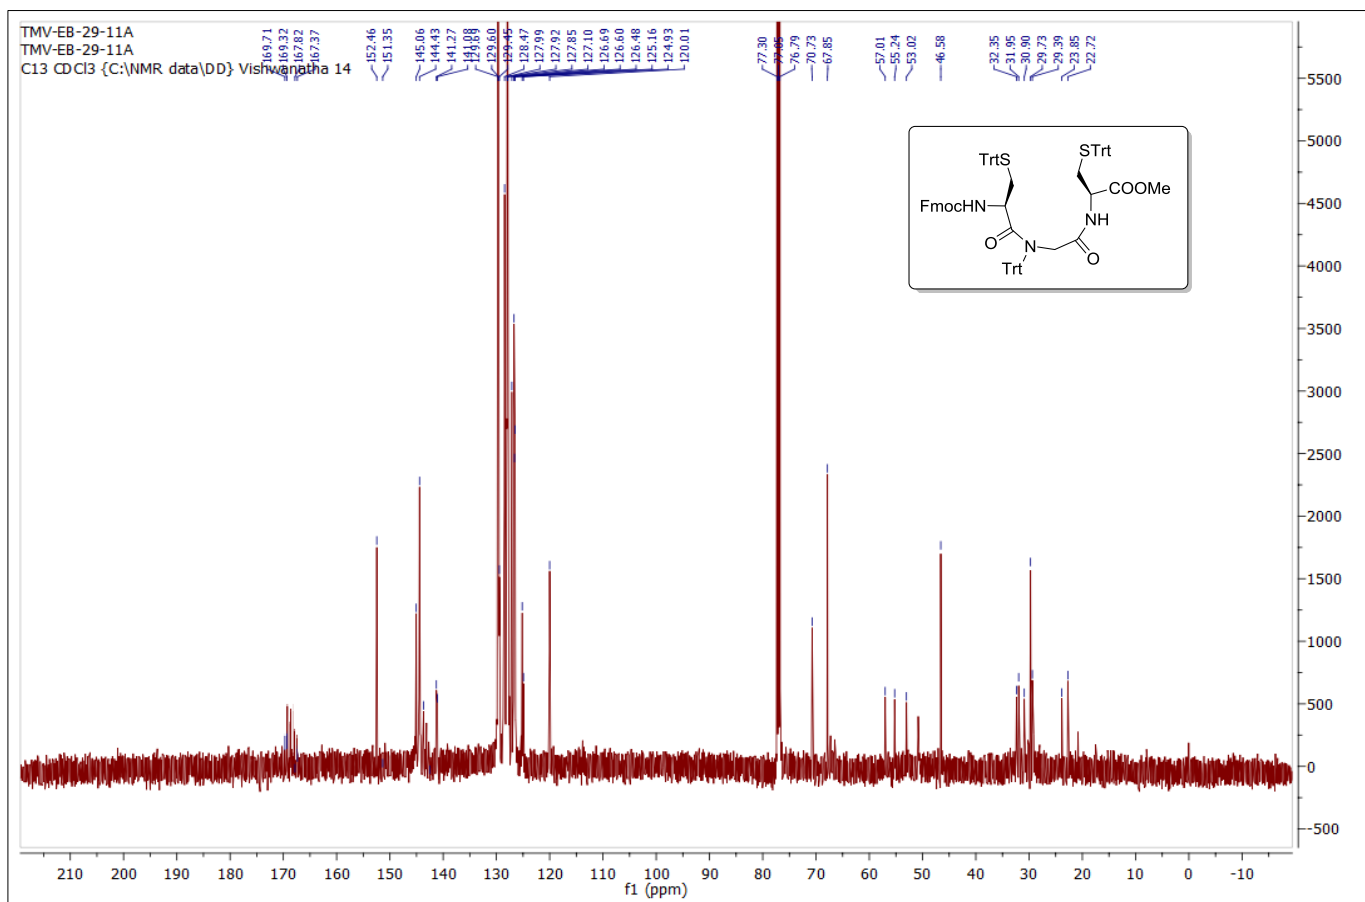

<sup>13</sup>C NMR of (5R,11R)-methyl 1-(9H-fluoren-9-yl)-3,6,9-trioxo-7-trityl-5,11-bis((tritylthio)methyl)-2-oxa-4,7,10-triazadodecan-12-oate, 3h

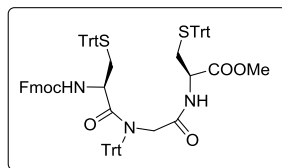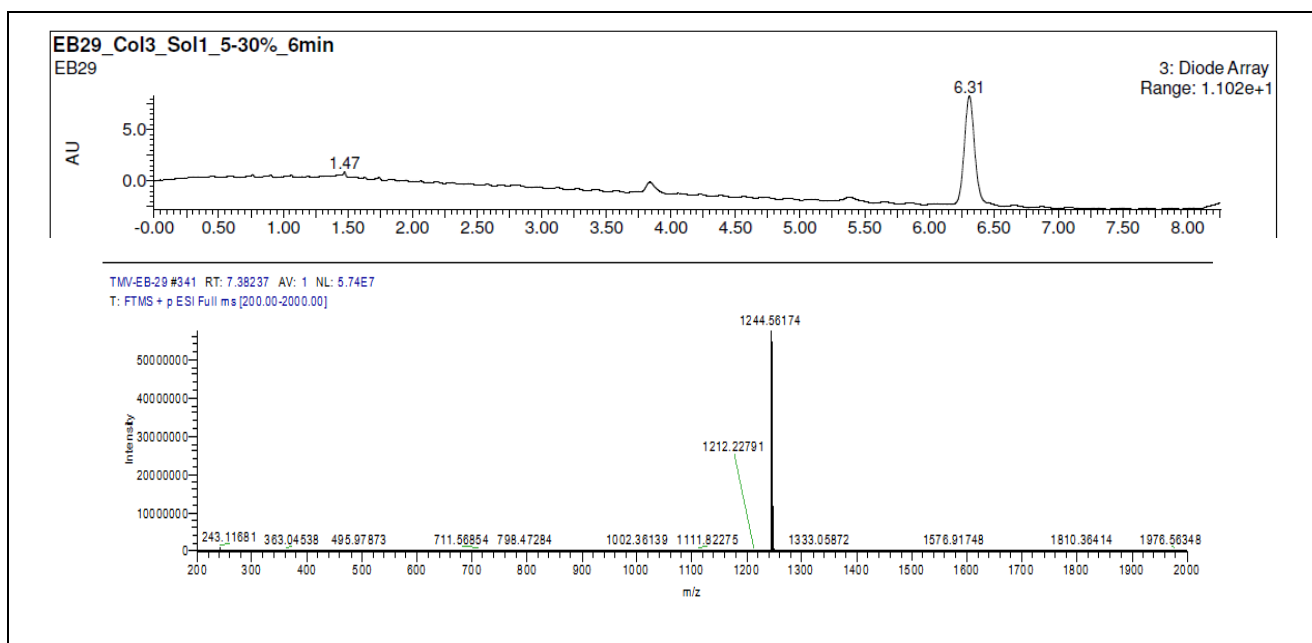

SFC-HPLC and HRMS of  $^1\text{H}$  NMR of (5R,11R)-methyl 1-(9H-fluoren-9-yl)-3,6,9-trioxo-7-trityl-5,11-bis((tritylthio)methyl)-2-oxa-4,7,10-triazadodecan-12-oate, **3h**



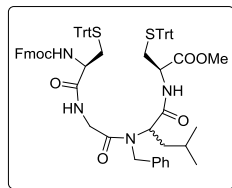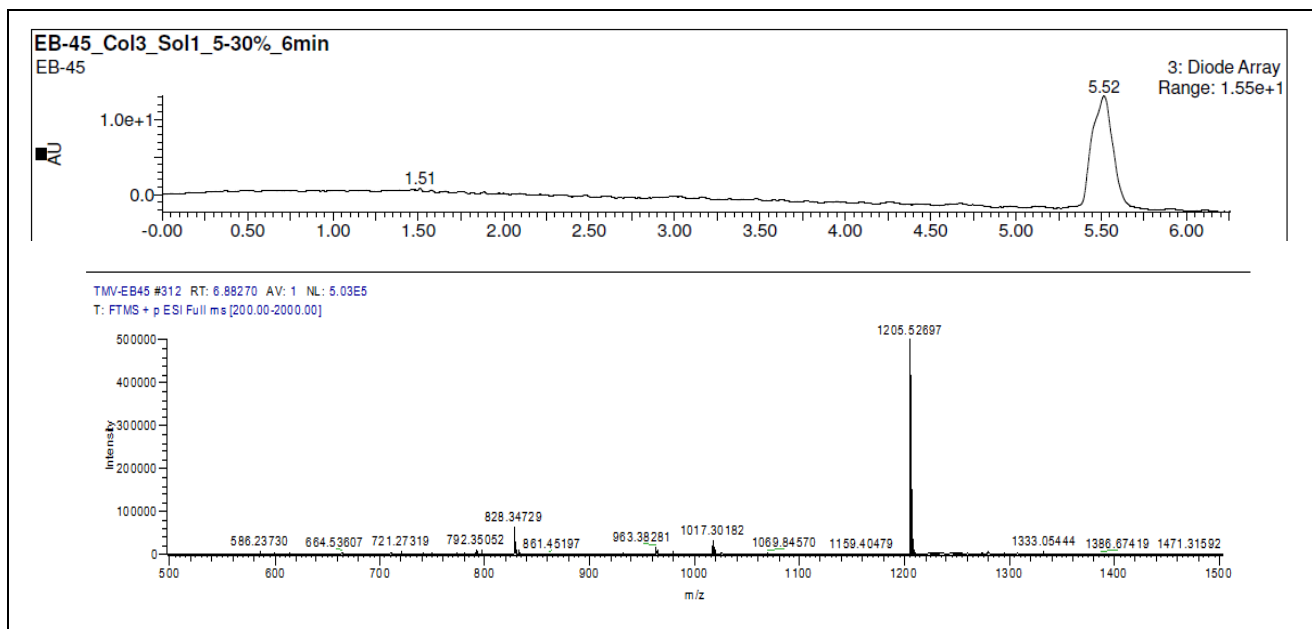

**SFC-HPLC and HRMS of (5R,14R)-methyl 10-benzyl-1-(9H-fluoren-9-yl)-11-isobutyl-3,6,9,12-tetraoxo-5,14-bis((tritylthio)methyl)-2-oxa-4,7,10,13-tetraazapentadecan-15-oate, 3i**



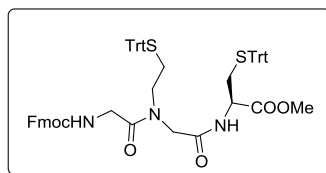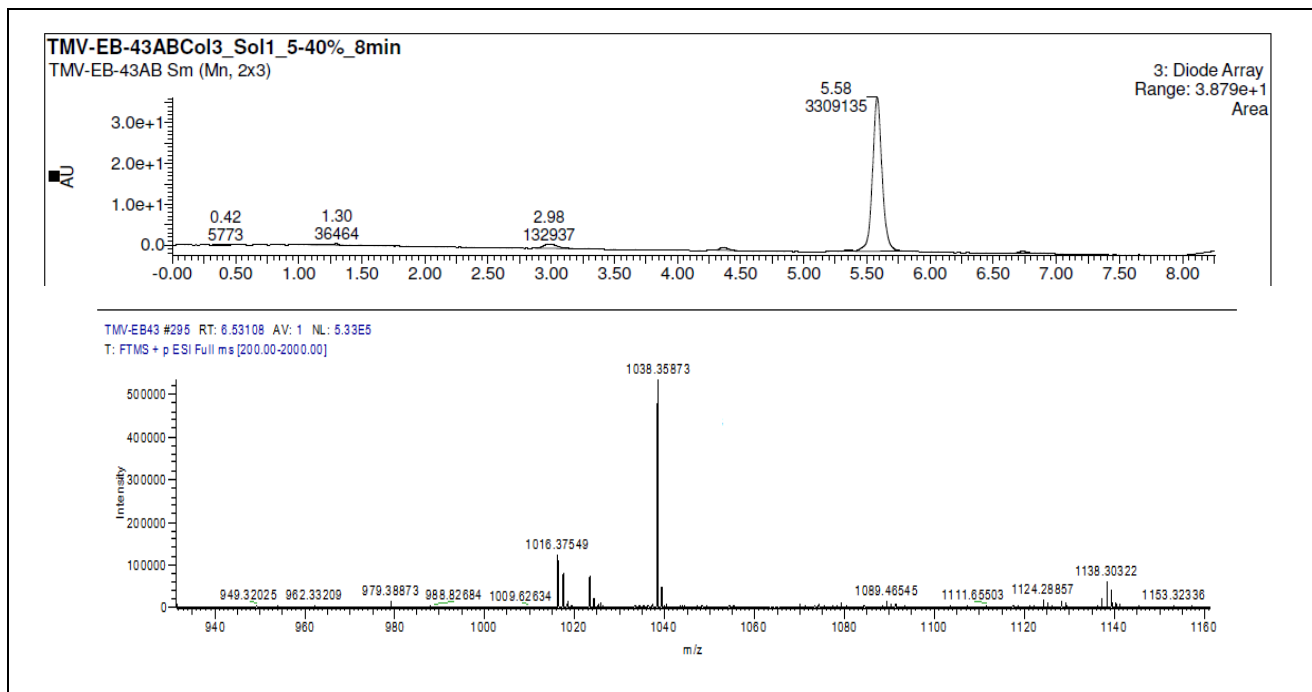

**SFC-HPLC and HRMS of (R)-methyl 1-(9H-fluoren-9-yl)-3,6,9-trioxo-7-(2-(tritylthio)ethyl)-11-((tritylthio)methyl)-2-oxa-4,7,10-triazadodecan-12-oate, 3j**

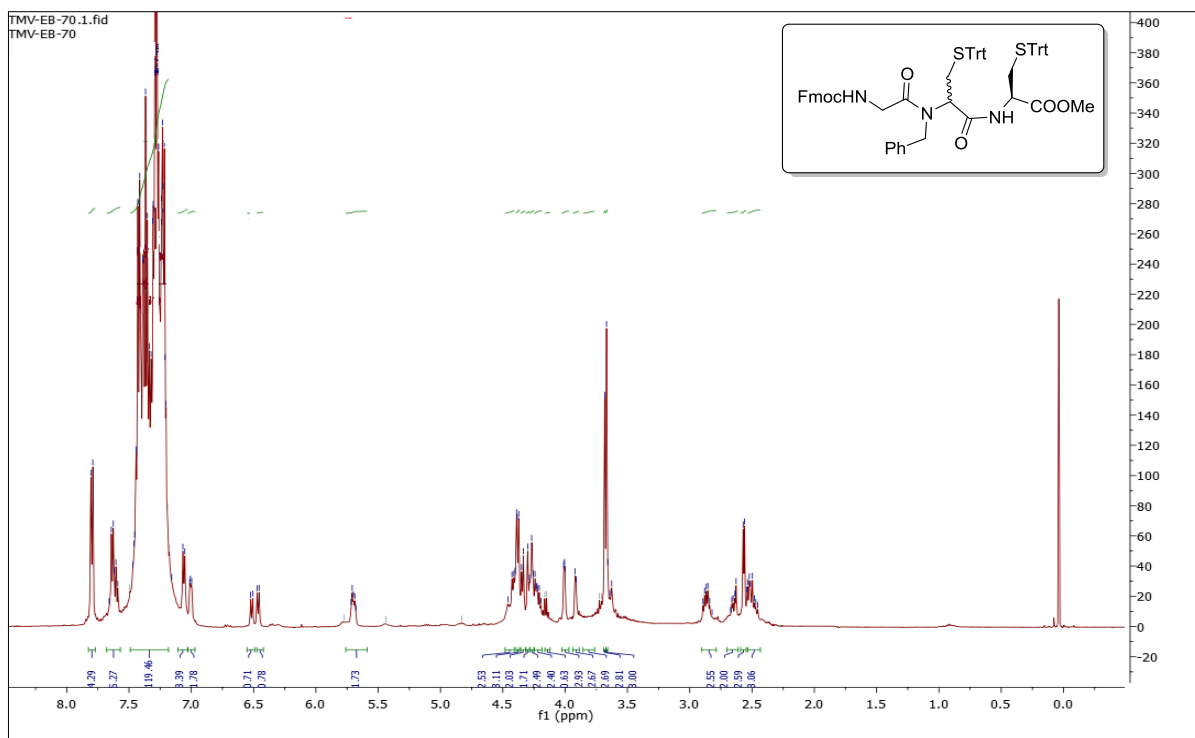

<sup>1</sup>H NMR of (10R)-methyl 6-benzyl-1-(9H-fluoren-9-yl)-3,8-dioxo-7,10-bis((tritylthio)methyl)-2-oxa-4,6,9-triazaundecan-11-oate, **3k**

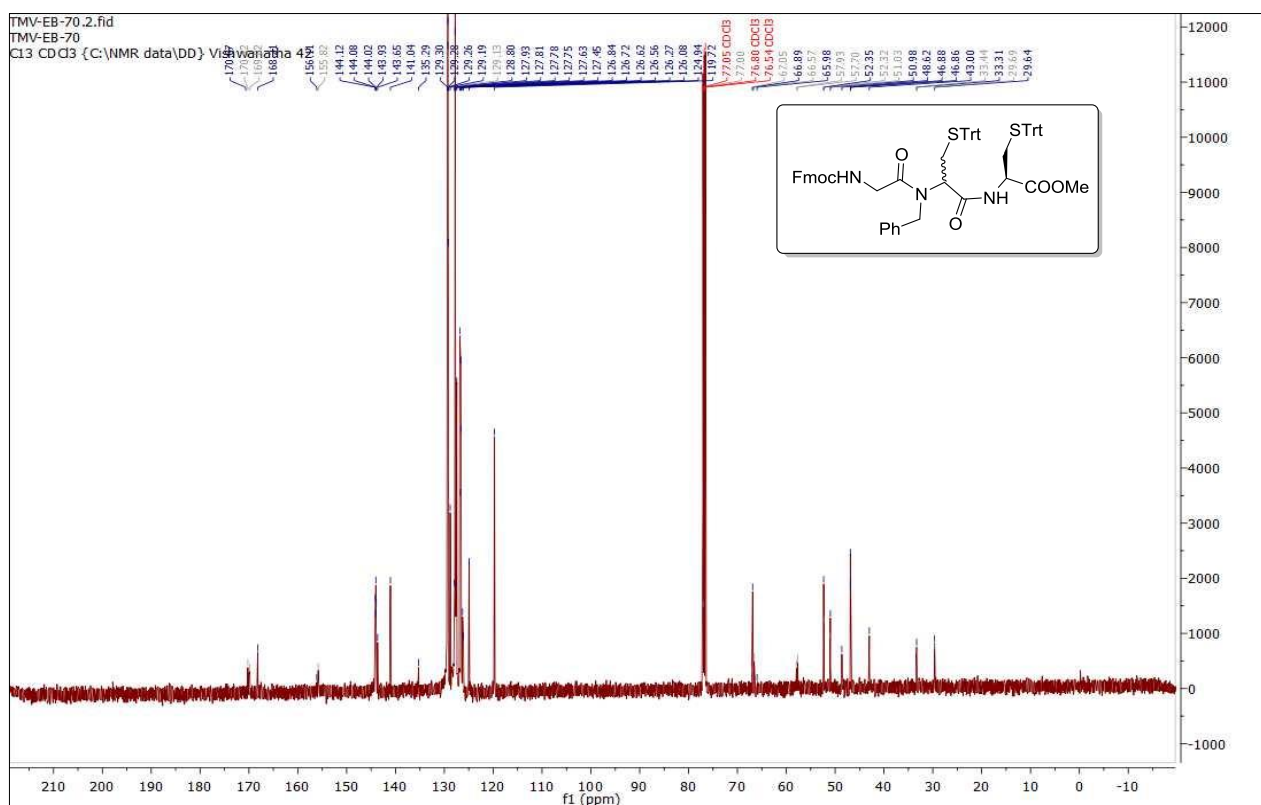

<sup>13</sup>C NMR of (10R)-methyl 6-benzyl-1-(9H-fluoren-9-yl)-3,8-dioxo-7,10-bis((tritylthio)methyl)-2-oxa-4,6,9-triazaundecan-11-oate,

**3k**

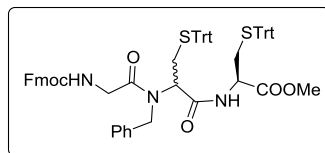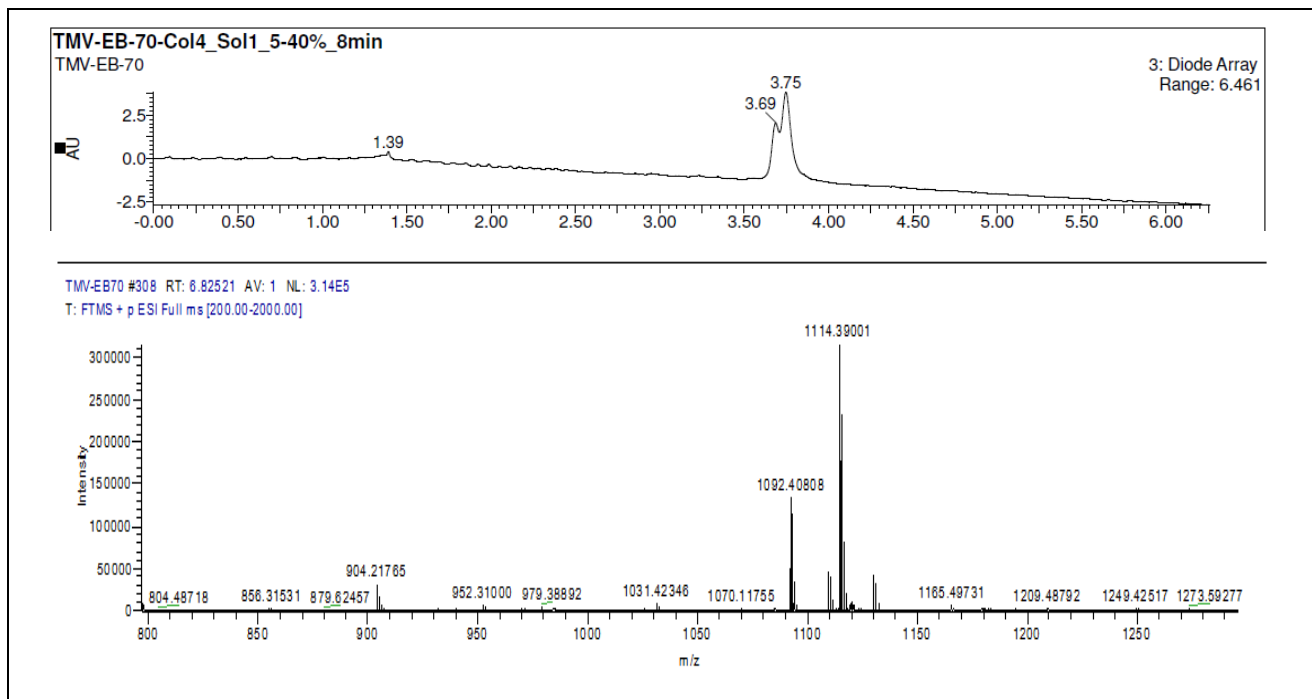

**SFC-HPLC and HRMS of (10R)-methyl 6-benzyl-1-(9H-fluoren-9-yl)-3,8-dioxo-7,10-bis((tritylthio)methyl)-2-oxa-4,6,9-triazaundecan-11-oate, 3k**



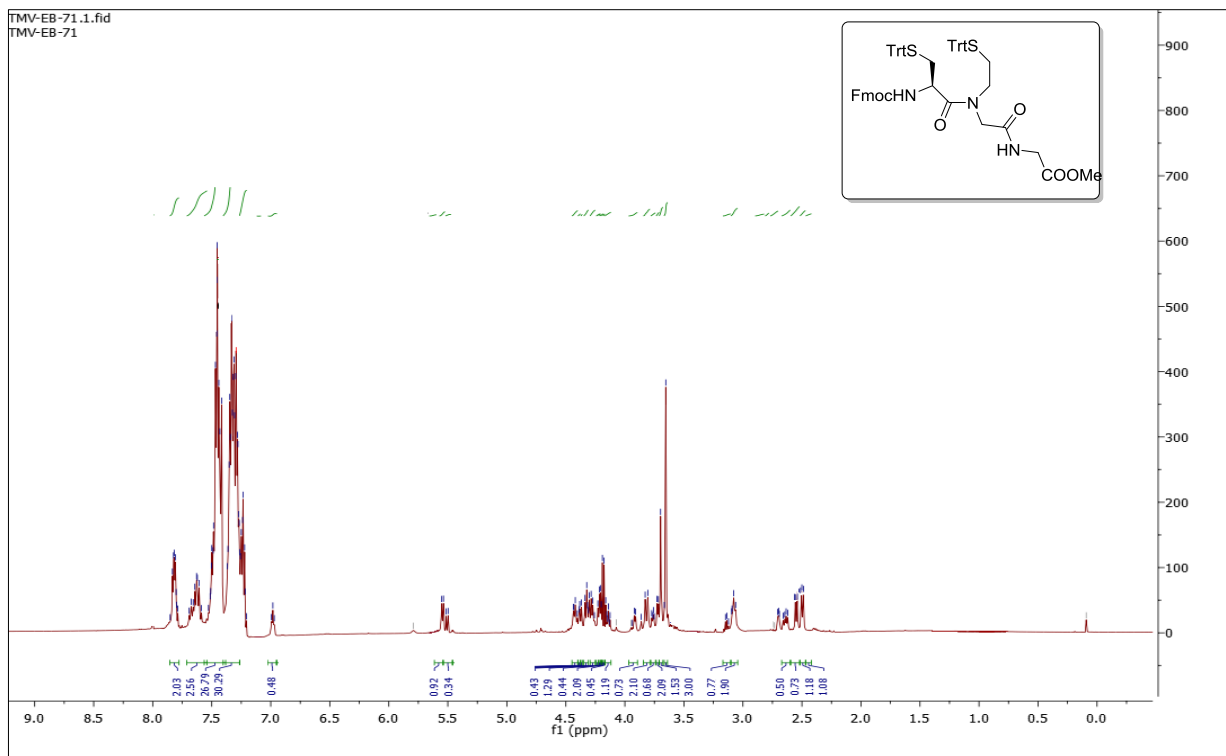

**<sup>1</sup>H NMR of (R)-methyl 1-(9H-fluoren-9-yl)-3,6,9-trioxo-7-(2-(tritylthio)ethyl)-5-((tritylthio)methyl)-2-oxa-4,7,10-triazadodecan-12-oate, 31**

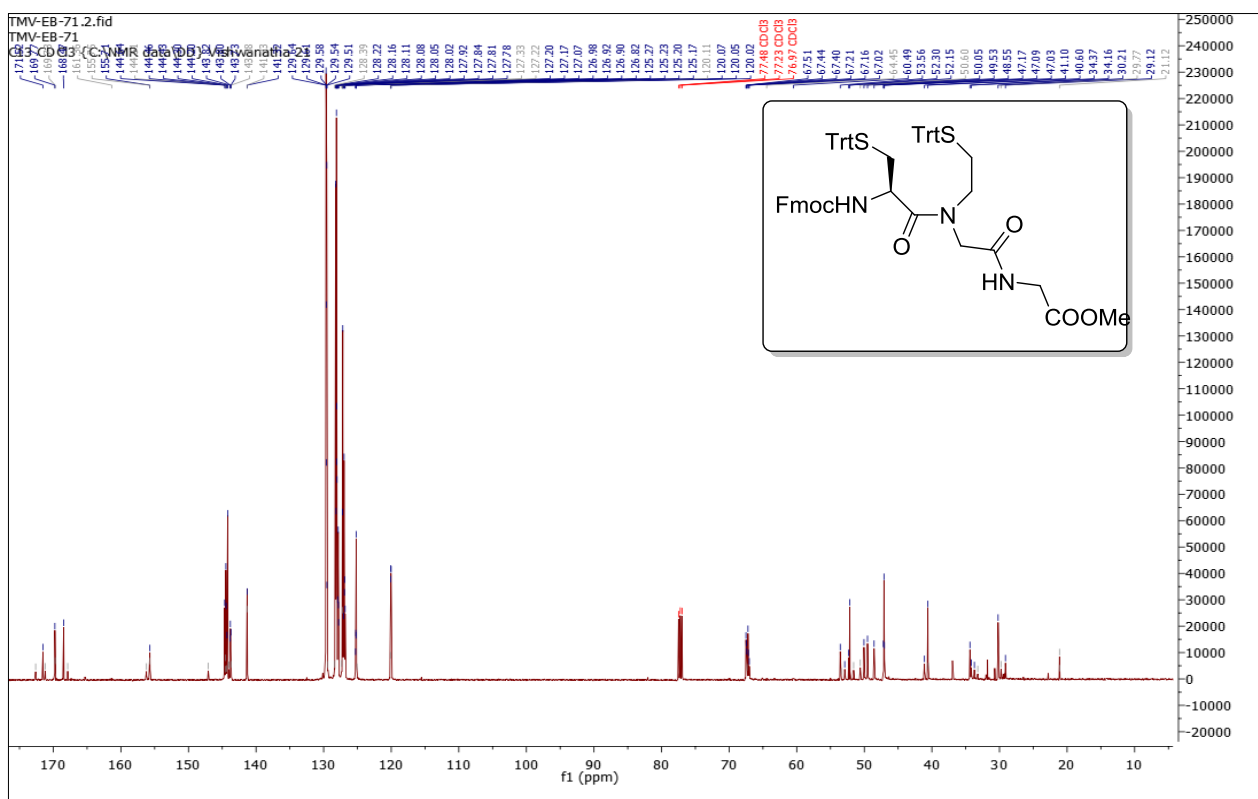

**<sup>13</sup>C NMR of (R)-methyl 1-(9H-fluoren-9-yl)-3,6,9-trioxo-7-(2-(tritylthio)ethyl)-5-((tritylthio)methyl)-2-oxa-4,7,10-triazadodecan-12-oate, 31**

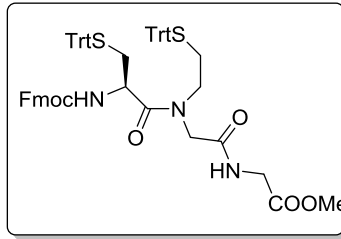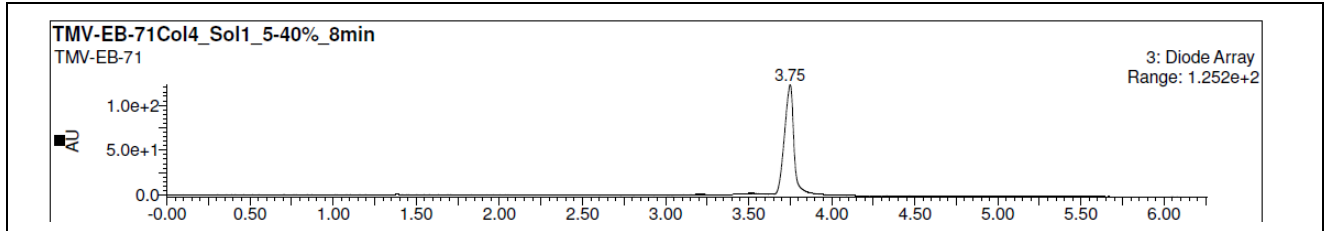

TMV-EB71AB #231-244 RT: 5.21385-5.48058 AV: 14 NL: 1.14E6  
T: FTMS + p ESI Full ms [200.00-2000.00]

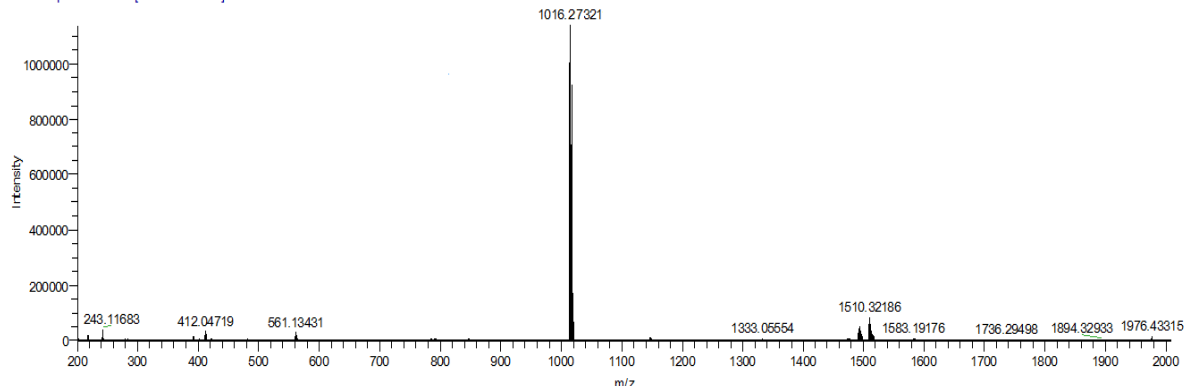

**SFC-HPLC and HRMS of (R)-methyl 1-(9H-fluoren-9-yl)-3,6,9-trioxo-7-(2-(tritylthio)ethyl)-5-((tritylthio)methyl)-2-oxa-4,7,10-triazadodecan-12-oate, 31**



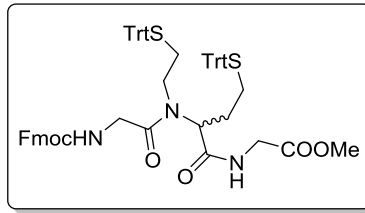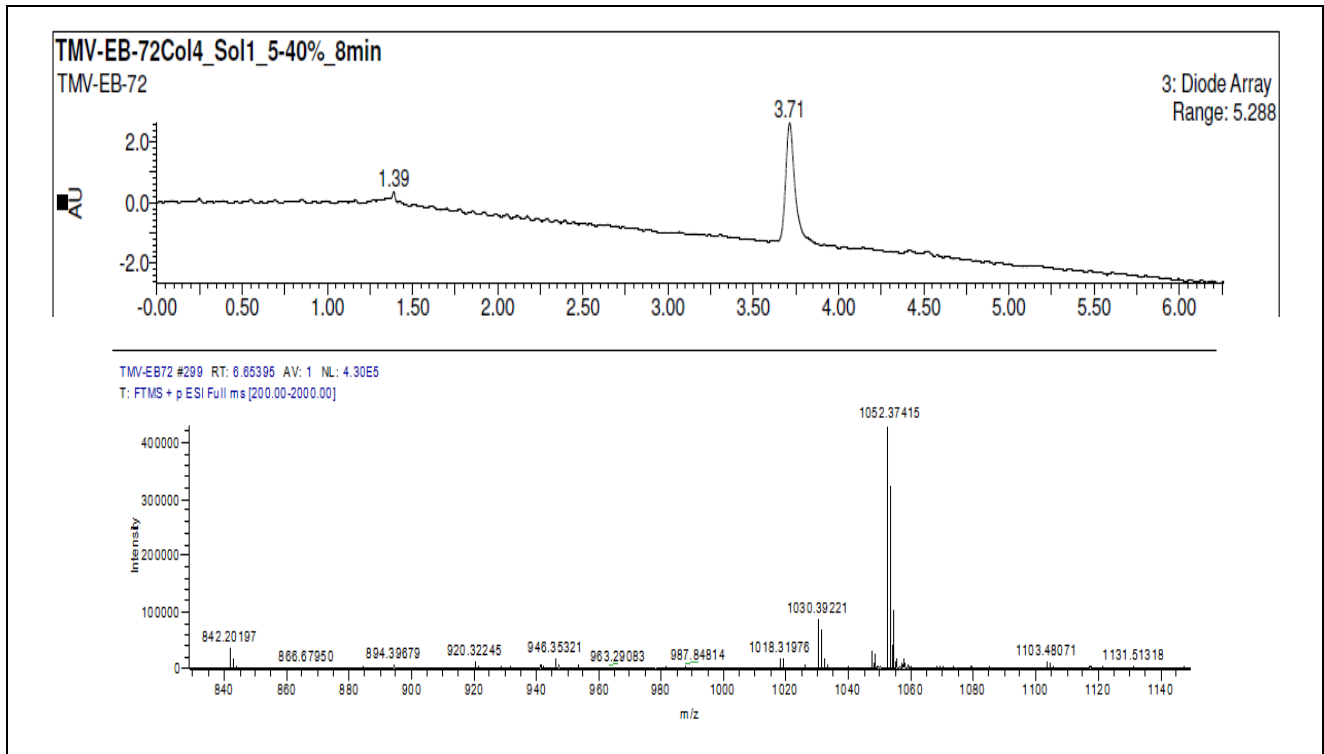

SFC-HPLC and HRMS of methyl 1-(9H-fluoren-9-yl)-3,6,9-trioxo-7,8-bis(2-(tritylthio)ethyl)-2-oxa-4,7,10-triazadodecan-12-oate, 3m

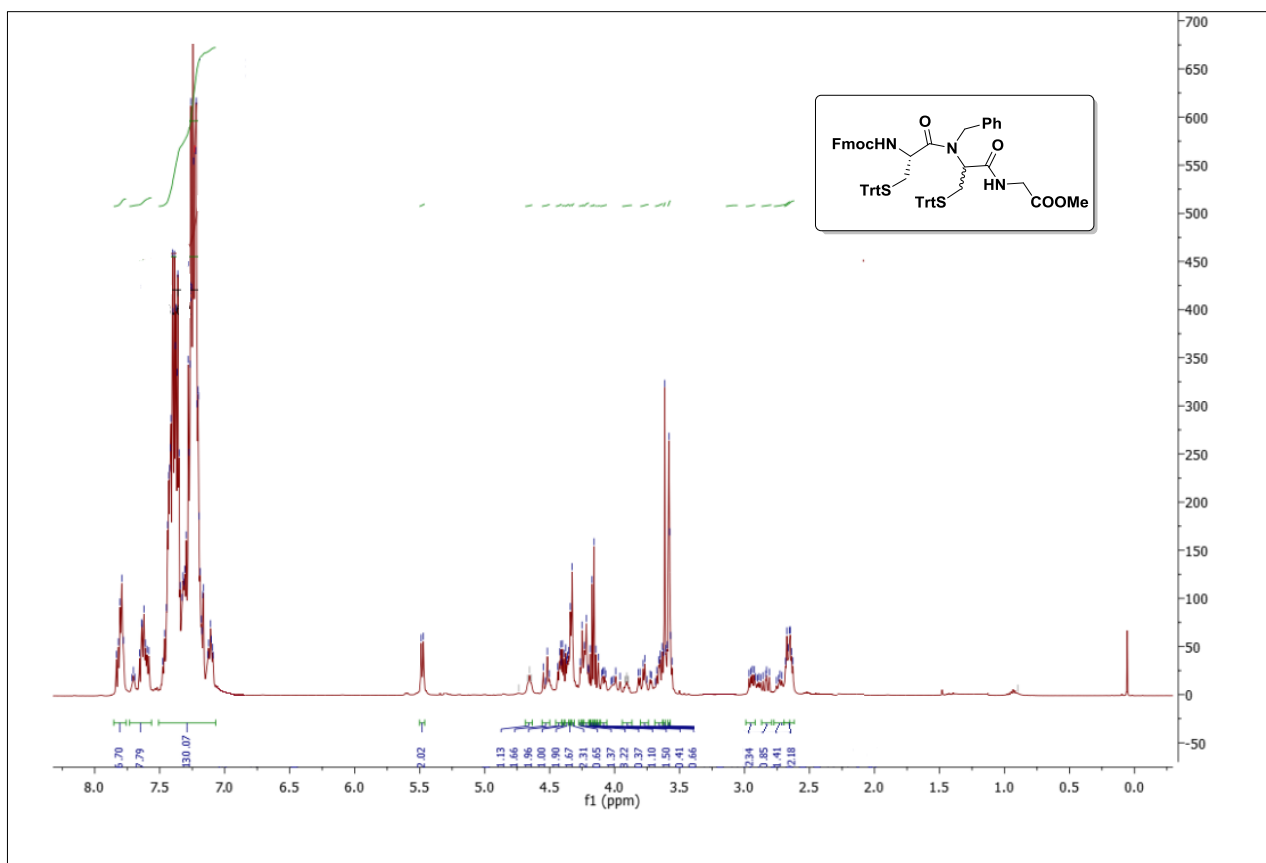

<sup>1</sup>H NMR of (5R)-methyl 7-benzyl-1-(9H-fluoren-9-yl)-3,6,9-trioxo-5,8-bis((tritylthio)methyl)-2-oxa-4,7,10-triazadodecan-12-oate, 3n

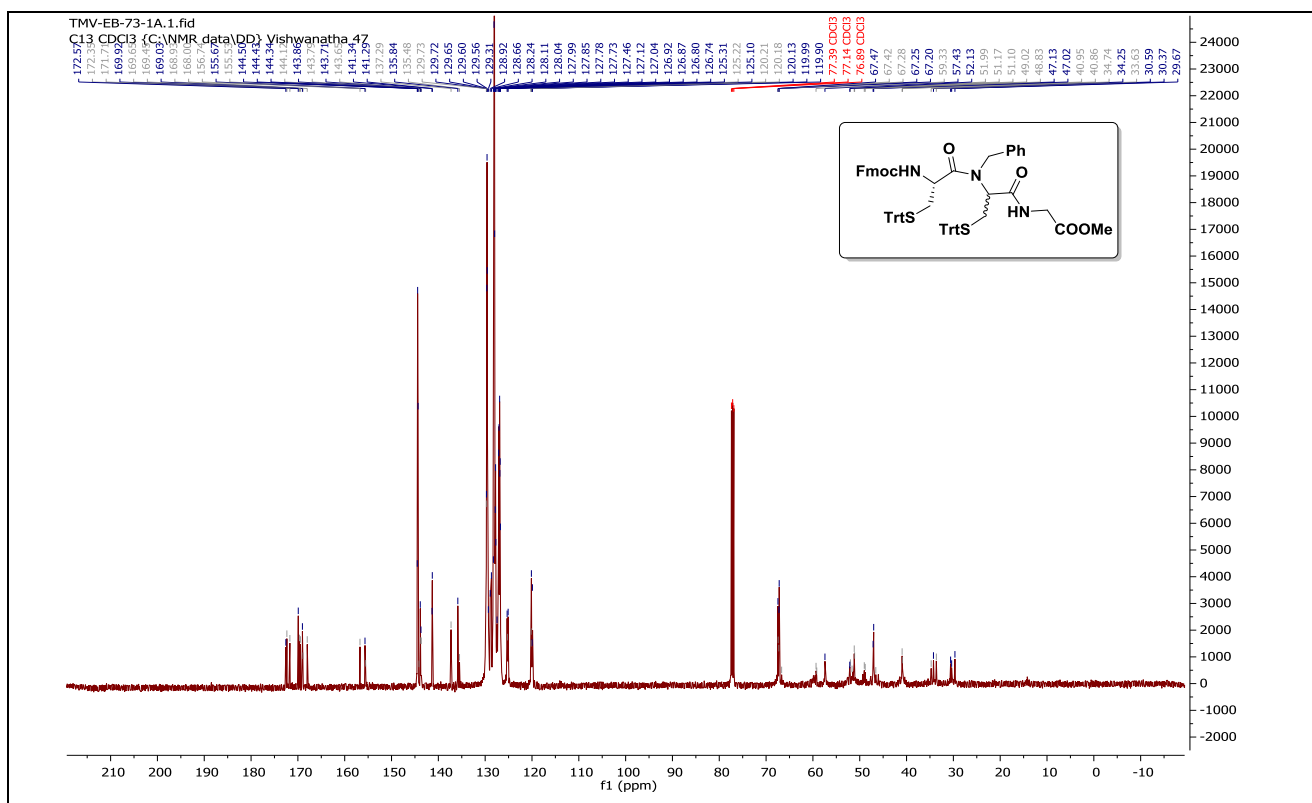

<sup>13</sup>C NMR of (5R)-methyl 7-benzyl-1-(9H-fluoren-9-yl)-3,6,9-trioxo-5,8-bis((tritylthio)methyl)-2-oxa-4,7,10-triazadodecan-12-oate, 3n

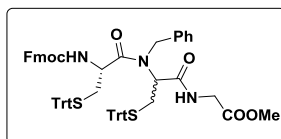

TMV-EB-30-11A Col3\_Sol1\_5-40%\_8min

TMV-EB-30-11A

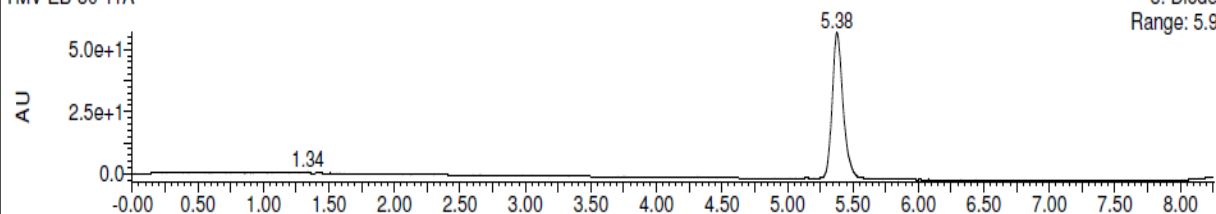

TMV-EB73 #310 RT: 6.82784 AV: 1 NL: 9.45E5

T: FTMS + p ESI Full ms [200.00-2000.00]

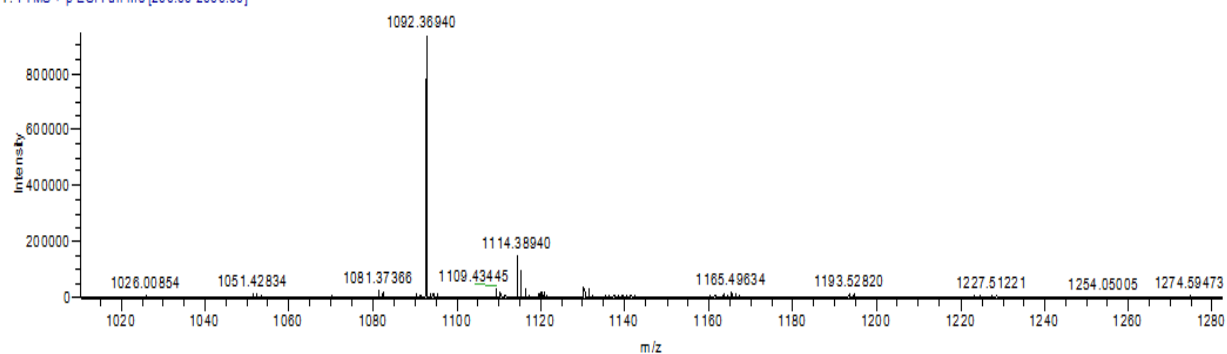

**SFC-HPLC and HRMS of (5R)-methyl 7-benzyl-1-(9H-fluoren-9-yl)-3,6,9-trioxo-5,8-bis((tritylthio)methyl)-2-oxa-4,7,10-triazadodecan-12-oate, 3n**

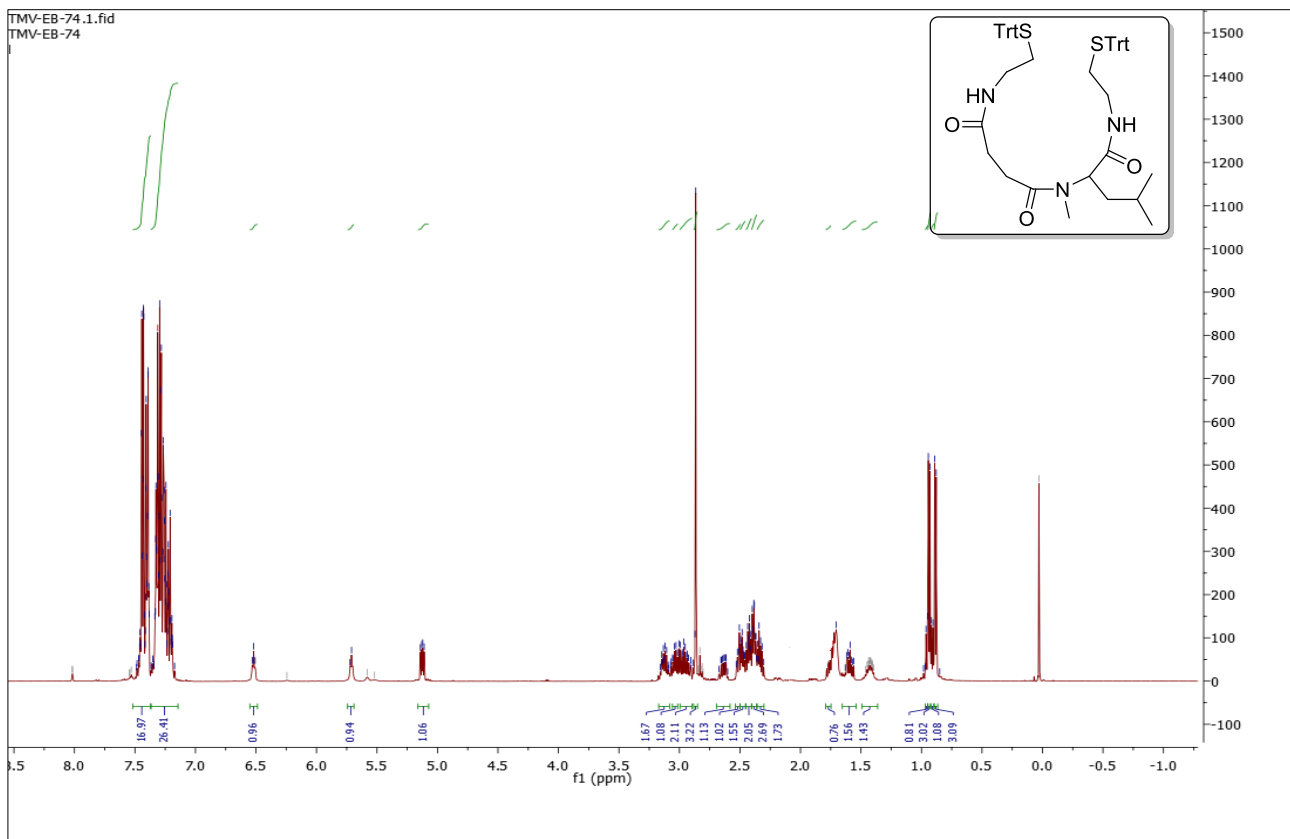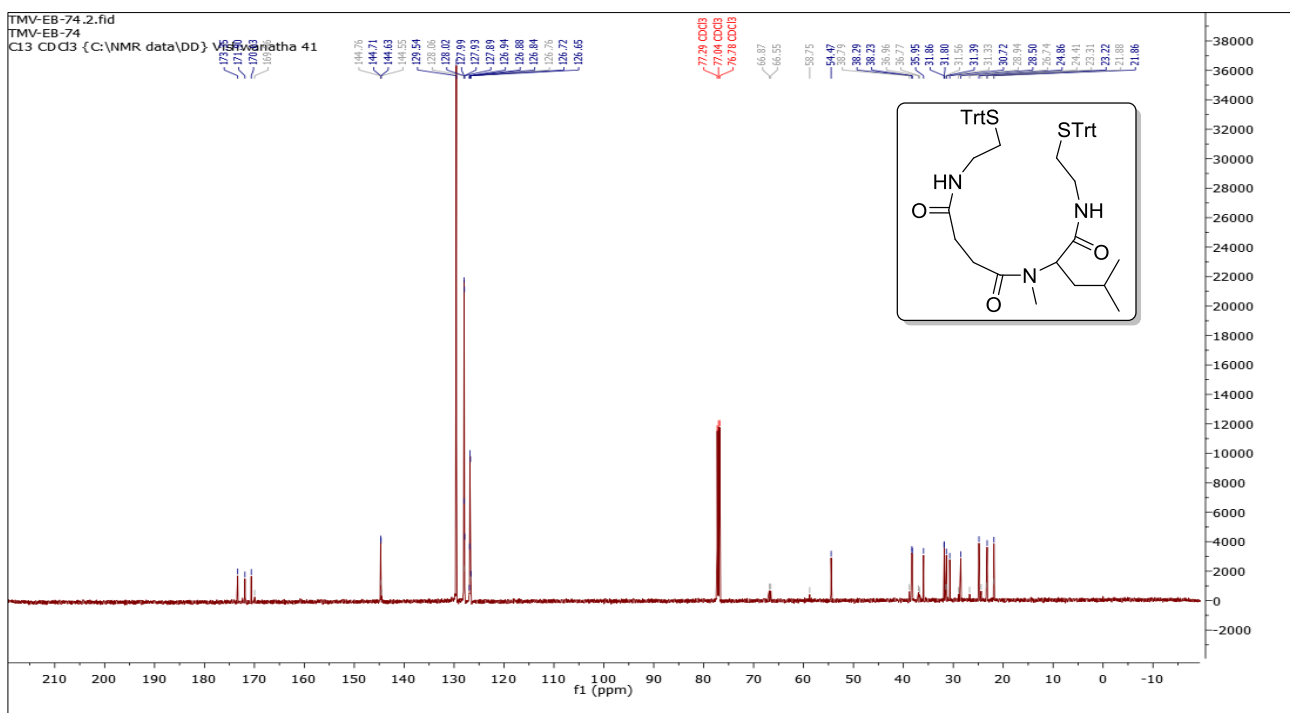

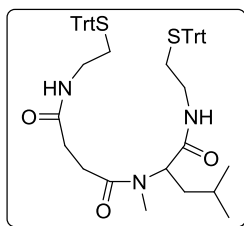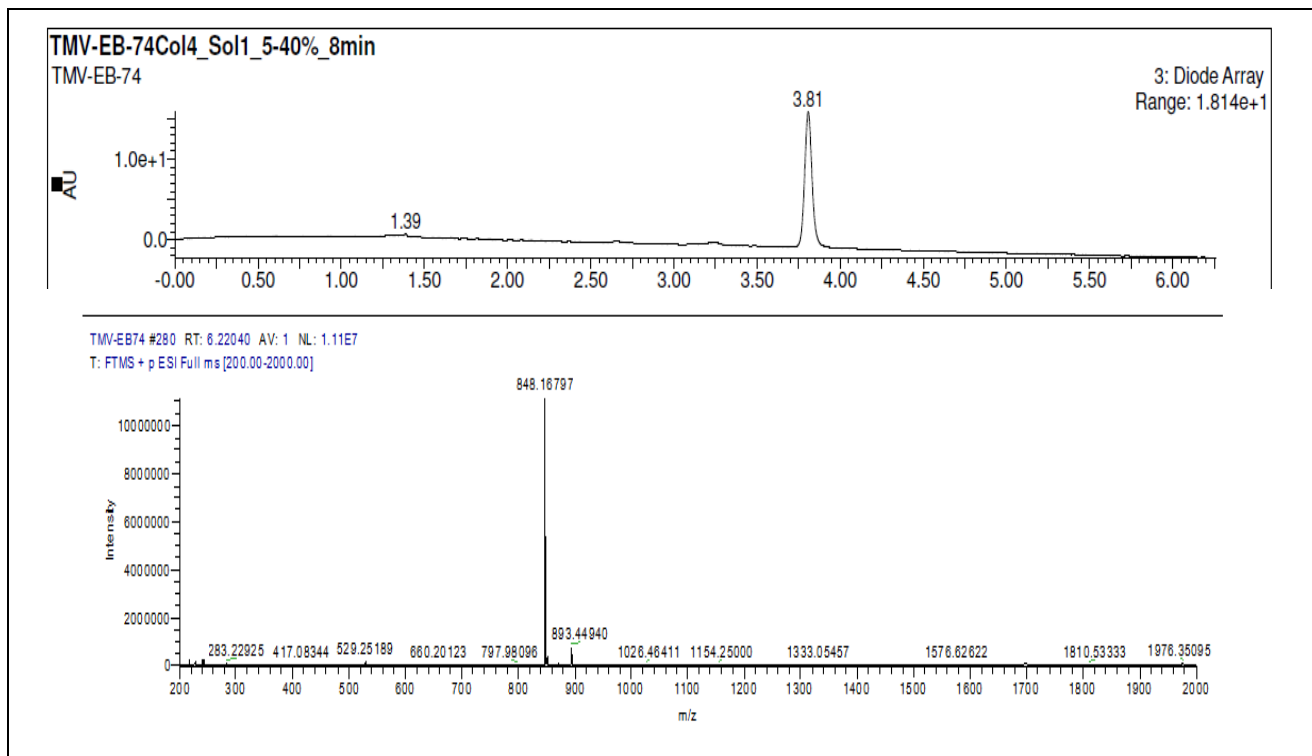

**SFC-HPLC and HRMS of N<sup>1</sup>-methyl-N<sup>1</sup>-(4-methyl-1-oxo-1-((2-(tritylthio)ethyl)amino)pentan-2-yl)-N<sup>4</sup>-(2-(tritylthio)ethyl)succinamide, 3o**



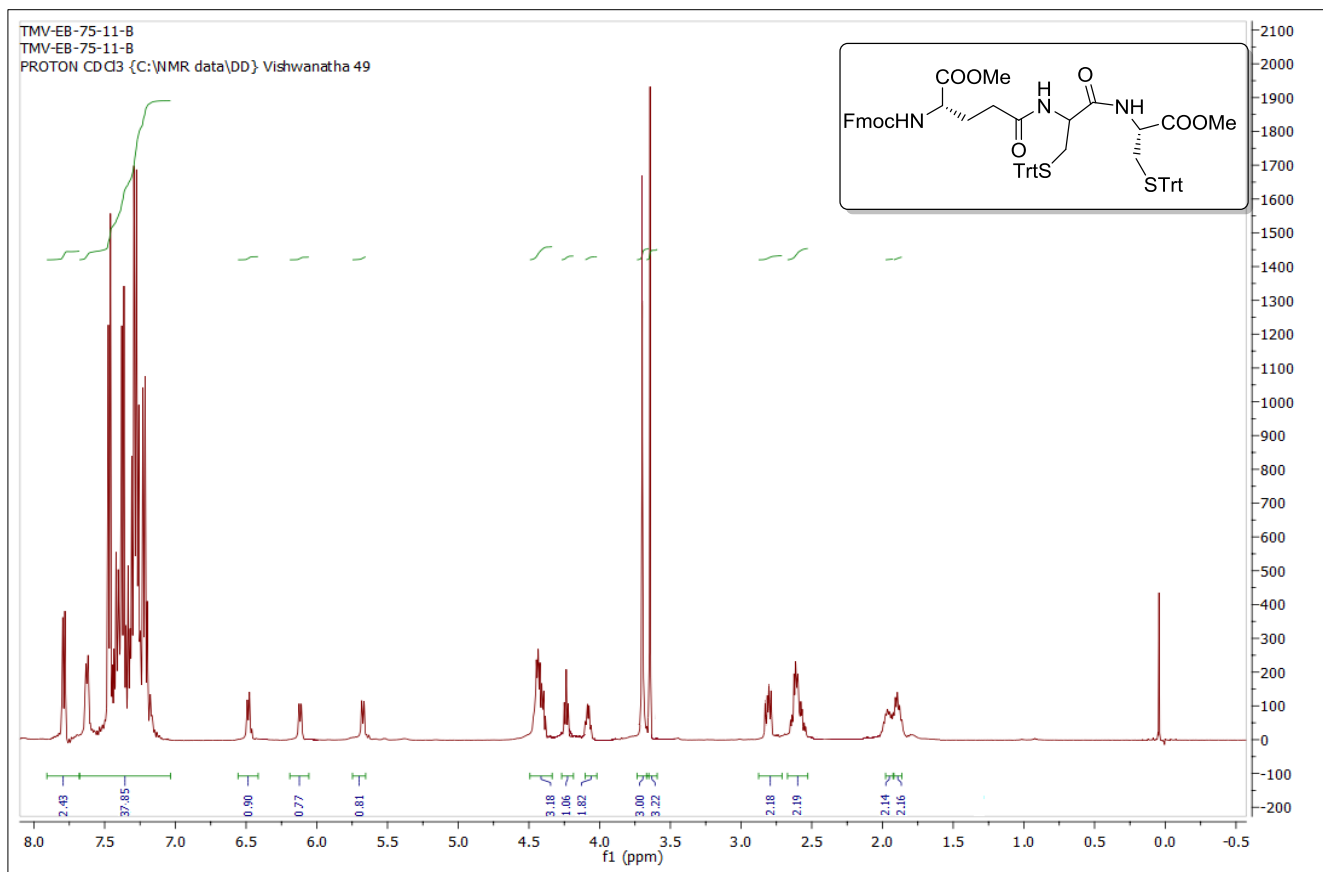

**<sup>1</sup>H NMR of (5S,13S)-methyl 1-(9H-fluoren-9-yl)-5-(methoxycarbonyl)-3,8,11-trioxa-10,13-bis((tritylthio)methyl)-2-oxa-4,9,12-triazatetradecan-14-oate, 3p**

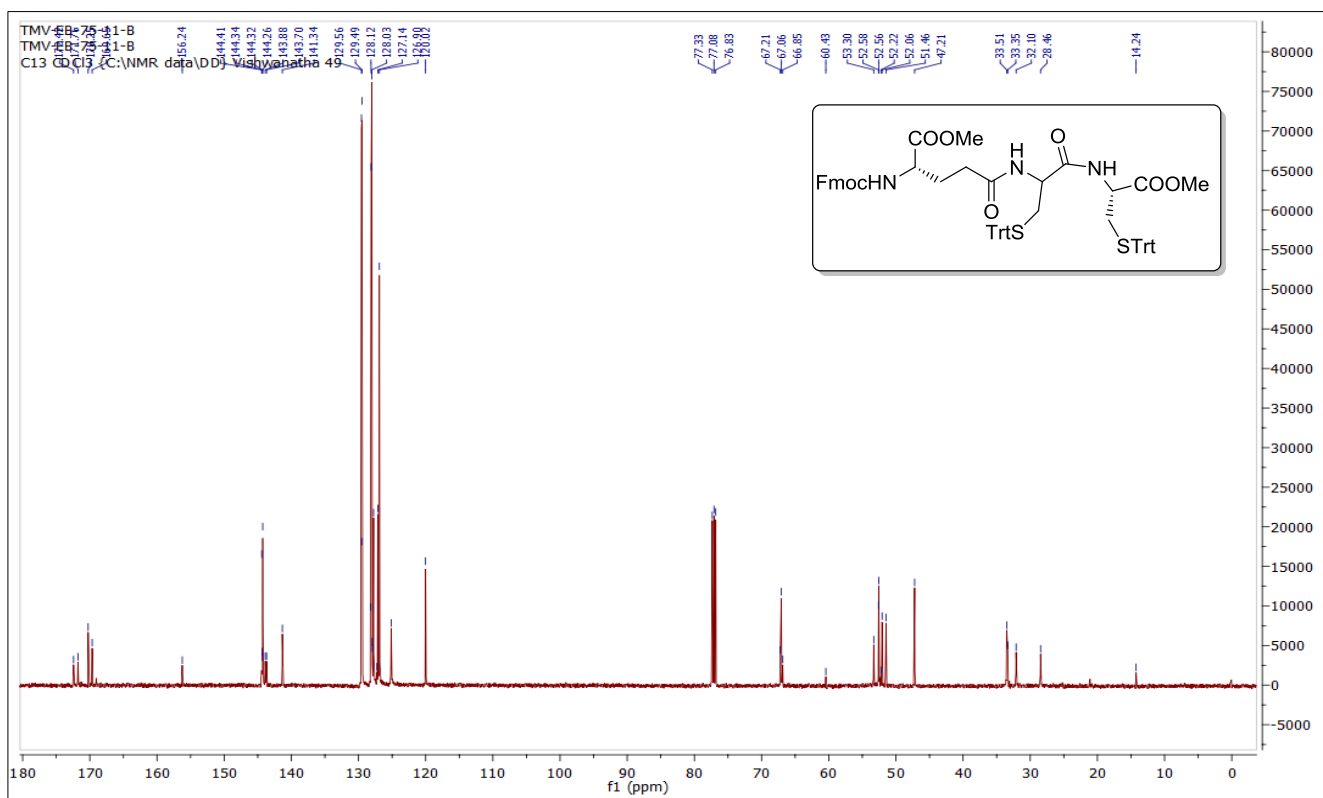

**<sup>13</sup>C NMR of (5S,13S)-methyl 1-(9H-fluoren-9-yl)-5-(methoxycarbonyl)-3,8,11-trioxa-10,13-bis((tritylthio)methyl)-2-oxa-4,9,12-triazatetradecan-14-oate, 3p**

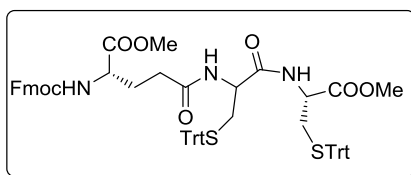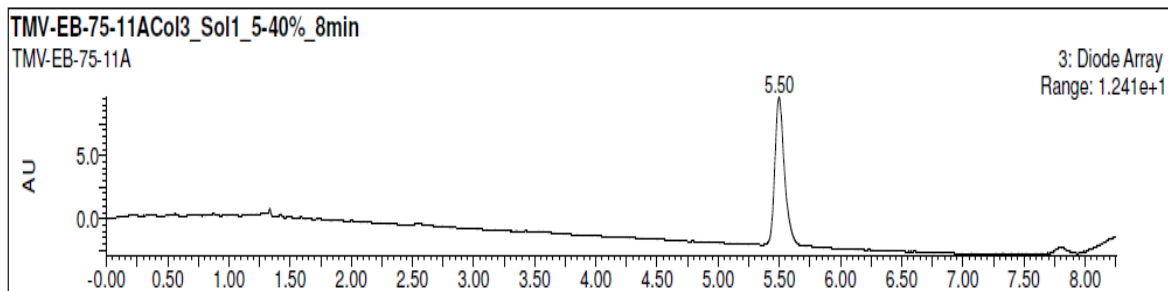

TMV-EB75 #287 RT: 6.44718 AV: 1 NL: 7.37E6  
T: FTMS + p ESI Full ms [200.00-2000.00]

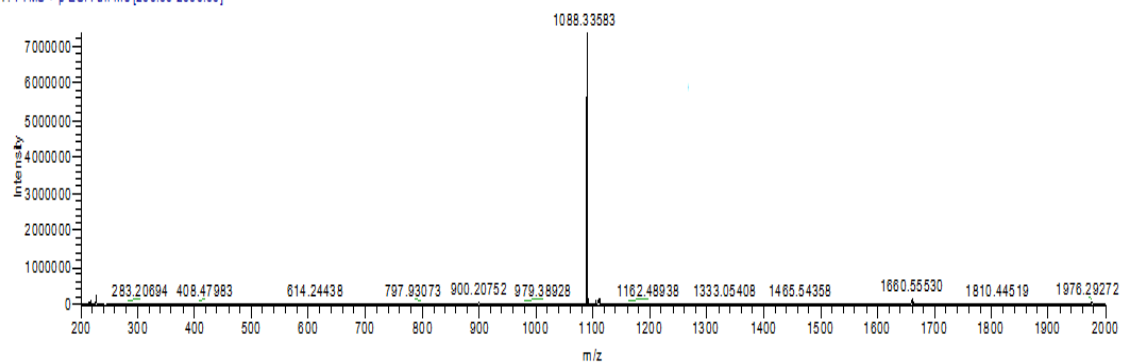

**SFC-HPLC and HRMS of (5S,13S)-methyl 1-(9H-fluoren-9-yl)-5-(methoxycarbonyl)-3,8,11-trioxo-10,13-bis((tritylthio)methyl)-2-oxa-4,9,12-triazatetradecan-14-oate, 3p**



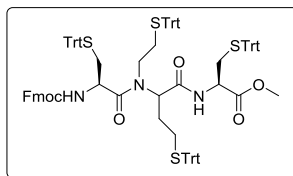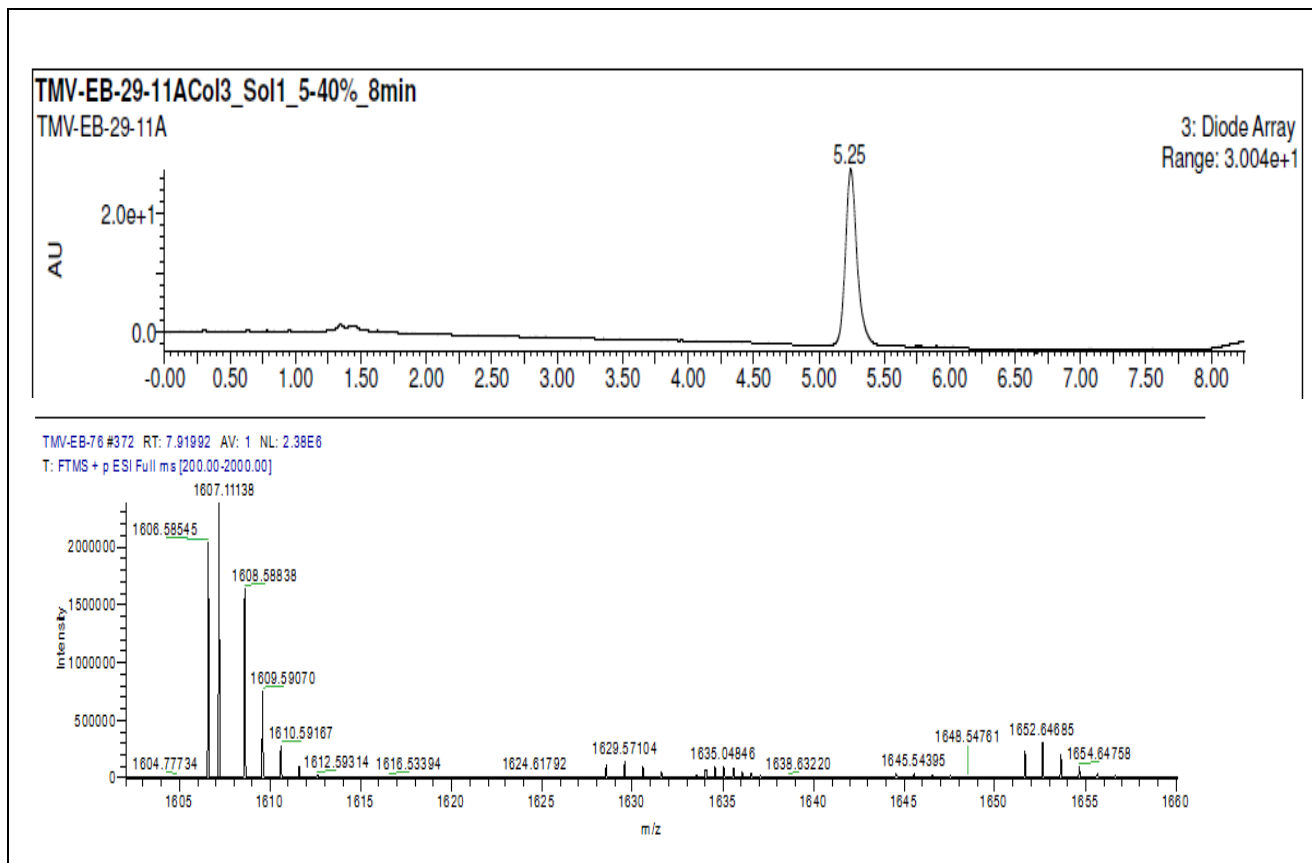

**SFC-HPLC and HRMS of (5R,11R)-methyl 1-(9H-fluoren-9-yl)-3,6,9-trioxo-7,8-bis(2-(tritylthio)ethyl)-5,11-bis((tritylthio)methyl)-2-oxa-4,7,10-triazadodecan-12-oate, 3q**



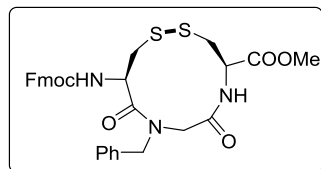

EB27d\_Col3\_Sol1\_5-30%\_6min  
EB27d

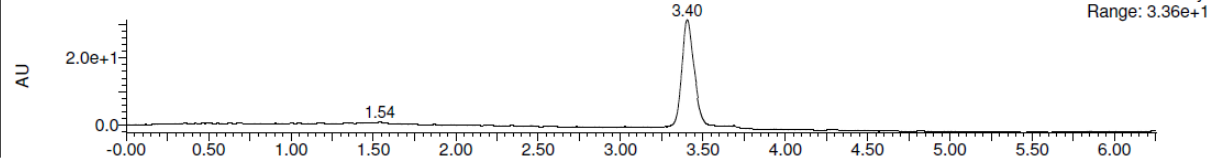

TMV-EB27 #217 RT: 4.89890 AV: 1 NL: 1.87E7  
T: FTMS + p ESI Full ms [200.00-2000.00]

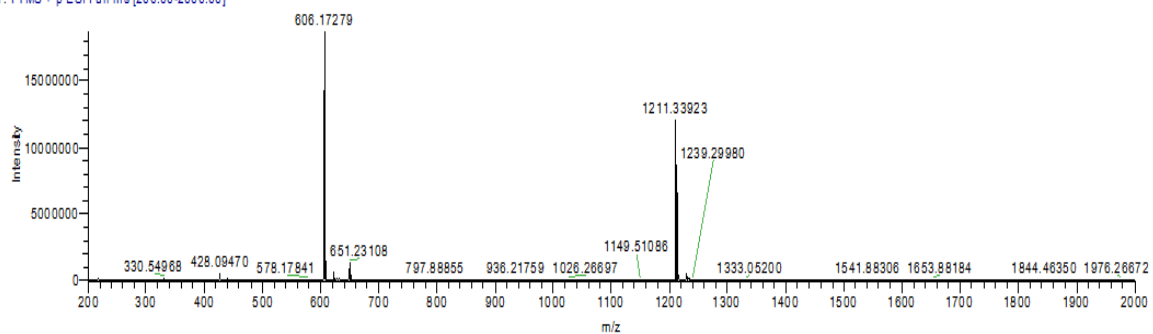

**SFC-HPLC and HRMS of (4R,10R)-methyl 10-(((9H-fluoren-9-yl)methoxy)carbonyl)amino-8-benzyl-6,9-dioxo-1,2-dithia-5,8-diazacycloundecane-4-carboxylate, 4a**

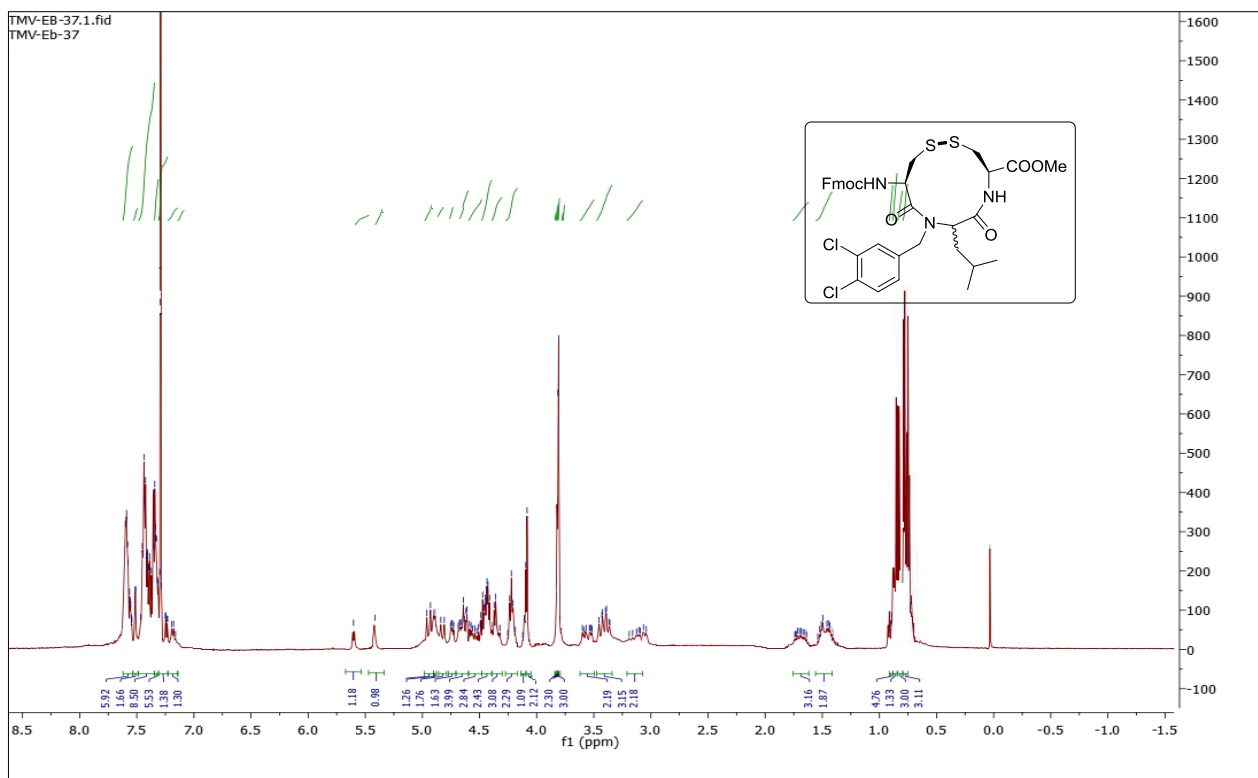

**<sup>1</sup>H NMR of (4R,10R)-methyl 10-(((9H-fluoren-9-yl)methoxy)carbonyl)amino-8-(3,4-dichlorobenzyl)-7-isobutyl-6,9-dioxo-1,2-dithia-5,8-diazacycloundecane-4-carboxylate, 4b**

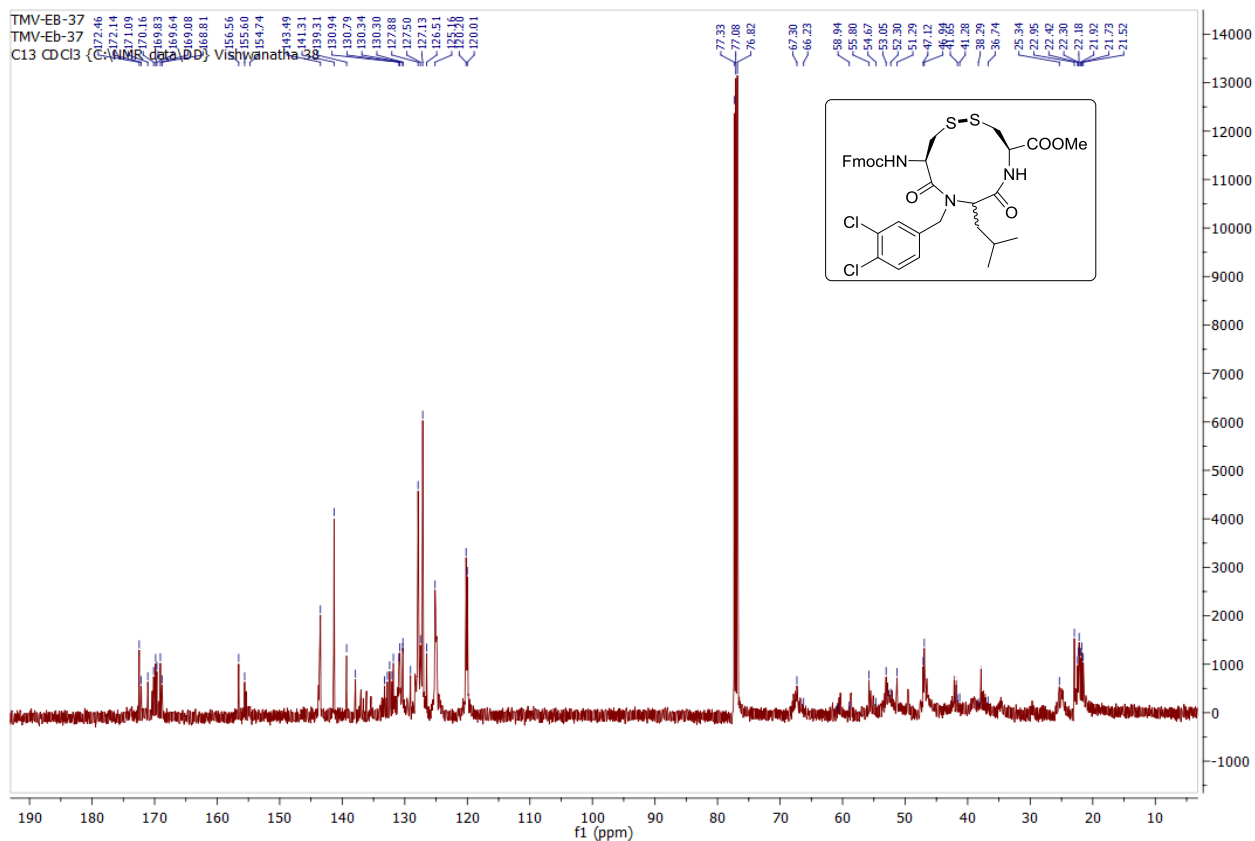

**<sup>13</sup>C NMR of (4R,10R)-methyl 10-(((9H-fluoren-9-yl)methoxy)carbonyl)amino-8-(3,4-dichlorobenzyl)-7-isobutyl-6,9-dioxo-1,2-dithia-5,8-diazacycloundecane-4-carboxylate, 4b**

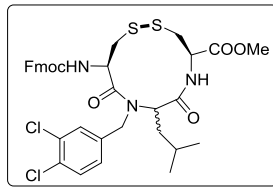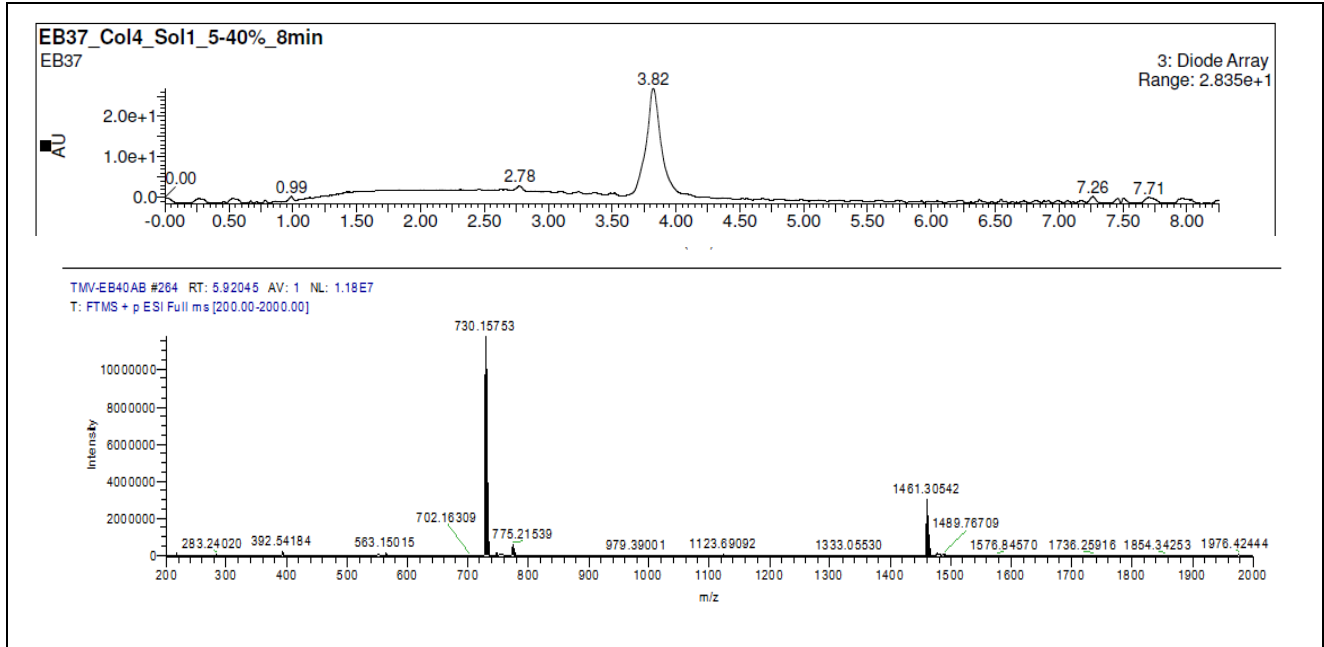

**SFC-HPLC and HRMS of (4R,10R)-methyl 10-(((9H-fluoren-9-yl)methoxy)carbonyl)amino)-8-(3,4-dichlorobenzyl)-7-isobutyl-6,9-dioxo-1,2-dithia-5,8-diazacycloundecane-4-carboxylate, 4b**



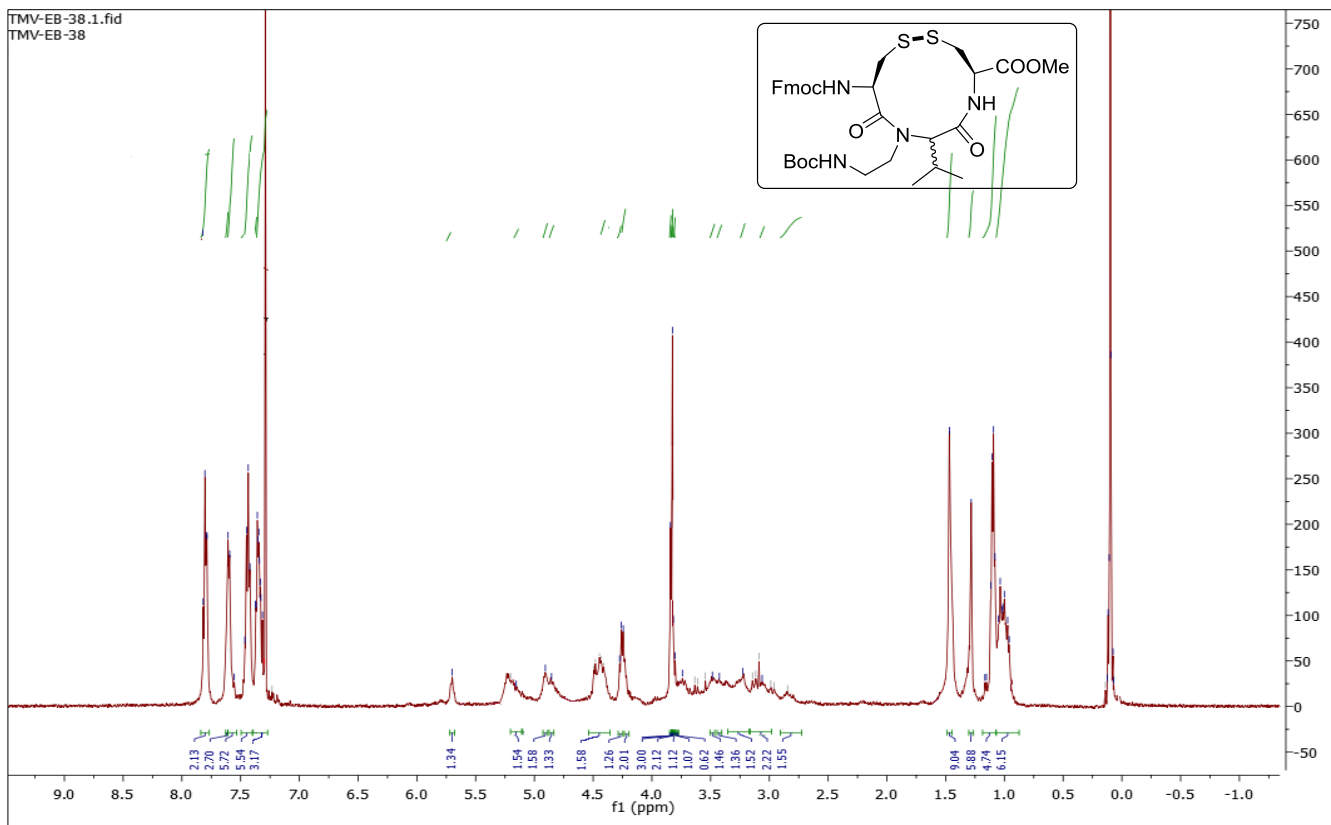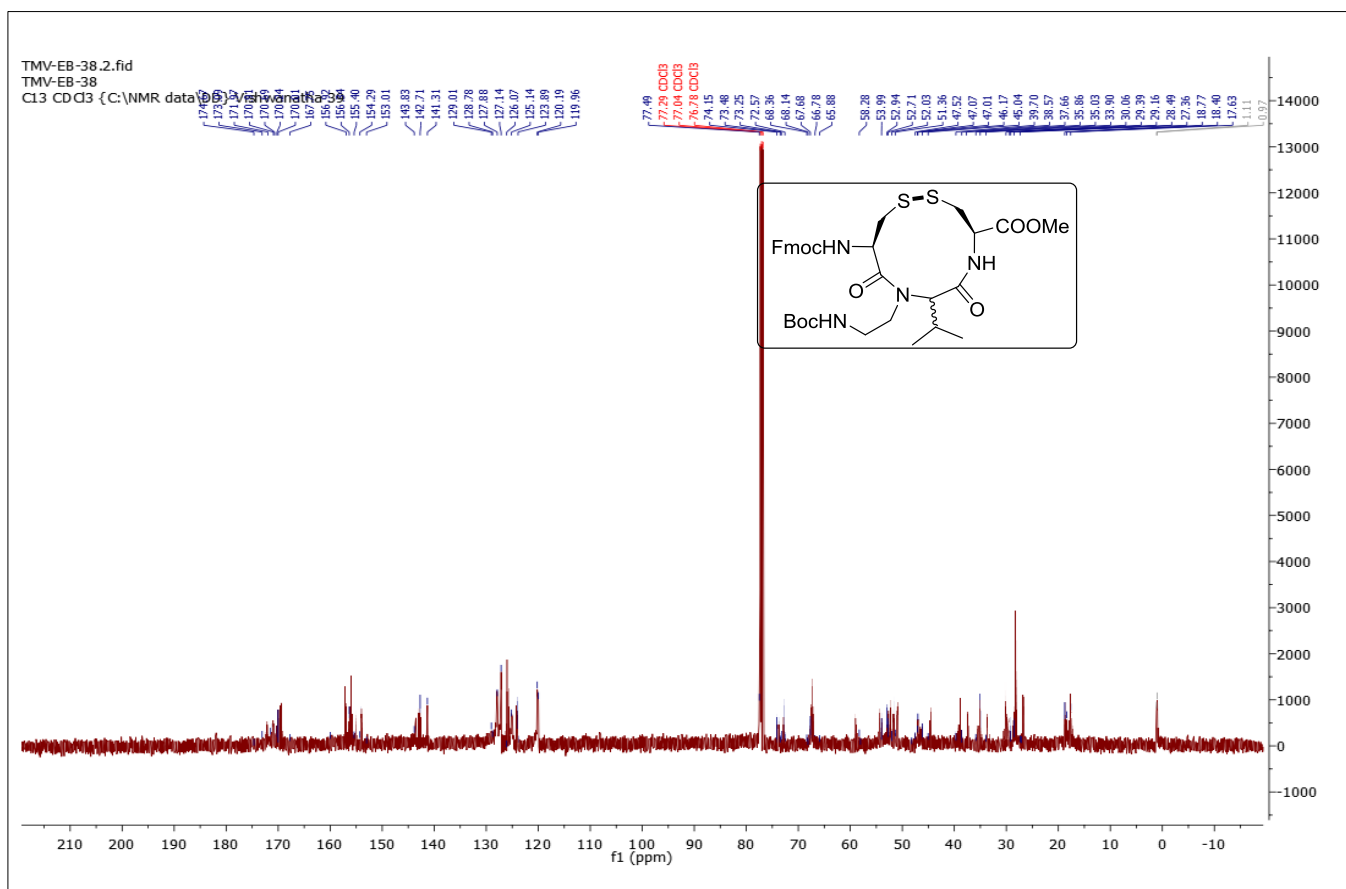

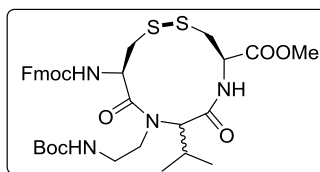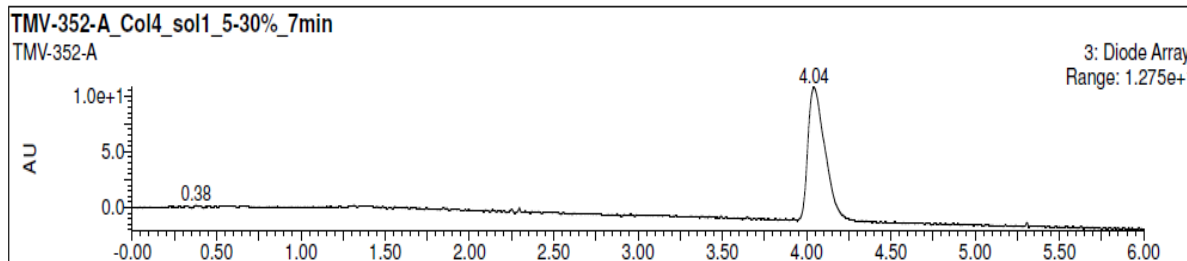

TMV-EB38 #235 RT: 5.26707 AV: 1 NL: 2.91E7  
T: FTMS + p ESI Full ms [200.00-2000.00]

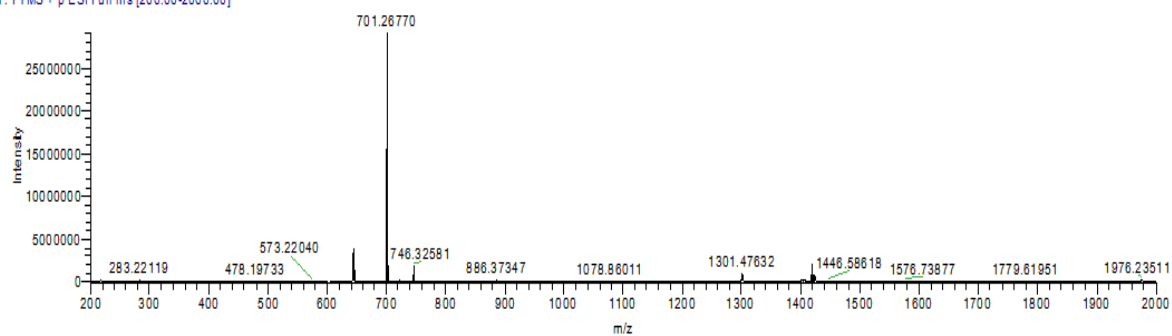

**SFC-HPLC and HRMS of (4R,10R)-methyl 10-(((9H-fluoren-9-yl)methoxy)carbonyl)amino)-8-(2-((tert-butoxycarbonyl)amino)ethyl)-7-isopropyl-6,9-dioxo-1,2-dithia-5,8-diazacycloundecane-4-carboxylate, 4c**

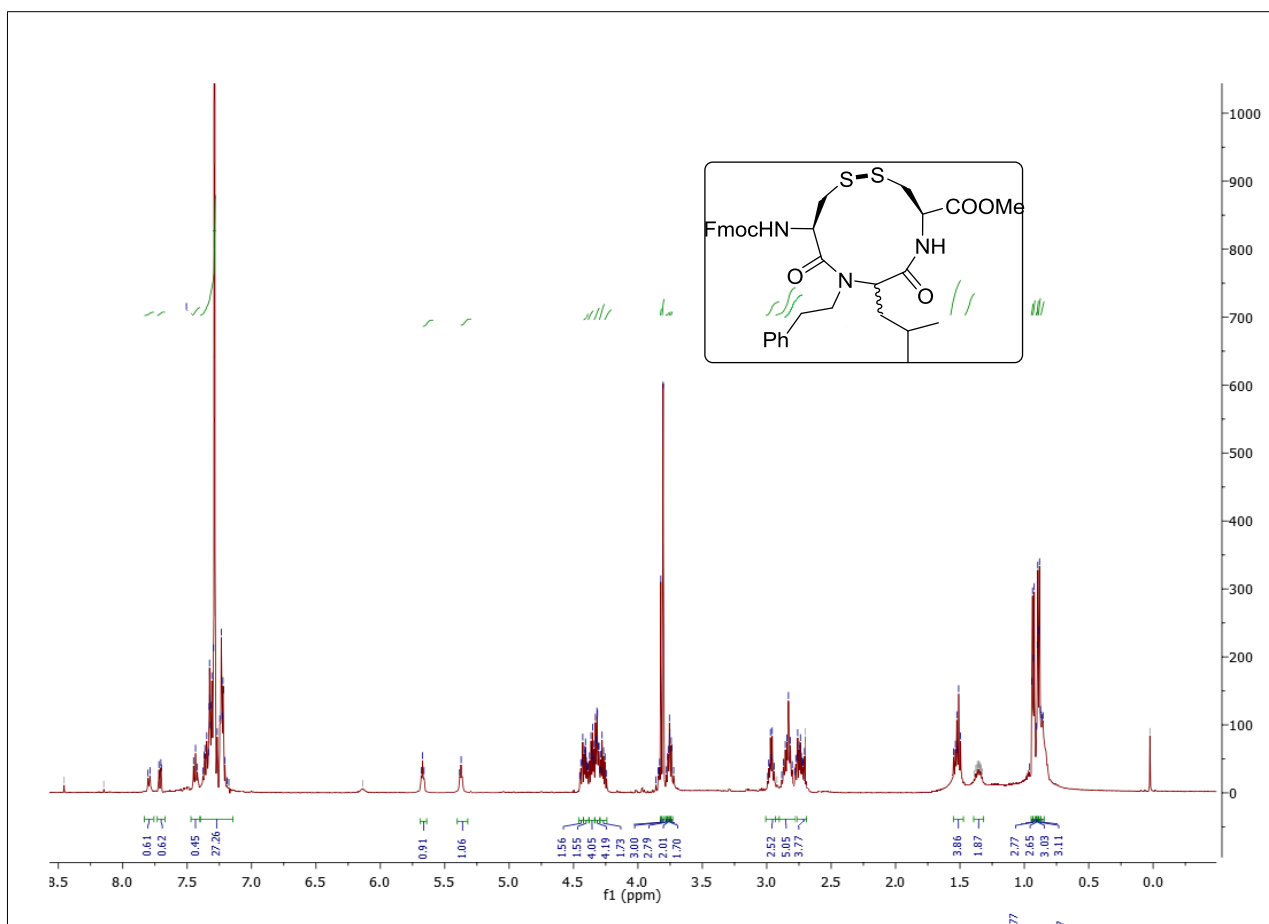

**<sup>1</sup>H NMR of (4R,10R)-methyl 10-(((9H-fluoren-9-yl)methoxy)carbonyl)amino-7-isobutyl-6,9-dioxo-8-phenethyl-1,2-dithia-5,8-diazacycloundecane-4-carboxylate, 4d**

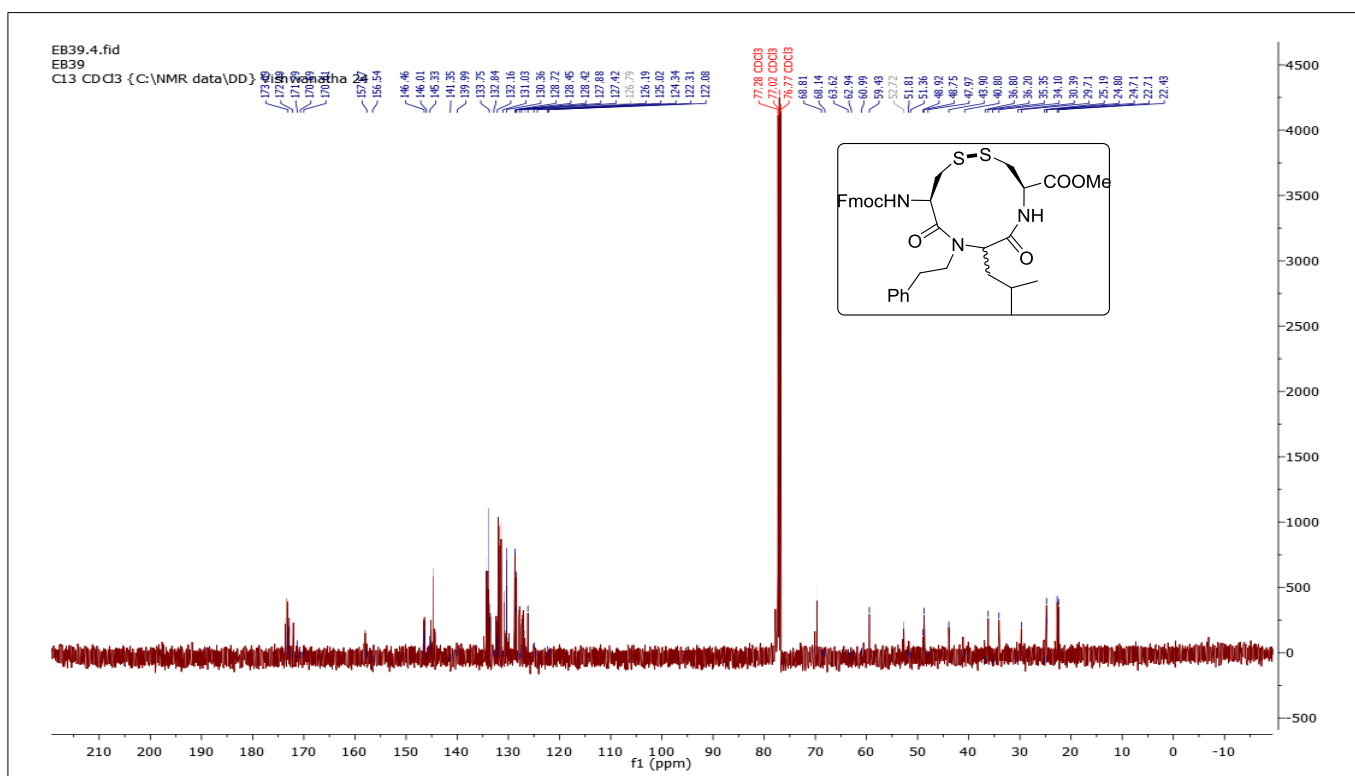

**<sup>13</sup>C NMR of (4R,10R)-methyl 10-(((9H-fluoren-9-yl)methoxy)carbonyl)amino-7-isobutyl-6,9-dioxo-8-phenethyl-1,2-dithia-5,8-diazacycloundecane-4-carboxylate, 4d**

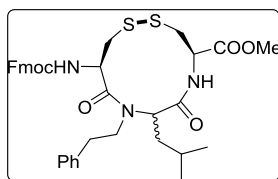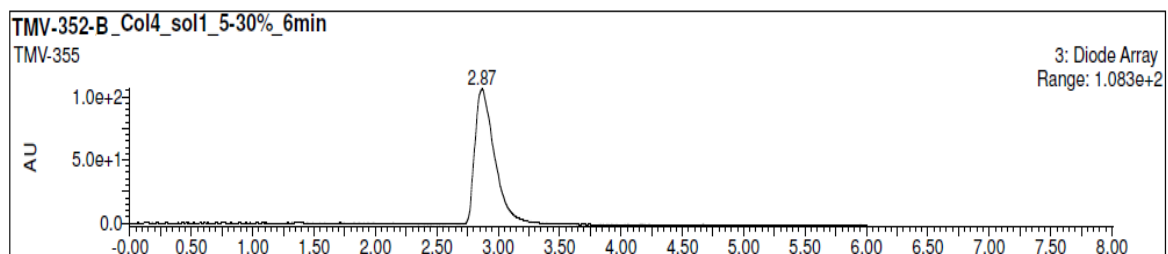

TMV-EB39 #274 RT: 5.75234 AV: 1 NL: 3.59E7  
T: FTMS + p ESI Full ms [200.00-2000.00]

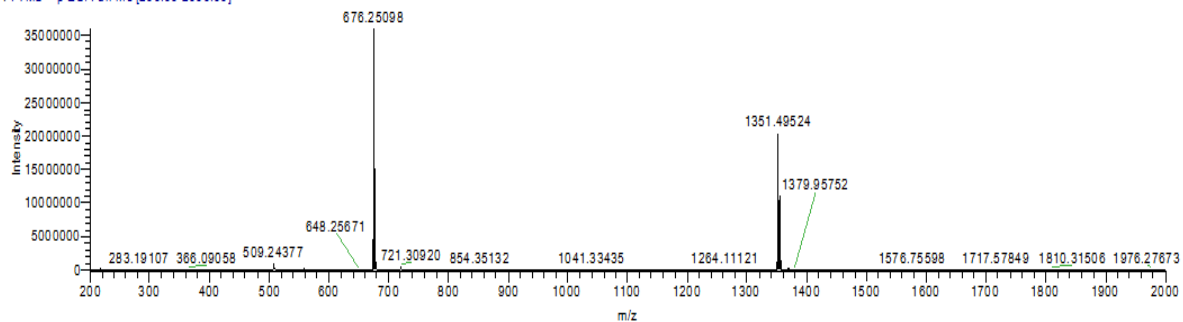

**SFC-HPLC and HRMS of (4R,10R)-methyl 10-(((9H-fluoren-9-yl)methoxy)carbonyl)amino)-7-isobutyl-6,9-dioxo-8-phenethyl-1,2-dithia-5,8-diazacycloundecane-4-carboxylate, 4d**



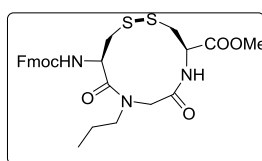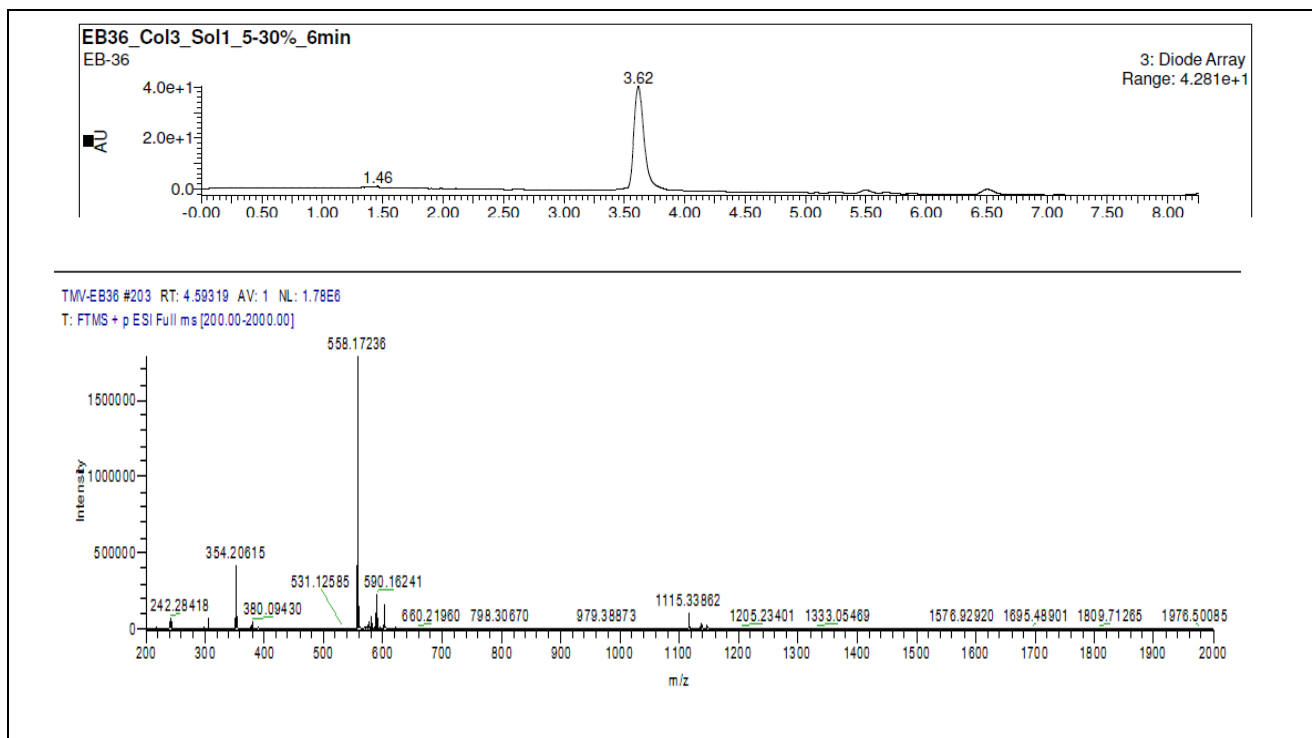

SFC-HPLC and HRMS of (4R,10R)-methyl 10-(((9H-fluoren-9-yl)methoxy)carbonyl)amino)-6,9-dioxo-8-propyl-1,2-dithia-5,8-diazacycloundecane-4-carboxylate, 4e

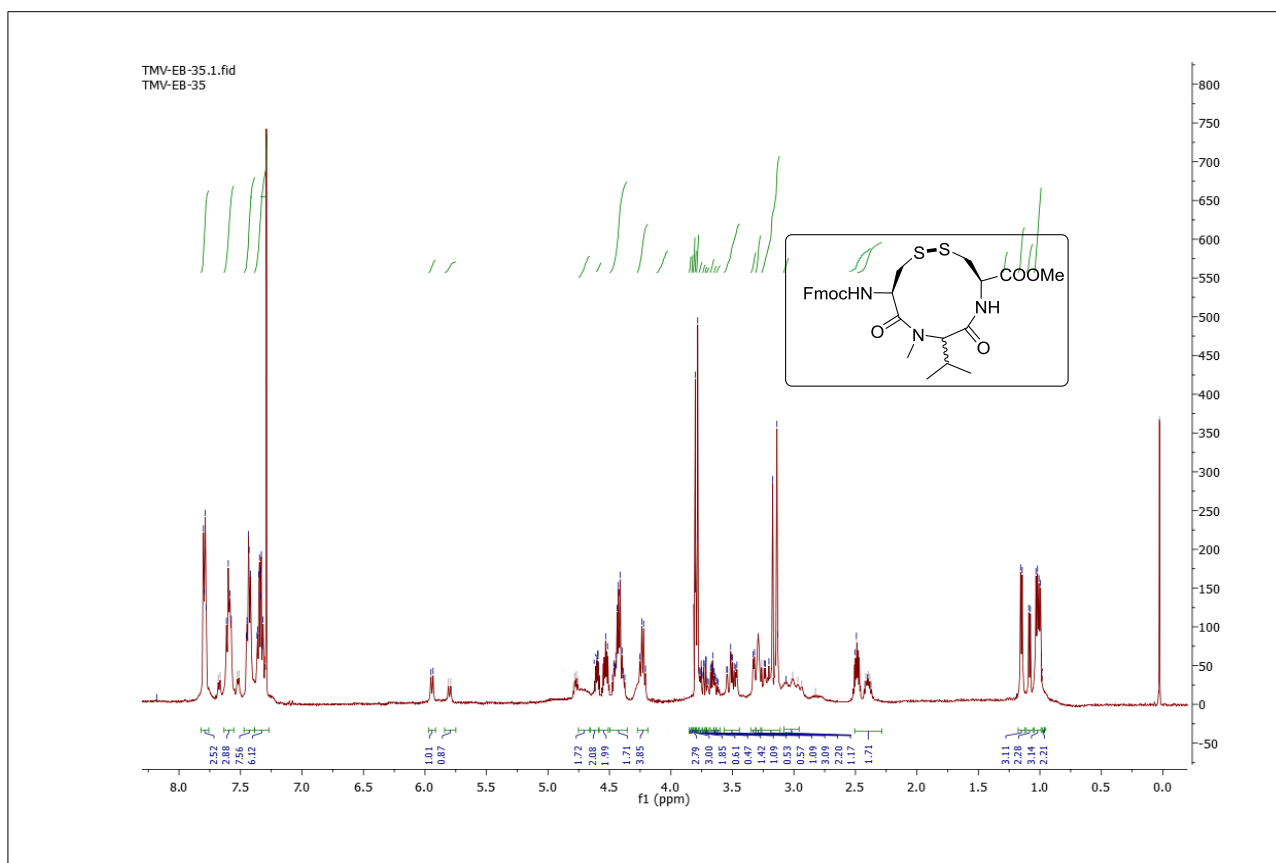

**<sup>1</sup>H NMR of (4R,10R)-methyl 10-(((9H-fluoren-9-yl)methoxy)carbonyl)amino)-7-isopropyl-8-methyl-6,9-dioxo-1,2-dithia-5,8-diazacycloundecane-4-carboxylate, 4f**

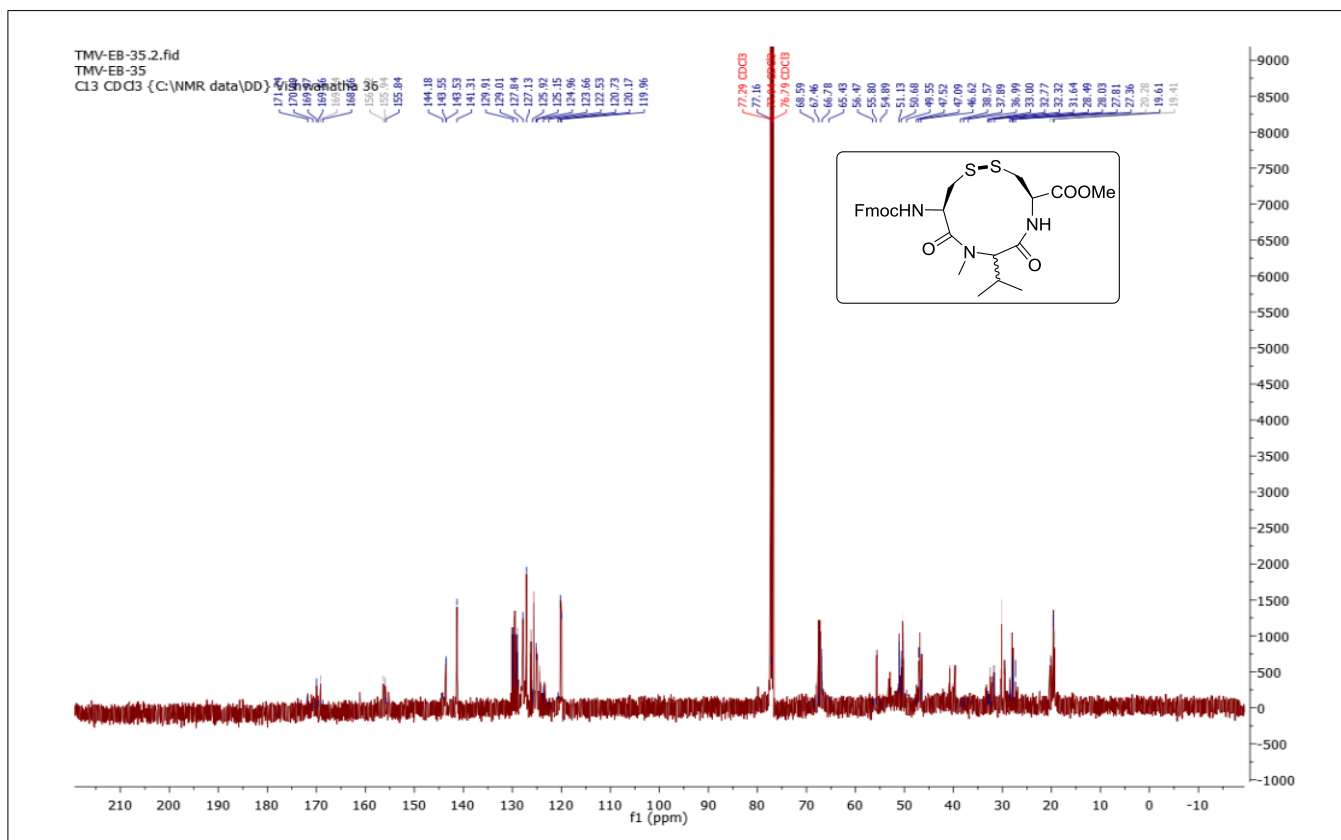

**<sup>13</sup>C NMR of (4R,10R)-methyl 10-(((9H-fluoren-9-yl)methoxy)carbonyl)amino)-7-isopropyl-8-methyl-6,9-dioxo-1,2-dithia-5,8-diazacycloundecane-4-carboxylate, 4f**

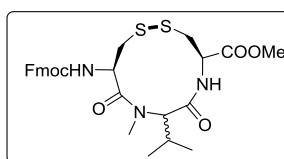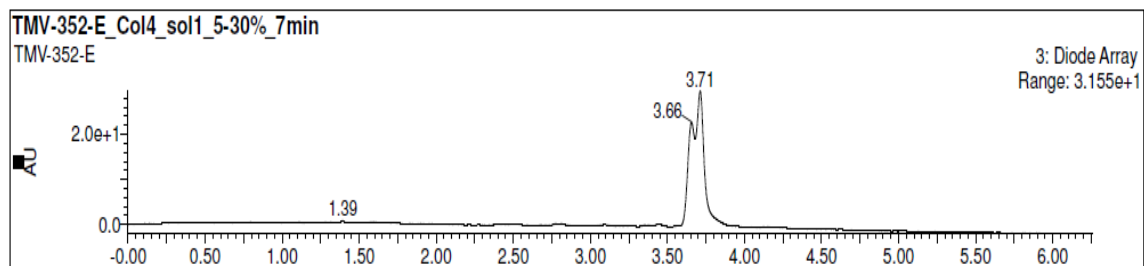

TMV-EB35 #215 RT: 4.77806 AV: 1 NL: 7.65E7  
T: FTMS + p ESI Full ms [200.00-2000.00]

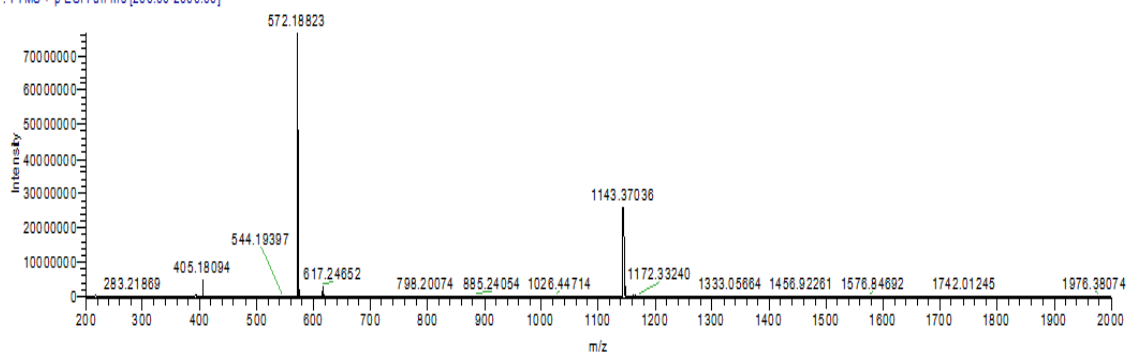

**SFC-HPLC and HRMS of (4R,10R)-methyl 10-(((9H-fluoren-9-yl)methoxy)carbonyl)amino-7-isopropyl-8-methyl-6,9-dioxo-1,2-dithia-5,8-diazacycloundecane-4-carboxylate, 4f**



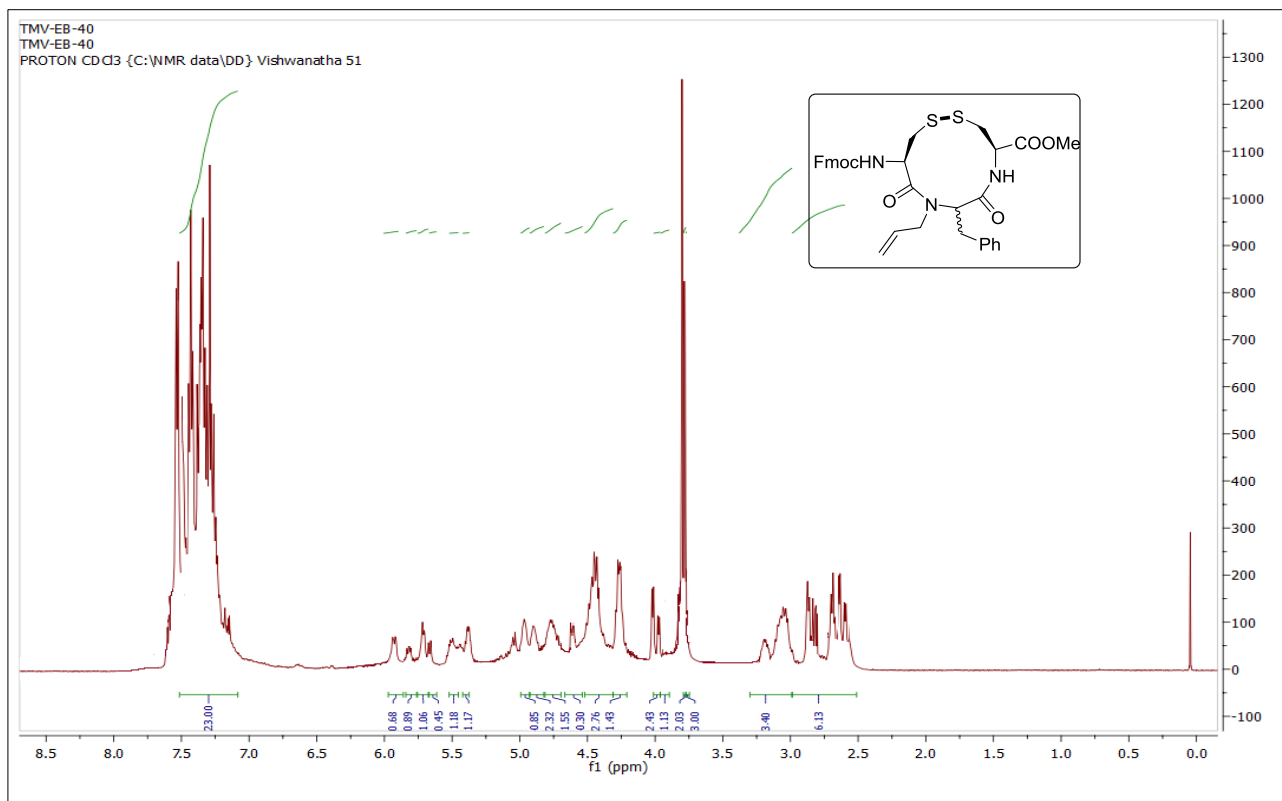

**<sup>1</sup>H NMR of (4R,10R)-methyl 10-(((9H-fluoren-9-yl)methoxy)carbonyl)amino)-8-allyl-7-benzyl-6,9-dioxo-1,2-dithia-5,8-diazacycloundecane-4-carboxylate, 4g**

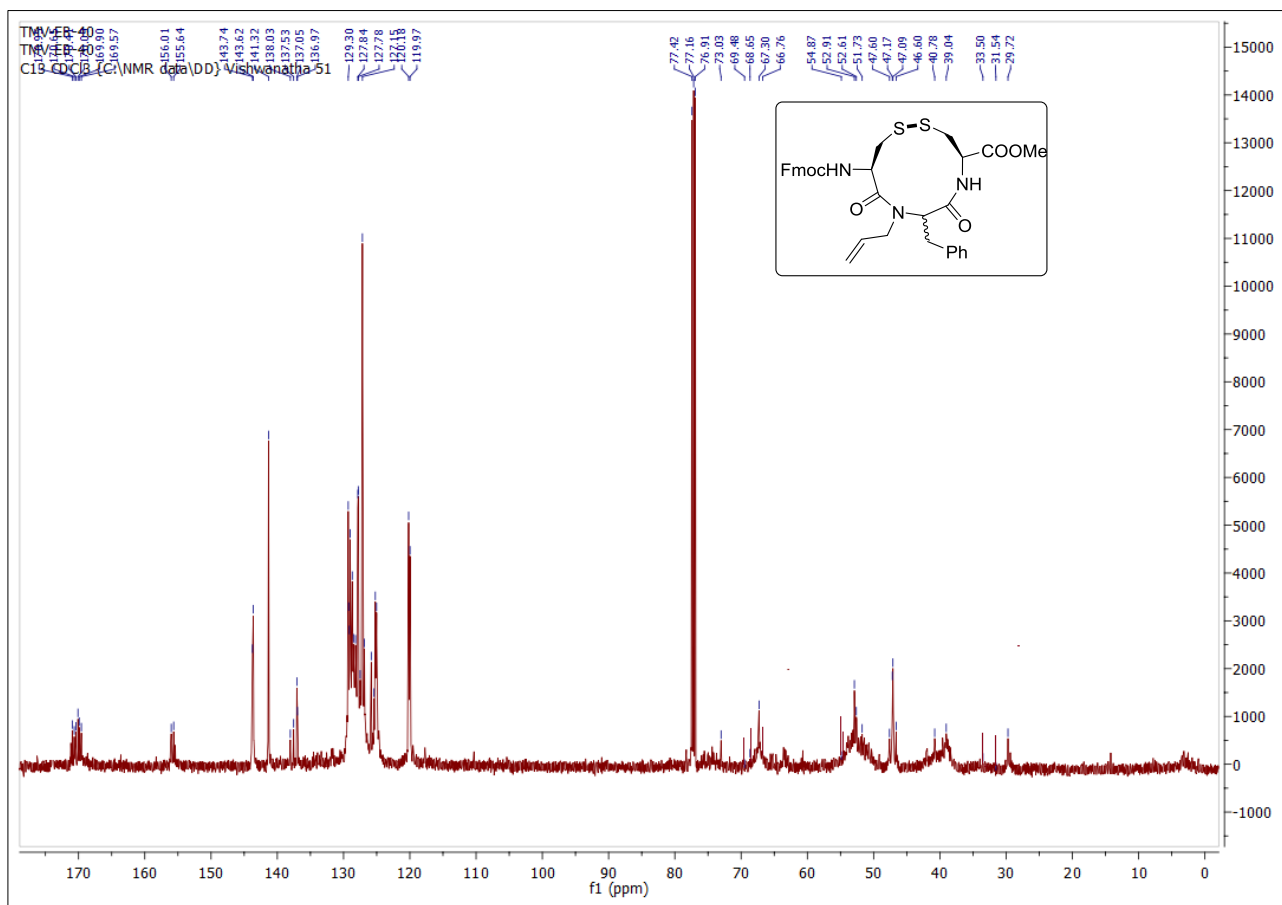

**<sup>13</sup>C NMR of (4R,10R)-methyl 10-(((9H-fluoren-9-yl)methoxy)carbonyl)amino)-8-allyl-7-benzyl-6,9-dioxo-1,2-dithia-5,8-diazacycloundecane-4-carboxylate, 4g**

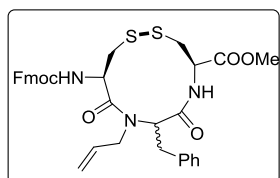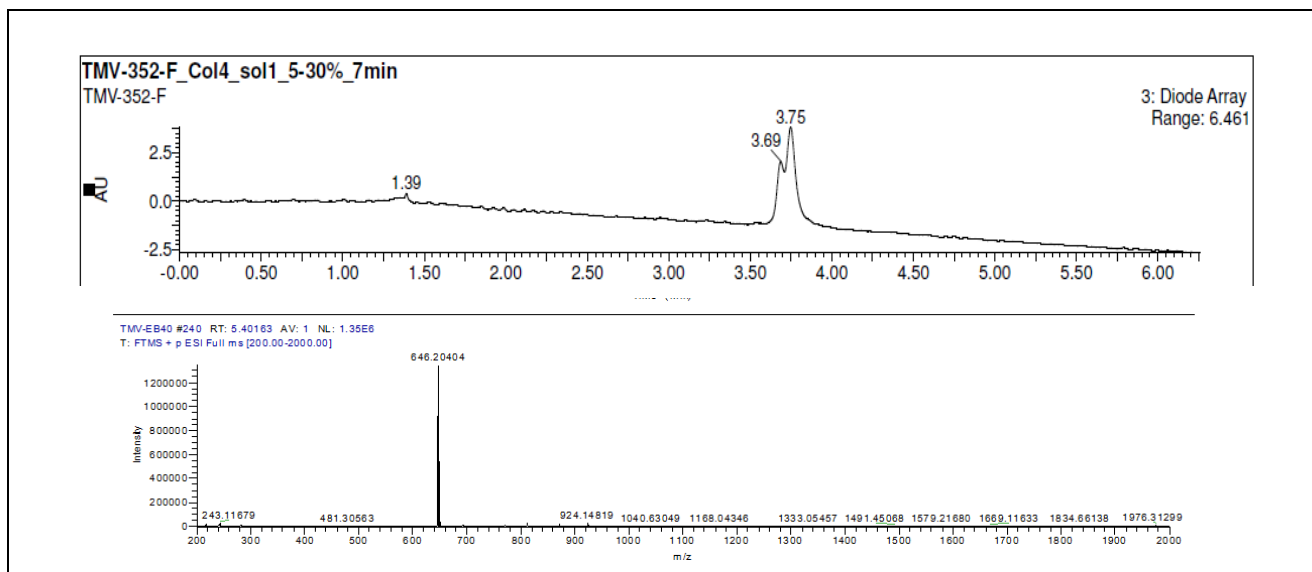

**SFC-HPLC and HRMS of (4R,10R)-methyl 10-(((9H-fluoren-9-yl)methoxy)carbonyl)amino)-8-allyl-7-benzyl-6,9-dioxo-1,2-dithia-5,8-diazacycloundecane-4-carboxylate, 4g**



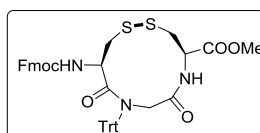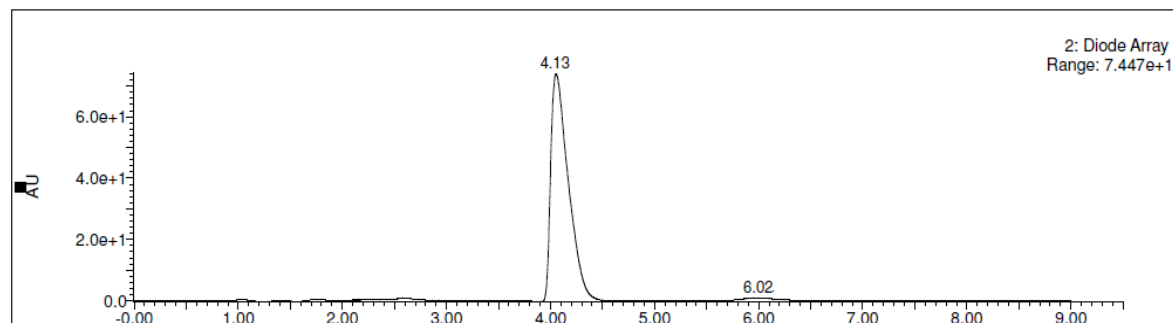

TMV-EB44 #252 RT: 5.73529 AV: 1 NL: 6.26E5

T: FTMS + p ESI Full ms [200.00-2000.00]

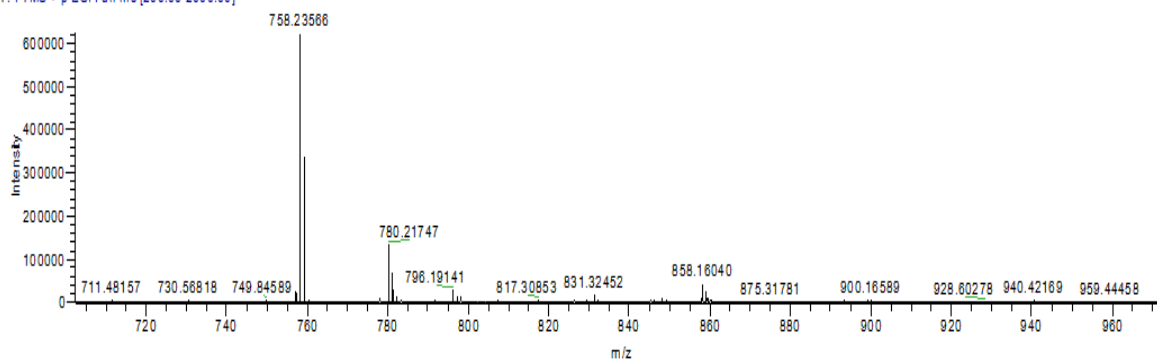

**SFC-HPLC and HRMS of (4R,10R)-methyl 10-(((9H-fluoren-9-yl)methoxy)carbonyl)amino)-6,9-dioxo-8-trityl-1,2-dithia-5,8-diazacycloundecane-4-carboxylate, 4h**

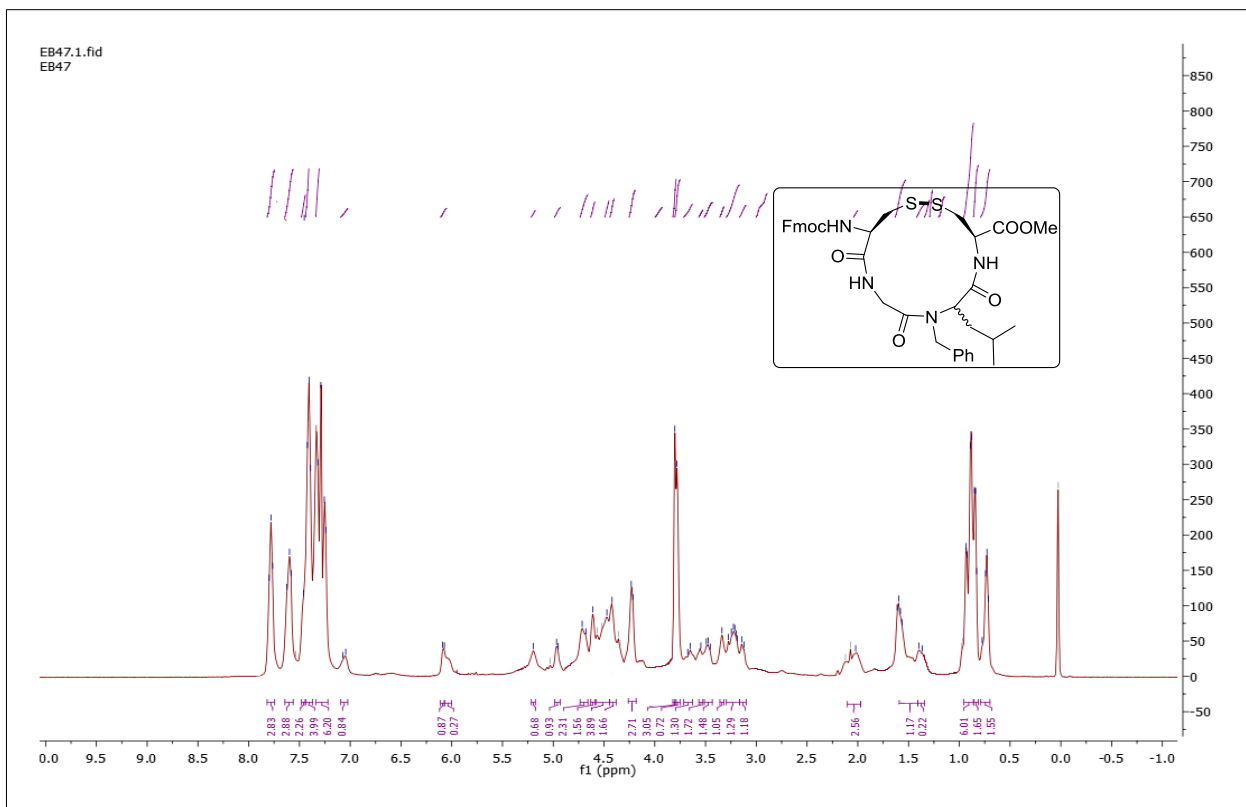

<sup>1</sup>H NMR of (4R,13R)-methyl 13-(((9H-fluoren-9-yl)methoxy)carbonyl)amino)-8-benzyl-7-isobutyl-6,9,12-trioxo-1,2-dithia-5,8,11-triazacyclotetradecane-4-carboxylate, 4i

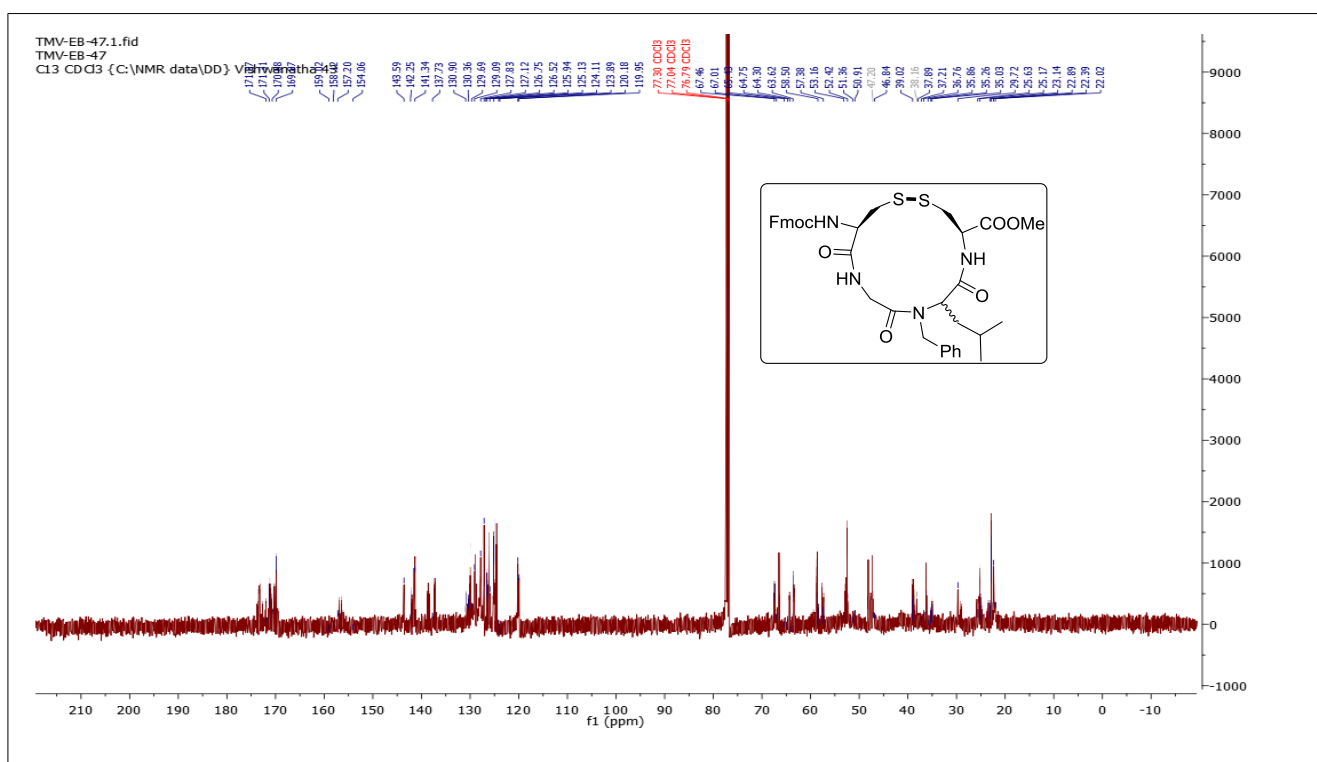

<sup>13</sup>C NMR of (4R,13R)-methyl 13-(((9H-fluoren-9-yl)methoxy)carbonyl)amino)-8-benzyl-7-isobutyl-6,9,12-trioxo-1,2-dithia-5,8,11-triazacyclotetradecane-4-carboxylate, 4i

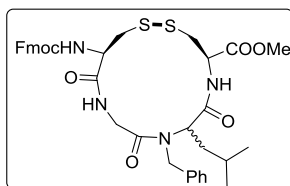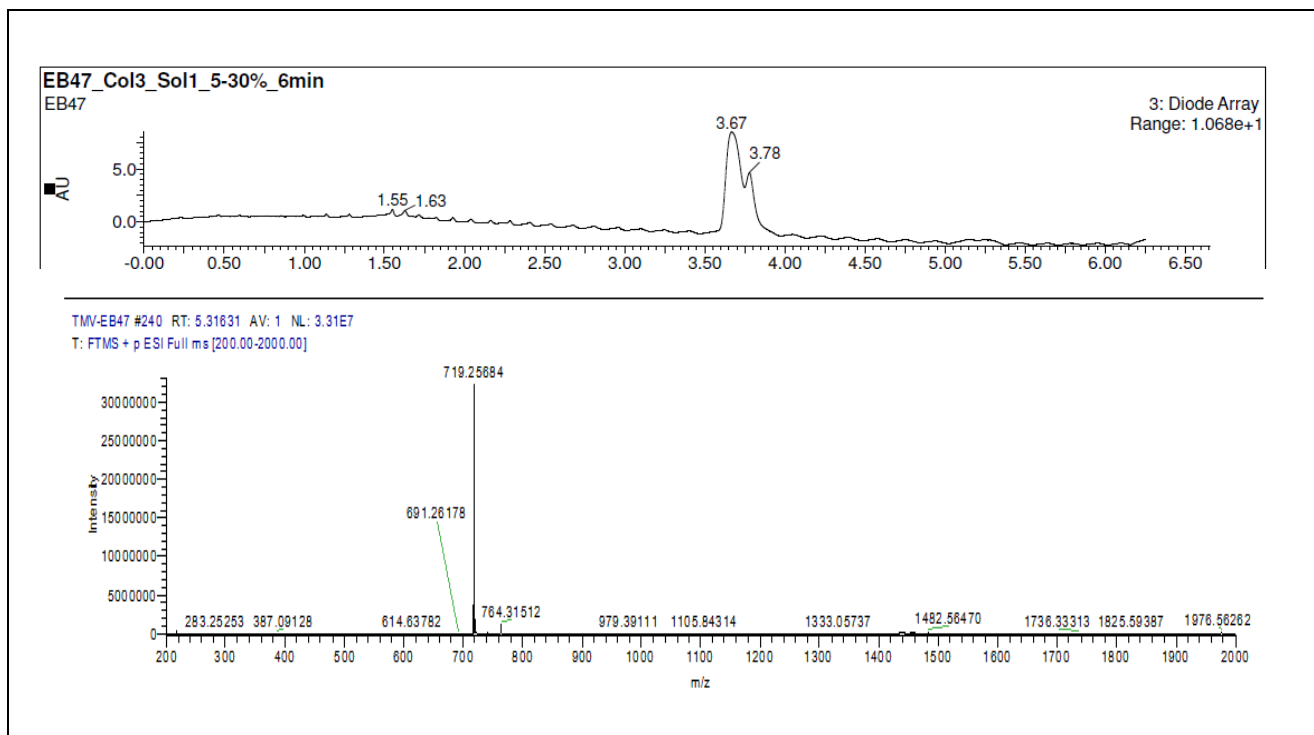

SFC-HPLC and HRMS of (4R,13R)-methyl 13-(((9H-fluoren-9-yl)methoxy)carbonyl)amino)-8-benzyl-7-isobutyl-6,9,12-trioxo-1,2-dithia-5,8,11-triazacyclotetradecane-4-carboxylate, 4i

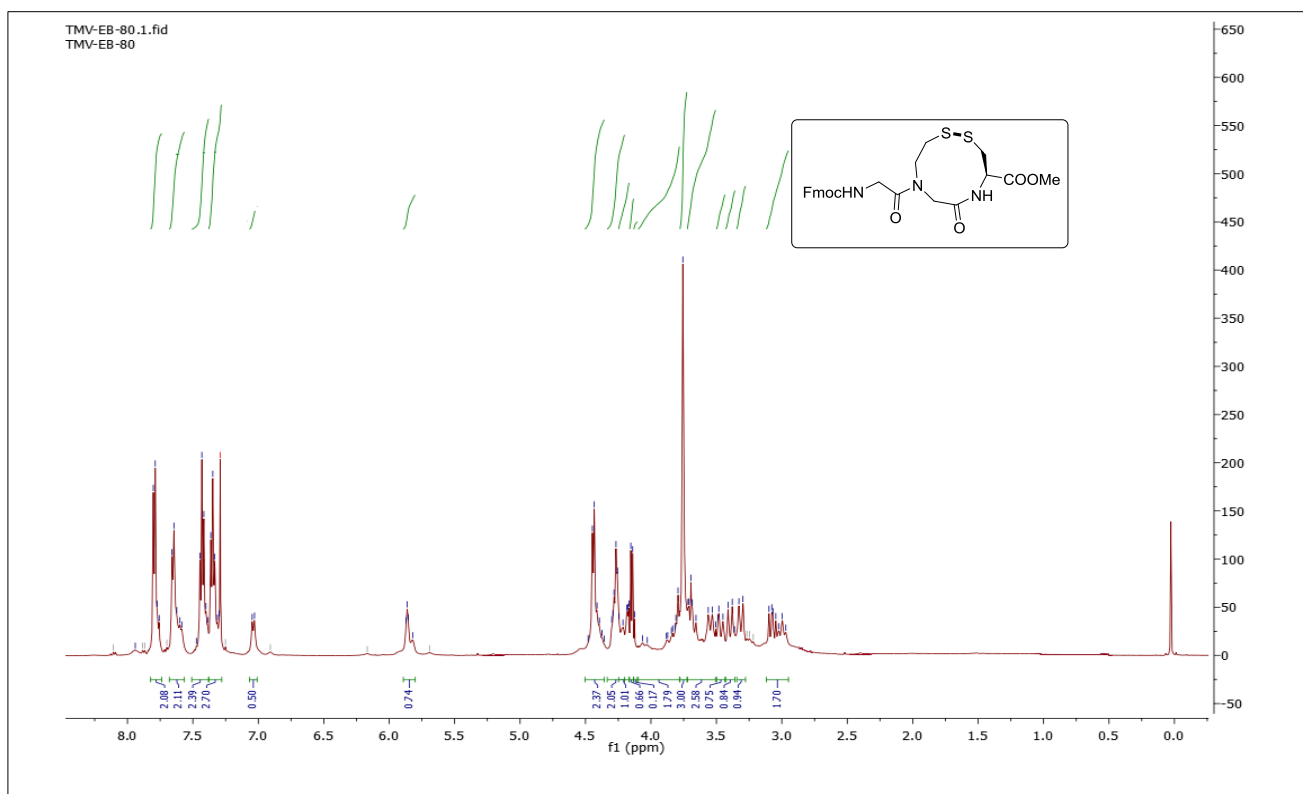

**<sup>1</sup>H NMR of (R)-methyl 8-(2-(((9H-fluoren-9-yl)methoxy)carbonyl)amino)acetyl)-6-oxo-1,2,5,8-dithiadiazecane-4-carboxylate, 4j**

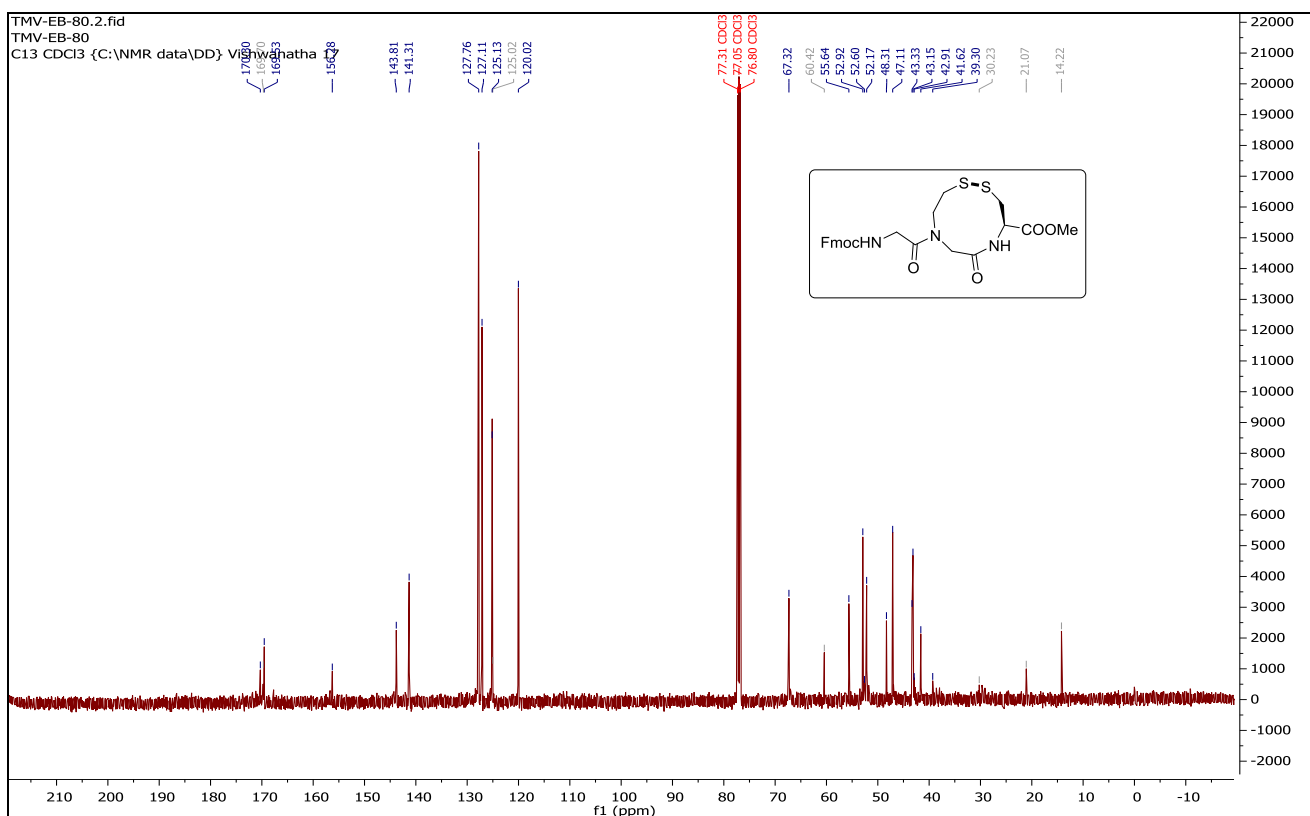

**<sup>13</sup>C NMR of (R)-methyl 8-(2-(((9H-fluoren-9-yl)methoxy)carbonyl)amino)acetyl)-6-oxo-1,2,5,8-dithiadiazecane-4-carboxylate, 4j**

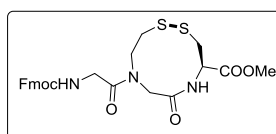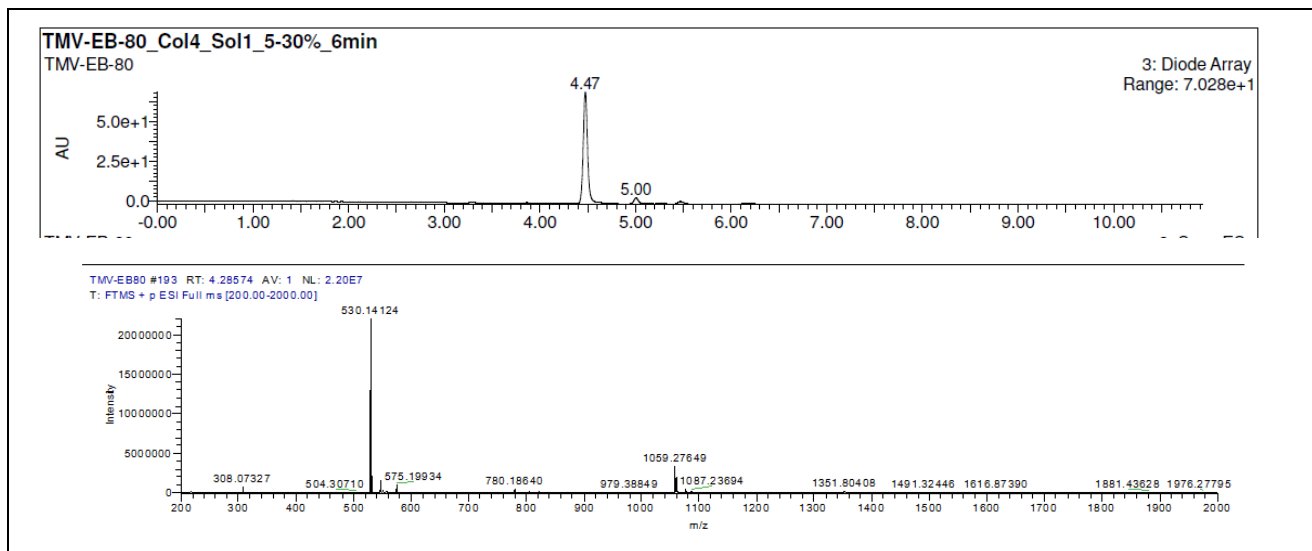

SFC-HPLC and HRMS of (R)-methyl 8-(2-(((9H-fluoren-9-yl)methoxy)carbonyl)amino)acetyl)-6-oxo-1,2,5,8-dithiadiazecane-4-carboxylate, 4j



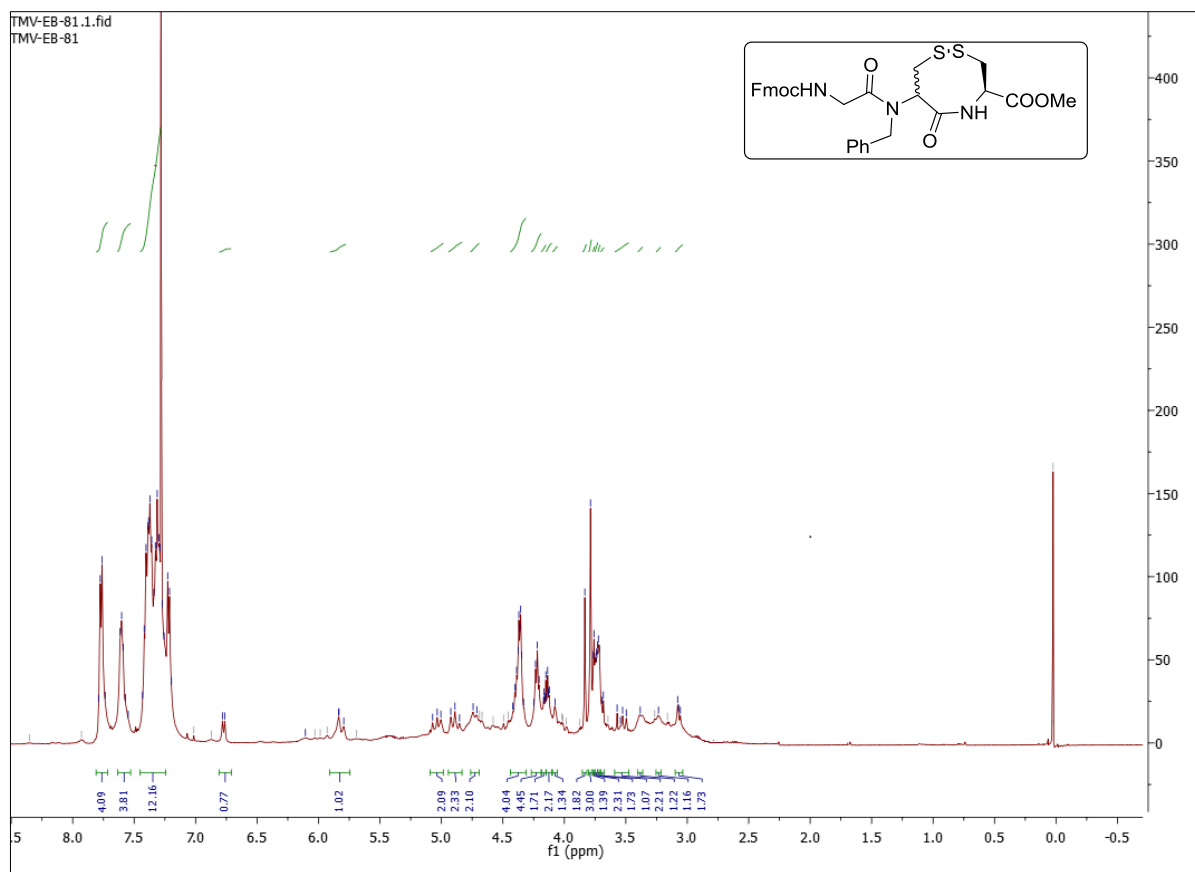

$^1\text{H}$  NMR of (4R)-methyl 7-(2-(((9H-fluoren-9-yl)methoxy)carbonyl)amino)-N-benzylacetamido)-6-oxo-1,2,5-dithiazocane-4-carboxylate, **4k**

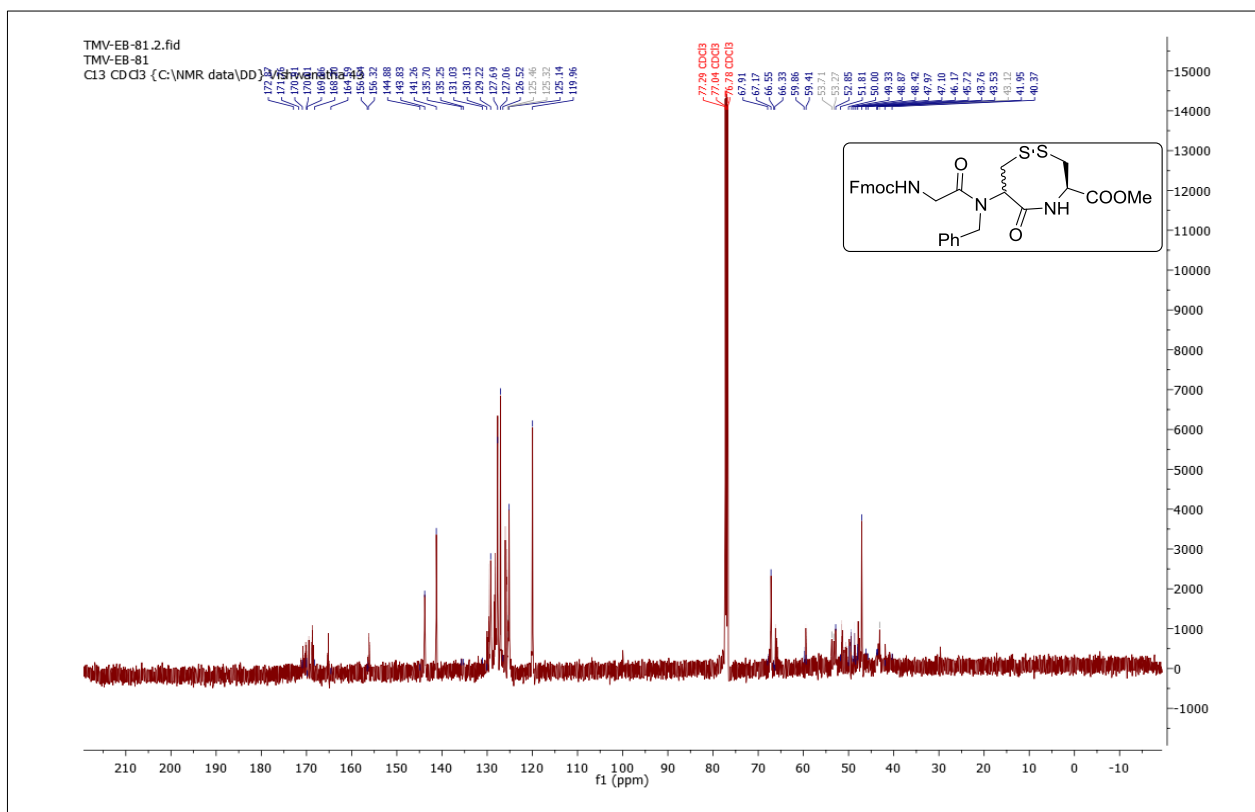

$^{13}\text{C}$  NMR of (4R)-methyl 7-(2-(((9H-fluoren-9-yl)methoxy)carbonyl)amino)-N-benzylacetamido)-6-oxo-1,2,5-dithiazocane-4-carboxylate, **4k**

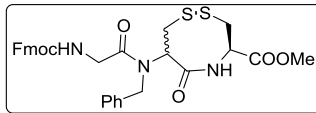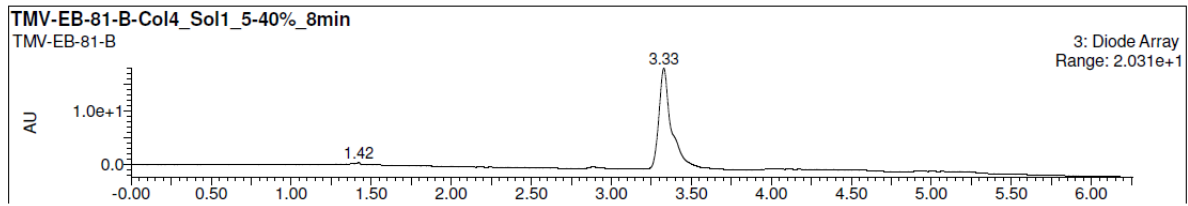

TMV-EB81 #220 RT: 4.97539 AV: 1 NL: 4.20E6  
T: FTMS + p ESI Full m s [200.00-2000.00]

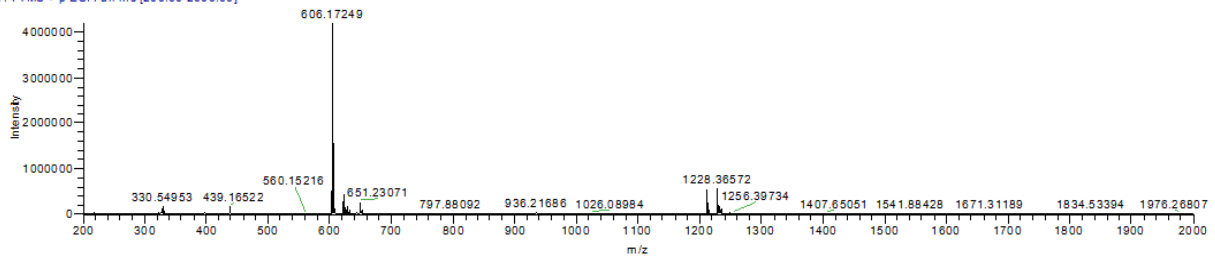

**SFC-HPLC and HRMS of (4R)-methyl 7-(2-(((9H-fluoren-9-yl)methoxy)carbonyl)amino)-N-benzylacetamido)-6-oxo-1,2,5-dithiazocane-4-carboxylate, 4k**

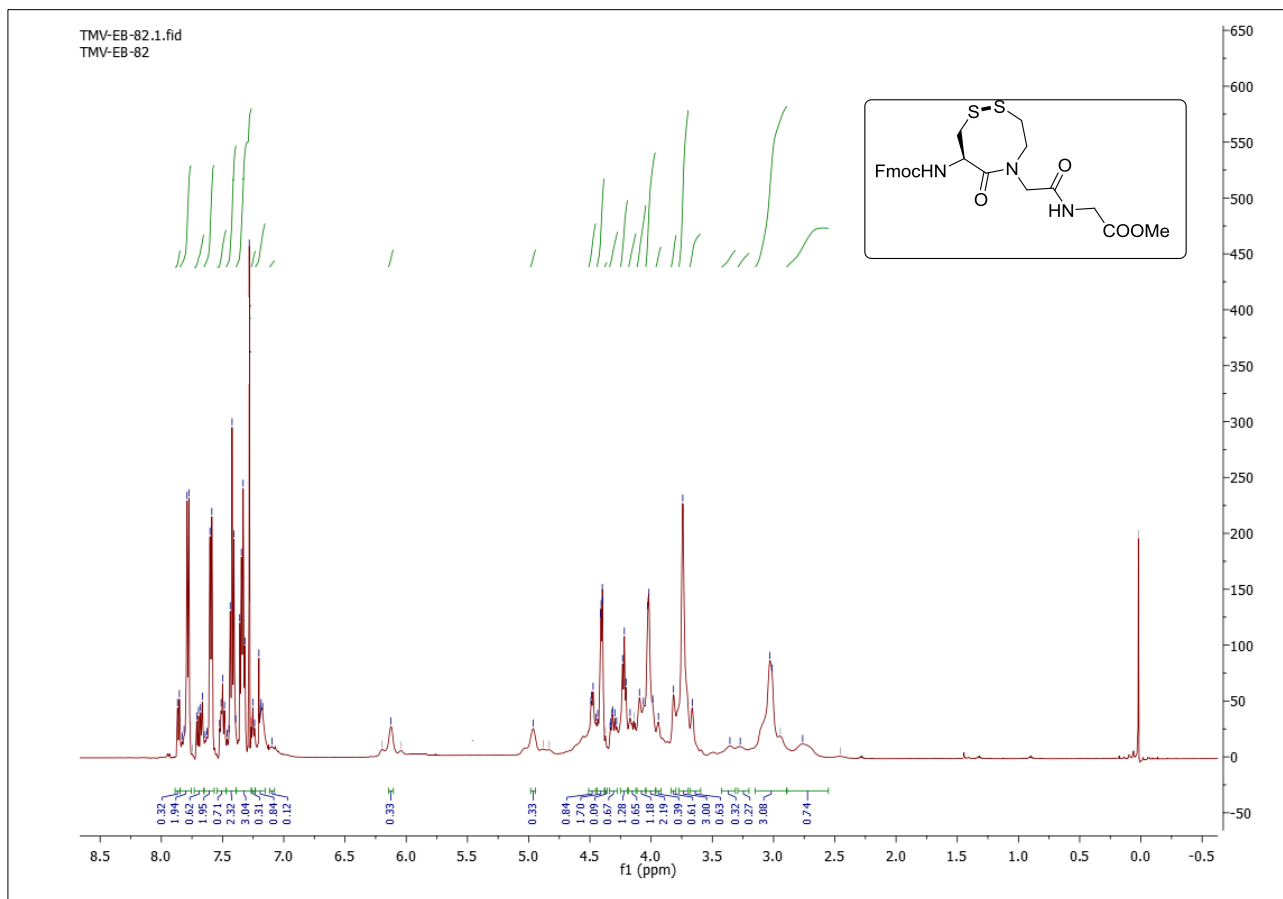

**<sup>1</sup>H NMR of (R)-methyl 2-(2-(7-(((9H-fluoren-9-yl)methoxy)carbonyl)amino)-6-oxo-1,2,5-dithiazocan-5-yl)acetamido)acetate, 4l**

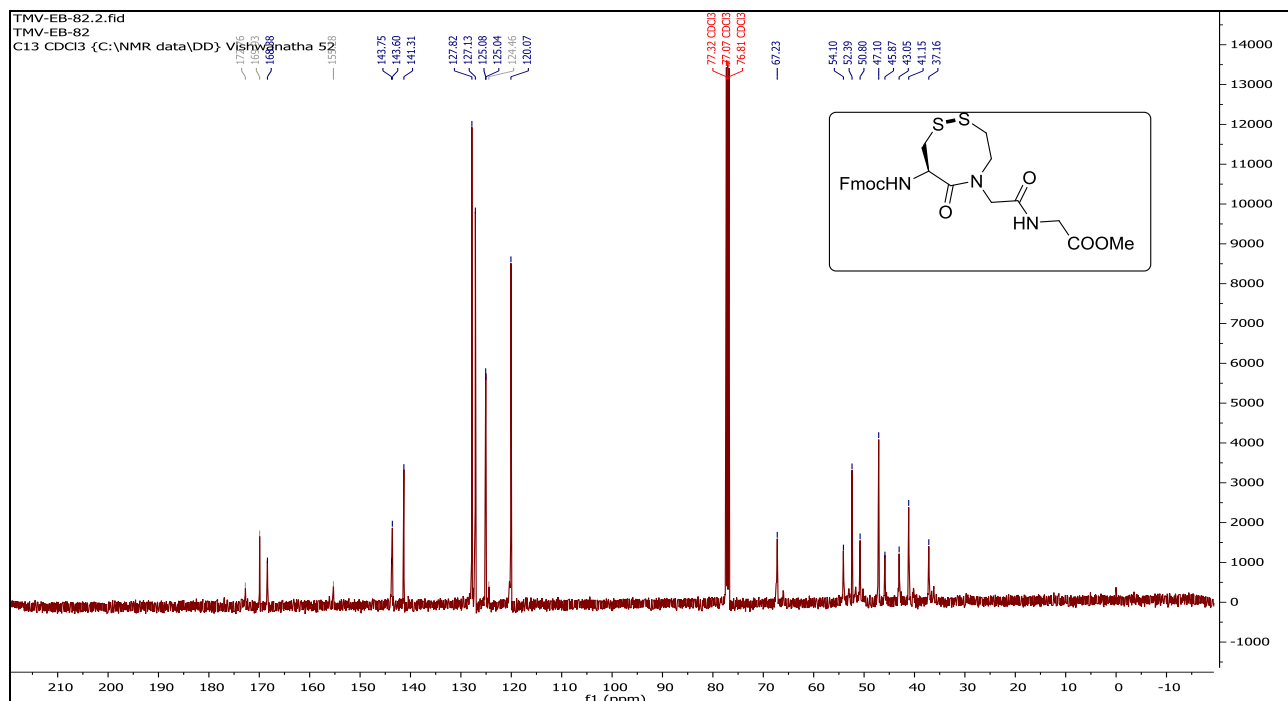

**<sup>13</sup>C NMR of (R)-methyl 2-(2-(7-(((9H-fluoren-9-yl)methoxy)carbonyl)amino)-6-oxo-1,2,5-dithiazocan-5-yl)acetamido)acetate, 4l**

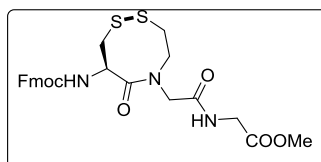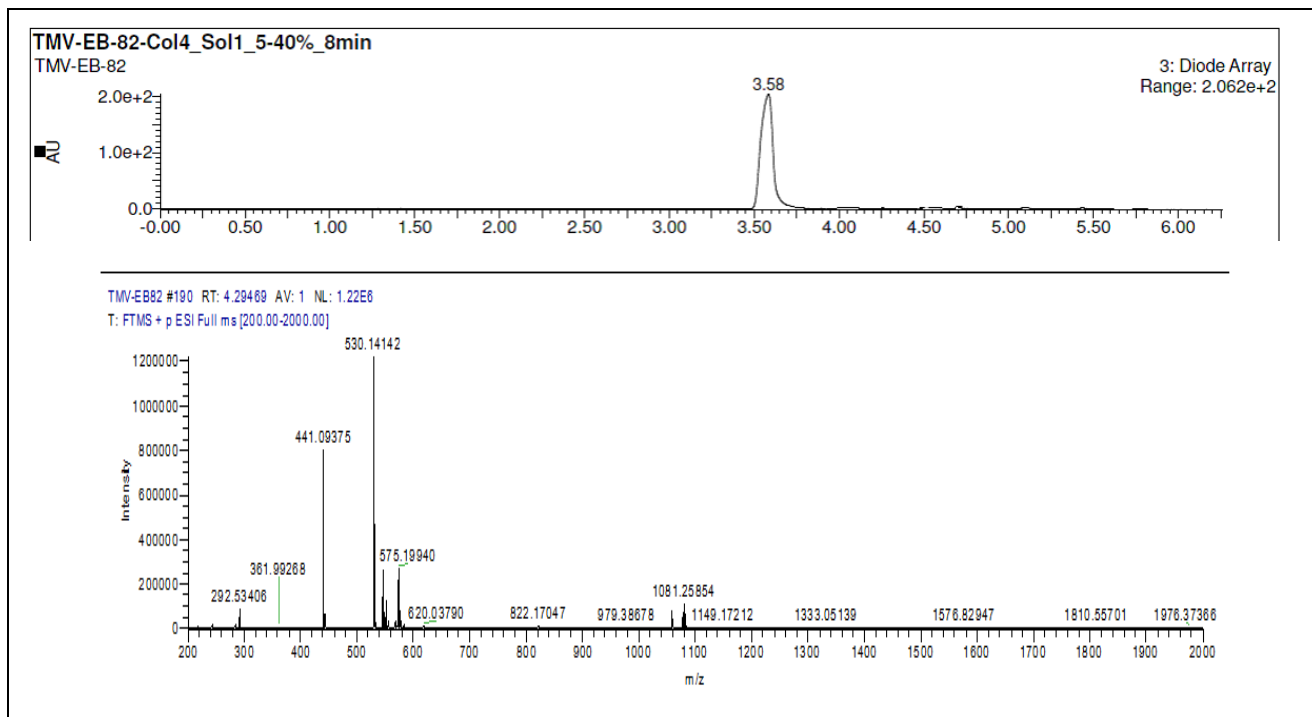

**SFC-HPLC and HRMS of (R)-methyl 2-(2-(7-(((9H-fluoren-9-yl)methoxy)carbonyl)amino)-6-oxo-1,2,5-dithiazocan-5-yl)acetamido)acetate, 4l**

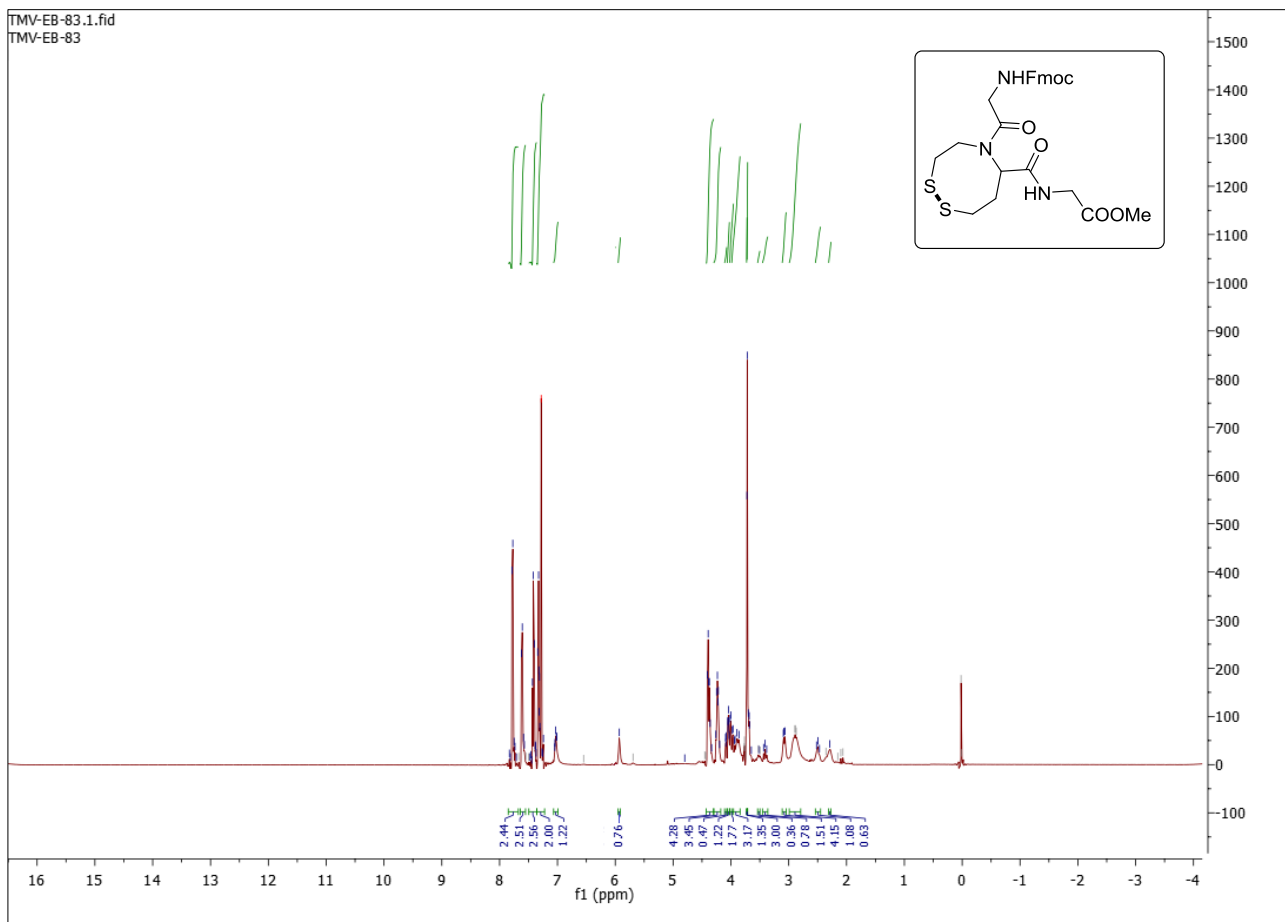

<sup>1</sup>H NMR of methyl 2-(5-(2-(((9H-fluoren-9-yl)methoxy)carbonyl)amino)acetyl)-1,2,5-dithiazocane-6-carboxamido)acetate, 4m

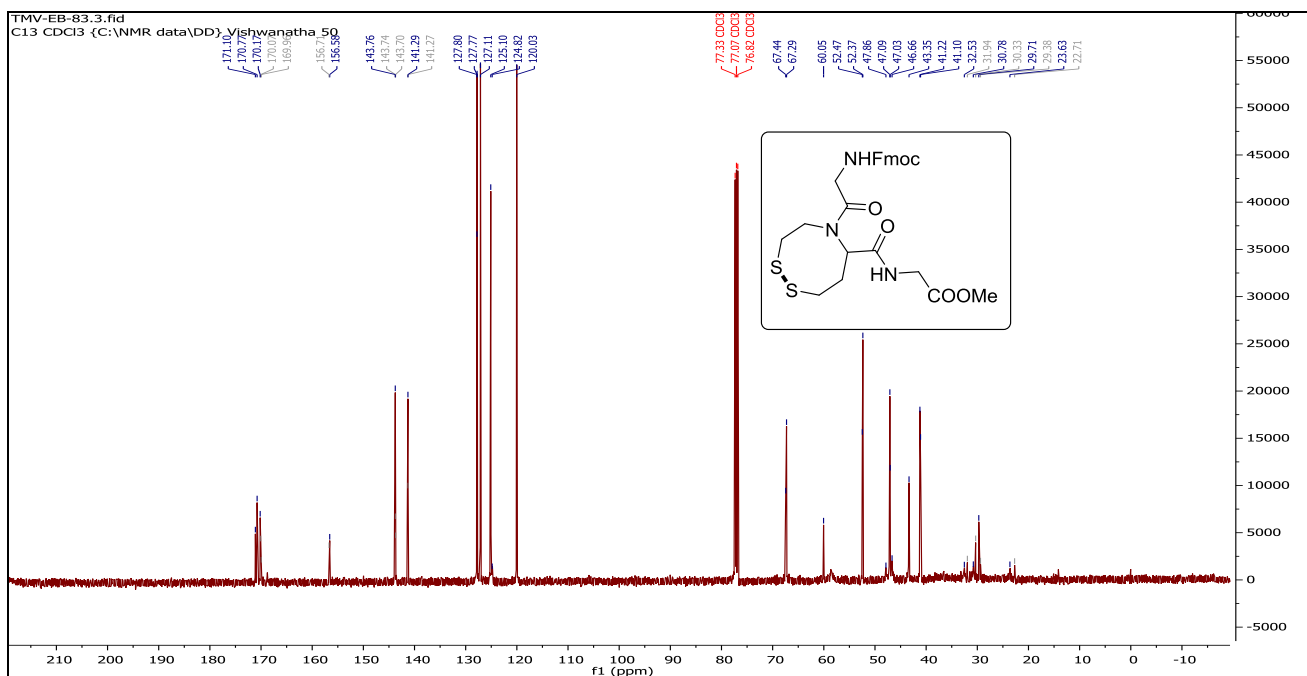

<sup>13</sup>C NMR of methyl 2-(5-(2-(((9H-fluoren-9-yl)methoxy)carbonyl)amino)acetyl)-1,2,5-dithiazocane-6-carboxamido)acetate, 4m

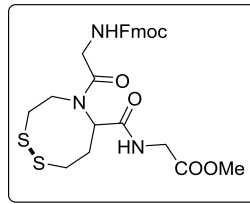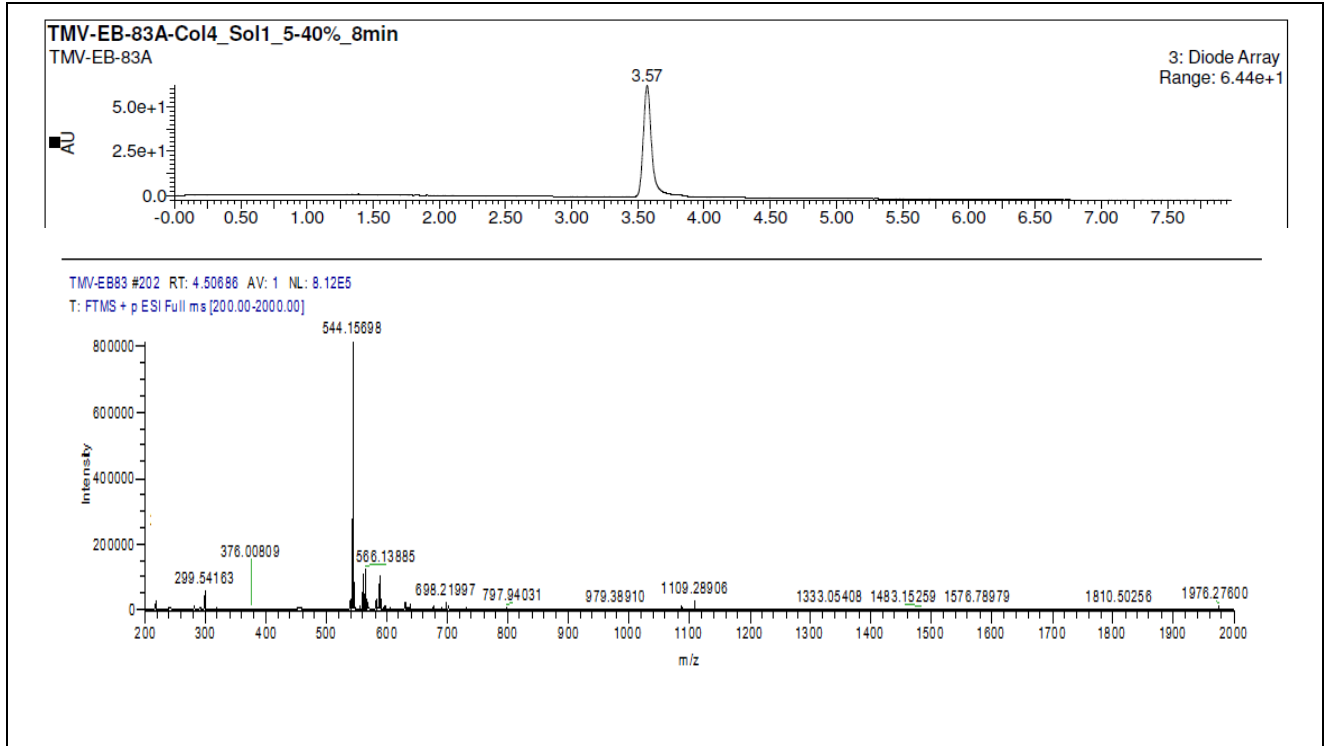

SFC-HPLC and HRMS of methyl 2-(5-(2-(((9H-fluoren-9-yl)methoxy)carbonyl)amino)acetyl)-1,2,5-dithiazocane-6-carboxamido)acetate, 4m



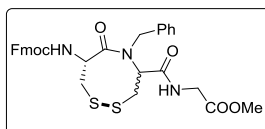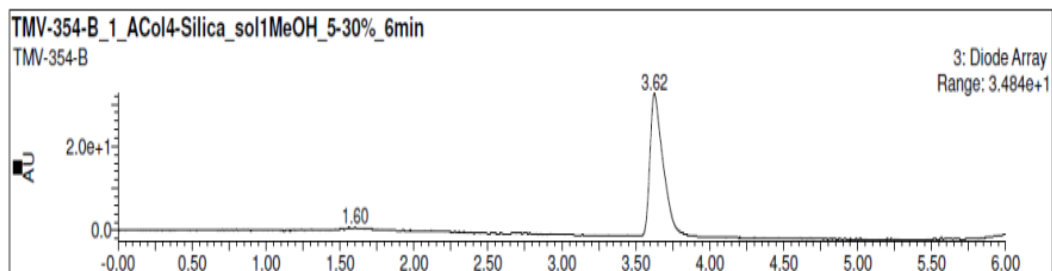

TMV-EB84 #220 RT: 4.98739 AV: 1 NL: 6.34E7  
 T: FTMS + p ESI Full ms [200.00-2000.00]

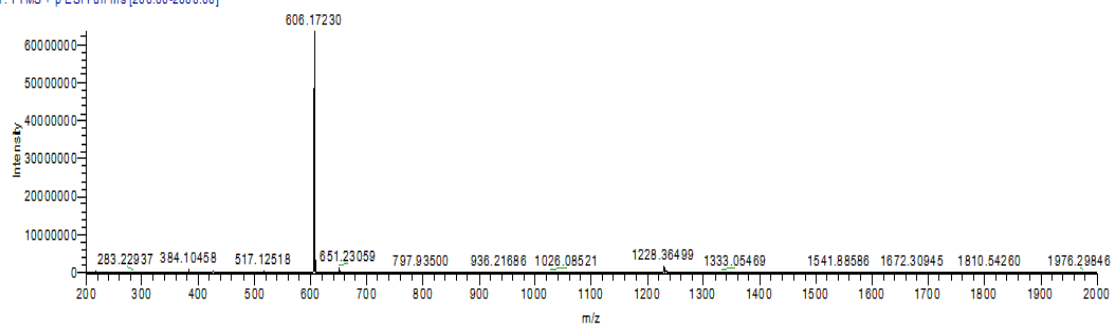

**SFC-HPLC and HRMS of methyl 2-((7R)-7-(((9H-fluoren-9-yl)methoxy)carbonyl)amino)-5-benzyl-6-oxo-1,2,5-dithiazocane-4-carboxamido)acetate, 4n**



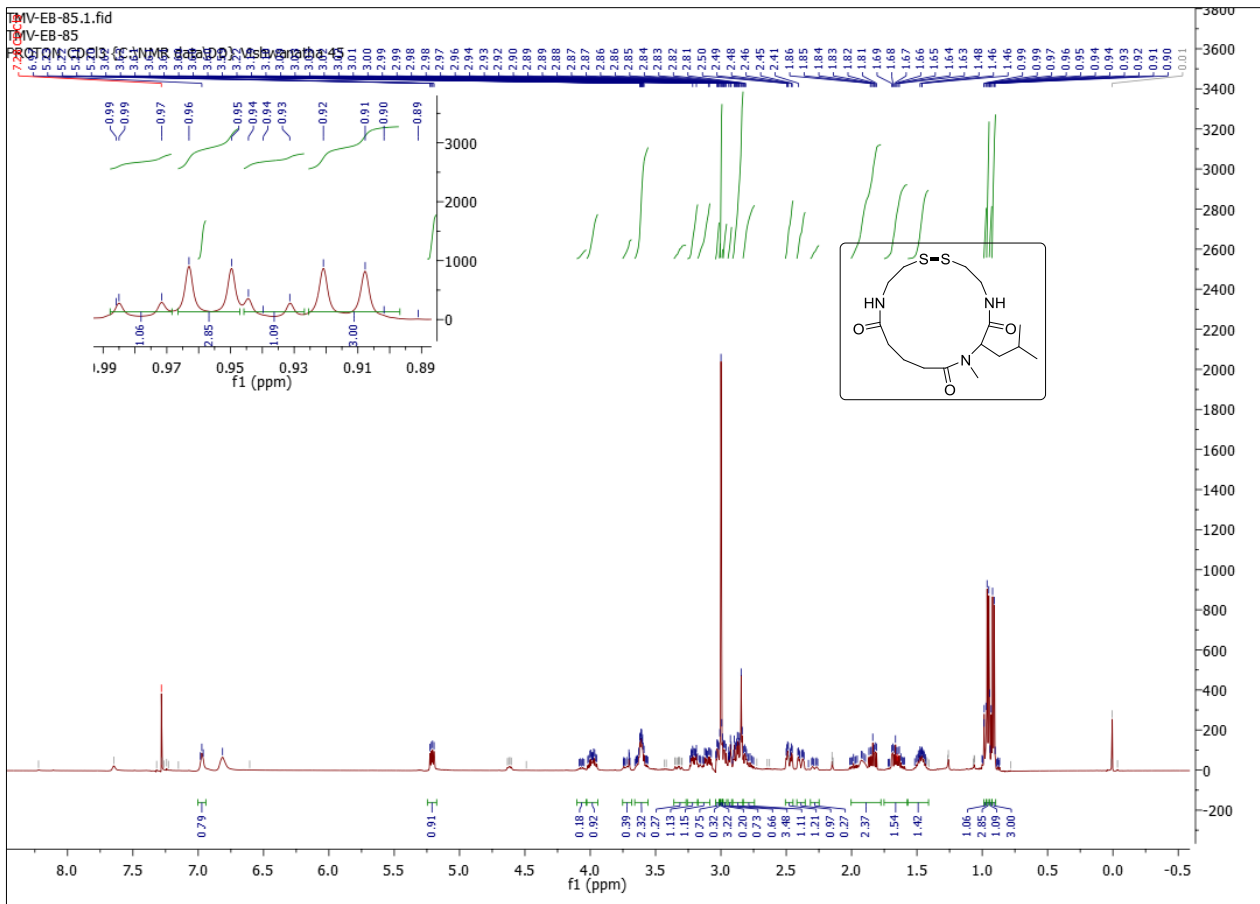

<sup>1</sup>H NMR of 7-isobutyl-8-methyl-1,2-dithia-5,8,14-triazacyclohexadecane-6,9,13-trione, 4o

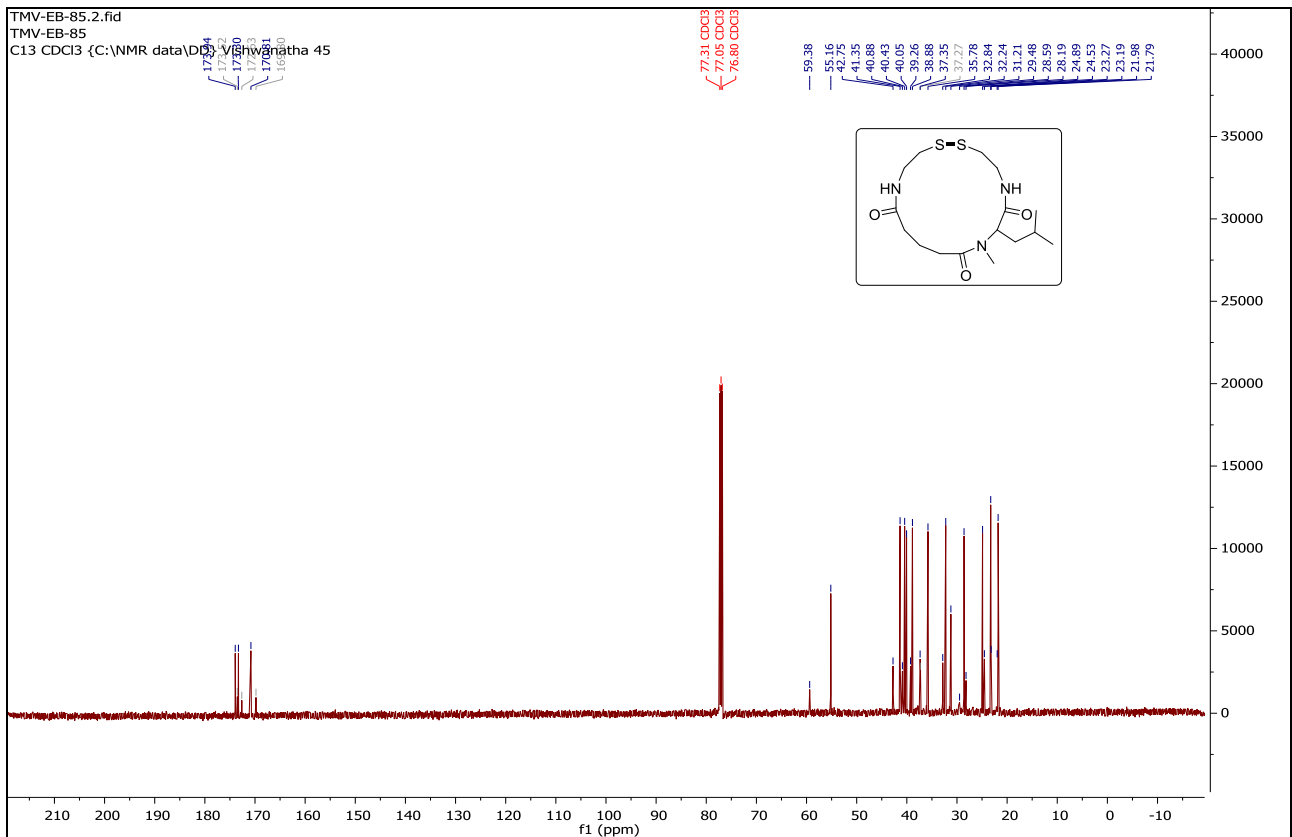

<sup>13</sup>C NMR of 7-isobutyl-8-methyl-1,2-dithia-5,8,14-triazacyclohexadecane-6,9,13-trione, 4o

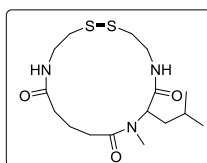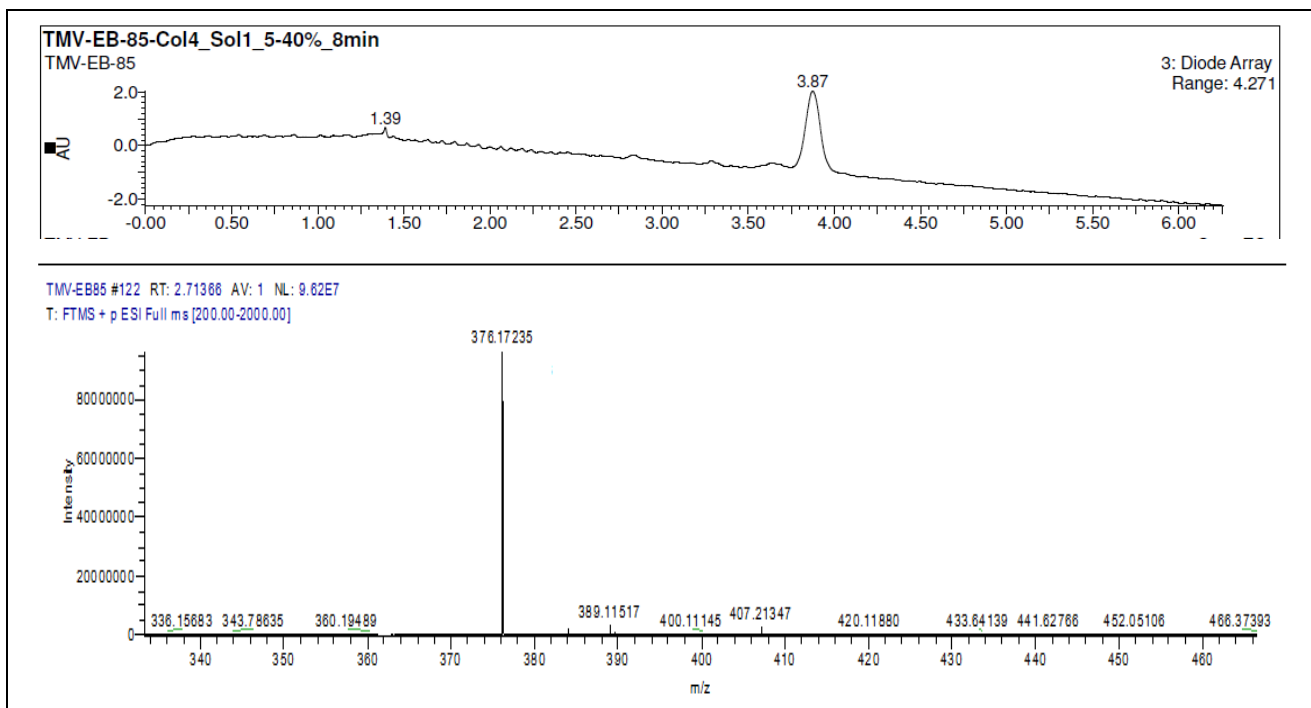

SFC-HPLC and HRMS of 7-isobutyl-8-methyl-1,2-dithia-5,8,14-triazacyclohexadecane-6,9,13-trione, 4o

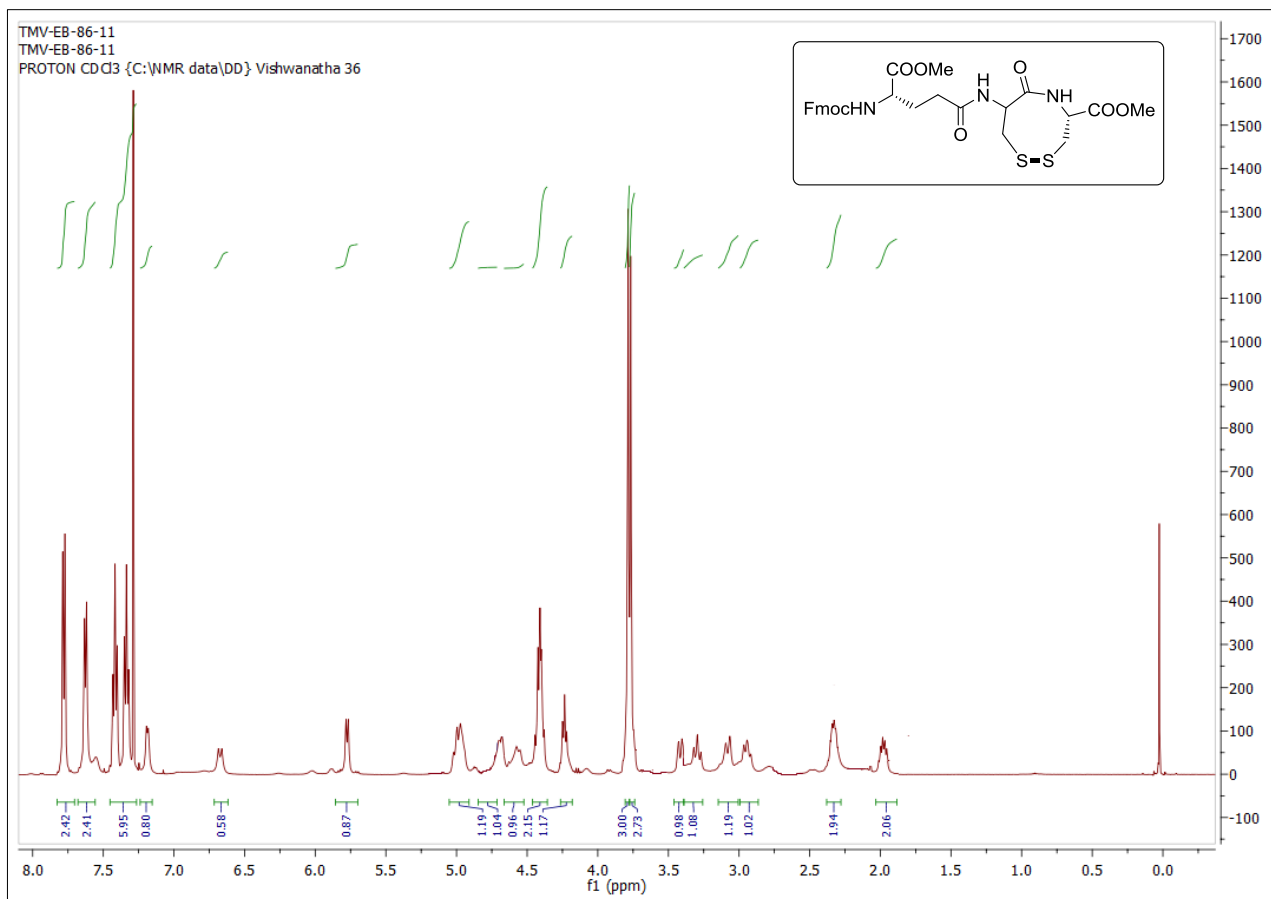

**<sup>1</sup>H NMR of (4R)-methyl 7-((S)-4-(((9H-fluoren-9-yl)methoxy)carbonyl)amino)-5-methoxy-5-oxopentanamido)-6-oxo-1,2,5-dithiazocane-4-carboxylate, 4p**

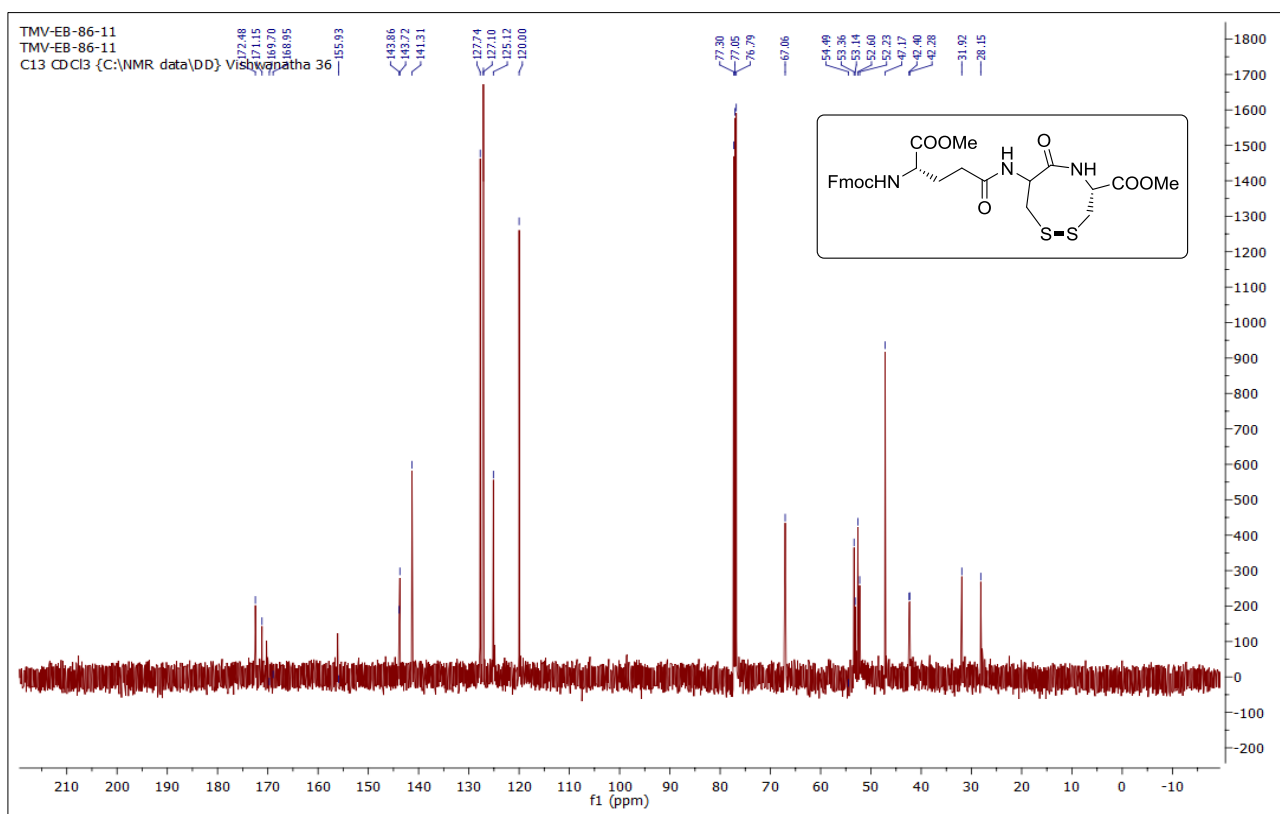

**<sup>13</sup>C NMR of (4R)-methyl 7-((S)-4-(((9H-fluoren-9-yl)methoxy)carbonyl)amino)-5-methoxy-5-oxopentanamido)-6-oxo-1,2,5-dithiazocane-4-carboxylate, 4p**

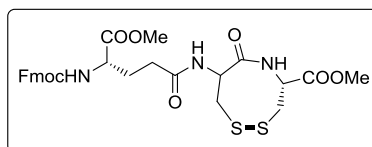

TMV-EB86

02/22/17 13:05:54

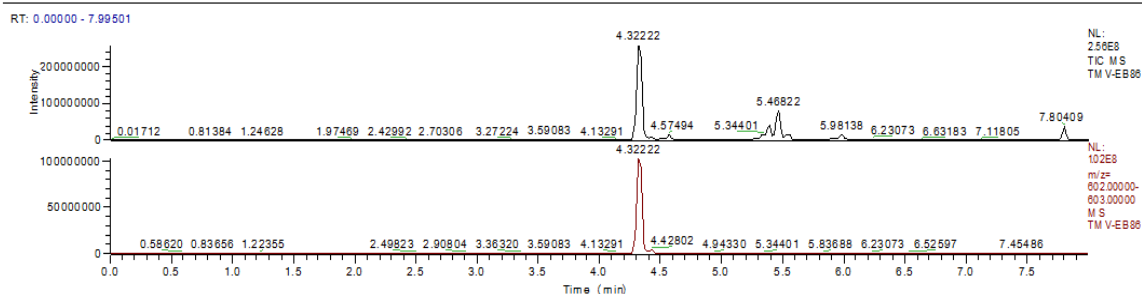

TMV-EB86 #189 RT: 4.26723 AV: 1 NL: 8.98E5  
T: FTMS + p ESI Full ms [200.00-2000.00]

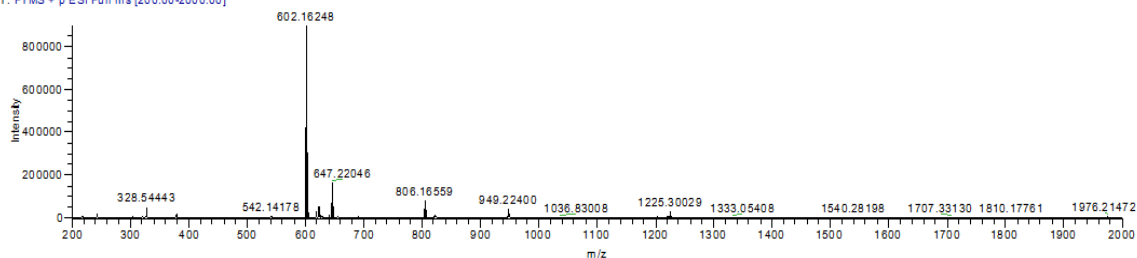

**HPLC and HRMS of (4R)-methyl 7-(((S)-4-(((9H-fluoren-9-yl)methoxy)carbonyl)amino)-5-methoxy-5-oxopentamido)-6-oxo-1,2,5-dithiazocane-4-carboxylate, 4p**



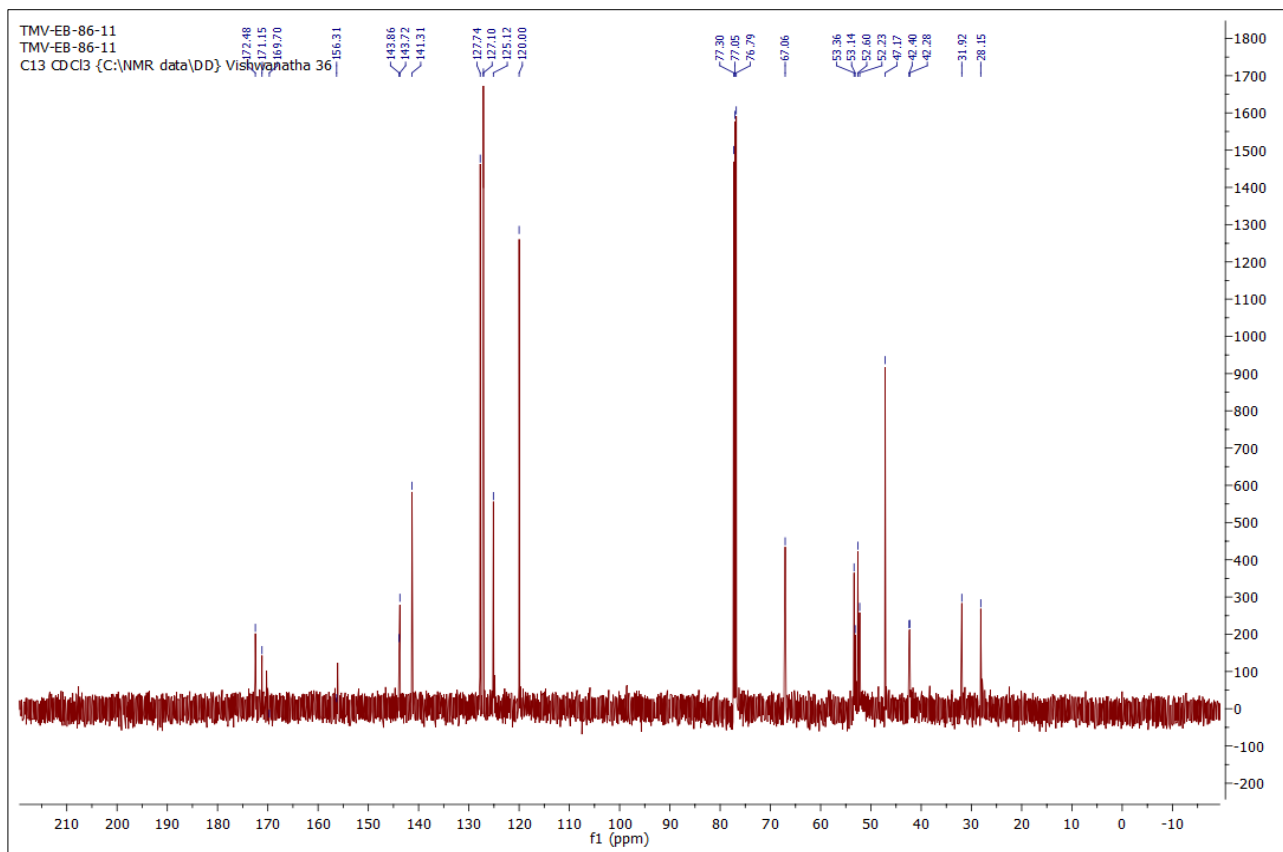

<sup>13</sup>C NMR of disulfide 5 (regioisomeric mixture)

TMV-EB87

02/22/17 13:26:47

RT: 0.00000 - 7.98566

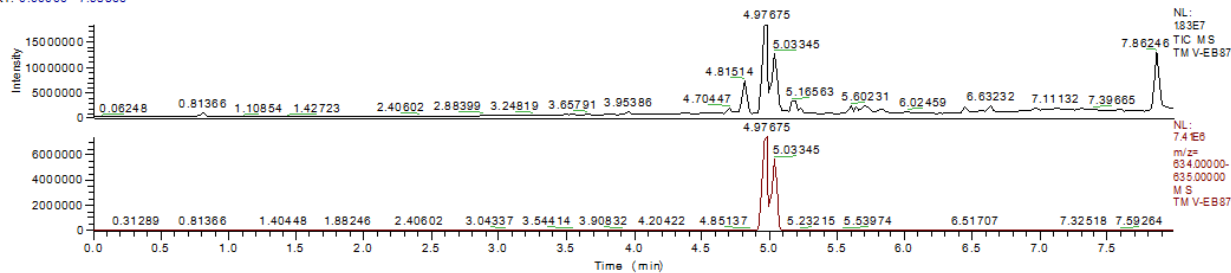

TMV-EB87 #218 RT: 4.91602 AV: 1 NL: 1.02E5

T: FTMS + p ESI Full m/z [200.00-2000.00]

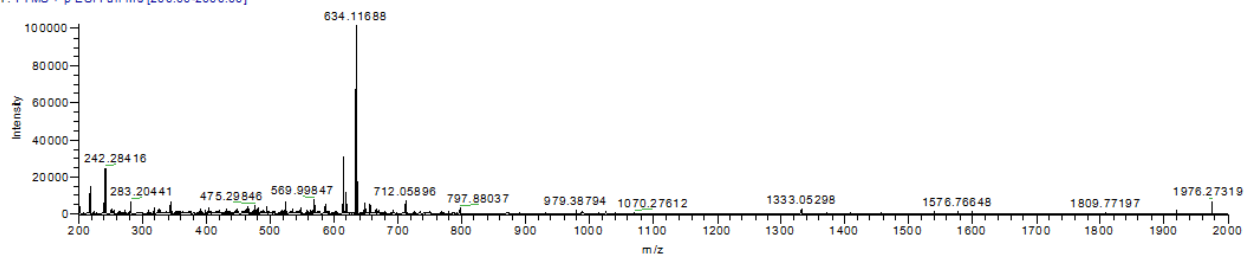

HPLC and HRMS of NMR of disulfide 5 (regioisomeric mixture)
